# Supplementary material for: Redefining paradigms in the archaeal virus-host arms race
Source: Research Square preprint supplement (doi:10.21203/rs.3.rs-6490351/v1), 2025-05-02
Supplement: Supplementary file 1 [file 7e4ea1c5ae79c1ed67c49498.xlsx]

## Sheet: ST1
Supplementary Table 1. List of genomes analyzed
genome_accession	domain	phylum	class	order	family	genus	species	name_ncbi	strain_ncbi
GCA_000006805.1	d__Archaea	p__Halobacteriota	c__Halobacteria	o__Halobacteriales	f__Halobacteriaceae	g__Halobacterium	s__Halobacterium salinarum	Halobacterium salinarum NRC-1	strain=NRC-1; ATCC 700922
GCA_000007005.1	d__Archaea	p__Thermoproteota	c__Thermoprotei_A	o__Sulfolobales	f__Sulfolobaceae	g__Saccharolobus	s__Saccharolobus solfataricus	Saccharolobus solfataricus P2	strain=P2
GCA_000007065.1	d__Archaea	p__Halobacteriota	c__Methanosarcinia	o__Methanosarcinales	f__Methanosarcinaceae	g__Methanosarcina	s__Methanosarcina mazei	Methanosarcina mazei Go1	strain=Go1
GCA_000007185.1	d__Archaea	p__Methanobacteriota	c__Methanopyri	o__Methanopyrales	f__Methanopyraceae	g__Methanopyrus	s__Methanopyrus kandleri	Methanopyrus kandleri AV19	strain=AV19
GCA_000007225.1	d__Archaea	p__Thermoproteota	c__Thermoprotei	o__Thermoproteales	f__Thermoproteaceae	g__Pyrobaculum	s__Pyrobaculum aerophilum	Pyrobaculum aerophilum str. IM2	strain=IM2
GCA_000007305.1	d__Archaea	p__Methanobacteriota_B	c__Thermococci	o__Thermococcales	f__Thermococcaceae	g__Pyrococcus	s__Pyrococcus furiosus	Pyrococcus furiosus DSM 3638	strain=DSM 3638
GCA_000007345.1	d__Archaea	p__Halobacteriota	c__Methanosarcinia	o__Methanosarcinales	f__Methanosarcinaceae	g__Methanosarcina	s__Methanosarcina acetivorans	Methanosarcina acetivorans C2A	strain=C2A
GCA_000008085.1	d__Archaea	p__Nanoarchaeota	c__Nanoarchaeia	o__Nanoarchaeales	f__Nanoarchaeaceae	g__Nanoarchaeum	s__Nanoarchaeum equitans	Nanoarchaeum equitans Kin4-M	strain=Kin4-M
GCA_000008265.1	d__Archaea	p__Thermoplasmatota	c__Thermoplasmata	o__Thermoplasmatales	f__Thermoplasmataceae	g__Picrophilus	s__Picrophilus oshimae	Picrophilus oshimae DSM 9789	strain=DSM 9790
GCA_000008645.1	d__Archaea	p__Methanobacteriota	c__Methanobacteria	o__Methanobacteriales	f__Methanothermobacteraceae	g__Methanothermobacter	s__Methanothermobacter thermautotrophicus	Methanothermobacter thermautotrophicus str. Delta H	strain=Delta H
GCA_000008665.1	d__Archaea	p__Halobacteriota	c__Archaeoglobi	o__Archaeoglobales	f__Archaeoglobaceae	g__Archaeoglobus	s__Archaeoglobus fulgidus	Archaeoglobus fulgidus DSM 4304	strain=DSM 4304
GCA_000009185.1	d__Archaea	p__Halobacteriota	c__Halobacteria	o__Halobacteriales	f__Haloferacaceae	g__Haloquadratum	s__Haloquadratum walsbyi	Haloquadratum walsbyi DSM 16790	strain=DSM 16790 = HBSQ001
GCA_000009965.1	d__Archaea	p__Methanobacteriota_B	c__Thermococci	o__Thermococcales	f__Thermococcaceae	g__Thermococcus	s__Thermococcus kodakarensis	Thermococcus kodakarensis KOD1	strain=KOD1
GCA_000011005.1	d__Archaea	p__Halobacteriota	c__Methanocellia	o__Methanocellales	f__Methanocellaceae	g__Methanocella	s__Methanocella paludicola	Methanocella paludicola SANAE	strain=SANAE
GCA_000011085.1	d__Archaea	p__Halobacteriota	c__Halobacteria	o__Halobacteriales	f__Haloarculaceae	g__Haloarcula	s__Haloarcula marismortui	Haloarcula marismortui ATCC 43049	strain=ATCC 43049
GCA_000011105.1	d__Archaea	p__Methanobacteriota_B	c__Thermococci	o__Thermococcales	f__Thermococcaceae	g__Pyrococcus	s__Pyrococcus horikoshii	Pyrococcus horikoshii OT3	strain=OT3
GCA_000011125.1	d__Archaea	p__Thermoproteota	c__Thermoprotei_A	o__Sulfolobales	f__Acidilobaceae	g__Aeropyrum	s__Aeropyrum pernix	Aeropyrum pernix K1	strain=K1
GCA_000011185.1	d__Archaea	p__Thermoplasmatota	c__Thermoplasmata	o__Thermoplasmatales	f__Thermoplasmataceae	g__Thermoplasma	s__Thermoplasma volcanium	Thermoplasma volcanium GSS1	strain=GSS1
GCA_000011205.1	d__Archaea	p__Thermoproteota	c__Thermoprotei_A	o__Sulfolobales	f__Sulfolobaceae	g__Sulfurisphaera	s__Sulfurisphaera tokodaii	Sulfurisphaera tokodaii str. 7	strain=7
GCA_000011585.1	d__Archaea	p__Methanobacteriota	c__Methanococci	o__Methanococcales	f__Methanococcaceae	g__Methanococcus	s__Methanococcus maripaludis	Methanococcus maripaludis S2	strain=S2
GCA_000012285.1	d__Archaea	p__Thermoproteota	c__Thermoprotei_A	o__Sulfolobales	f__Sulfolobaceae	g__Sulfolobus	s__Sulfolobus acidocaldarius	Sulfolobus acidocaldarius DSM 639	strain=DSM 639
GCA_000012545.1	d__Archaea	p__Methanobacteriota	c__Methanobacteria	o__Methanobacteriales	f__Methanobacteriaceae	g__Methanosphaera	s__Methanosphaera stadtmanae	Methanosphaera stadtmanae DSM 3091	strain=DSM 3091
GCA_000013445.1	d__Archaea	p__Halobacteriota	c__Methanomicrobia	o__Methanomicrobiales	f__Methanospirillaceae	g__Methanospirillum	s__Methanospirillum hungatei	Methanospirillum hungatei JF-1	strain=JF-1
GCA_000013725.1	d__Archaea	p__Halobacteriota	c__Methanosarcinia	o__Methanosarcinales	f__Methanosarcinaceae	g__Methanococcoides	s__Methanococcoides burtonii	Methanococcoides burtonii DSM 6242	strain=DSM 6242
GCA_000014945.1	d__Archaea	p__Halobacteriota	c__Methanosarcinia	o__Methanotrichales	f__Methanotrichaceae	g__Methanothrix_B	s__Methanothrix_B thermoacetophila	Methanothrix thermoacetophila PT	strain=PT
GCA_000015145.1	d__Archaea	p__Thermoproteota	c__Thermoprotei_A	o__Sulfolobales	f__Pyrodictiaceae	g__Hyperthermus	s__Hyperthermus butylicus	Hyperthermus butylicus DSM 5456	strain=DSM 5456
GCA_000015205.1	d__Archaea	p__Thermoproteota	c__Thermoprotei	o__Thermoproteales	f__Thermoproteaceae	g__Pyrobaculum	s__Pyrobaculum islandicum	Pyrobaculum islandicum DSM 4184	strain=DSM 4184
GCA_000015225.1	d__Archaea	p__Thermoproteota	c__Thermoprotei	o__Thermofilales	f__Thermofilaceae	g__Thermofilum_B	s__Thermofilum_B pendens	Thermofilum pendens Hrk 5	strain=Hrk 5
GCA_000015765.1	d__Archaea	p__Halobacteriota	c__Methanomicrobia	o__Methanomicrobiales	f__Methanocorpusculaceae	g__Methanocorpusculum	s__Methanocorpusculum labreanum	Methanocorpusculum labreanum Z	strain=Z
GCA_000015805.1	d__Archaea	p__Thermoproteota	c__Thermoprotei	o__Thermoproteales	f__Thermoproteaceae	g__Pyrobaculum	s__Pyrobaculum calidifontis	Pyrobaculum calidifontis JCM 11548	strain=JCM 11548
GCA_000015825.1	d__Archaea	p__Halobacteriota	c__Methanomicrobia	o__Methanomicrobiales	f__Methanoculleaceae	g__Methanoculleus	s__Methanoculleus marisnigri	Methanoculleus marisnigri JR1	strain=JR1
GCA_000015945.1	d__Archaea	p__Thermoproteota	c__Thermoprotei_A	o__Sulfolobales	f__Desulfurococcaceae	g__Staphylothermus	s__Staphylothermus marinus	Staphylothermus marinus F1	strain=F1
GCA_000016125.1	d__Archaea	p__Methanobacteriota	c__Methanococci	o__Methanococcales	f__Methanococcaceae	g__Methanococcus	s__Methanococcus maripaludis_D	Methanococcus maripaludis C5	strain=C5
GCA_000016385.1	d__Archaea	p__Thermoproteota	c__Thermoprotei	o__Thermoproteales	f__Thermoproteaceae	g__Pyrobaculum	s__Pyrobaculum arsenaticum	Pyrobaculum arsenaticum DSM 13514	strain=DSM 13514
GCA_000016525.1	d__Archaea	p__Methanobacteriota	c__Methanobacteria	o__Methanobacteriales	f__Methanobacteriaceae	g__Methanobrevibacter_A	s__Methanobrevibacter_A smithii	Methanobrevibacter smithii ATCC 35061	strain=ATCC 35061; PS; DSMZ 861
GCA_000016605.1	d__Archaea	p__Thermoproteota	c__Thermoprotei_A	o__Sulfolobales	f__Sulfolobaceae	g__Metallosphaera	s__Metallosphaera sedula	Metallosphaera sedula DSM 5348	strain=DSM 5348
GCA_000017165.1	d__Archaea	p__Methanobacteriota	c__Methanococci	o__Methanococcales	f__Methanococcaceae	g__Methanococcus	s__Methanococcus vannielii	Methanococcus vannielii SB	strain=SB
GCA_000017185.1	d__Archaea	p__Methanobacteriota	c__Methanococci	o__Methanococcales	f__Methanococcaceae	g__Methanothermococcus_A	s__Methanothermococcus_A aeolicus	Methanococcus aeolicus Nankai-3	strain=Nankai-3
GCA_000017625.1	d__Archaea	p__Halobacteriota	c__Methanomicrobia	o__Methanomicrobiales	f__Methanoregulaceae	g__Methanoregula	s__Methanoregula boonei	Methanoregula boonei 6A8	strain=6A8
GCA_000017945.1	d__Archaea	p__Thermoproteota	c__Thermoprotei_A	o__Sulfolobales	f__Ignicoccaceae	g__Ignicoccus	s__Ignicoccus hospitalis	Ignicoccus hospitalis KIN4/I	strain=KIN4/I
GCA_000018305.1	d__Archaea	p__Thermoproteota	c__Thermoprotei	o__Thermoproteales	f__Thermocladiaceae	g__Caldivirga	s__Caldivirga maquilingensis	Caldivirga maquilingensis IC-167	strain=IC-167
GCA_000018365.1	d__Archaea	p__Methanobacteriota_B	c__Thermococci	o__Thermococcales	f__Thermococcaceae	g__Thermococcus	s__Thermococcus onnurineus	Thermococcus onnurineus NA1	strain=NA1
GCA_000018465.1	d__Archaea	p__Thermoproteota	c__Nitrososphaeria	o__Nitrososphaerales	f__Nitrosopumilaceae	g__Nitrosopumilus	s__Nitrosopumilus maritimus	Nitrosopumilus maritimus SCM1	strain=SCM1
GCA_000019605.1	d__Archaea	p__Thermoproteota	c__Korarchaeia	o__Korarchaeales	f__Korarchaeaceae	g__Korarchaeum	s__Korarchaeum cryptofilum	Candidatus Korarchaeum cryptofilum OPF8	NA
GCA_000019805.1	d__Archaea	p__Thermoproteota	c__Thermoprotei	o__Thermoproteales	f__Thermoproteaceae	g__Pyrobaculum	s__Pyrobaculum neutrophilum	Pyrobaculum neutrophilum V24Sta	strain=V24Sta
GCA_000020905.1	d__Archaea	p__Thermoproteota	c__Thermoprotei_A	o__Sulfolobales	f__Desulfurococcaceae	g__Desulfurococcus	s__Desulfurococcus amylolyticus	Desulfurococcus amylolyticus 1221n	strain=1221n
GCA_000021965.1	d__Archaea	p__Halobacteriota	c__Methanomicrobia	o__Methanomicrobiales	f__Methanosphaerulaceae	g__Methanosphaerula	s__Methanosphaerula palustris	Methanosphaerula palustris E1-9c	strain=E1-9c
GCA_000022205.1	d__Archaea	p__Halobacteriota	c__Halobacteria	o__Halobacteriales	f__Haloferacaceae	g__Halorubrum	s__Halorubrum lacusprofundi	Halorubrum lacusprofundi ATCC 49239	strain=ATCC 49239
GCA_000022365.1	d__Archaea	p__Methanobacteriota_B	c__Thermococci	o__Thermococcales	f__Thermococcaceae	g__Thermococcus	s__Thermococcus gammatolerans	Thermococcus gammatolerans EJ3	strain=EJ3; DSM 15229
GCA_000022385.1	d__Archaea	p__Thermoproteota	c__Thermoprotei_A	o__Sulfolobales	f__Sulfolobaceae	g__Saccharolobus	s__Saccharolobus islandicus	Sulfolobus islandicus L.S.2.15	strain=L.S.2.15
GCA_000022405.1	d__Archaea	p__Thermoproteota	c__Thermoprotei_A	o__Sulfolobales	f__Sulfolobaceae	g__Saccharolobus	s__Saccharolobus islandicus	Sulfolobus islandicus M.14.25	strain=M.14.25
GCA_000022425.1	d__Archaea	p__Thermoproteota	c__Thermoprotei_A	o__Sulfolobales	f__Sulfolobaceae	g__Saccharolobus	s__Saccharolobus islandicus	Sulfolobus islandicus M.16.27	strain=M.16.27
GCA_000022445.1	d__Archaea	p__Thermoproteota	c__Thermoprotei_A	o__Sulfolobales	f__Sulfolobaceae	g__Saccharolobus	s__Saccharolobus islandicus	Sulfolobus islandicus M.16.4	strain=M.16.4
GCA_000022465.1	d__Archaea	p__Thermoproteota	c__Thermoprotei_A	o__Sulfolobales	f__Sulfolobaceae	g__Saccharolobus	s__Saccharolobus islandicus	Sulfolobus islandicus Y.G.57.14	strain=Y.G.57.14
GCA_000022485.1	d__Archaea	p__Thermoproteota	c__Thermoprotei_A	o__Sulfolobales	f__Sulfolobaceae	g__Saccharolobus	s__Saccharolobus islandicus	Sulfolobus islandicus Y.N.15.51	strain=Y.N.15.51
GCA_000022545.1	d__Archaea	p__Methanobacteriota_B	c__Thermococci	o__Thermococcales	f__Thermococcaceae	g__Thermococcus_A	s__Thermococcus_A sibiricus	Thermococcus sibiricus MM 739	strain=MM 739
GCA_000023945.1	d__Archaea	p__Halobacteriota	c__Halobacteria	o__Halobacteriales	f__Haloarculaceae	g__Halorhabdus	s__Halorhabdus utahensis	Halorhabdus utahensis DSM 12940	strain=DSM 12940
GCA_000023965.1	d__Archaea	p__Halobacteriota	c__Halobacteria	o__Halobacteriales	f__Haloarculaceae	g__Halomicrobium	s__Halomicrobium mukohataei	Halomicrobium mukohataei DSM 12286	strain=DSM 12286
GCA_000023985.1	d__Archaea	p__Methanobacteriota	c__Methanococci	o__Methanococcales	f__Methanocaldococcaceae	g__Methanocaldococcus	s__Methanocaldococcus fervens	Methanocaldococcus fervens AG86	strain=AG86
GCA_000024185.1	d__Archaea	p__Methanobacteriota	c__Methanobacteria	o__Methanobacteriales	f__Methanobacteriaceae	g__Methanobrevibacter	s__Methanobrevibacter ruminantium	Methanobrevibacter ruminantium M1	strain=M1
GCA_000024305.1	d__Archaea	p__Thermoproteota	c__Thermoprotei_A	o__Sulfolobales	f__Sulfolobaceae	g__Saccharolobus	s__Saccharolobus islandicus	Sulfolobus islandicus L.D.8.5	strain=L.D.8.5
GCA_000024625.1	d__Archaea	p__Methanobacteriota	c__Methanococci	o__Methanococcales	f__Methanocaldococcaceae	g__Methanocaldococcus	s__Methanocaldococcus vulcanius	Methanocaldococcus vulcanius M7	strain=M7
GCA_000025285.1	d__Archaea	p__Halobacteriota	c__Archaeoglobi	o__Archaeoglobales	f__Archaeoglobaceae	g__Archaeoglobus_B	s__Archaeoglobus_B profundus	Archaeoglobus profundus DSM 5631	strain=DSM 5631
GCA_000025325.1	d__Archaea	p__Halobacteriota	c__Halobacteria	o__Halobacteriales	f__Natrialbaceae	g__Haloterrigena	s__Haloterrigena turkmenica	Haloterrigena turkmenica DSM 5511	strain=DSM 5511
GCA_000025505.1	d__Archaea	p__Halobacteriota	c__Archaeoglobi	o__Archaeoglobales	f__Archaeoglobaceae	g__Ferroglobus	s__Ferroglobus placidus	Ferroglobus placidus DSM 10642	strain=DSM 10642
GCA_000025525.1	d__Archaea	p__Methanobacteriota	c__Methanococci	o__Methanococcales	f__Methanocaldococcaceae	g__Methanocaldococcus	s__Methanocaldococcus sp000025525	Methanocaldococcus sp. FS406-22	strain=FS406-22
GCA_000025625.1	d__Archaea	p__Halobacteriota	c__Halobacteria	o__Halobacteriales	f__Natrialbaceae	g__Natrialba	s__Natrialba magadii	Natrialba magadii ATCC 43099	strain=ATCC 43099
GCA_000025665.1	d__Archaea	p__Thermoplasmatota	c__Thermoplasmata	o__Aciduliprofundales	f__Aciduliprofundaceae	g__Aciduliprofundum	s__Aciduliprofundum boonei	Aciduliprofundum boonei T469	strain=T469
GCA_000025685.1	d__Archaea	p__Halobacteriota	c__Halobacteria	o__Halobacteriales	f__Haloferacaceae	g__Haloferax	s__Haloferax volcanii	Haloferax volcanii DS2	strain=DS2
GCA_000025865.1	d__Archaea	p__Halobacteriota	c__Methanosarcinia	o__Methanosarcinales	f__Methanosarcinaceae	g__Methanohalophilus	s__Methanohalophilus mahii	Methanohalophilus mahii DSM 5219	strain=DSM 5219
GCA_000026045.1	d__Archaea	p__Halobacteriota	c__Halobacteria	o__Halobacteriales	f__Haloarculaceae	g__Natronomonas	s__Natronomonas pharaonis	Natronomonas pharaonis DSM 2160	strain=Gabara
GCA_000063445.1	d__Archaea	p__Halobacteriota	c__Methanocellia	o__Methanocellales	f__Methanocellaceae	g__Methanocella_A	s__Methanocella_A arvoryzae	Methanocella arvoryzae MRE50	strain=MRE50
GCA_000069025.1	d__Archaea	p__Halobacteriota	c__Halobacteria	o__Halobacteriales	f__Halobacteriaceae	g__Halobacterium	s__Halobacterium salinarum	Halobacterium salinarum R1	strain=DSM 671 = R1
GCA_000091665.1	d__Archaea	p__Methanobacteriota	c__Methanococci	o__Methanococcales	f__Methanocaldococcaceae	g__Methanocaldococcus	s__Methanocaldococcus jannaschii	Methanocaldococcus jannaschii DSM 2661	strain=DSM 2661
GCA_000092185.1	d__Archaea	p__Thermoproteota	c__Thermoprotei_A	o__Sulfolobales	f__Desulfurococcaceae	g__Thermosphaera	s__Thermosphaera aggregans	Thermosphaera aggregans DSM 11486	strain=DSM 11486
GCA_000092305.1	d__Archaea	p__Methanobacteriota	c__Methanococci	o__Methanococcales	f__Methanocaldococcaceae	g__Methanocaldococcus_A	s__Methanocaldococcus_A infernus	Methanocaldococcus infernus ME	strain=ME
GCA_000092465.1	d__Archaea	p__Thermoproteota	c__Thermoprotei_A	o__Sulfolobales	f__Desulfurococcaceae	g__Staphylothermus	s__Staphylothermus hellenicus	Staphylothermus hellenicus DSM 12710	strain=DSM 12710
GCA_000144915.1	d__Archaea	p__Thermoproteota	c__Thermoprotei_A	o__Sulfolobales	f__Acidilobaceae	g__Acidilobus	s__Acidilobus saccharovorans	Acidilobus saccharovorans 345-15	strain=345-15
GCA_000145295.1	d__Archaea	p__Methanobacteriota	c__Methanobacteria	o__Methanobacteriales	f__Methanothermobacteraceae	g__Methanothermobacter	s__Methanothermobacter marburgensis	Methanothermobacter marburgensis str. Marburg	strain=Marburg
GCA_000145985.1	d__Archaea	p__Thermoproteota	c__Thermoprotei_A	o__Sulfolobales	f__Ignisphaeraceae	g__Ignisphaera	s__Ignisphaera aggregans	Ignisphaera aggregans DSM 17230	strain=DSM 17230
GCA_000147875.1	d__Archaea	p__Halobacteriota	c__Methanomicrobia	o__Methanomicrobiales	f__Methanomicrobiaceae	g__Methanolacinia	s__Methanolacinia petrolearia	Methanolacinia petrolearia DSM 11571	strain=DSM 11571
GCA_000148385.1	d__Archaea	p__Thermoproteota	c__Thermoprotei	o__Thermoproteales	f__Thermocladiaceae	g__Vulcanisaeta	s__Vulcanisaeta distributa	Vulcanisaeta distributa DSM 14429	strain=DSM 14429
GCA_000151105.2	d__Archaea	p__Methanobacteriota_B	c__Thermococci	o__Thermococcales	f__Thermococcaceae	g__Thermococcus_B	s__Thermococcus_B barophilus	Thermococcus barophilus MP	strain=MP
GCA_000151205.2	d__Archaea	p__Methanobacteriota_B	c__Thermococci	o__Thermococcales	f__Thermococcaceae	g__Thermococcus	s__Thermococcus sp000151205	Thermococcus sp. AM4	strain=AM4
GCA_000151225.1	d__Archaea	p__Methanobacteriota	c__Methanobacteria	o__Methanobacteriales	f__Methanobacteriaceae	g__Methanobrevibacter_A	s__Methanobrevibacter_A smithii	Methanobrevibacter smithii DSM 2374	strain=DSM 2374
GCA_000151245.1	d__Archaea	p__Methanobacteriota	c__Methanobacteria	o__Methanobacteriales	f__Methanobacteriaceae	g__Methanobrevibacter_A	s__Methanobrevibacter_A smithii	Methanobrevibacter smithii DSM 2375	strain=DSM 2375
GCA_000152265.2	d__Archaea	p__Thermoplasmatota	c__Thermoplasmata	o__Thermoplasmatales	f__Thermoplasmataceae	g__Ferroplasma	s__Ferroplasma acidarmanus	Ferroplasma acidarmanus Fer1	strain=Fer1
GCA_000166095.1	d__Archaea	p__Methanobacteriota	c__Methanobacteria	o__Methanobacteriales	f__Methanothermaceae	g__Methanothermus	s__Methanothermus fervidus	Methanothermus fervidus DSM 2088	strain=DSM 2088
GCA_000172995.2	d__Archaea	p__Halobacteriota	c__Halobacteria	o__Halobacteriales	f__Haloferacaceae	g__Halogeometricum	s__Halogeometricum borinquense	Halogeometricum borinquense DSM 11551	strain=PR 3
GCA_000175555.1	d__Archaea	p__Thermoproteota	c__Thermoprotei_A	o__Sulfolobales	f__Sulfolobaceae	g__Saccharolobus	s__Saccharolobus solfataricus	Saccharolobus solfataricus 98/2	strain=98/2
GCA_000179575.2	d__Archaea	p__Methanobacteriota	c__Methanococci	o__Methanococcales	f__Methanococcaceae	g__Methanothermococcus_A	s__Methanothermococcus_A okinawensis	Methanothermococcus okinawensis IH1	strain=IH1
GCA_000186365.1	d__Archaea	p__Thermoproteota	c__Thermoprotei_A	o__Sulfolobales	f__Desulfurococcaceae	g__Desulfurococcus	s__Desulfurococcus mucosus	Desulfurococcus mucosus DSM 2162	strain=DSM 2162
GCA_000187225.2	d__Archaea	p__Halobacteriota	c__Halobacteria	o__Halobacteriales	f__Haladaptataceae	g__Haladaptatus	s__Haladaptatus paucihalophilus	Haladaptatus paucihalophilus DX253	strain=DX253
GCA_000189555.1	d__Archaea	p__Thermoproteota	c__Thermoprotei_A	o__Sulfolobales	f__Sulfolobaceae	g__Saccharolobus	s__Saccharolobus islandicus	Sulfolobus islandicus REY15A	strain=REY15A
GCA_000189575.1	d__Archaea	p__Thermoproteota	c__Thermoprotei_A	o__Sulfolobales	f__Sulfolobaceae	g__Saccharolobus	s__Saccharolobus islandicus	Sulfolobus islandicus HVE10/4	strain=HVE10/4
GCA_000189795.2	d__Archaea	p__Methanobacteriota	c__Methanobacteria	o__Methanobacteriales	f__Methanobacteriaceae	g__Methanobrevibacter_A	s__Methanobrevibacter_A smithii	Methanobrevibacter smithii TS145A	strain=TS145A
GCA_000189815.2	d__Archaea	p__Methanobacteriota	c__Methanobacteria	o__Methanobacteriales	f__Methanobacteriaceae	g__Methanobrevibacter_A	s__Methanobrevibacter_A smithii	Methanobrevibacter smithii TS145B	strain=TS145B
GCA_000189835.2	d__Archaea	p__Methanobacteriota	c__Methanobacteria	o__Methanobacteriales	f__Methanobacteriaceae	g__Methanobrevibacter_A	s__Methanobrevibacter_A smithii	Methanobrevibacter smithii TS146A	strain=TS146A
GCA_000189855.2	d__Archaea	p__Methanobacteriota	c__Methanobacteria	o__Methanobacteriales	f__Methanobacteriaceae	g__Methanobrevibacter_A	s__Methanobrevibacter_A smithii	Methanobrevibacter smithii TS146B	strain=TS146B
GCA_000189875.2	d__Archaea	p__Methanobacteriota	c__Methanobacteria	o__Methanobacteriales	f__Methanobacteriaceae	g__Methanobrevibacter_A	s__Methanobrevibacter_A smithii	Methanobrevibacter smithii TS146C	strain=TS146C
GCA_000189895.2	d__Archaea	p__Methanobacteriota	c__Methanobacteria	o__Methanobacteriales	f__Methanobacteriaceae	g__Methanobrevibacter_A	s__Methanobrevibacter_A smithii	Methanobrevibacter smithii TS146D	strain=TS146D
GCA_000189915.2	d__Archaea	p__Methanobacteriota	c__Methanobacteria	o__Methanobacteriales	f__Methanobacteriaceae	g__Methanobrevibacter_A	s__Methanobrevibacter_A smithii_A	Methanobrevibacter smithii TS146E	strain=TS146E
GCA_000189935.2	d__Archaea	p__Methanobacteriota	c__Methanobacteria	o__Methanobacteriales	f__Methanobacteriaceae	g__Methanobrevibacter_A	s__Methanobrevibacter_A smithii_A	Methanobrevibacter smithii TS147A	strain=TS147A
GCA_000189955.2	d__Archaea	p__Methanobacteriota	c__Methanobacteria	o__Methanobacteriales	f__Methanobacteriaceae	g__Methanobrevibacter_A	s__Methanobrevibacter_A smithii_A	Methanobrevibacter smithii TS147B	strain=TS147B
GCA_000189975.2	d__Archaea	p__Methanobacteriota	c__Methanobacteria	o__Methanobacteriales	f__Methanobacteriaceae	g__Methanobrevibacter_A	s__Methanobrevibacter_A smithii_A	Methanobrevibacter smithii TS147C	strain=TS147C
GCA_000189995.2	d__Archaea	p__Methanobacteriota	c__Methanobacteria	o__Methanobacteriales	f__Methanobacteriaceae	g__Methanobrevibacter_A	s__Methanobrevibacter_A smithii_A	Methanobrevibacter smithii TS94A	strain=TS94A
GCA_000190015.2	d__Archaea	p__Methanobacteriota	c__Methanobacteria	o__Methanobacteriales	f__Methanobacteriaceae	g__Methanobrevibacter_A	s__Methanobrevibacter_A smithii_A	Methanobrevibacter smithii TS94B	strain=TS94B
GCA_000190035.2	d__Archaea	p__Methanobacteriota	c__Methanobacteria	o__Methanobacteriales	f__Methanobacteriaceae	g__Methanobrevibacter_A	s__Methanobrevibacter_A smithii_A	Methanobrevibacter smithii TS94C	strain=TS94C
GCA_000190055.2	d__Archaea	p__Methanobacteriota	c__Methanobacteria	o__Methanobacteriales	f__Methanobacteriaceae	g__Methanobrevibacter_A	s__Methanobrevibacter_A smithii_A	Methanobrevibacter smithii TS95A	strain=TS95A
GCA_000190075.2	d__Archaea	p__Methanobacteriota	c__Methanobacteria	o__Methanobacteriales	f__Methanobacteriaceae	g__Methanobrevibacter_A	s__Methanobrevibacter_A smithii_A	Methanobrevibacter smithii TS95B	strain=TS95B
GCA_000190095.2	d__Archaea	p__Methanobacteriota	c__Methanobacteria	o__Methanobacteriales	f__Methanobacteriaceae	g__Methanobrevibacter_A	s__Methanobrevibacter_A smithii_A	Methanobrevibacter smithii TS95C	strain=TS95C
GCA_000190115.2	d__Archaea	p__Methanobacteriota	c__Methanobacteria	o__Methanobacteriales	f__Methanobacteriaceae	g__Methanobrevibacter_A	s__Methanobrevibacter_A smithii_A	Methanobrevibacter smithii TS95D	strain=TS95D
GCA_000190135.2	d__Archaea	p__Methanobacteriota	c__Methanobacteria	o__Methanobacteriales	f__Methanobacteriaceae	g__Methanobrevibacter_A	s__Methanobrevibacter_A smithii_A	Methanobrevibacter smithii TS96A	strain=TS96A
GCA_000190155.2	d__Archaea	p__Methanobacteriota	c__Methanobacteria	o__Methanobacteriales	f__Methanobacteriaceae	g__Methanobrevibacter_A	s__Methanobrevibacter_A smithii_A	Methanobrevibacter smithii TS96B	strain=TS96B
GCA_000190175.2	d__Archaea	p__Methanobacteriota	c__Methanobacteria	o__Methanobacteriales	f__Methanobacteriaceae	g__Methanobrevibacter_A	s__Methanobrevibacter_A smithii	Methanobrevibacter smithii TS96C	strain=TS96C
GCA_000190315.1	d__Archaea	p__Thermoproteota	c__Thermoprotei	o__Thermoproteales	f__Thermocladiaceae	g__Vulcanisaeta	s__Vulcanisaeta moutnovskia	Vulcanisaeta moutnovskia 768-28	strain=768-28
GCA_000191585.1	d__Archaea	p__Methanobacteriota	c__Methanobacteria	o__Methanobacteriales	f__Methanobacteriaceae	g__Methanobacterium_B	s__Methanobacterium_B lacus	Methanobacterium lacus	strain=AL-21
GCA_000193375.1	d__Archaea	p__Thermoproteota	c__Thermoprotei	o__Thermoproteales	f__Thermoproteaceae	g__Thermoproteus	s__Thermoproteus uzoniensis	Thermoproteus uzoniensis 768-20	strain=768-20
GCA_000194625.1	d__Archaea	p__Halobacteriota	c__Archaeoglobi	o__Archaeoglobales	f__Archaeoglobaceae	g__Archaeoglobus_C	s__Archaeoglobus_C veneficus	Archaeoglobus veneficus SNP6	strain=SNP6
GCA_000195915.1	d__Archaea	p__Thermoplasmatota	c__Thermoplasmata	o__Thermoplasmatales	f__Thermoplasmataceae	g__Thermoplasma	s__Thermoplasma acidophilum	Thermoplasma acidophilum DSM 1728	strain=DSM1728
GCA_000195935.2	d__Archaea	p__Methanobacteriota_B	c__Thermococci	o__Thermococcales	f__Thermococcaceae	g__Pyrococcus	s__Pyrococcus abyssi	Pyrococcus abyssi GE5	strain=Orsay
GCA_000196655.1	d__Archaea	p__Halobacteriota	c__Methanosarcinia	o__Methanosarcinales	f__Methanosarcinaceae	g__Methanohalobium	s__Methanohalobium evestigatum	Methanohalobium evestigatum Z-7303	strain=Z-7303
GCA_000196895.1	d__Archaea	p__Halobacteriota	c__Halobacteria	o__Halobacteriales	f__Halalkalicoccaceae	g__Halalkalicoccus	s__Halalkalicoccus jeotgali	Halalkalicoccus jeotgali B3	strain=B3
GCA_000200715.1	d__Archaea	p__Thermoproteota	c__Nitrososphaeria	o__Nitrososphaerales	f__Nitrosopumilaceae	g__Cenarchaeum	s__Cenarchaeum symbiosum	Cenarchaeum symbiosum A	NA
GCA_000204415.1	d__Archaea	p__Halobacteriota	c__Methanosarcinia	o__Methanotrichales	f__Methanotrichaceae	g__Methanothrix	s__Methanothrix soehngenii	Methanothrix soehngenii GP6	strain=GP6
GCA_000204585.1	d__Archaea	p__Thermoproteota	c__Nitrososphaeria	o__Nitrososphaerales	f__Nitrosopumilaceae	g__Nitrosarchaeum	s__Nitrosarchaeum limnae	Candidatus Nitrosarchaeum limnium SFB1	strain=SFB1
GCA_000204925.1	d__Archaea	p__Thermoproteota	c__Thermoprotei_A	o__Sulfolobales	f__Sulfolobaceae	g__Metallosphaera	s__Metallosphaera cuprina	Metallosphaera cuprina Ar-4	strain=Ar-4
GCA_000211475.1	d__Archaea	p__Methanobacteriota_B	c__Thermococci	o__Thermococcales	f__Thermococcaceae	g__Pyrococcus	s__Pyrococcus sp000211475	Pyrococcus sp. NA2	strain=NA2
GCA_000213215.1	d__Archaea	p__Thermoproteota	c__Thermoprotei_A	o__Sulfolobales	f__Sulfolobaceae	g__Acidianus	s__Acidianus hospitalis	Acidianus hospitalis W1	strain=W1
GCA_000214415.1	d__Archaea	p__Methanobacteriota	c__Methanococci	o__Methanococcales	f__Methanococcaceae	g__Methanotorris	s__Methanotorris igneus	Methanotorris igneus Kol 5	strain=Kol 5
GCA_000214725.1	d__Archaea	p__Methanobacteriota	c__Methanobacteria	o__Methanobacteriales	f__Methanobacteriaceae	g__Methanobacterium_C	s__Methanobacterium_C paludis	Methanobacterium paludis	strain=SWAN1
GCA_000215915.3	d__Archaea	p__Halobacteriota	c__Halobacteria	o__Halobacteriales	f__Haloarculaceae	g__Halorhabdus	s__Halorhabdus tiamatea	Halorhabdus tiamatea SARL4B	strain=SARL4B
GCA_000215995.1	d__Archaea	p__Methanobacteriota_B	c__Thermococci	o__Thermococcales	f__Thermococcaceae	g__Pyrococcus	s__Pyrococcus yayanosii	Pyrococcus yayanosii CH1	strain=CH1
GCA_000217715.1	d__Archaea	p__Halobacteriota	c__Halobacteria	o__Halobacteriales	f__Natrialbaceae	g__Halopiger	s__Halopiger xanaduensis	Halopiger xanaduensis SH-6	strain=SH-6
GCA_000217995.1	d__Archaea	p__Halobacteriota	c__Methanosarcinia	o__Methanosarcinales	f__Methanosarcinaceae	g__Methanosalsum	s__Methanosalsum zhilinae	Methanosalsum zhilinae DSM 4017	strain=DSM 4017
GCA_000220175.2	d__Archaea	p__Thermoproteota	c__Nitrososphaeria	o__Nitrososphaerales	f__Nitrosopumilaceae	g__Nitrosarchaeum	s__Nitrosarchaeum koreense	Nitrosarchaeum koreense MY1	strain=MY1
GCA_000220355.1	d__Archaea	p__Nanohaloarchaeota	c__Nanosalinia	o__Nanosalinales	f__Nanosalinaceae	g__Nanosalinarum	s__Nanosalinarum sp000220355	Candidatus Nanosalinarum sp. J07AB56	NA
GCA_000220375.1	d__Archaea	p__Nanohaloarchaeota	c__Nanosalinia	o__Nanosalinales	f__Nanosalinaceae	g__Nanosalina	s__Nanosalina sp000220375	Candidatus Nanosalina sp. J07AB43	NA
GCA_000220645.1	d__Archaea	p__Methanobacteriota	c__Methanococci	o__Methanococcales	f__Methanococcaceae	g__Methanococcus	s__Methanococcus maripaludis	Methanococcus maripaludis X1	strain=X1
GCA_000221185.1	d__Archaea	p__Methanobacteriota_B	c__Thermococci	o__Thermococcales	f__Thermococcaceae	g__Thermococcus	s__Thermococcus sp000221185	Thermococcus sp. 4557	strain=4557
GCA_000223395.1	d__Archaea	p__Thermoproteota	c__Thermoprotei_A	o__Sulfolobales	f__Pyrodictiaceae	g__Pyrolobus	s__Pyrolobus fumarii	Pyrolobus fumarii 1A	strain=1A
GCA_000223905.1	d__Archaea	p__Halobacteriota	c__Halobacteria	o__Halobacteriales	f__Haloarculaceae	g__Haloarcula	s__Haloarcula hispanica	Haloarcula hispanica ATCC 33960	strain=CGMCC 1.2049
GCA_000224475.1	d__Archaea	p__Halobacteriota	c__Halobacteria	o__Halobacteriales	f__Haloferacaceae	g__Halolamina	s__Halolamina sp000224475	halophilic archaeon DL31	strain=DL31
GCA_000226975.3	d__Archaea	p__Halobacteriota	c__Halobacteria	o__Halobacteriales	f__Natrialbaceae	g__Halobiforma	s__Halobiforma lacisalsi	Halobiforma lacisalsi AJ5	strain=AJ5
GCA_000230715.3	d__Archaea	p__Halobacteriota	c__Halobacteria	o__Halobacteriales	f__Natrialbaceae	g__Natronobacterium	s__Natronobacterium gregoryi	Natronobacterium gregoryi SP2	strain=SP2
GCA_000230735.3	d__Archaea	p__Halobacteriota	c__Halobacteria	o__Halobacteriales	f__Natrialbaceae	g__Natrinema	s__Natrinema pellirubrum	Natrinema pellirubrum DSM 15624	strain=DSM 15624
GCA_000230955.3	d__Archaea	p__Halobacteriota	c__Halobacteria	o__Halobacteriales	f__Halobacteriaceae	g__Halobacterium	s__Halobacterium sp000230955	Halobacterium sp. DL1	strain=DL1
GCA_000231015.3	d__Archaea	p__Thermoproteota	c__Thermoprotei_A	o__Sulfolobales	f__Desulfurococcaceae	g__Desulfurococcus	s__Desulfurococcus amylolyticus	Desulfurococcus amylolyticus DSM 16532	strain=DSM 16532
GCA_000234805.1	d__Archaea	p__Thermoproteota	c__Thermoprotei	o__Thermoproteales	f__Thermoproteaceae	g__Pyrobaculum	s__Pyrobaculum ferrireducens	Pyrobaculum ferrireducens	strain=1860
GCA_000235565.1	d__Archaea	p__Halobacteriota	c__Methanosarcinia	o__Methanotrichales	f__Methanotrichaceae	g__Methanothrix_A	s__Methanothrix_A harundinacea_E	Methanothrix harundinacea 6Ac	strain=6Ac
GCA_000237865.1	d__Archaea	p__Halobacteriota	c__Halobacteria	o__Halobacteriales	f__Haloferacaceae	g__Haloquadratum	s__Haloquadratum walsbyi	Haloquadratum walsbyi C23	strain=DSM 16854 = C23
GCA_000241145.2	d__Archaea	p__Thermoproteota	c__Nitrososphaeria	o__Nitrososphaerales	f__Nitrosopumilaceae	g__Nitrosarchaeum	s__Nitrosarchaeum limnae	Candidatus Nitrosarchaeum limnium BG20	strain=BG20
GCA_000242875.3	d__Archaea	p__Thermoproteota	c__Nitrososphaeria	o__Nitrososphaerales	f__Nitrosopumilaceae	g__Nitrosopumilus	s__Nitrosopumilus salaria	Candidatus Nitrosopumilus salaria BD31	strain=BD31
GCA_000243255.1	d__Archaea	p__Halobacteriota	c__Methanomicrobia	o__Methanomicrobiales	f__Methanomicrobiaceae	g__Methanoplanus	s__Methanoplanus limicola	Methanoplanus limicola DSM 2279	strain=DSM 2279
GCA_000243315.1	d__Archaea	p__Thermoproteota	c__Thermoprotei_A	o__Sulfolobales	f__Sulfolobaceae	g__Metallosphaera	s__Metallosphaera yellowstonensis	Metallosphaera yellowstonensis MK1	strain=MK1
GCA_000243455.2	d__Archaea	p__Methanobacteriota	c__Methanococci	o__Methanococcales	f__Methanococcaceae	g__Methanotorris	s__Methanotorris formicicus	Methanotorris formicicus Mc-S-70	strain=Mc-S-70
GCA_000245095.2	d__Archaea	p__Thermoproteota	c__Thermoprotei_A	o__Sulfolobales	f__Sulfolobaceae	g__Saccharolobus	s__Saccharolobus islandicus	Sulfolobus islandicus M.16.2	strain=M.16.2
GCA_000245115.2	d__Archaea	p__Thermoproteota	c__Thermoprotei_A	o__Sulfolobales	f__Sulfolobaceae	g__Saccharolobus	s__Saccharolobus islandicus	Sulfolobus islandicus M.16.12	strain=M.16.12
GCA_000245135.2	d__Archaea	p__Thermoproteota	c__Thermoprotei_A	o__Sulfolobales	f__Sulfolobaceae	g__Saccharolobus	s__Saccharolobus islandicus	Sulfolobus islandicus M.16.13	strain=M.16.13
GCA_000245155.2	d__Archaea	p__Thermoproteota	c__Thermoprotei_A	o__Sulfolobales	f__Sulfolobaceae	g__Saccharolobus	s__Saccharolobus islandicus	Sulfolobus islandicus M.16.22	strain=M.16.22
GCA_000245175.2	d__Archaea	p__Thermoproteota	c__Thermoprotei_A	o__Sulfolobales	f__Sulfolobaceae	g__Saccharolobus	s__Saccharolobus islandicus	Sulfolobus islandicus M.16.23	strain=M.16.23
GCA_000245195.2	d__Archaea	p__Thermoproteota	c__Thermoprotei_A	o__Sulfolobales	f__Sulfolobaceae	g__Saccharolobus	s__Saccharolobus islandicus	Sulfolobus islandicus M.16.30	strain=M.16.30
GCA_000245215.2	d__Archaea	p__Thermoproteota	c__Thermoprotei_A	o__Sulfolobales	f__Sulfolobaceae	g__Saccharolobus	s__Saccharolobus islandicus	Sulfolobus islandicus M.16.40	strain=M.16.40
GCA_000245235.2	d__Archaea	p__Thermoproteota	c__Thermoprotei_A	o__Sulfolobales	f__Sulfolobaceae	g__Saccharolobus	s__Saccharolobus islandicus	Sulfolobus islandicus M.16.43	strain=M.16.43
GCA_000245255.2	d__Archaea	p__Thermoproteota	c__Thermoprotei_A	o__Sulfolobales	f__Sulfolobaceae	g__Saccharolobus	s__Saccharolobus islandicus	Sulfolobus islandicus M.16.46	strain=M.16.46
GCA_000245275.2	d__Archaea	p__Thermoproteota	c__Thermoprotei_A	o__Sulfolobales	f__Sulfolobaceae	g__Saccharolobus	s__Saccharolobus islandicus	Sulfolobus islandicus M.16.47	strain=M.16.47
GCA_000246735.1	d__Archaea	p__Thermoplasmatota	c__Poseidoniia	o__Poseidoniales	f__Poseidoniaceae	g__MGIIa-L1	s__MGIIa-L1 sp000246735	uncultured Candidatus Poseidoniales archaeon	NA
GCA_000246985.3	d__Archaea	p__Methanobacteriota_B	c__Thermococci	o__Thermococcales	f__Thermococcaceae	g__Thermococcus_A	s__Thermococcus_A alcaliphilus	Thermococcus litoralis DSM 5473	strain=DSM 5473
GCA_000247545.1	d__Archaea	p__Thermoproteota	c__Thermoprotei	o__Thermoproteales	f__Thermoproteaceae	g__Pyrobaculum	s__Pyrobaculum oguniense	Pyrobaculum oguniense TE7	strain=TE7
GCA_000251105.1	d__Archaea	p__Halobacteriota	c__Methanocellia	o__Methanocellales	f__Methanocellaceae	g__Methanocella	s__Methanocella conradii	Methanocella conradii HZ254	strain=HZ254
GCA_000253055.1	d__Archaea	p__Thermoproteota	c__Thermoprotei	o__Thermoproteales	f__Thermoproteaceae	g__Thermoproteus	s__Thermoproteus tenax	Thermoproteus tenax Kra 1	strain=Kra 1
GCA_000258425.1	d__Archaea	p__Thermoproteota	c__Thermoprotei_A	o__Sulfolobales	f__Fervidicoccaceae	g__Fervidicoccus	s__Fervidicoccus fontis	Fervidicoccus fontis Kam940	strain=Kam940
GCA_000258515.1	d__Archaea	p__Methanobacteriota_B	c__Thermococci	o__Thermococcales	f__Thermococcaceae	g__Thermococcus	s__Thermococcus zilligii	Thermococcus zilligii AN1	strain=AN1
GCA_000259215.1	d__Archaea	p__Halobacteriota	c__Halobacteria	o__Halobacteriales	f__Halococcaceae	g__Halococcus	s__Halococcus hamelinensis	Halococcus hamelinensis 100A6	strain=100A6
GCA_000263735.1	d__Archaea	p__Methanobacteriota_B	c__Thermococci	o__Thermococcales	f__Thermococcaceae	g__Pyrococcus	s__Pyrococcus sp000263735	Pyrococcus sp. ST04	strain=ST04
GCA_000264495.1	d__Archaea	p__Thermoproteota	c__Thermoprotei_A	o__Sulfolobales	f__Desulfurococcaceae	g__Thermogladius	s__Thermogladius calderae	Thermogladius calderae 1633	strain=1633
GCA_000265525.1	d__Archaea	p__Methanobacteriota_B	c__Thermococci	o__Thermococcales	f__Thermococcaceae	g__Thermococcus	s__Thermococcus cleftensis	Thermococcus cleftensis	strain=CL1
GCA_000270325.1	d__Archaea	p__Thermoproteota	c__Nitrososphaeria_A	o__Caldarchaeales	f__Caldarchaeaceae	g__Caldarchaeum	s__Caldarchaeum subterraneum_A	Candidatus Caldarchaeum subterraneum	NA
GCA_000275605.1	d__Archaea	p__Methanobacteriota_B	c__Thermococci	o__Thermococcales	f__Thermococcaceae	g__Pyrococcus	s__Pyrococcus furiosus	Pyrococcus furiosus COM1	strain=COM1
GCA_000275865.1	d__Archaea	p__Halobacteriota	c__Methanomicrobia	o__Methanomicrobiales	f__Methanofollaceae	g__Methanofollis	s__Methanofollis liminatans	Methanofollis liminatans DSM 4140	strain=DSM 4140
GCA_000281695.1	d__Archaea	p__Halobacteriota	c__Halobacteria	o__Halobacteriales	f__Natrialbaceae	g__Natrinema	s__Natrinema gari	Natrinema sp. J7-2	strain=J7-2
GCA_000283335.1	d__Archaea	p__Halobacteriota	c__Halobacteria	o__Halobacteriales	f__Haloferacaceae	g__Halogranum	s__Halogranum rubrum	Halogranum salarium B-1	strain=B-1
GCA_000296615.1	d__Archaea	p__Halobacteriota	c__Halobacteria	o__Halobacteriales	f__Haloferacaceae	g__Halorubrum	s__Halorubrum sp000296615	Halorubrum sp. T3	strain=T3
GCA_000299365.1	d__Archaea	p__Thermoproteota	c__Nitrososphaeria	o__Nitrososphaerales	f__Nitrosopumilaceae	g__Nitrosopumilus	s__Nitrosopumilus koreensis	Candidatus Nitrosopumilus koreensis AR1	strain=AR1
GCA_000299395.1	d__Archaea	p__Thermoproteota	c__Nitrososphaeria	o__Nitrososphaerales	f__Nitrosopumilaceae	g__Nitrosopumilus	s__Nitrosopumilus sediminis	Candidatus Nitrosopumilus sediminis	strain=AR2
GCA_000300255.2	d__Archaea	p__Thermoplasmatota	c__Thermoplasmata	o__Methanomassiliicoccales	f__Methanomethylophilaceae	g__Methanomethylophilus	s__Methanomethylophilus alvus	Candidatus Methanomethylophilus alvus Mx1201	strain=Mx1201
GCA_000302455.1	d__Archaea	p__Methanobacteriota	c__Methanobacteria	o__Methanobacteriales	f__Methanobacteriaceae	g__Methanobacterium	s__Methanobacterium formicicum_A	Methanobacterium formicicum DSM 3637	strain=DSM 3637
GCA_000303155.1	d__Archaea	p__Thermoproteota	c__Nitrososphaeria	o__Nitrososphaerales	f__Nitrososphaeraceae	g__Nitrososphaera	s__Nitrososphaera gargensis	Candidatus Nitrososphaera gargensis Ga9.2	NA
GCA_000304355.2	d__Archaea	p__Halobacteriota	c__Methanomicrobia	o__Methanomicrobiales	f__Methanoculleaceae	g__Methanoculleus	s__Methanoculleus bourgensis	Methanoculleus bourgensis MS2	strain=MS2T
GCA_000306725.1	d__Archaea	p__Halobacteriota	c__Methanosarcinia	o__Methanosarcinales	f__Methanosarcinaceae	g__Methanolobus	s__Methanolobus psychrophilus	Methanolobus psychrophilus R15	strain=R15
GCA_000306765.2	d__Archaea	p__Halobacteriota	c__Halobacteria	o__Halobacteriales	f__Haloferacaceae	g__Haloferax	s__Haloferax mediterranei	Haloferax mediterranei ATCC 33500	strain=CGMCC 1.2087
GCA_000308215.1	d__Archaea	p__Thermoplasmatota	c__Thermoplasmata	o__Methanomassiliicoccales	f__Methanomassiliicoccaceae	g__Methanomassiliicoccus	s__Methanomassiliicoccus luminyensis	Methanomassiliicoccus luminyensis B10	strain=B10
GCA_000309865.1	d__Archaea	p__Methanobacteriota	c__Methanobacteria	o__Methanobacteriales	f__Methanobacteriaceae	g__Methanobacterium	s__Methanobacterium sp000309865	Methanobacterium sp. Maddingley MBC34	NA
GCA_000317795.1	d__Archaea	p__Thermoproteota	c__Thermoprotei_A	o__Sulfolobales	f__Acidilobaceae	g__Caldisphaera	s__Caldisphaera lagunensis	Caldisphaera lagunensis DSM 15908	strain=DSM 15908
GCA_000320505.2	d__Archaea	p__Methanobacteriota	c__Methanobacteria	o__Methanobacteriales	f__Methanobacteriaceae	g__Methanobrevibacter_B	s__Methanobrevibacter_B boviskoreani	Methanobrevibacter boviskoreani JH1	strain=JH1
GCA_000327485.1	d__Archaea	p__Halobacteriota	c__Methanomicrobia	o__Methanomicrobiales	f__Methanoregulaceae	g__Methanoregula	s__Methanoregula formicica	Methanoregula formicica SMSP	strain=SMSP
GCA_000328285.1	d__Archaea	p__Halobacteriota	c__Halobacteria	o__Halobacteriales	f__Haloferacaceae	g__Haloferax	s__Haloferax volcanii	Haloferax sp. BAB-2207	strain=BAB-2207
GCA_000328525.1	d__Archaea	p__Halobacteriota	c__Halobacteria	o__Halobacteriales	f__Natrialbaceae	g__Halovivax	s__Halovivax ruber	Halovivax ruber XH-70	strain=XH-70
GCA_000328665.1	d__Archaea	p__Halobacteriota	c__Methanosarcinia	o__Methanosarcinales	f__Methanosarcinaceae	g__Methanomethylovorans	s__Methanomethylovorans hollandica	Methanomethylovorans hollandica DSM 15978	strain=DSM 15978
GCA_000328685.1	d__Archaea	p__Halobacteriota	c__Halobacteria	o__Halobacteriales	f__Natrialbaceae	g__Natronococcus	s__Natronococcus occultus	Natronococcus occultus SP4	strain=SP4
GCA_000328945.1	d__Archaea	p__Thermoproteota	c__Nitrososphaeria	o__Nitrososphaerales	f__Nitrosopumilaceae	g__Nitrosopumilus	s__Nitrosopumilus koreensis	Nitrosopumilus sp. SJ	strain=SJ
GCA_000334895.1	d__Archaea	p__Halobacteriota	c__Halobacteria	o__Halobacteriales	f__Halococcaceae	g__Halococcus	s__Halococcus agarilyticus	Halococcus agarilyticus	strain=197A
GCA_000336615.1	d__Archaea	p__Halobacteriota	c__Halobacteria	o__Halobacteriales	f__Haloarculaceae	g__Haloarcula	s__Haloarcula amylolytica	Haloarcula amylolytica JCM 13557	strain=JCM 13557
GCA_000336635.1	d__Archaea	p__Halobacteriota	c__Halobacteria	o__Halobacteriales	f__Haloarculaceae	g__Haloarcula	s__Haloarcula japonica	Haloarcula japonica DSM 6131	strain=DSM 6131
GCA_000336655.1	d__Archaea	p__Halobacteriota	c__Halobacteria	o__Halobacteriales	f__Natrialbaceae	g__Halobiforma	s__Halobiforma lacisalsi	Halobiforma lacisalsi AJ5	strain=AJ5
GCA_000336675.1	d__Archaea	p__Halobacteriota	c__Halobacteria	o__Halobacteriales	f__Halococcaceae	g__Halococcus	s__Halococcus hamelinensis	Halococcus hamelinensis 100A6	strain=100A6
GCA_000336695.1	d__Archaea	p__Halobacteriota	c__Halobacteria	o__Halobacteriales	f__Halococcaceae	g__Halococcus	s__Halococcus morrhuae	Halococcus morrhuae DSM 1307	strain=DSM 1307
GCA_000336715.1	d__Archaea	p__Halobacteriota	c__Halobacteria	o__Halobacteriales	f__Halococcaceae	g__Halococcus	s__Halococcus thailandensis	Halococcus thailandensis JCM 13552	strain=JCM 13552
GCA_000336735.1	d__Archaea	p__Halobacteriota	c__Halobacteria	o__Halobacteriales	f__Haloferacaceae	g__Haloferax	s__Haloferax volcanii	Haloferax alexandrinus JCM 10717	strain=JCM 10717
GCA_000336755.1	d__Archaea	p__Halobacteriota	c__Halobacteria	o__Halobacteriales	f__Haloferacaceae	g__Haloferax	s__Haloferax elongans	Haloferax elongans ATCC BAA-1513	strain=ATCC BAA-1513
GCA_000336775.1	d__Archaea	p__Halobacteriota	c__Halobacteria	o__Halobacteriales	f__Haloferacaceae	g__Haloferax	s__Haloferax gibbonsii	Haloferax gibbonsii ATCC 33959	strain=ATCC 33959
GCA_000336795.1	d__Archaea	p__Halobacteriota	c__Halobacteria	o__Halobacteriales	f__Haloferacaceae	g__Haloferax	s__Haloferax volcanii	Haloferax lucentense DSM 14919	strain=DSM 14919
GCA_000336815.1	d__Archaea	p__Halobacteriota	c__Halobacteria	o__Halobacteriales	f__Haloferacaceae	g__Haloferax	s__Haloferax prahovense	Haloferax prahovense DSM 18310	strain=DSM 18310
GCA_000336835.1	d__Archaea	p__Halobacteriota	c__Halobacteria	o__Halobacteriales	f__Haloferacaceae	g__Haloferax	s__Haloferax volcanii	Haloferax sp. ATCC BAA-645	strain=ATCC BAA-645
GCA_000336855.1	d__Archaea	p__Halobacteriota	c__Halobacteria	o__Halobacteriales	f__Haloferacaceae	g__Haloferax	s__Haloferax volcanii	Haloferax sp. ATCC BAA-646	strain=ATCC BAA-646
GCA_000336875.1	d__Archaea	p__Halobacteriota	c__Halobacteria	o__Halobacteriales	f__Haloferacaceae	g__Halorubrum	s__Halorubrum californiense	Halorubrum californiense DSM 19288	strain=DSM 19288
GCA_000336895.1	d__Archaea	p__Halobacteriota	c__Halobacteria	o__Halobacteriales	f__Haloarculaceae	g__Haloarcula	s__Haloarcula argentinensis	Haloarcula argentinensis DSM 12282	strain=DSM 12282
GCA_000336915.1	d__Archaea	p__Halobacteriota	c__Halobacteria	o__Halobacteriales	f__Halococcaceae	g__Halococcus	s__Halococcus saccharolyticus	Halococcus saccharolyticus DSM 5350	strain=DSM 5350
GCA_000336935.1	d__Archaea	p__Halobacteriota	c__Halobacteria	o__Halobacteriales	f__Halococcaceae	g__Halococcus	s__Halococcus salifodinae	Halococcus salifodinae DSM 8989	strain=DSM 8989
GCA_000336955.1	d__Archaea	p__Halobacteriota	c__Halobacteria	o__Halobacteriales	f__Haloferacaceae	g__Haloferax	s__Haloferax larsenii	Haloferax larsenii JCM 13917	strain=JCM 13917
GCA_000336975.1	d__Archaea	p__Halobacteriota	c__Halobacteria	o__Halobacteriales	f__Haloferacaceae	g__Haloferax	s__Haloferax volcanii	Haloferax sp. ATCC BAA-644	strain=ATCC BAA-644
GCA_000336995.1	d__Archaea	p__Halobacteriota	c__Halobacteria	o__Halobacteriales	f__Haloferacaceae	g__Halorubrum	s__Halorubrum aidingense	Halorubrum aidingense JCM 13560	strain=JCM 13560
GCA_000337015.1	d__Archaea	p__Halobacteriota	c__Halobacteria	o__Halobacteriales	f__Haloferacaceae	g__Halorubrum	s__Halorubrum distributum	Halorubrum arcis JCM 13916	strain=JCM 13916
GCA_000337035.1	d__Archaea	p__Halobacteriota	c__Halobacteria	o__Halobacteriales	f__Haloferacaceae	g__Halorubrum	s__Halorubrum coriense	Halorubrum coriense DSM 10284	strain=DSM 10284
GCA_000337055.1	d__Archaea	p__Halobacteriota	c__Halobacteria	o__Halobacteriales	f__Haloferacaceae	g__Halorubrum	s__Halorubrum distributum	Halorubrum distributum JCM 9100	strain=JCM 9100
GCA_000337075.1	d__Archaea	p__Halobacteriota	c__Halobacteria	o__Halobacteriales	f__Haloferacaceae	g__Halorubrum	s__Halorubrum hochstenium	Halorubrum hochstenium ATCC 700873	strain=ATCC 700873
GCA_000337095.1	d__Archaea	p__Halobacteriota	c__Halobacteria	o__Halobacteriales	f__Haloferacaceae	g__Halogeometricum	s__Halogeometricum pallidum	Halogeometricum pallidum JCM 14848	strain=JCM 14848
GCA_000337115.1	d__Archaea	p__Halobacteriota	c__Halobacteria	o__Halobacteriales	f__Natrialbaceae	g__Natrinema	s__Natrinema thermotolerans	Natrinema thermotolerans DSM 11552	strain=DSM 11552
GCA_000337135.1	d__Archaea	p__Halobacteriota	c__Halobacteria	o__Halobacteriales	f__Natrialbaceae	g__Natrialba	s__Natrialba chahannaoensis	Natrialba chahannaoensis JCM 10990	strain=JCM 10990
GCA_000337155.1	d__Archaea	p__Halobacteriota	c__Halobacteria	o__Halobacteriales	f__Natrialbaceae	g__Natrinema	s__Natrinema altunense	Natrinema altunense JCM 12890	strain=JCM 12890
GCA_000337175.1	d__Archaea	p__Halobacteriota	c__Halobacteria	o__Halobacteriales	f__Natrialbaceae	g__Natrinema	s__Natrinema gari	Natrinema gari JCM 14663	strain=JCM 14663
GCA_000337195.1	d__Archaea	p__Halobacteriota	c__Halobacteria	o__Halobacteriales	f__Natrialbaceae	g__Natrinema	s__Natrinema versiforme	Natrinema versiforme JCM 10478	strain=JCM 10478
GCA_000337215.1	d__Archaea	p__Halobacteriota	c__Halobacteria	o__Halobacteriales	f__Natrialbaceae	g__Natronolimnohabitans	s__Natronolimnohabitans innermongolicus	Natronolimnohabitans innermongolicus JCM 12255	strain=JCM 12255
GCA_000337235.1	d__Archaea	p__Halobacteriota	c__Halobacteria	o__Halobacteriales	f__Natrialbaceae	g__Natronorubrum	s__Natronorubrum tibetense	Natronorubrum tibetense GA33	strain=GA33
GCA_000337255.1	d__Archaea	p__Halobacteriota	c__Halobacteria	o__Halobacteriales	f__Halalkalicoccaceae	g__Halalkalicoccus	s__Halalkalicoccus jeotgali	Halalkalicoccus jeotgali B3	strain=B3
GCA_000337275.1	d__Archaea	p__Halobacteriota	c__Halobacteria	o__Halobacteriales	f__Haloarculaceae	g__Haloarcula	s__Haloarcula marismortui	Haloarcula sinaiiensis ATCC 33800	strain=ATCC 33800
GCA_000337295.1	d__Archaea	p__Halobacteriota	c__Halobacteria	o__Halobacteriales	f__Haloferacaceae	g__Haloferax	s__Haloferax mediterranei	Haloferax mediterranei ATCC 33500	strain=ATCC 33500
GCA_000337315.1	d__Archaea	p__Halobacteriota	c__Halobacteria	o__Halobacteriales	f__Haloferacaceae	g__Haloferax	s__Haloferax volcanii	Haloferax volcanii DS2	strain=DS2
GCA_000337335.1	d__Archaea	p__Halobacteriota	c__Halobacteria	o__Halobacteriales	f__Haloferacaceae	g__Halorubrum	s__Halorubrum distributum	Halorubrum distributum JCM 10118	strain=JCM 10118
GCA_000337355.1	d__Archaea	p__Halobacteriota	c__Halobacteria	o__Halobacteriales	f__Haloferacaceae	g__Halorubrum	s__Halorubrum kocurii	Halorubrum kocurii JCM 14978	strain=JCM 14978
GCA_000337375.1	d__Archaea	p__Halobacteriota	c__Halobacteria	o__Halobacteriales	f__Haloferacaceae	g__Halorubrum	s__Halorubrum lipolyticum	Halorubrum lipolyticum DSM 21995	strain=DSM 21995
GCA_000337395.1	d__Archaea	p__Halobacteriota	c__Halobacteria	o__Halobacteriales	f__Haloferacaceae	g__Halorubrum	s__Halorubrum distributum	Halorubrum litoreum JCM 13561	strain=JCM 13561
GCA_000337415.1	d__Archaea	p__Halobacteriota	c__Halobacteria	o__Halobacteriales	f__Haloferacaceae	g__Halorubrum	s__Halorubrum tebenquichense	Halorubrum tebenquichense DSM 14210	strain=DSM 14210
GCA_000337435.1	d__Archaea	p__Halobacteriota	c__Halobacteria	o__Halobacteriales	f__Haloferacaceae	g__Halorubrum	s__Halorubrum distributum	Halorubrum terrestre JCM 10247	strain=JCM 10247
GCA_000337455.1	d__Archaea	p__Halobacteriota	c__Halobacteria	o__Halobacteriales	f__Haloarculaceae	g__Halosimplex	s__Halosimplex carlsbadense	Halosimplex carlsbadense 2-9-1	strain=2-9-1
GCA_000337475.1	d__Archaea	p__Halobacteriota	c__Halobacteria	o__Halobacteriales	f__Natrialbaceae	g__Natrinema	s__Natrinema limicola	Haloterrigena limicola JCM 13563	strain=JCM 13563
GCA_000337495.1	d__Archaea	p__Halobacteriota	c__Halobacteria	o__Halobacteriales	f__Natrialbaceae	g__Haloterrigena	s__Haloterrigena salina	Haloterrigena salina JCM 13891	strain=JCM 13891
GCA_000337515.1	d__Archaea	p__Halobacteriota	c__Halobacteria	o__Halobacteriales	f__Natrialbaceae	g__Halovivax	s__Halovivax asiaticus	Halovivax asiaticus JCM 14624	strain=JCM 14624
GCA_000337535.1	d__Archaea	p__Halobacteriota	c__Halobacteria	o__Halobacteriales	f__Natrialbaceae	g__Natrialba	s__Natrialba aegyptia	Natrialba aegyptia DSM 13077	strain=DSM 13077
GCA_000337555.1	d__Archaea	p__Halobacteriota	c__Halobacteria	o__Halobacteriales	f__Natrialbaceae	g__Natrialba	s__Natrialba asiatica	Natrialba asiatica DSM 12278	strain=DSM 12278
GCA_000337575.1	d__Archaea	p__Halobacteriota	c__Halobacteria	o__Halobacteriales	f__Natrialbaceae	g__Natrialba	s__Natrialba hulunbeirensis	Natrialba hulunbeirensis JCM 10989	strain=JCM 10989
GCA_000337595.1	d__Archaea	p__Halobacteriota	c__Halobacteria	o__Halobacteriales	f__Natrialbaceae	g__Natrialba	s__Natrialba taiwanensis	Natrialba taiwanensis DSM 12281	strain=DSM 12281
GCA_000337615.1	d__Archaea	p__Halobacteriota	c__Halobacteria	o__Halobacteriales	f__Natrialbaceae	g__Natrinema	s__Natrinema pallidum	Natrinema pallidum DSM 3751	strain=DSM 3751
GCA_000337635.1	d__Archaea	p__Halobacteriota	c__Halobacteria	o__Halobacteriales	f__Natrialbaceae	g__Natrinema	s__Natrinema pellirubrum	Natrinema pellirubrum DSM 15624	strain=DSM 15624
GCA_000337655.1	d__Archaea	p__Halobacteriota	c__Halobacteria	o__Halobacteriales	f__Natrialbaceae	g__Natronobacterium	s__Natronobacterium gregoryi	Natronobacterium gregoryi SP2	strain=SP2
GCA_000337675.1	d__Archaea	p__Halobacteriota	c__Halobacteria	o__Halobacteriales	f__Natrialbaceae	g__Natronococcus	s__Natronococcus amylolyticus	Natronococcus amylolyticus DSM 10524	strain=DSM 10524
GCA_000337695.1	d__Archaea	p__Halobacteriota	c__Halobacteria	o__Halobacteriales	f__Natrialbaceae	g__Natronococcus	s__Natronococcus jeotgali	Natronococcus jeotgali DSM 18795	strain=DSM 18795
GCA_000337715.1	d__Archaea	p__Halobacteriota	c__Halobacteria	o__Halobacteriales	f__Natrialbaceae	g__Natronorubrum	s__Natronorubrum bangense	Natronorubrum bangense JCM 10635	strain=JCM 10635
GCA_000337735.1	d__Archaea	p__Halobacteriota	c__Halobacteria	o__Halobacteriales	f__Natrialbaceae	g__Natronorubrum	s__Natronorubrum sulfidifaciens	Natronorubrum sulfidifaciens JCM 14089	strain=JCM 14089
GCA_000337755.1	d__Archaea	p__Halobacteriota	c__Halobacteria	o__Halobacteriales	f__Haloarculaceae	g__Haloarcula	s__Haloarcula marismortui	Haloarcula californiae ATCC 33799	strain=ATCC 33799
GCA_000337775.1	d__Archaea	p__Halobacteriota	c__Halobacteria	o__Halobacteriales	f__Haloarculaceae	g__Haloarcula	s__Haloarcula vallismortis	Haloarcula vallismortis ATCC 29715	strain=ATCC 29715
GCA_000337795.1	d__Archaea	p__Halobacteriota	c__Halobacteria	o__Halobacteriales	f__Haloferacaceae	g__Haloferax	s__Haloferax denitrificans	Haloferax denitrificans ATCC 35960	strain=ATCC 35960
GCA_000337815.1	d__Archaea	p__Halobacteriota	c__Halobacteria	o__Halobacteriales	f__Haloferacaceae	g__Haloferax	s__Haloferax mucosum	Haloferax mucosum ATCC BAA-1512	strain=ATCC BAA-1512
GCA_000337835.1	d__Archaea	p__Halobacteriota	c__Halobacteria	o__Halobacteriales	f__Haloferacaceae	g__Haloferax	s__Haloferax sulfurifontis	Haloferax sulfurifontis ATCC BAA-897	strain=ATCC BAA-897
GCA_000337855.1	d__Archaea	p__Halobacteriota	c__Halobacteria	o__Halobacteriales	f__Haloferacaceae	g__Halogeometricum	s__Halogeometricum borinquense	Halogeometricum borinquense DSM 11551	strain=DSM 11551
GCA_000337875.1	d__Archaea	p__Halobacteriota	c__Halobacteria	o__Halobacteriales	f__Natrialbaceae	g__Natrialba	s__Natrialba magadii	Natrialba magadii ATCC 43099	strain=MS-3
GCA_000337895.1	d__Archaea	p__Halobacteriota	c__Halobacteria	o__Halobacteriales	f__Natrialbaceae	g__Halobiforma	s__Halobiforma nitratireducens	Halobiforma nitratireducens JCM 10879	strain=JCM 10879
GCA_000337915.1	d__Archaea	p__Halobacteriota	c__Halobacteria	o__Halobacteriales	f__Haloferacaceae	g__Halorubrum	s__Halorubrum saccharovorum	Halorubrum saccharovorum DSM 1137	strain=DSM 1137
GCA_000338775.1	d__Archaea	p__Thermoproteota	c__Thermoprotei_A	o__Sulfolobales	f__Sulfolobaceae	g__Sulfolobus	s__Sulfolobus acidocaldarius	Sulfolobus acidocaldarius Ron12/I	strain=Ron12/I
GCA_000340315.1	d__Archaea	p__Thermoproteota	c__Thermoprotei_A	o__Sulfolobales	f__Sulfolobaceae	g__Sulfolobus	s__Sulfolobus acidocaldarius	Sulfolobus acidocaldarius N8	strain=N8
GCA_000341715.1	d__Archaea	p__Halobacteriota	c__Methanosarcinia	o__Methanosarcinales	f__Methanosarcinaceae	g__Methanosarcina	s__Methanosarcina mazei	Methanosarcina mazei Tuc01	strain=Tuc01
GCA_000350305.1	d__Archaea	p__Thermoplasmatota	c__Thermoplasmata	o__Methanomassiliicoccales	f__Methanomethylophilaceae	g__Methanomethylophilus	s__Methanomethylophilus sp000350305	Thermoplasmatales archaeon BRNA1	strain=BRNA1
GCA_000363885.1	d__Archaea	p__Methanobacteriota	c__Methanococci	o__Methanococcales	f__Methanocaldococcaceae	g__Methanocaldococcus_A	s__Methanocaldococcus_A villosus	Methanocaldococcus villosus KIN24-T80	strain=KIN24-T80
GCA_000364745.1	d__Archaea	p__Thermoproteota	c__Thermoprotei_A	o__Sulfolobales	f__Sulfolobaceae	g__Saccharolobus	s__Saccharolobus islandicus	Sulfolobus islandicus LAL14/1	strain=LAL14/1
GCA_000371805.1	d__Archaea	p__Methanobacteriota	c__Methanococci	o__Methanococcales	f__Methanocaldococcaceae	g__Methanocaldococcus_A	s__Methanocaldococcus_A villosus	Methanocaldococcus villosus KIN24-T80	strain=KIN24-T80
GCA_000375685.1	d__Archaea	p__Thermoproteota	c__Thermoprotei	o__Gearchaeales	f__Gearchaeaceae	g__AAA261-N23	s__AAA261-N23 sp000375685	crenarchaeote SCGC AAA261-N23	strain=SCGC AAA261-N23
GCA_000376445.1	d__Archaea	p__Halobacteriota	c__Halobacteria	o__Halobacteriales	f__Haladaptataceae	g__Haladaptatus	s__Haladaptatus paucihalophilus	Haladaptatus paucihalophilus DX253	strain=DX253
GCA_000376965.1	d__Archaea	p__Methanobacteriota	c__Methanococci	o__Methanococcales	f__Methanococcaceae	g__Methanothermococcus	s__Methanothermococcus thermolithotrophicus	Methanothermococcus thermolithotrophicus DSM 2095	strain=DSM 2095
GCA_000379085.1	d__Archaea	p__Halobacteriota	c__Halobacteria	o__Halobacteriales	f__Haloarculaceae	g__Halomicrobium	s__Halomicrobium katesii	Halomicrobium katesii DSM 19301	strain=DSM 19301
GCA_000380705.1	d__Archaea	p__Thermoproteota	c__Thermoprotei	o__Gearchaeales	f__Gearchaeaceae	g__SCGC-AAA471-B05	s__SCGC-AAA471-B05 sp000380705	Crenarchaeota archaeon SCGC AAA471-B05	strain=SCGC AAA471-B05
GCA_000380905.1	d__Archaea	p__Nanoarchaeota	c__Nanoarchaeia	o__SCGC-AAA011-G17	f__SCGC-AAA011-G17	g__SCGC-AAA011-G17	s__SCGC-AAA011-G17 sp000402515	Nanoarchaeota archaeon SCGC AAA011-L22	strain=SCGC AAA011-L22
GCA_000383975.1	d__Archaea	p__Halobacteriota	c__Halobacteria	o__Halobacteriales	f__Natrialbaceae	g__Natronorubrum	s__Natronorubrum tibetense	Natronorubrum tibetense GA33	strain=GA33
GCA_000385565.1	d__Archaea	p__Halobacteriota	c__Archaeoglobi	o__Archaeoglobales	f__Archaeoglobaceae	g__Archaeoglobus_A	s__Archaeoglobus_A sulfaticallidus	Archaeoglobus sulfaticallidus PM70-1	strain=PM70-1
GCA_000387965.1	d__Archaea	p__Nanoarchaeota	c__Nanoarchaeia	o__Nanoarchaeales	f__Nanopusillaceae	g__Nanopusillus	s__Nanopusillus stetteri	Candidatus Nanobsidianus stetteri	NA
GCA_000389735.1	d__Archaea	p__Thermoproteota	c__Thermoprotei_A	o__Sulfolobales	f__Sulfolobaceae	g__Acd1	s__Acd1 sp000389735	Sulfolobales archaeon Acd1	NA
GCA_000398765.1	d__Archaea	p__Thermoproteota	c__Thermoprotei	o__Gearchaeales	f__Gearchaeaceae	g__SCGC-AAA471-B05	s__SCGC-AAA471-B05 sp000380705	Crenarchaeota archaeon SCGC AAA471-O08	strain=SCGC AAA471-O08
GCA_000399825.1	d__Archaea	p__Thermoproteota	c__Thermoprotei	o__Gearchaeales	f__Gearchaeaceae	g__SCGC-AAA471-B05	s__SCGC-AAA471-B05 sp000380705	Crenarchaeota archaeon SCGC AAA471-L14	strain=SCGC AAA471-L14
GCA_000400975.1	d__Archaea	p__Halobacteriota	c__Halobacteria	o__Halobacteriales	f__Halobacteriaceae	g__Halarchaeum	s__Halarchaeum acidiphilum	Halarchaeum acidiphilum MH1-52-1	strain=MH1-52-1
GCA_000402075.1	d__Archaea	p__Thermoproteota	c__Nitrososphaeria	o__Nitrososphaerales	f__Nitrosopumilaceae	g__Nitrosopelagicus	s__Nitrosopelagicus sp000402075	Thaumarchaeota archaeon SCGC AAA007-O23	strain=SCGC AAA007-O23
GCA_000402095.1	d__Archaea	p__Thermoproteota	c__Thermoprotei	o__Gearchaeales	f__Gearchaeaceae	g__SCGC-AAA471-B05	s__SCGC-AAA471-B05 sp000380705	Crenarchaeota archaeon SCGC AAA471-L13	strain=SCGC AAA471-L13
GCA_000402355.1	d__Archaea	p__Iainarchaeota	c__Iainarchaeia	o__Iainarchaeales	f__Iainarchaeaceae	g__Iainarchaeum	s__Iainarchaeum andersonii	Candidatus Iainarchaeum andersonii SCGC AAA011-E11	strain=SCGC AAA011-E11
GCA_000402515.1	d__Archaea	p__Nanoarchaeota	c__Nanoarchaeia	o__SCGC-AAA011-G17	f__SCGC-AAA011-G17	g__SCGC-AAA011-G17	s__SCGC-AAA011-G17 sp000402515	Nanoarchaeota archaeon SCGC AAA011-G17	strain=SCGC AAA011-G17
GCA_000402775.1	d__Archaea	p__Altiarchaeota	c__Altiarchaeia	o__IMC4	f__SCGC-AAA252-I15	g__SCGC-AAA252-I15	s__SCGC-AAA252-I15 sp000402775	Euryarchaeota archaeon SCGC AAA252-I15	strain=SCGC AAA252-I15
GCA_000402965.1	d__Archaea	p__Thermoproteota	c__Nitrososphaeria_A	o__Caldarchaeales	f__HR02	g__AWOC01	s__AWOC01 sp000494185	Aigarchaeota archaeon SCGC AAA471-E14	strain=SCGC AAA471-E14
GCA_000403645.1	d__Archaea	p__Halobacteriota	c__Halobacteria	o__Halobacteriales	f__Salinarchaeaceae	g__Salinarchaeum	s__Salinarchaeum sp000403645	Salinarchaeum sp. Harcht-Bsk1	strain=Harcht-Bsk1
GCA_000404165.1	d__Archaea	p__Methanobacteriota	c__Methanobacteria	o__Methanobacteriales	f__Methanobacteriaceae	g__Methanobrevibacter_B	s__Methanobrevibacter_B boviskoreani	Methanobrevibacter sp. AbM4	strain=AbM4
GCA_000404225.1	d__Archaea	p__Thermoplasmatota	c__Thermoplasmata	o__Methanomassiliicoccales	f__Methanomassiliicoccaceae	g__Methanomassiliicoccus_A	s__Methanomassiliicoccus_A intestinalis	Candidatus Methanomassiliicoccus intestinalis Issoire-Mx1	strain=Issoire-Mx1
GCA_000405225.1	d__Archaea	p__Nanoarchaeota	c__Nanoarchaeia	o__Pacearchaeales	f__GW2011-AR1	g__ASMP01	s__ASMP01 sp000405225	Nanoarchaeota archaeon SCGC AAA011-D5	strain=SCGC AAA011-D5
GCA_000405245.1	d__Archaea	p__Aenigmatarchaeota	c__Aenigmatarchaeia	o__Aenigmatarchaeales	f__Aenigmatarchaeaceae	g__Aenigmatarchaeum	s__Aenigmatarchaeum subterraneum	Candidatus Aenigmarchaeum subterraneum SCGC AAA011-O16	strain=SCGC AAA011-O16
GCA_000405685.1	d__Archaea	p__Thermoproteota	c__Nitrososphaeria_A	o__Caldarchaeales	f__Wolframiiraptoraceae	g__Geocrenenecus	s__Geocrenenecus sp000405685	Candidatus Geocrenenecus sp. JGI 0000106-J15	strain=JGI 0000106-J15
GCA_000405885.1	d__Archaea	p__Thermoproteota	c__Thermoprotei	o__Gearchaeales	f__Gearchaeaceae	g__SCGC-AAA471-B05	s__SCGC-AAA471-B05 sp000380705	Crenarchaeota archaeon SCGC AAA471-B23	strain=SCGC AAA471-B23
GCA_000405905.1	d__Archaea	p__Thermoproteota	c__Nitrososphaeria_A	o__Caldarchaeales	f__HR02	g__JGI-OTU-1	s__JGI-OTU-1 sp000494145	Aigarchaeota archaeon SCGC AAA471-F17	strain=SCGC AAA471-F17
GCA_000415965.1	d__Archaea	p__Halobacteriota	c__Halobacteria	o__Halobacteriales	f__Haloferacaceae	g__Haloquadratum	s__Haloquadratum walsbyi_A	Haloquadratum walsbyi J07HQW1	NA
GCA_000415985.1	d__Archaea	p__Halobacteriota	c__Halobacteria	o__Halobacteriales	f__Haloferacaceae	g__Haloquadratum	s__Haloquadratum walsbyi_B	Haloquadratum walsbyi J07HQW2	NA
GCA_000416005.1	d__Archaea	p__Halobacteriota	c__Halobacteria	o__Halobacteriales	f__Haloferacaceae	g__Haloquadratum	s__Haloquadratum sp000416005	Haloquadratum sp. J07HQX50	NA
GCA_000416025.1	d__Archaea	p__Halobacteriota	c__Halobacteria	o__Halobacteriales	f__Haloferacaceae	g__Halonotius	s__Halonotius sp000496215	Halonotius sp. J07HN6	NA
GCA_000416085.1	d__Archaea	p__Halobacteriota	c__Halobacteria	o__Halobacteriales	f__Haloarculaceae	g__Halovenus	s__Halovenus sp000416085	halophilic archaeon J07HX64	NA
GCA_000421805.1	d__Archaea	p__Halobacteriota	c__Halobacteria	o__Halobacteriales	f__Haloferacaceae	g__Halorubrum	s__Halorubrum ezzemoulense	Halorubrum ezzemoulense DSM 17463	strain=DSM 17463
GCA_000427685.1	d__Archaea	p__Halobacteriota	c__Halobacteria	o__Halobacteriales	f__Haloferacaceae	g__Haloplanus	s__Haloplanus natans	Haloplanus natans DSM 17983	strain=DSM 17983
GCA_000430485.1	d__Archaea	p__Methanobacteriota_B	c__Thermococci	o__Thermococcales	f__Thermococcaceae	g__Thermococcus_A	s__Thermococcus_A bergensis	Thermococcus sp. PK	strain=PK
GCA_000430905.1	d__Archaea	p__Halobacteriota	c__Methanomicrobia	o__Methanomicrobiales	f__Methanocorpusculaceae	g__Methanocorpusculum	s__Methanocorpusculum parvum	Methanocorpusculum bavaricum DSM 4179	strain=DSM 4179
GCA_000437055.1	d__Archaea	p__Methanobacteriota	c__Methanobacteria	o__Methanobacteriales	f__Methanobacteriaceae	g__Methanobrevibacter_A	s__Methanobrevibacter_A smithii	Methanobrevibacter smithii CAG:186	NA
GCA_000437835.1	d__Archaea	p__Thermoplasmatota	c__Thermoplasmata	o__Methanomassiliicoccales	f__Methanomethylophilaceae	g__Methanomethylophilus	s__Methanomethylophilus alvus	Methanoculleus sp. CAG:1088	NA
GCA_000446015.1	d__Archaea	p__Thermoproteota	c__Thermoprotei	o__Thermofilales	f__Thermofilaceae	g__Thermofilum_B	s__Thermofilum_B adornatum	Thermofilum adornatum	strain=1910b
GCA_000447225.1	d__Archaea	p__Thermoplasmatota	c__Thermoplasmata	o__Thermoplasmatales	f__Thermoplasmataceae	g__UBA509	s__UBA509 sp002498845	Thermoplasmatales archaeon A-plasma	NA
GCA_000447865.2	d__Archaea	p__Halobacteriota	c__Halobacteria	o__Halobacteriales	f__Haloferacaceae	g__Halopenitus	s__Halopenitus persicus	haloarchaeon 3A1-DGR	strain=3A1-DGR
GCA_000455345.1	d__Archaea	p__Halobacteriota	c__Halobacteria	o__Halobacteriales	f__Natrialbaceae	g__Halopiger_A	s__Halopiger_A goleimassiliensis	Halopiger goleimassiliensis	strain=IIH3
GCA_000455365.1	d__Archaea	p__Halobacteriota	c__Halobacteria	o__Halobacteriales	f__Natrialbaceae	g__Halopiger_B	s__Halopiger_B djelfimassiliensis	Halopiger djelfimassiliensis	strain=IIH2
GCA_000470655.1	d__Archaea	p__Halobacteriota	c__Halobacteria	o__Halobacteriales	f__Haloarculaceae	g__Halorhabdus	s__Halorhabdus tiamatea	Halorhabdus tiamatea SARL4B	strain=type strain: SARL4B
GCA_000474235.1	d__Archaea	p__Halobacteriota	c__Halobacteria	o__Halobacteriales	f__Halobacteriaceae	g__Halarchaeum	s__Halarchaeum acidiphilum	Halarchaeum acidiphilum MH1-52-1	strain=JCM 16109
GCA_000484935.1	d__Archaea	p__Thermoproteota	c__Nitrososphaeria	o__Nitrososphaerales	f__Nitrosopumilaceae	g__Nitrosopelagicus	s__Nitrosopelagicus sp000484935	Euryarchaeota archaeum SCGC AAA287-E17	strain=SCGC AAA287-E17
GCA_000485535.1	d__Archaea	p__Halobacteriota	c__Halobacteria	o__Halobacteriales	f__Halalkalicoccaceae	g__Halalkalicoccus	s__Halalkalicoccus jeotgali	Halalkalicoccus jeotgali B3	strain=B3
GCA_000493245.1	d__Archaea	p__Halobacteriota	c__Halobacteria	o__Halobacteriales	f__Natrialbaceae	g__Natrinema	s__Natrinema gari	Natrinema sp. J7-1	strain=J7-1
GCA_000494105.1	d__Archaea	p__Nanoarchaeota	c__Nanoarchaeia	o__SCGC-AAA011-G17	f__SCGC-AAA011-G17	g__SCGC-AAA011-G17	s__SCGC-AAA011-G17 sp000402515	Nanoarchaeota archaeon JGI OTU-1	strain=JGI OTU-1
GCA_000494145.1	d__Archaea	p__Thermoproteota	c__Nitrososphaeria_A	o__Caldarchaeales	f__HR02	g__JGI-OTU-1	s__JGI-OTU-1 sp000494145	Thaumarchaeota archaeon JGI OTU-1	strain=JGI OTU-1
GCA_000494185.1	d__Archaea	p__Thermoproteota	c__Nitrososphaeria_A	o__Caldarchaeales	f__HR02	g__AWOC01	s__AWOC01 sp000494185	Thaumarchaeota archaeon JGI OTU-3	strain=JGI OTU-3
GCA_000494205.1	d__Archaea	p__Thermoproteota	c__Thermoprotei	o__Gearchaeales	f__Gearchaeaceae	g__SCGC-AAA471-B05	s__SCGC-AAA471-B05 sp000380705	crenarchaeote JGI-OTU-1	strain=JGI-OTU-1
GCA_000495475.1	d__Archaea	p__Halobacteriota	c__Halobacteria	o__Halobacteriales	f__Haloferacaceae	g__Halobaculum	s__Halobaculum tyrrellense	Candidatus Halobonum tyrrellensis G22	strain=G22
GCA_000495675.1	d__Archaea	p__Thermoproteota	c__Thermoprotei_A	o__Sulfolobales	f__Acidilobaceae	g__Acidilobus	s__Acidilobus sp000495735	uncultured Acidilobus sp. MG	NA
GCA_000495695.1	d__Archaea	p__Thermoproteota	c__Thermoprotei_A	o__Sulfolobales	f__Acidilobaceae	g__Acidilobus	s__Acidilobus sp000495735	uncultured Acidilobus sp. CIS	NA
GCA_000495715.1	d__Archaea	p__Thermoproteota	c__Thermoprotei_A	o__Sulfolobales	f__Acidilobaceae	g__Acidilobus	s__Acidilobus sp000495735	uncultured Acidilobus sp. OSP8	NA
GCA_000495735.1	d__Archaea	p__Thermoproteota	c__Thermoprotei_A	o__Sulfolobales	f__Acidilobaceae	g__Acidilobus	s__Acidilobus sp000495735	uncultured Acidilobus sp. JCHS	NA
GCA_000496135.1	d__Archaea	p__Thermoplasmatota	c__Thermoplasmata	o__Thermoplasmatales	f__Thermoplasmataceae	g__GCA-000496135	s__GCA-000496135 sp000496135	Thermoplasmatales archaeon E-plasma	NA
GCA_000496175.1	d__Archaea	p__Halobacteriota	c__Halobacteria	o__Halobacteriales	f__Haloferacaceae	g__Halorubrum	s__Halorubrum sp000496175	uncultured archaeon A07HR67	NA
GCA_000496195.1	d__Archaea	p__Halobacteriota	c__Halobacteria	o__Halobacteriales	f__Haloferacaceae	g__A07HB70	s__A07HB70 sp000496195	uncultured archaeon A07HB70	NA
GCA_000496215.1	d__Archaea	p__Halobacteriota	c__Halobacteria	o__Halobacteriales	f__Haloferacaceae	g__Halonotius	s__Halonotius sp000496215	uncultured archaeon A07HN63	NA
GCA_000496235.1	d__Archaea	p__Halobacteriota	c__Halobacteria	o__Halobacteriales	f__Haloferacaceae	g__J07HR59	s__J07HR59 sp000496235	uncultured archaeon A07HR60	NA
GCA_000499765.1	d__Archaea	p__Methanobacteriota	c__Methanobacteria	o__Methanobacteriales	f__Methanobacteriaceae	g__Methanobacterium	s__Methanobacterium sp000499765	Methanobacterium sp. MB1	NA
GCA_000504205.1	d__Archaea	p__Halobacteriota	c__Methanosarcinia	o__Methanosarcinales	f__Methanosarcinaceae	g__Methanolobus	s__Methanolobus tindarius	Methanolobus tindarius DSM 2278	strain=DSM 2278
GCA_000504565.2	d__Archaea	p__Halobacteriota	c__Halobacteria	o__Halobacteriales	f__Haloarculaceae	g__Haloarcula	s__Haloarcula hispanica	Haloarcula hispanica N601	strain=N601
GCA_000508305.1	d__Archaea	p__Thermoproteota	c__Thermoprotei_A	o__Sulfolobales	f__Sulfolobaceae	g__Sulfolobus	s__Sulfolobus acidocaldarius_A	Sulfolobus acidocaldarius SUSAZ	strain=SUSAZ
GCA_000513315.1	d__Archaea	p__Methanobacteriota	c__Methanobacteria	o__Methanobacteriales	f__Methanobacteriaceae	g__Methanobrevibacter_C	s__Methanobrevibacter_C arboriphilus_A	Methanobrevibacter arboriphilus ANOR1	strain=ANOR1
GCA_000513855.1	d__Archaea	p__Thermoproteota	c__Thermoprotei_A	o__Sulfolobales	f__Desulfurococcaceae	g__Desulfurococcus	s__Desulfurococcus amylolyticus	Desulfurococcus amylolyticus Z-533	strain=Z-533
GCA_000517445.1	d__Archaea	p__Methanobacteriota_B	c__Thermococci	o__Thermococcales	f__Thermococcaceae	g__Thermococcus_B	s__Thermococcus_B paralvinellae	Thermococcus paralvinellae	strain=ES1
GCA_000517625.1	d__Archaea	p__Halobacteriota	c__Halobacteria	o__Halobacteriales	f__Natrialbaceae	g__Halostagnicola	s__Halostagnicola larsenii	Halostagnicola larsenii XH-48	strain=XH-48
GCA_000529525.1	d__Archaea	p__Methanobacteriota	c__Methanobacteria	o__Methanobacteriales	f__Methanobacteriaceae	g__Methanobrevibacter_A	s__Methanobrevibacter_A oralis	Methanobrevibacter oralis JMR01	strain=JMR01
GCA_000565255.1	d__Archaea	p__Thermoproteota	c__Thermoprotei_A	o__Sulfolobales	f__Sulfolobaceae	g__Aramenus	s__Aramenus sulfurataquae	Candidatus Aramenus sulfurataquae	NA
GCA_000585495.1	d__Archaea	p__Methanobacteriota_B	c__Thermococci	o__Thermococcales	f__Thermococcaceae	g__Thermococcus	s__Thermococcus nautili	Thermococcus nautili	strain=30-1
GCA_000591035.1	d__Archaea	p__Thermoproteota	c__Thermoprotei_A	o__Sulfolobales	f__Acidilobaceae	g__Aeropyrum	s__Aeropyrum camini	Aeropyrum camini SY1 = JCM 12091	strain=SY1
GCA_000591055.1	d__Archaea	p__Halobacteriota	c__Halobacteria	o__Halobacteriales	f__Haloarculaceae	g__Natronomonas	s__Natronomonas moolapensis	Natronomonas moolapensis 8.8.11	strain=8.8.11
GCA_000621965.1	d__Archaea	p__Methanobacteriota	c__Methanobacteria	o__Methanobacteriales	f__Methanobacteriaceae	g__Methanobrevibacter_B	s__Methanobrevibacter_B wolinii	Methanobrevibacter wolinii SH	strain=SH
GCA_000632495.1	d__Archaea	p__Thermoproteota	c__Thermoprotei_A	o__Sulfolobales	f__Sulfolobaceae	g__Acidianus	s__Acidianus copahuensis	Candidatus Acidianus copahuensis	strain=ALE1
GCA_000685155.1	d__Archaea	p__Halobacteriota	c__Methanosarcinia	o__Methanosarcinales	f__Methanoperedenaceae	g__Methanoperedens	s__Methanoperedens nitroreducens	Candidatus Methanoperedens nitroreducens	strain=ANME-2d
GCA_000685395.1	d__Archaea	p__Thermoproteota	c__Nitrososphaeria	o__Nitrososphaerales	f__Nitrosopumilaceae	g__Nitrosotenuis	s__Nitrosotenuis chungbukensis	Candidatus Nitrosotenuis chungbukensis	strain=MY2
GCA_000685635.1	d__Archaea	p__Halobacteriota	c__Halobacteria	o__Halobacteriales	f__Haloferacaceae	g__Haloferax	s__Haloferax mediterranei	Haloferax mediterranei ATCC 33500	strain=ATCC 33500
GCA_000690595.2	d__Archaea	p__Halobacteriota	c__Halobacteria	o__Halobacteriales	f__Natrialbaceae	g__Natrinema	s__Natrinema mahii	Natrinema mahii	strain=H13
GCA_000691505.2	d__Archaea	p__Halobacteriota	c__Halobacteria	o__Halobacteriales	f__Natrialbaceae	g__Halostagnicola	s__Halostagnicola sp000691505	Halostagnicola sp. A56	strain=A56
GCA_000691865.1	d__Archaea	p__Halobacteriota	c__Methanomicrobia	o__Methanomicrobiales	f__Methanoculleaceae	g__Methanoculleus	s__Methanoculleus sp000691865	Methanoculleus sp. MH98A	strain=MH98A
GCA_000698785.1	d__Archaea	p__Thermoproteota	c__Nitrososphaeria	o__Nitrososphaerales	f__Nitrososphaeraceae	g__Nitrososphaera	s__Nitrososphaera viennensis	Nitrososphaera viennensis EN76	strain=EN76
GCA_000700025.2	d__Archaea	p__Halobacteriota	c__Halobacteria	o__Halobacteriales	f__Haloferacaceae	g__Halorubrum	s__Halorubrum halophilum	Halorubrum saccharovorum	strain=H3
GCA_000710605.1	d__Archaea	p__Halobacteriota	c__Halobacteria	o__Halobacteriales	f__Natrialbaceae	g__Natrinema	s__Natrinema thermotolerans	Natrinema thermotolerans A29	strain=A29
GCA_000710615.1	d__Archaea	p__Halobacteriota	c__Halobacteria	o__Halobacteriales	f__Haladaptataceae	g__Haladaptatus	s__Haladaptatus cibarius	Haladaptatus cibarius D43	strain=D43
GCA_000711215.1	d__Archaea	p__Halobacteriota	c__Methanomicrobia	o__Methanomicrobiales	f__Methanomicrobiaceae	g__Methanomicrobium	s__Methanomicrobium mobile	Methanomicrobium mobile BP	strain=BP
GCA_000711905.1	d__Archaea	p__Halobacteriota	c__Methanosarcinia_A	o__Methanosarcinales_A	f__Methermicoccaceae	g__Methermicoccus	s__Methermicoccus shengliensis	Methermicoccus shengliensis DSM 18856	strain=DSM 18856
GCA_000722915.1	d__Archaea	p__Thermoproteota	c__Nitrososphaeria	o__Nitrososphaerales	f__Nitrosopumilaceae	g__Nitrosopumilus	s__Nitrosopumilus sp000746765	Marine Group I thaumarchaeote SCGC AAA799-N04	NA
GCA_000723185.1	d__Archaea	p__Thermoproteota	c__Nitrososphaeria	o__Nitrososphaerales	f__Nitrosopumilaceae	g__Nitrosotenuis	s__Nitrosotenuis uzonensis	Candidatus Nitrosotenuis uzonensis	strain=N4
GCA_000723845.1	d__Archaea	p__Halobacteriota	c__Halobacteria	o__Halobacteriales	f__Haloferacaceae	g__Haloferax	s__Haloferax prahovense	Haloferax prahovense	strain=Arc-Hr
GCA_000724145.1	d__Archaea	p__Thermoproteota	c__Nitrososphaeria	o__Nitrososphaerales	f__Nitrosopumilaceae	g__Nitrosopumilus	s__Nitrosopumilus sp000746765	Marine Group I thaumarchaeote SCGC AAA799-E16	NA
GCA_000725425.1	d__Archaea	p__Methanobacteriota_B	c__Thermococci	o__Thermococcales	f__Thermococcaceae	g__Palaeococcus	s__Palaeococcus pacificus	Palaeococcus pacificus DY20341	strain=DY20341
GCA_000730285.1	d__Archaea	p__Thermoproteota	c__Nitrososphaeria	o__Nitrososphaerales	f__Nitrososphaeraceae	g__Nitrososphaera	s__Nitrososphaera evergladensis	Candidatus Nitrososphaera evergladensis SR1	NA
GCA_000731985.1	d__Archaea	p__Halobacteriota	c__Halobacteria	o__Halobacteriales	f__Natrialbaceae	g__Natrinema	s__Natrinema altunense	Natrinema altunense	strain=AJ2
GCA_000734035.1	d__Archaea	p__Halobacteriota	c__Archaeoglobi	o__Archaeoglobales	f__Archaeoglobaceae	g__Archaeoglobus	s__Archaeoglobus fulgidus	Archaeoglobus fulgidus DSM 8774	strain=DSM 8774
GCA_000739065.1	d__Archaea	p__Methanobacteriota	c__Methanococci	o__Methanococcales	f__Methanocaldococcaceae	g__Methanocaldococcus	s__Methanocaldococcus bathoardescens	Methanocaldococcus bathoardescens	strain=JH146
GCA_000739555.1	d__Archaea	p__Halobacteriota	c__Halobacteria	o__Halobacteriales	f__Haloferacaceae	g__Halolamina	s__Halolamina rubra	Halolamina rubra	strain=CBA1107
GCA_000739575.1	d__Archaea	p__Halobacteriota	c__Halobacteria	o__Halobacteriales	f__Haloferacaceae	g__Halobellus	s__Halobellus rufus	Halobellus rufus	strain=CBA1103
GCA_000739595.1	d__Archaea	p__Halobacteriota	c__Halobacteria	o__Halobacteriales	f__Haloferacaceae	g__Halorubrum	s__Halorubrum halophilum	Halorubrum halophilum	strain=B8
GCA_000744315.1	d__Archaea	p__Halobacteriota	c__Methanosarcinia	o__Methanosarcinales	f__Methanosarcinaceae	g__Methanosarcina	s__Methanosarcina mazei	Methanosarcina soligelidi	strain=SMA-21
GCA_000744455.1	d__Archaea	p__Methanobacteriota	c__Methanobacteria	o__Methanobacteriales	f__Methanobacteriaceae	g__Methanobacterium_B	s__Methanobacterium_B sp000744455	Methanobacterium sp. SMA-27	strain=SMA-27
GCA_000745485.1	d__Archaea	p__Methanobacteriota	c__Methanobacteria	o__Methanobacteriales	f__Methanobacteriaceae	g__Methanobacterium_D	s__Methanobacterium_D veterum	Methanobacterium veterum	strain=MK4
GCA_000746075.1	d__Archaea	p__Methanobacteriota	c__Methanobacteria	o__Methanobacteriales	f__Methanobacteriaceae	g__Methanobacterium_D	s__Methanobacterium_D veterum	Methanobacterium arcticum	strain=M2
GCA_000746205.1	d__Archaea	p__Halobacteriota	c__Halobacteria	o__Halobacteriales	f__Haloferacaceae	g__Halorubrum	s__Halorubrum sp000746205	Halorubrum sp. BV1	strain=BV1
GCA_000746685.1	d__Archaea	p__Thermoproteota	c__Nitrososphaeria	o__Nitrososphaerales	f__Nitrosopumilaceae	g__Nitrosopumilus	s__Nitrosopumilus sp000746765	Marine Group I thaumarchaeote SCGC AAA799-P11	NA
GCA_000746705.1	d__Archaea	p__Thermoproteota	c__Nitrososphaeria	o__Nitrososphaerales	f__Nitrosopumilaceae	g__Nitrosopelagicus	s__Nitrosopelagicus sp000746705	Marine Group I thaumarchaeote SCGC AAA799-O18	NA
GCA_000746745.1	d__Archaea	p__Thermoproteota	c__Nitrososphaeria	o__Nitrososphaerales	f__Nitrosopumilaceae	g__Nitrosopumilus	s__Nitrosopumilus sp000746765	Marine Group I thaumarchaeote SCGC RSA3	NA
GCA_000746765.1	d__Archaea	p__Thermoproteota	c__Nitrososphaeria	o__Nitrososphaerales	f__Nitrosopumilaceae	g__Nitrosopumilus	s__Nitrosopumilus sp000746765	Marine Group I thaumarchaeote SCGC AAA799-D11	NA
GCA_000746785.1	d__Archaea	p__Thermoproteota	c__Nitrososphaeria	o__Nitrososphaerales	f__Nitrosopumilaceae	g__Nitrosopumilus	s__Nitrosopumilus sp000746765	Marine Group I thaumarchaeote SCGC AAA799-B03	NA
GCA_000747605.1	d__Archaea	p__Thermoproteota	c__Thermoprotei_A	o__Sulfolobales	f__Sulfolobaceae	g__Metallosphaera	s__Metallosphaera sedula	Metallosphaera sedula	strain=CuR1
GCA_000755225.1	d__Archaea	p__Halobacteriota	c__Halobacteria	o__Halobacteriales	f__Haloarculaceae	g__Halapricum	s__Halapricum salinum	Halapricum salinum	strain=CBA1105
GCA_000755245.1	d__Archaea	p__Halobacteriota	c__Halobacteria	o__Halobacteriales	f__Halococcaceae	g__Halococcus	s__Halococcus sediminicola	Halococcus sediminicola	strain=CBA1101
GCA_000762265.1	d__Archaea	p__Methanobacteriota	c__Methanobacteria	o__Methanobacteriales	f__Methanobacteriaceae	g__Methanobacterium	s__Methanobacterium formicicum	Methanobacterium formicicum	strain=BRM9
GCA_000765475.1	d__Archaea	p__Halobacteriota	c__Methanosarcinia	o__Methanosarcinales	f__Methanosarcinaceae	g__Methanococcoides	s__Methanococcoides methylutens	Methanococcoides methylutens	strain=DSM 2657
GCA_000769655.1	d__Archaea	p__Methanobacteriota_B	c__Thermococci	o__Thermococcales	f__Thermococcaceae	g__Thermococcus	s__Thermococcus eurythermalis	Thermococcus eurythermalis	strain=A501
GCA_000784335.1	d__Archaea	p__Halobacteriota	c__Halobacteria	o__Halobacteriales	f__Natrialbaceae	g__Natrinema	s__Natrinema salifodinae	Natrinema salifodinae	strain=KCY07-B2
GCA_000784355.1	d__Archaea	p__Halobacteriota	c__Methanomicrobia	o__Methanomicrobiales	f__Methanomicrobiaceae	g__Methanolacinia	s__Methanolacinia paynteri	Methanolacinia paynteri	strain=DSM 2545
GCA_000789255.1	d__Archaea	p__Halobacteriota	c__Archaeoglobi	o__Archaeoglobales	f__Archaeoglobaceae	g__Geoglobus	s__Geoglobus acetivorans	Geoglobus acetivorans	strain=SBH6
GCA_000800805.1	d__Archaea	p__Thermoplasmatota	c__Thermoplasmata	o__Methanomassiliicoccales	f__Methanomethylophilaceae	g__Methanoplasma	s__Methanoplasma termitum	Candidatus Methanoplasma termitum	strain=MpT1
GCA_000802205.2	d__Archaea	p__Thermoproteota	c__Nitrososphaeria	o__Nitrososphaerales	f__Nitrososphaeraceae	g__Nitrosocosmicus	s__Nitrosocosmicus oleophilus	Candidatus Nitrosocosmicus oleophilus	strain=MY3
GCA_000805935.1	d__Archaea	p__Nanoarchaeota	c__Nanoarchaeia	o__Woesearchaeales	f__GW2011-AR9	g__GW2011-AR9	s__GW2011-AR9 sp10194u	archaeon GW2011_AR9	NA
GCA_000805965.1	d__Archaea	p__Nanoarchaeota	c__Nanoarchaeia	o__Pacearchaeales	f__GW2011-AR1	g__GW2011-AR13	s__GW2011-AR13 sp9966u	archaeon GW2011_AR13	NA
GCA_000805995.1	d__Archaea	p__Nanoarchaeota	c__Nanoarchaeia	o__SCGC-AAA011-G17	f__GW2011-AR17	g__GW2011-AR17	s__GW2011-AR17 sp10136u	archaeon GW2011_AR17	NA
GCA_000806015.1	d__Archaea	p__Nanoarchaeota	c__Nanoarchaeia	o__Pacearchaeales	f__GW2011-AR1	g__JWKY01	s__JWKY01 sp000806015	archaeon GW2011_AR19	NA
GCA_000806055.1	d__Archaea	p__Nanoarchaeota	c__Nanoarchaeia	o__Pacearchaeales	f__GW2011-AR1	g__GW2011-AR1	s__GW2011-AR1 sp002762735	archaeon GW2011_AR1	NA
GCA_000806095.1	d__Archaea	p__Nanoarchaeota	c__Nanoarchaeia	o__Woesearchaeales	f__UBA9989	g__UBA9989	s__UBA9989 sp9989u	archaeon GW2011_AR4	NA
GCA_000806115.1	d__Archaea	p__Aenigmatarchaeota	c__Aenigmatarchaeia	o__GW2011-AR5	f__GW2011-AR5	g__GW2011-AR5	s__GW2011-AR5 sp000806115	archaeon GW2011_AR5	NA
GCA_000806135.1	d__Archaea	p__Nanoarchaeota	c__Nanoarchaeia	o__Woesearchaeales	f__GW2011-AR4	g__GW2011-AR11	s__GW2011-AR11 sp12027u	archaeon GW2011_AR11	NA
GCA_000806155.1	d__Archaea	p__Nanoarchaeota	c__Nanoarchaeia	o__SCGC-AAA011-G17	f__GW2011-AR18	g__GW2011-AR18	s__GW2011-AR18 sp000806155	archaeon GW2011_AR18	NA
GCA_000812185.1	d__Archaea	p__Thermoproteota	c__Nitrososphaeria	o__Nitrososphaerales	f__Nitrosopumilaceae	g__Nitrosopelagicus	s__Nitrosopelagicus brevis	Candidatus Nitrosopelagicus brevis	strain=CN25
GCA_000813245.1	d__Archaea	p__Thermoproteota	c__Thermoprotei	o__Thermofilales	f__Thermofilaceae	g__Thermofilum_B	s__Thermofilum_B adornatum	Thermofilum adornatum 1505	strain=1505
GCA_000815265.1	d__Archaea	p__Halobacteriota	c__Halobacteria	o__Halobacteriales	f__Natrialbaceae	g__Natrinema	s__Natrinema altunense	Natrinema altunense	strain=1A4-DGR
GCA_000815385.1	d__Archaea	p__Halobacteriota	c__Halobacteria	o__Halobacteriales	f__Haloarculaceae	g__Haloarcula	s__Haloarcula hispanica	Haloarcula salaria	strain=H5-DGR
GCA_000816105.1	d__Archaea	p__Methanobacteriota_B	c__Thermococci	o__Thermococcales	f__Thermococcaceae	g__Thermococcus	s__Thermococcus guaymasensis	Thermococcus guaymasensis DSM 11113	strain=DSM 11113
GCA_000824705.1	d__Archaea	p__Methanobacteriota	c__Methanobacteria	o__Methanobacteriales	f__Methanobacteriaceae	g__Methanobrevibacter_A	s__Methanobrevibacter_A smithii	Methanobrevibacter smithii	strain=ACE6
GCA_000827835.1	d__Archaea	p__Halobacteriota	c__Halobacteria	o__Halobacteriales	f__Haloarculaceae	g__Haloarcula	s__Haloarcula hispanica	Haloarcula sp. CBA1115	strain=CBA1115
GCA_000828535.1	d__Archaea	p__Methanobacteriota	c__Methanococci	o__Methanococcales	f__Methanococcaceae	g__Methanococcus	s__Methanococcus maripaludis	Methanococcus maripaludis KA1	strain=KA1
GCA_000828555.1	d__Archaea	p__Methanobacteriota	c__Methanococci	o__Methanococcales	f__Methanococcaceae	g__Methanococcus	s__Methanococcus maripaludis	Methanococcus maripaludis OS7	strain=OS7
GCA_000828575.1	d__Archaea	p__Methanobacteriota	c__Methanobacteria	o__Methanobacteriales	f__Methanothermobacteraceae	g__Methanothermobacter	s__Methanothermobacter sp000828575	Methanothermobacter sp. CaT2	strain=CaT2
GCA_000830275.1	d__Archaea	p__Iainarchaeota	c__Iainarchaeia	o__Iainarchaeales	f__GW2011-AR10	g__GW2011-AR10	s__GW2011-AR10 sp000830275	archaeon GW2011_AR10	NA
GCA_000830295.1	d__Archaea	p__Nanoarchaeota	c__Nanoarchaeia	o__Woesearchaeales	f__GW2011-AR15	g__GW2011-AR15	s__GW2011-AR15 sp000830295	archaeon GW2011_AR15	NA
GCA_000830315.1	d__Archaea	p__Nanoarchaeota	c__Nanoarchaeia	o__SCGC-AAA011-G17	f__GW2011-AR20	g__GW2011-AR20	s__GW2011-AR20 sp000830315	archaeon GW2011_AR20	NA
GCA_000875775.1	d__Archaea	p__Thermoproteota	c__Nitrososphaeria	o__Nitrososphaerales	f__Nitrosopumilaceae	g__Nitrosopumilus	s__Nitrosopumilus piranensis	Nitrosopumilus piranensis	strain=D3C
GCA_000949015.1	d__Archaea	p__Thermoplasmatota	c__Thermoplasmata	o__Thermoplasmatales	f__Thermoplasmataceae	g__Acidiplasma	s__Acidiplasma aeolicum	Acidiplasma sp. MBA-1	strain=MBA-1
GCA_000953115.1	d__Archaea	p__Methanobacteriota	c__Methanobacteria	o__Methanobacteriales	f__Methanobacteriaceae	g__Methanobacterium	s__Methanobacterium formicicum	Methanobacterium formicicum	NA
GCA_000955905.3	d__Archaea	p__Thermoproteota	c__Nitrososphaeria	o__Nitrososphaerales	f__Nitrosopumilaceae	g__Nitrosotenuis	s__Nitrosotenuis cloacae	Candidatus Nitrosotenuis cloacae	strain=SAT1
GCA_000956175.1	d__Archaea	p__Thermoproteota	c__Nitrososphaeria	o__Nitrososphaerales	f__Nitrosopumilaceae	g__Nitrosopumilus	s__Nitrosopumilus adriaticus	Nitrosopumilus adriaticus	strain=NF5
GCA_000960885.1	d__Archaea	p__Thermoproteota	c__Thermoprotei	o__Thermoproteales	f__Thermoproteaceae	g__Thermoproteus	s__Thermoproteus sp000960885	Thermoproteus sp. AZ2	NA
GCA_000961135.2	d__Archaea	p__Thermoproteota	c__Thermoprotei_A	o__Sulfolobales	f__Sulfolobaceae	g__Aramenus	s__Aramenus sulfurataquae	Candidatus Aramenus sulfurataquae	NA
GCA_000965745.1	d__Archaea	p__Thermoplasmatota	c__Thermoplasmata	o__Thermoplasmatales	f__Thermoplasmataceae	g__GCA-965745	s__GCA-965745 sp000965745	uncultured archaeon	NA
GCA_000966265.1	d__Archaea	p__Methanobacteriota_B	c__Thermococci	o__Thermococcales	f__Thermococcaceae	g__Palaeococcus	s__Palaeococcus ferrophilus	Palaeococcus ferrophilus DSM 13482	strain=DSM 13482
GCA_000968355.2	d__Archaea	p__Thermoproteota	c__Thermoprotei_A	o__Sulfolobales	f__Sulfolobaceae	g__Saccharolobus	s__Saccharolobus solfataricus	Saccharolobus solfataricus	strain=SARC-B
GCA_000968395.2	d__Archaea	p__Thermoproteota	c__Thermoprotei_A	o__Sulfolobales	f__Sulfolobaceae	g__Saccharolobus	s__Saccharolobus solfataricus	Saccharolobus solfataricus	strain=SARC-C
GCA_000968435.2	d__Archaea	p__Thermoproteota	c__Thermoprotei_A	o__Sulfolobales	f__Sulfolobaceae	g__Saccharolobus	s__Saccharolobus solfataricus	Saccharolobus solfataricus	strain=SULA
GCA_000969885.1	d__Archaea	p__Halobacteriota	c__Methanosarcinia	o__Methanosarcinales	f__Methanosarcinaceae	g__Methanosarcina	s__Methanosarcina thermophila	Methanosarcina thermophila TM-1	strain=TM-1
GCA_000969905.1	d__Archaea	p__Halobacteriota	c__Methanosarcinia	o__Methanosarcinales	f__Methanosarcinaceae	g__Methanosarcina	s__Methanosarcina vacuolata	Methanosarcina vacuolata Z-761	strain=Z-761
GCA_000969925.1	d__Archaea	p__Halobacteriota	c__Methanosarcinia	o__Methanosarcinales	f__Methanosarcinaceae	g__Methanosarcina	s__Methanosarcina thermophila	Methanosarcina thermophila CHTI-55	strain=CHTI-55
GCA_000969945.1	d__Archaea	p__Halobacteriota	c__Methanosarcinia	o__Methanosarcinales	f__Methanosarcinaceae	g__Methanosarcina	s__Methanosarcina vacuolata	Methanosarcina sp. Kolksee	strain=Kolksee
GCA_000969965.1	d__Archaea	p__Halobacteriota	c__Methanosarcinia	o__Methanosarcinales	f__Methanosarcinaceae	g__Methanosarcina	s__Methanosarcina sp000969965	Methanosarcina sp. WWM596	strain=WWM596
GCA_000969985.1	d__Archaea	p__Halobacteriota	c__Methanosarcinia	o__Methanosarcinales	f__Methanosarcinaceae	g__Methanosarcina	s__Methanosarcina barkeri_B	Methanosarcina barkeri str. Wiesmoor	strain=Wiesmoor
GCA_000970005.1	d__Archaea	p__Halobacteriota	c__Methanosarcinia	o__Methanosarcinales	f__Methanosarcinaceae	g__Methanosarcina	s__Methanosarcina sp000969965	Methanosarcina sp. WH1	strain=WH1
GCA_000970025.1	d__Archaea	p__Halobacteriota	c__Methanosarcinia	o__Methanosarcinales	f__Methanosarcinaceae	g__Methanosarcina	s__Methanosarcina barkeri	Methanosarcina barkeri MS	strain=MS
GCA_000970045.1	d__Archaea	p__Halobacteriota	c__Methanosarcinia	o__Methanosarcinales	f__Methanosarcinaceae	g__MTP4	s__MTP4 sp000970045	Methanosarcina sp. MTP4	strain=MTP4
GCA_000970065.1	d__Archaea	p__Halobacteriota	c__Methanosarcinia	o__Methanosarcinales	f__Methanosarcinaceae	g__Methanosarcina	s__Methanosarcina barkeri	Methanosarcina barkeri 227	strain=227
GCA_000970085.1	d__Archaea	p__Halobacteriota	c__Methanosarcinia	o__Methanosarcinales	f__Methanosarcinaceae	g__Methanosarcina	s__Methanosarcina siciliae	Methanosarcina siciliae T4/M	strain=T4/M
GCA_000970125.1	d__Archaea	p__Halobacteriota	c__Methanosarcinia	o__Methanosarcinales	f__Methanosarcinaceae	g__Methanosarcina	s__Methanosarcina siciliae	Methanosarcina siciliae HI350	strain=HI350
GCA_000970145.1	d__Archaea	p__Halobacteriota	c__Methanosarcinia	o__Methanosarcinales	f__Methanosarcinaceae	g__Methanosarcina	s__Methanosarcina siciliae	Methanosarcina siciliae C2J	strain=C2J
GCA_000970165.1	d__Archaea	p__Halobacteriota	c__Methanosarcinia	o__Methanosarcinales	f__Methanosarcinaceae	g__Methanosarcina	s__Methanosarcina mazei	Methanosarcina mazei WWM610	strain=WWM610
GCA_000970185.1	d__Archaea	p__Halobacteriota	c__Methanosarcinia	o__Methanosarcinales	f__Methanosarcinaceae	g__Methanosarcina	s__Methanosarcina mazei	Methanosarcina mazei SarPi	strain=SarPi
GCA_000970205.1	d__Archaea	p__Halobacteriota	c__Methanosarcinia	o__Methanosarcinales	f__Methanosarcinaceae	g__Methanosarcina	s__Methanosarcina mazei	Methanosarcina mazei S-6	strain=S-6
GCA_000970225.1	d__Archaea	p__Halobacteriota	c__Methanosarcinia	o__Methanosarcinales	f__Methanosarcinaceae	g__Methanosarcina	s__Methanosarcina mazei	Methanosarcina mazei LYC	strain=LYC
GCA_000970245.1	d__Archaea	p__Halobacteriota	c__Methanosarcinia	o__Methanosarcinales	f__Methanosarcinaceae	g__Methanosarcina	s__Methanosarcina mazei	Methanosarcina mazei C16	strain=C16
GCA_000970265.1	d__Archaea	p__Halobacteriota	c__Methanosarcinia	o__Methanosarcinales	f__Methanosarcinaceae	g__Methanosarcina	s__Methanosarcina lacustris	Methanosarcina lacustris Z-7289	strain=Z-7289
GCA_000970285.1	d__Archaea	p__Halobacteriota	c__Methanosarcinia	o__Methanosarcinales	f__Methanosarcinaceae	g__Methanosarcina	s__Methanosarcina horonobensis	Methanosarcina horonobensis HB-1 = JCM 15518	strain=HB-1
GCA_000970305.1	d__Archaea	p__Halobacteriota	c__Methanosarcinia	o__Methanosarcinales	f__Methanosarcinaceae	g__Methanosarcina	s__Methanosarcina barkeri_A	Methanosarcina barkeri 3	strain=3
GCA_000970325.1	d__Archaea	p__Halobacteriota	c__Methanosarcinia	o__Methanosarcinales	f__Methanosarcinaceae	g__Methanococcoides	s__Methanococcoides methylutens_A	Methanococcoides methylutens MM1	strain=MM1
GCA_000978935.1	d__Archaea	p__Halobacteriota	c__Methanosarcinia	o__Methanosarcinales	f__Methanosarcinaceae	g__Methanosarcina	s__Methanosarcina mazei	Methanosarcina mazei	strain=3.F.A.2.5
GCA_000978945.1	d__Archaea	p__Halobacteriota	c__Methanosarcinia	o__Methanosarcinales	f__Methanosarcinaceae	g__Methanosarcina	s__Methanosarcina mazei	Methanosarcina mazei	strain=3.F.A.1A.3
GCA_000978955.1	d__Archaea	p__Halobacteriota	c__Methanosarcinia	o__Methanosarcinales	f__Methanosarcinaceae	g__Methanosarcina	s__Methanosarcina mazei	Methanosarcina mazei	strain=2.F.T.2.6
GCA_000978965.1	d__Archaea	p__Halobacteriota	c__Methanosarcinia	o__Methanosarcinales	f__Methanosarcinaceae	g__Methanosarcina	s__Methanosarcina mazei	Methanosarcina mazei	strain=3.F.T.1A.1
GCA_000979015.1	d__Archaea	p__Halobacteriota	c__Methanosarcinia	o__Methanosarcinales	f__Methanosarcinaceae	g__Methanosarcina	s__Methanosarcina mazei	Methanosarcina mazei	strain=3.H.A.2.1
GCA_000979025.1	d__Archaea	p__Halobacteriota	c__Methanosarcinia	o__Methanosarcinales	f__Methanosarcinaceae	g__Methanosarcina	s__Methanosarcina mazei	Methanosarcina mazei	strain=3.H.A.2.6
GCA_000979035.1	d__Archaea	p__Halobacteriota	c__Methanosarcinia	o__Methanosarcinales	f__Methanosarcinaceae	g__Methanosarcina	s__Methanosarcina mazei	Methanosarcina mazei	strain=3.H.M.1B.1
GCA_000979045.1	d__Archaea	p__Halobacteriota	c__Methanosarcinia	o__Methanosarcinales	f__Methanosarcinaceae	g__Methanosarcina	s__Methanosarcina mazei	Methanosarcina mazei	strain=3.H.M.1B.5
GCA_000979095.1	d__Archaea	p__Halobacteriota	c__Methanosarcinia	o__Methanosarcinales	f__Methanosarcinaceae	g__Methanosarcina	s__Methanosarcina mazei	Methanosarcina mazei	strain=3.H.M.2.7
GCA_000979105.1	d__Archaea	p__Halobacteriota	c__Methanosarcinia	o__Methanosarcinales	f__Methanosarcinaceae	g__Methanosarcina	s__Methanosarcina mazei	Methanosarcina mazei	strain=1.F.A.1A.3
GCA_000979115.1	d__Archaea	p__Halobacteriota	c__Methanosarcinia	o__Methanosarcinales	f__Methanosarcinaceae	g__Methanosarcina	s__Methanosarcina mazei	Methanosarcina mazei	strain=1.F.A.2.8
GCA_000979125.1	d__Archaea	p__Halobacteriota	c__Methanosarcinia	o__Methanosarcinales	f__Methanosarcinaceae	g__Methanosarcina	s__Methanosarcina mazei	Methanosarcina mazei	strain=1.F.M.0.5
GCA_000979175.1	d__Archaea	p__Halobacteriota	c__Methanosarcinia	o__Methanosarcinales	f__Methanosarcinaceae	g__Methanosarcina	s__Methanosarcina mazei	Methanosarcina mazei	strain=1.H.A.1A.3
GCA_000979185.1	d__Archaea	p__Halobacteriota	c__Methanosarcinia	o__Methanosarcinales	f__Methanosarcinaceae	g__Methanosarcina	s__Methanosarcina mazei	Methanosarcina mazei	strain=1.H.A.1A.4
GCA_000979195.1	d__Archaea	p__Halobacteriota	c__Methanosarcinia	o__Methanosarcinales	f__Methanosarcinaceae	g__Methanosarcina	s__Methanosarcina mazei	Methanosarcina mazei	strain=1.H.A.2.3
GCA_000979205.1	d__Archaea	p__Halobacteriota	c__Methanosarcinia	o__Methanosarcinales	f__Methanosarcinaceae	g__Methanosarcina	s__Methanosarcina mazei	Methanosarcina mazei	strain=1.H.A.2.7
GCA_000979255.1	d__Archaea	p__Halobacteriota	c__Methanosarcinia	o__Methanosarcinales	f__Methanosarcinaceae	g__Methanosarcina	s__Methanosarcina mazei	Methanosarcina mazei	strain=1.H.M.1A.2
GCA_000979265.1	d__Archaea	p__Halobacteriota	c__Methanosarcinia	o__Methanosarcinales	f__Methanosarcinaceae	g__Methanosarcina	s__Methanosarcina mazei	Methanosarcina mazei	strain=1.H.M.2.1
GCA_000979275.1	d__Archaea	p__Halobacteriota	c__Methanosarcinia	o__Methanosarcinales	f__Methanosarcinaceae	g__Methanosarcina	s__Methanosarcina mazei	Methanosarcina mazei	strain=1.H.M.2.2
GCA_000979295.1	d__Archaea	p__Halobacteriota	c__Methanosarcinia	o__Methanosarcinales	f__Methanosarcinaceae	g__Methanosarcina	s__Methanosarcina sp000979455	Methanosarcina sp. 1.H.T.1A.1	strain=1.H.T.1A.1
GCA_000979335.1	d__Archaea	p__Halobacteriota	c__Methanosarcinia	o__Methanosarcinales	f__Methanosarcinaceae	g__Methanosarcina	s__Methanosarcina mazei	Methanosarcina mazei	strain=2.F.A.2.3
GCA_000979345.1	d__Archaea	p__Halobacteriota	c__Methanosarcinia	o__Methanosarcinales	f__Methanosarcinaceae	g__Methanosarcina	s__Methanosarcina mazei	Methanosarcina mazei	strain=2.F.A.2.4
GCA_000979375.1	d__Archaea	p__Halobacteriota	c__Methanosarcinia	o__Methanosarcinales	f__Methanosarcinaceae	g__Methanosarcina	s__Methanosarcina mazei	Methanosarcina mazei	strain=2.F.T.0.2
GCA_000979385.1	d__Archaea	p__Halobacteriota	c__Methanosarcinia	o__Methanosarcinales	f__Methanosarcinaceae	g__Methanosarcina	s__Methanosarcina sp000979455	Methanosarcina sp. 2.H.A.1B.4	strain=2.H.A.1B.4
GCA_000979415.1	d__Archaea	p__Halobacteriota	c__Methanosarcinia	o__Methanosarcinales	f__Methanosarcinaceae	g__Methanosarcina	s__Methanosarcina sp000979455	Methanosarcina sp. 2.H.T.1A.15	strain=2.H.T.1A.15
GCA_000979425.1	d__Archaea	p__Halobacteriota	c__Methanosarcinia	o__Methanosarcinales	f__Methanosarcinaceae	g__Methanosarcina	s__Methanosarcina sp000979455	Methanosarcina sp. 2.H.T.1A.3	strain=2.H.T.1A.3
GCA_000979455.1	d__Archaea	p__Halobacteriota	c__Methanosarcinia	o__Methanosarcinales	f__Methanosarcinaceae	g__Methanosarcina	s__Methanosarcina sp000979455	Methanosarcina sp. 2.H.T.1A.6	strain=2.H.T.1A.6
GCA_000979475.1	d__Archaea	p__Halobacteriota	c__Methanosarcinia	o__Methanosarcinales	f__Methanosarcinaceae	g__Methanosarcina	s__Methanosarcina sp000979455	Methanosarcina sp. 2.H.T.1A.8	strain=2.H.T.1A.8
GCA_000979495.1	d__Archaea	p__Halobacteriota	c__Methanosarcinia	o__Methanosarcinales	f__Methanosarcinaceae	g__Methanosarcina	s__Methanosarcina mazei	Methanosarcina mazei	strain=3.F.A.1A.1
GCA_000979505.1	d__Archaea	p__Halobacteriota	c__Methanosarcinia	o__Methanosarcinales	f__Methanosarcinaceae	g__Methanosarcina	s__Methanosarcina mazei	Methanosarcina mazei	strain=3.F.A.1B.1
GCA_000979515.1	d__Archaea	p__Halobacteriota	c__Methanosarcinia	o__Methanosarcinales	f__Methanosarcinaceae	g__Methanosarcina	s__Methanosarcina mazei	Methanosarcina mazei	strain=3.F.A.2.12
GCA_000979555.1	d__Archaea	p__Halobacteriota	c__Methanosarcinia	o__Methanosarcinales	f__Methanosarcinaceae	g__Methanosarcina	s__Methanosarcina mazei	Methanosarcina mazei	strain=3.F.A.2.3
GCA_000979575.1	d__Archaea	p__Halobacteriota	c__Methanosarcinia	o__Methanosarcinales	f__Methanosarcinaceae	g__Methanosarcina	s__Methanosarcina mazei	Methanosarcina mazei	strain=3.F.A.2.6
GCA_000979585.1	d__Archaea	p__Halobacteriota	c__Methanosarcinia	o__Methanosarcinales	f__Methanosarcinaceae	g__Methanosarcina	s__Methanosarcina mazei	Methanosarcina mazei	strain=3.F.A.2.7
GCA_000979595.1	d__Archaea	p__Halobacteriota	c__Methanosarcinia	o__Methanosarcinales	f__Methanosarcinaceae	g__Methanosarcina	s__Methanosarcina mazei	Methanosarcina mazei	strain=3.F.T.1A.2
GCA_000979635.1	d__Archaea	p__Halobacteriota	c__Methanosarcinia	o__Methanosarcinales	f__Methanosarcinaceae	g__Methanosarcina	s__Methanosarcina mazei	Methanosarcina mazei	strain=3.F.T.1A.4
GCA_000979655.1	d__Archaea	p__Halobacteriota	c__Methanosarcinia	o__Methanosarcinales	f__Methanosarcinaceae	g__Methanosarcina	s__Methanosarcina mazei	Methanosarcina mazei	strain=3.H.A.1A.1
GCA_000979665.1	d__Archaea	p__Halobacteriota	c__Methanosarcinia	o__Methanosarcinales	f__Methanosarcinaceae	g__Methanosarcina	s__Methanosarcina mazei	Methanosarcina mazei	strain=3.F.T.2.1
GCA_000979675.1	d__Archaea	p__Halobacteriota	c__Methanosarcinia	o__Methanosarcinales	f__Methanosarcinaceae	g__Methanosarcina	s__Methanosarcina mazei	Methanosarcina mazei	strain=3.H.A.1A.2
GCA_000979685.1	d__Archaea	p__Halobacteriota	c__Methanosarcinia	o__Methanosarcinales	f__Methanosarcinaceae	g__Methanosarcina	s__Methanosarcina mazei	Methanosarcina mazei	strain=3.H.A.2.4
GCA_000979735.1	d__Archaea	p__Halobacteriota	c__Methanosarcinia	o__Methanosarcinales	f__Methanosarcinaceae	g__Methanosarcina	s__Methanosarcina mazei	Methanosarcina mazei	strain=3.H.A.2.5
GCA_000979745.1	d__Archaea	p__Halobacteriota	c__Methanosarcinia	o__Methanosarcinales	f__Methanosarcinaceae	g__Methanosarcina	s__Methanosarcina mazei	Methanosarcina mazei	strain=3.H.A.2.8
GCA_000979755.1	d__Archaea	p__Halobacteriota	c__Methanosarcinia	o__Methanosarcinales	f__Methanosarcinaceae	g__Methanosarcina	s__Methanosarcina mazei	Methanosarcina mazei	strain=3.H.M.1A.1
GCA_000979765.1	d__Archaea	p__Halobacteriota	c__Methanosarcinia	o__Methanosarcinales	f__Methanosarcinaceae	g__Methanosarcina	s__Methanosarcina mazei	Methanosarcina mazei	strain=3.H.M.1B.2
GCA_000979815.1	d__Archaea	p__Halobacteriota	c__Methanosarcinia	o__Methanosarcinales	f__Methanosarcinaceae	g__Methanosarcina	s__Methanosarcina mazei	Methanosarcina mazei	strain=3.H.T.1A.1
GCA_000979825.1	d__Archaea	p__Halobacteriota	c__Methanosarcinia	o__Methanosarcinales	f__Methanosarcinaceae	g__Methanosarcina	s__Methanosarcina mazei	Methanosarcina mazei	strain=3.H.T.1A.2
GCA_000979845.1	d__Archaea	p__Halobacteriota	c__Methanosarcinia	o__Methanosarcinales	f__Methanosarcinaceae	g__Methanosarcina	s__Methanosarcina mazei	Methanosarcina mazei	strain=1.F.A.1B.3
GCA_000979855.1	d__Archaea	p__Halobacteriota	c__Methanosarcinia	o__Methanosarcinales	f__Methanosarcinaceae	g__Methanosarcina	s__Methanosarcina mazei	Methanosarcina mazei	strain=1.F.A.1B.4
GCA_000979895.1	d__Archaea	p__Halobacteriota	c__Methanosarcinia	o__Methanosarcinales	f__Methanosarcinaceae	g__Methanosarcina	s__Methanosarcina mazei	Methanosarcina mazei	strain=1.H.A.0.1
GCA_000979915.1	d__Archaea	p__Halobacteriota	c__Methanosarcinia	o__Methanosarcinales	f__Methanosarcinaceae	g__Methanosarcina	s__Methanosarcina mazei	Methanosarcina mazei	strain=1.H.A.1A.1
GCA_000979925.1	d__Archaea	p__Halobacteriota	c__Methanosarcinia	o__Methanosarcinales	f__Methanosarcinaceae	g__Methanosarcina	s__Methanosarcina mazei	Methanosarcina mazei	strain=1.H.A.1A.6
GCA_000979935.1	d__Archaea	p__Halobacteriota	c__Methanosarcinia	o__Methanosarcinales	f__Methanosarcinaceae	g__Methanosarcina	s__Methanosarcina mazei	Methanosarcina mazei	strain=1.H.A.2.1
GCA_000979975.1	d__Archaea	p__Halobacteriota	c__Methanosarcinia	o__Methanosarcinales	f__Methanosarcinaceae	g__Methanosarcina	s__Methanosarcina sp000979455	Methanosarcina sp. 1.H.A.2.2	strain=1.H.A.2.2
GCA_000979995.1	d__Archaea	p__Halobacteriota	c__Methanosarcinia	o__Methanosarcinales	f__Methanosarcinaceae	g__Methanosarcina	s__Methanosarcina mazei	Methanosarcina mazei	strain=1.H.A.2.6
GCA_000980005.1	d__Archaea	p__Halobacteriota	c__Methanosarcinia	o__Methanosarcinales	f__Methanosarcinaceae	g__Methanosarcina	s__Methanosarcina mazei	Methanosarcina mazei	strain=1.H.A.2.8
GCA_000980025.1	d__Archaea	p__Halobacteriota	c__Methanosarcinia	o__Methanosarcinales	f__Methanosarcinaceae	g__Methanosarcina	s__Methanosarcina mazei	Methanosarcina mazei	strain=1.H.M.0.1
GCA_000980055.1	d__Archaea	p__Halobacteriota	c__Methanosarcinia	o__Methanosarcinales	f__Methanosarcinaceae	g__Methanosarcina	s__Methanosarcina mazei	Methanosarcina mazei	strain=1.H.M.1A.1
GCA_000980075.1	d__Archaea	p__Halobacteriota	c__Methanosarcinia	o__Methanosarcinales	f__Methanosarcinaceae	g__Methanosarcina	s__Methanosarcina mazei	Methanosarcina mazei	strain=1.H.M.2.3
GCA_000980085.1	d__Archaea	p__Halobacteriota	c__Methanosarcinia	o__Methanosarcinales	f__Methanosarcinaceae	g__Methanosarcina	s__Methanosarcina mazei	Methanosarcina mazei	strain=1.H.M.1A.3
GCA_000980105.1	d__Archaea	p__Halobacteriota	c__Methanosarcinia	o__Methanosarcinales	f__Methanosarcinaceae	g__Methanosarcina	s__Methanosarcina mazei	Methanosarcina mazei	strain=1.H.M.2.4
GCA_000980135.1	d__Archaea	p__Halobacteriota	c__Methanosarcinia	o__Methanosarcinales	f__Methanosarcinaceae	g__Methanosarcina	s__Methanosarcina mazei	Methanosarcina mazei	strain=1.H.T.2.1
GCA_000980155.1	d__Archaea	p__Halobacteriota	c__Methanosarcinia	o__Methanosarcinales	f__Methanosarcinaceae	g__Methanosarcina	s__Methanosarcina mazei	Methanosarcina mazei	strain=1.H.T.2.3
GCA_000980175.1	d__Archaea	p__Halobacteriota	c__Methanosarcinia	o__Methanosarcinales	f__Methanosarcinaceae	g__Methanosarcina	s__Methanosarcina mazei	Methanosarcina mazei	strain=1.H.T.2.5
GCA_000993805.1	d__Archaea	p__Thermoproteota	c__Thermoprotei	o__Thermofilales	f__Thermofilaceae	g__Infirmifilum	s__Infirmifilum uzonense	Infirmifilum uzonense	strain=1807-2
GCA_001006045.1	d__Archaea	p__Halobacteriota	c__Archaeoglobi	o__Archaeoglobales	f__Archaeoglobaceae	g__Geoglobus	s__Geoglobus ahangari	Geoglobus ahangari	strain=234
GCA_001006085.1	d__Archaea	p__Thermoproteota	c__Thermoprotei_A	o__Sulfolobales	f__Desulfurococcaceae	g__Desulfurococcus	s__Desulfurococcus mucosus	Desulfurococcus mucosus DSM 2161	strain=DSM 2161
GCA_001011115.1	d__Archaea	p__Halobacteriota	c__Halobacteria	o__Halobacteriales	f__Halobacteriaceae	g__Halanaeroarchaeum	s__Halanaeroarchaeum sulfurireducens	Halanaeroarchaeum sulfurireducens	strain=HSR2
GCA_001017125.1	d__Archaea	p__Halobacteriota	c__Methanomicrobia	o__Methanomicrobiales	f__Methanoculleaceae	g__Methanoculleus	s__Methanoculleus sediminis	Methanoculleus sediminis	strain=S3Fa
GCA_001027005.1	d__Archaea	p__Halobacteriota	c__Methanosarcinia	o__Methanosarcinales	f__Methanosarcinaceae	g__Methanosarcina	s__Methanosarcina barkeri	Methanosarcina barkeri CM1	strain=CM1
GCA_001189275.1	d__Archaea	p__Thermoproteota	c__Thermoprotei	o__Thermoproteales	f__Thermoproteaceae	g__Pyrobaculum	s__Pyrobaculum sp001189275	Pyrobaculum sp. WP30	strain=WP30
GCA_001190965.1	d__Archaea	p__Halobacteriota	c__Halobacteria	o__Halobacteriales	f__Haloferacaceae	g__Haloferax	s__Haloferax gibbonsii	Haloferax gibbonsii	strain=ARA6
GCA_001261915.1	d__Archaea	p__Halobacteriota	c__Halobacteria	o__Halobacteriales	f__Haloferacaceae	g__Halorubrum	s__Halorubrum sp001261915	Halorubrum sp. SD626R	strain=SD626R
GCA_001266655.1	d__Archaea	p__Thermoproteota	c__Thermoprotei_A	o__Sulfolobales	f__Sulfolobaceae	g__Metallosphaera	s__Metallosphaera sedula	Metallosphaera sedula	strain=ARS50-1
GCA_001266675.1	d__Archaea	p__Thermoproteota	c__Thermoprotei_A	o__Sulfolobales	f__Sulfolobaceae	g__Metallosphaera	s__Metallosphaera sedula	Metallosphaera sedula	strain=ARS50-2
GCA_001266695.1	d__Archaea	p__Thermoproteota	c__Thermoprotei_A	o__Sulfolobales	f__Sulfolobaceae	g__Metallosphaera	s__Metallosphaera sedula	Metallosphaera sedula	strain=ARS120-1
GCA_001266715.1	d__Archaea	p__Thermoproteota	c__Thermoprotei_A	o__Sulfolobales	f__Sulfolobaceae	g__Metallosphaera	s__Metallosphaera sedula	Metallosphaera sedula	strain=ARS120-2
GCA_001266735.1	d__Archaea	p__Thermoproteota	c__Thermoprotei_A	o__Sulfolobales	f__Sulfolobaceae	g__Metallosphaera	s__Metallosphaera sedula	Metallosphaera sedula	strain=SARC-M1
GCA_001273335.1	d__Archaea	p__Thermoproteota	c__Bathyarchaeia	o__B26-1	f__UBA233	g__SG8-32-3	s__SG8-32-3 sp001273335	miscellaneous Crenarchaeota group-1 archaeon SG8-32-3	NA
GCA_001273385.1	d__Archaea	p__Thermoproteota	c__Bathyarchaeia	o__B26-1	f__UBA233	g__AD8-1	s__AD8-1 sp001273385	miscellaneous Crenarchaeota group-6 archaeon AD8-1	NA
GCA_001280425.1	d__Archaea	p__Halobacteriota	c__Halobacteria	o__Halobacteriales	f__Haloarculaceae	g__Haloarcula	s__Haloarcula rubripromontorii	Haloarcula rubripromontorii	strain=SL3
GCA_001280455.1	d__Archaea	p__Halobacteriota	c__Halobacteria	o__Halobacteriales	f__Haloferacaceae	g__Halorubrum	s__Halorubrum salinarum	Halorubrum tropicale	strain=5
GCA_001282785.1	d__Archaea	p__Halobacteriota	c__Halobacteria	o__Halobacteriales	f__Haloferacaceae	g__Halolamina	s__Halolamina sediminis	Halolamina sediminis	strain=halo7
GCA_001304615.2	d__Archaea	p__Halobacteriota	c__Methanosarcinia	o__Methanosarcinales	f__Methanosarcinaceae	g__Methanosarcina	s__Methanosarcina flavescens	Methanosarcina flavescens	strain=E03.2
GCA_001305655.1	d__Archaea	p__Halobacteriota	c__Halobacteria	o__Halobacteriales	f__Halobacteriaceae	g__Halanaeroarchaeum	s__Halanaeroarchaeum sulfurireducens	Halanaeroarchaeum sulfurireducens	strain=M27-SA2
GCA_001307315.1	d__Archaea	p__Halobacteriota	c__Halobacteria	o__Halobacteriales	f__Haloferacaceae	g__Halolamina	s__Halolamina pelagica_B	Halolamina pelagica	strain=CDK2
GCA_001315825.1	d__Archaea	p__Thermoproteota	c__Thermoprotei_A	o__Sulfolobales	f__Sulfolobaceae	g__Metallosphaera	s__Metallosphaera hakonensis	Metallosphaera hakonensis JCM 8857 = DSM 7519	strain=JCM 8857
GCA_001315845.1	d__Archaea	p__Methanobacteriota_B	c__Thermococci	o__Thermococcales	f__Thermococcaceae	g__Thermococcus	s__Thermococcus celer	Thermococcus celer Vu 13 = JCM 8558	strain=JCM 8558
GCA_001315865.1	d__Archaea	p__Halobacteriota	c__Methanosarcinia	o__Methanosarcinales	f__Methanosarcinaceae	g__Methanosarcina	s__Methanosarcina mazei	Methanosarcina mazei JCM 9314	strain=JCM 9314
GCA_001315885.1	d__Archaea	p__Methanobacteriota	c__Methanobacteria	o__Methanobacteriales	f__Methanobacteriaceae	g__Methanobrevibacter_C	s__Methanobrevibacter_C arboriphilus_A	Methanobrevibacter arboriphilus JCM 9315	strain=JCM 9315
GCA_001315905.1	d__Archaea	p__Methanobacteriota_B	c__Thermococci	o__Thermococcales	f__Thermococcaceae	g__Thermococcus	s__Thermococcus peptonophilus	Thermococcus peptonophilus OG-1 = JCM 9653	strain=JCM 9653
GCA_001315925.1	d__Archaea	p__Thermoproteota	c__Thermoprotei	o__Thermoproteales	f__Thermocladiaceae	g__Thermocladium	s__Thermocladium modestius	Thermocladium modestius JCM 10088	strain=JCM 10088
GCA_001315945.1	d__Archaea	p__Halobacteriota	c__Methanomicrobia	o__Methanomicrobiales	f__Methanomicrobiaceae	g__Methanogenium	s__Methanogenium cariaci	Methanogenium cariaci JCM 10550	strain=JCM 10550
GCA_001315965.1	d__Archaea	p__Halobacteriota	c__Methanomicrobia	o__Methanomicrobiales	f__Methanoculleaceae	g__Methanoculleus	s__Methanoculleus chikugoensis	Methanoculleus chikugoensis JCM 10825	strain=JCM 10825
GCA_001315985.1	d__Archaea	p__Thermoproteota	c__Thermoprotei	o__Thermoproteales	f__Thermocladiaceae	g__Vulcanisaeta	s__Vulcanisaeta distributa_E	Vulcanisaeta distributa JCM 11216	strain=JCM 11216
GCA_001316005.1	d__Archaea	p__Thermoproteota	c__Thermoprotei	o__Thermoproteales	f__Thermocladiaceae	g__Vulcanisaeta	s__Vulcanisaeta distributa_B	Vulcanisaeta distributa JCM 11217	strain=JCM 11217
GCA_001316025.1	d__Archaea	p__Thermoproteota	c__Thermoprotei	o__Thermoproteales	f__Thermocladiaceae	g__Vulcanisaeta	s__Vulcanisaeta souniana	Vulcanisaeta souniana JCM 11219	strain=JCM 11219
GCA_001316045.1	d__Archaea	p__Thermoproteota	c__Thermoprotei_A	o__Sulfolobales	f__Sulfolobaceae	g__Sulfuracidifex	s__Sulfuracidifex metallicus	Sulfuracidifex metallicus DSM 6482 = JCM 9184	strain=JCM 9184
GCA_001316065.1	d__Archaea	p__Thermoproteota	c__Thermoprotei_A	o__Sulfolobales	f__Acidilobaceae	g__Aeropyrum	s__Aeropyrum camini	Aeropyrum camini SY1 = JCM 12091	strain=JCM 12091
GCA_001316085.1	d__Archaea	p__Thermoproteota	c__Thermoprotei_A	o__Sulfolobales	f__Sulfolobaceae	g__Sulfuracidifex	s__Sulfuracidifex tepidarius	Sulfuracidifex tepidarius	strain=JCM 16833
GCA_001316105.1	d__Archaea	p__Thermoplasmatota	c__Thermoplasmata	o__Thermoplasmatales	f__Thermoplasmataceae	g__Thermogymnomonas	s__Thermogymnomonas acidicola	Thermogymnomonas acidicola JCM 13583	strain=JCM 13583
GCA_001316125.1	d__Archaea	p__Thermoproteota	c__Thermoprotei	o__Thermoproteales	f__Thermocladiaceae	g__Vulcanisaeta	s__Vulcanisaeta distributa_C	Vulcanisaeta distributa JCM 11213	strain=JCM 11213
GCA_001316145.1	d__Archaea	p__Thermoproteota	c__Thermoprotei	o__Thermoproteales	f__Thermocladiaceae	g__Vulcanisaeta	s__Vulcanisaeta distributa	Vulcanisaeta distributa JCM 11215	strain=JCM 11215
GCA_001316165.1	d__Archaea	p__Methanobacteriota_B	c__Thermococci	o__Thermococcales	f__Thermococcaceae	g__Thermococcus	s__Thermococcus kodakarensis	Thermococcus sp. JCM 11816	strain=JCM 11816
GCA_001316185.1	d__Archaea	p__Halobacteriota	c__Halobacteria	o__Halobacteriales	f__Natrialbaceae	g__Natronolimnobius	s__Natronolimnobius baerhuensis	Natronolimnobius baerhuensis JCM 12253 = CGMCC 1.3597	strain=JCM 12253
GCA_001316205.1	d__Archaea	p__Halobacteriota	c__Methanosarcinia	o__Methanosarcinales	f__Methanosarcinaceae	g__Methanosarcina	s__Methanosarcina horonobensis	Methanosarcina horonobensis HB-1 = JCM 15518	strain=JCM 15518
GCA_001316225.1	d__Archaea	p__Thermoplasmatota	c__Thermoplasmata	o__Thermoplasmatales	f__Thermoplasmataceae	g__Acidiplasma	s__Acidiplasma aeolicum	Acidiplasma cupricumulans JCM 13668	strain=JCM 13668
GCA_001316245.1	d__Archaea	p__Thermoproteota	c__Thermoprotei	o__Thermoproteales	f__Thermocladiaceae	g__Vulcanisaeta	s__Vulcanisaeta sp001316245	Vulcanisaeta sp. JCM 14467	strain=JCM 14467
GCA_001316265.1	d__Archaea	p__Thermoproteota	c__Thermoprotei	o__Thermoproteales	f__Thermocladiaceae	g__Vulcanisaeta	s__Vulcanisaeta sp001316265	Vulcanisaeta sp. JCM 16159	strain=JCM 16159
GCA_001316285.1	d__Archaea	p__Thermoproteota	c__Thermoprotei	o__Thermoproteales	f__Thermocladiaceae	g__Vulcanisaeta	s__Vulcanisaeta sp001316285	Vulcanisaeta sp. JCM 16161	strain=JCM 16161
GCA_001316305.1	d__Archaea	p__Halobacteriota	c__Methanosarcinia	o__Methanosarcinales	f__Methanosarcinaceae	g__Methanosarcina	s__Methanosarcina barkeri	Methanosarcina barkeri JCM 10043	strain=JCM 10043
GCA_001316325.1	d__Archaea	p__Methanobacteriota	c__Methanobacteria	o__Methanobacteriales	f__Methanobacteriaceae	g__Methanobacterium	s__Methanobacterium formicicum	Methanobacterium formicicum JCM 10132	strain=JCM 10132
GCA_001316345.1	d__Archaea	p__Methanobacteriota	c__Methanobacteria	o__Methanobacteriales	f__Methanobacteriaceae	g__Methanobrevibacter_C	s__Methanobrevibacter_C arboriphilus	Methanobrevibacter arboriphilus JCM 13429 = DSM 1125	strain=JCM 13429
GCA_001317315.1	d__Archaea	p__Halobacteriota	c__Methanosarcinia	o__Methanosarcinales	f__Methanoperedenaceae	g__Methanoperedens	s__Methanoperedens sp002487355	Candidatus Methanoperedens sp. BLZ1	NA
GCA_001317345.1	d__Archaea	p__Methanobacteriota_B	c__Thermococci	o__Thermococcales	f__Thermococcaceae	g__Thermococcus_A	s__Thermococcus_A sp001317345	Thermococcus sp. EP1	strain=EP1
GCA_001368915.1	d__Archaea	p__Halobacteriota	c__Halobacteria	o__Halobacteriales	f__Haloferacaceae	g__Haloferax	s__Haloferax massiliensis	Haloferax massiliensis	strain=Arc-Hr
GCA_001399695.1	d__Archaea	p__Thermoplasmatota	c__Thermoplasmata	o__Thermoplasmatales	f__Thermoplasmataceae	g__Acidiplasma	s__Acidiplasma aeolicum	Acidiplasma aeolicum	strain=V
GCA_001399795.1	d__Archaea	p__Thermoproteota	c__Bathyarchaeia	o__B26-1	f__BA1	g__BA2	s__BA2 sp001399795	Candidatus Bathyarchaeota archaeon BA2	NA
GCA_001399805.1	d__Archaea	p__Thermoproteota	c__Bathyarchaeia	o__B26-1	f__BA1	g__BA1	s__BA1 sp001399805	Candidatus Bathyarchaeota archaeon BA1	NA
GCA_001402855.1	d__Archaea	p__Halobacteriota	c__Methanosarcinia	o__Methanosarcinales	f__Methanosarcinaceae	g__Methanosarcina	s__Methanosarcina thermophila	Methanosarcina sp. 795	NA
GCA_001402935.1	d__Archaea	p__Thermoplasmatota	c__Thermoplasmata	o__Thermoplasmatales	f__Thermoplasmataceae	g__Acidiplasma	s__Acidiplasma aeolicum	Acidiplasma cupricumulans	strain=BH2
GCA_001402945.1	d__Archaea	p__Thermoplasmatota	c__Thermoplasmata	o__Thermoplasmatales	f__Thermoplasmataceae	g__Acidiplasma	s__Acidiplasma aeolicum	Acidiplasma aeolicum	strain=VT
GCA_001412335.1	d__Archaea	p__Halobacteriota	c__Methanomicrobia	o__Methanomicrobiales	f__Methanoregulaceae	g__SD8	s__SD8 sp001412335	Methanolinea sp. SDB	NA
GCA_001412355.1	d__Archaea	p__Halobacteriota	c__Methanomicrobia	o__Methanomicrobiales	f__Methanomicrobiaceae	g__LKUD01	s__LKUD01 sp001412355	Methanoculleus sp. SDB	NA
GCA_001412615.1	d__Archaea	p__Thermoproteota	c__Thermoprotei_A	o__Sulfolobales	f__Pyrodictiaceae	g__Pyrodictium	s__Pyrodictium delaneyi	Pyrodictium delaneyi	strain=Su06
GCA_001418715.1	d__Archaea	p__Methanobacteriota_B	c__Thermococci	o__Thermococcales	f__Thermococcaceae	g__Thermococcus	s__Thermococcus thioreducens	Thermococcus thioreducens	strain=DSM 14981
GCA_001421175.1	d__Archaea	p__Thermoplasmatota	c__Thermoplasmata	o__Methanomassiliicoccales	f__Methanomethylophilaceae	g__RumEn-M2	s__RumEn-M2 sp001421175	Methanomassiliicoccales archaeon RumEn M2	NA
GCA_001421185.1	d__Archaea	p__Thermoplasmatota	c__Thermoplasmata	o__Methanomassiliicoccales	f__Methanomassiliicoccaceae	g__DTU008	s__DTU008 sp001421185	Methanomassiliicoccales archaeon RumEn M1	NA
GCA_001433455.1	d__Archaea	p__Methanobacteriota_B	c__Thermococci	o__Thermococcales	f__Thermococcaceae	g__Thermococcus_B	s__Thermococcus_B barophilus	Thermococcus barophilus	strain=CH5
GCA_001437625.1	d__Archaea	p__Thermoproteota	c__Nitrososphaeria	o__Nitrososphaerales	f__Nitrosopumilaceae	g__Nitrosopumilus	s__Nitrosopumilus sp001437625	Nitrosopumilus sp. BACL13 MAG-121220-bin23	NA
GCA_001443365.1	d__Archaea	p__Thermoproteota	c__Nitrososphaeria	o__Nitrososphaerales	f__Nitrosopumilaceae	g__CSP1-1	s__CSP1-1 sp001443365	Thaumarchaeota archaeon CSP1-1	NA
GCA_001458655.1	d__Archaea	p__Methanobacteriota	c__Methanobacteria	o__Methanobacteriales	f__Methanobacteriaceae	g__Methanobacterium	s__Methanobacterium formicicum	Methanobacterium formicicum	NA
GCA_001462205.1	d__Archaea	p__Halobacteriota	c__Halobacteria	o__Halobacteriales	f__Haloferacaceae	g__Haloparvum	s__Haloparvum sedimenti	Haloparvum sedimenti	strain=DYS4
GCA_001462395.1	d__Archaea	p__Thermoproteota	c__Thermoprotei_A	o__Sulfolobales	f__Pyrodictiaceae	g__Pyrodictium	s__Pyrodictium occultum	Pyrodictium occultum	strain=PL-19
GCA_001469865.1	d__Archaea	p__Halobacteriota	c__Halobacteria	o__Halobacteriales	f__Haloferacaceae	g__Haloferax	s__Haloferax profundi	Haloferax profundi	strain=SB29
GCA_001469875.2	d__Archaea	p__Halobacteriota	c__Halobacteria	o__Halobacteriales	f__Haloferacaceae	g__Haloferax	s__Haloferax marisrubri	Haloferax marisrubri	strain=SB3
GCA_001469955.1	d__Archaea	p__Halobacteriota	c__Halobacteria	o__Halobacteriales	f__Haloferacaceae	g__Haloprofundus	s__Haloprofundus marisrubri	Haloprofundus marisrubri	strain=SB9
GCA_001477655.1	d__Archaea	p__Methanobacteriota	c__Methanobacteria	o__Methanobacteriales	f__Methanobacteriaceae	g__Methanobrevibacter_A	s__Methanobrevibacter_A millerae_A	Methanobrevibacter millerae	strain=SM9
GCA_001481295.1	d__Archaea	p__Thermoplasmatota	c__Thermoplasmata	o__Methanomassiliicoccales	f__Methanomethylophilaceae	g__Methanomethylophilus	s__Methanomethylophilus sp001481295	Candidatus Methanomethylophilus sp. 1R26	strain=1R26
GCA_001481595.1	d__Archaea	p__Thermoproteota	c__Thermoprotei_A	o__Sulfolobales	f__Sulfolobaceae	g__Sulfolobus	s__Sulfolobus acidocaldarius	Sulfolobus acidocaldarius	strain=GG12-C01-09
GCA_001481635.1	d__Archaea	p__Thermoproteota	c__Thermoprotei_A	o__Sulfolobales	f__Sulfolobaceae	g__Sulfolobus	s__Sulfolobus acidocaldarius	Sulfolobus acidocaldarius	strain=NG05B_CO5_07
GCA_001481685.1	d__Archaea	p__Thermoproteota	c__Thermoprotei_A	o__Sulfolobales	f__Ignicoccaceae	g__Ignicoccus	s__Ignicoccus islandicus	Ignicoccus islandicus DSM 13165	strain=DSM 13165
GCA_001482285.1	d__Archaea	p__Halobacteriota	c__Halobacteria	o__Halobacteriales	f__Haloferacaceae	g__Haloferax	s__Haloferax sp001482285	Haloferax sp. Q22	strain=Q22
GCA_001484195.1	d__Archaea	p__Methanobacteriota_B	c__Thermococci	o__Thermococcales	f__Thermococcaceae	g__Thermococcus	s__Thermococcus celericrescens	Thermococcus celericrescens	strain=DSM 17994
GCA_001484685.1	d__Archaea	p__Methanobacteriota_B	c__Thermococci	o__Thermococcales	f__Thermococcaceae	g__Thermococcus_A	s__Thermococcus_A sp001484685	Thermococcus sp. 2319x1	strain=2319x1
GCA_001485535.1	d__Archaea	p__Halobacteriota	c__Halobacteria	o__Halobacteriales	f__Halobacteriaceae	g__Halobacterium	s__Halobacterium sp001485535	Halobacterium sp. CBA1132	strain=CBA1132
GCA_001485555.1	d__Archaea	p__Halobacteriota	c__Halobacteria	o__Halobacteriales	f__Haloarculaceae	g__Haloarcula	s__Haloarcula hispanica	Haloarcula sp. CBA1128	strain=CBA1128
GCA_001485575.1	d__Archaea	p__Halobacteriota	c__Halobacteria	o__Halobacteriales	f__Haloarculaceae	g__Haloarcula	s__Haloarcula sp001485575	Haloarcula sp. CBA1127	strain=CBA1127
GCA_001488575.1	d__Archaea	p__Halobacteriota	c__Halobacteria	o__Halobacteriales	f__Halobacteriaceae	g__Halobacterium	s__Halobacterium hubeiense	Halobacterium hubeiense	strain=JI20-1
GCA_001507935.1	d__Archaea	p__Methanobacteriota_B	c__Thermococci	o__Thermococcales	f__Thermococcaceae	g__Thermococcus_A	s__Thermococcus_A sp001507935	Thermococcales archaeon 44_46	NA
GCA_001507955.1	d__Archaea	p__Methanobacteriota	c__Methanobacteria	o__Methanobacteriales	f__Methanothermobacteraceae_A	g__Methanothermobacter_A	s__Methanothermobacter_A sp001507955	Methanobacteriaceae archaeon 41_258	NA
GCA_001507975.1	d__Archaea	p__Halobacteriota	c__Methanosarcinia_A	o__Methanosarcinales_A	f__Methermicoccaceae	g__Methermicoccus	s__Methermicoccus shengliensis	Euryarchaeota archaeon 55_53	NA
GCA_001508065.1	d__Archaea	p__Methanobacteriota_B	c__Thermococci	o__Thermococcales	f__Thermococcaceae	g__Thermococcus_A	s__Thermococcus_A sibiricus	Thermococcus sibiricus	NA
GCA_001508175.1	d__Archaea	p__Methanobacteriota_B	c__Thermococci	o__Thermococcales	f__Thermococcaceae	g__Thermococcus_A	s__Thermococcus_A sibiricus	Thermococcus sp. 40_45	NA
GCA_001508185.1	d__Archaea	p__Halobacteriota	c__Methanosarcinia_A	o__Methanosarcinales_A	f__Methermicoccaceae	g__Methermicoccus	s__Methermicoccus shengliensis	Methanosarcinales archeaon 56_1174	NA
GCA_001508455.1	d__Archaea	p__Halobacteriota	c__Methanomicrobia	o__Methanomicrobiales	f__Methanocorpusculaceae	g__Methanocalculus	s__Methanocalculus sp9912u	Methanocalculus sp. 52_23	NA
GCA_001508615.1	d__Archaea	p__Halobacteriota	c__Methanosarcinia	o__Methanotrichales	f__Methanotrichaceae	g__Methanothrix_A	s__Methanothrix_A harundinacea_D	Methanothrix harundinacea	NA
GCA_001508665.1	d__Archaea	p__Halobacteriota	c__Methanomicrobia	o__Methanomicrobiales	f__Methanoculleaceae	g__Methanoculleus	s__Methanoculleus marisnigri_B	Methanoculleus marisnigri	NA
GCA_001508745.1	d__Archaea	p__Halobacteriota	c__Archaeoglobi	o__Archaeoglobales	f__Archaeoglobaceae	g__Archaeoglobus	s__Archaeoglobus fulgidus	Archaeoglobus fulgidus	NA
GCA_001508815.1	d__Archaea	p__Halobacteriota	c__Archaeoglobi	o__Archaeoglobales	f__Archaeoglobaceae	g__Archaeoglobus	s__Archaeoglobus fulgidus	Archaeoglobus fulgidus	NA
GCA_001509005.1	d__Archaea	p__Methanobacteriota	c__Methanobacteria	o__Methanobacteriales	f__Methanobacteriaceae	g__Methanobacterium	s__Methanobacterium formicicum	Methanobacterium sp. 42_16	NA
GCA_001509255.1	d__Archaea	p__Halobacteriota	c__Methanomicrobia	o__Methanomicrobiales	f__Methanoculleaceae	g__Methanoculleus	s__Methanoculleus marisnigri_B	Methanoculleus marisnigri	NA
GCA_001509375.1	d__Archaea	p__Halobacteriota	c__Methanosarcinia	o__Methanotrichales	f__Methanotrichaceae	g__Methanothrix_A	s__Methanothrix_A harundinacea_D	Methanothrix harundinacea	NA
GCA_001510225.1	d__Archaea	p__Thermoproteota	c__Nitrososphaeria	o__Nitrososphaerales	f__Nitrosopumilaceae	g__Nitrosopumilus	s__Nitrosopumilus limneticus	Thaumarchaeota archaeon casp-thauma1	NA
GCA_001510275.1	d__Archaea	p__Thermoproteota	c__Nitrososphaeria	o__Nitrososphaerales	f__Nitrosopumilaceae	g__Nitrosopumilus	s__Nitrosopumilus sp001510275	Thaumarchaeota archaeon casp-thauma3	NA
GCA_001510295.1	d__Archaea	p__Thermoproteota	c__Nitrososphaeria	o__Nitrososphaerales	f__Nitrosopumilaceae	g__Nitrosopelagicus	s__Nitrosopelagicus sp001510295	Thaumarchaeota archaeon casp-thauma4	NA
GCA_001512365.1	d__Archaea	p__Halobacteriota	c__Methanosarcinia	o__Methanosarcinales	f__Methanosarcinaceae	g__Methanosarcina	s__Methanosarcina thermophila	Methanosarcina sp. DTU009	NA
GCA_001512375.1	d__Archaea	p__Halobacteriota	c__Methanomicrobia	o__Methanomicrobiales	f__Methanoculleaceae	g__Methanoculleus	s__Methanoculleus thermohydrogenotrophicum	Candidatus Methanoculleus thermohydrogenotrophicum	NA
GCA_001512385.1	d__Archaea	p__Halobacteriota	c__Methanomicrobia	o__Methanomicrobiales	f__Methanoculleaceae	g__Methanoculleus	s__Methanoculleus thermophilus	Methanoculleus sp. DTU007	NA
GCA_001512965.1	d__Archaea	p__Thermoplasmatota	c__Thermoplasmata	o__Methanomassiliicoccales	f__Methanomassiliicoccaceae	g__DTU008	s__DTU008 sp001512965	Methanomicrobia archaeon DTU008	NA
GCA_001515185.1	d__Archaea	p__Hadarchaeota	c__Hadarchaeia	o__Hadarchaeales	f__Hadarchaeaceae	g__DG-33	s__DG-33 sp001515185	Hadesarchaea archaeon DG-33	NA
GCA_001515205.2	d__Archaea	p__Hadarchaeota	c__Hadarchaeia	o__Hadarchaeales	f__Hadarchaeaceae	g__Hadarchaeum	s__Hadarchaeum yellowstonense	Candidatus Hadarchaeum yellowstonense	NA
GCA_001516585.1	d__Archaea	p__Thermoproteota	c__Thermoprotei	o__Thermoproteales	f__Thermocladiaceae	g__Thermocladium	s__Thermocladium sp001516585	Thermocladium sp. ECH_B	NA
GCA_001516655.1	d__Archaea	p__Thermoproteota	c__Thermoprotei	o__Thermoproteales	f__Thermoproteaceae	g__Thermoproteus	s__Thermoproteus sp002077075	Thermoproteus sp. JCHS_4	NA
GCA_001516665.1	d__Archaea	p__Thermoproteota	c__Thermoprotei	o__Thermoproteales	f__Thermoproteaceae	g__Thermoproteus	s__Thermoproteus sp002077075	Thermoproteus sp. CIS_19	NA
GCA_001516705.1	d__Archaea	p__Thermoproteota	c__Thermoprotei	o__Thermoproteales	f__Thermocladiaceae	g__Vulcanisaeta	s__Vulcanisaeta sp001516765	Vulcanisaeta sp. JCHS_4	NA
GCA_001516725.1	d__Archaea	p__Thermoproteota	c__Thermoprotei	o__Thermoproteales	f__Thermocladiaceae	g__Caldivirga	s__Caldivirga sp001663375	Caldivirga sp. MG_3	NA
GCA_001516765.1	d__Archaea	p__Thermoproteota	c__Thermoprotei	o__Thermoproteales	f__Thermocladiaceae	g__Vulcanisaeta	s__Vulcanisaeta sp001516765	Vulcanisaeta sp. MG_3	NA
GCA_001541925.1	d__Archaea	p__Thermoproteota	c__Nitrososphaeria	o__Nitrososphaerales	f__Nitrosopumilaceae	g__Nitrosopumilus	s__Nitrosopumilus sp001541925	Nitrosopumilus sp. Nsub	strain=Nsub
GCA_001542905.1	d__Archaea	p__Halobacteriota	c__Halobacteria	o__Halobacteriales	f__Haloferacaceae	g__Halorubrum	s__Halorubrum aethiopicum	Halorubrum aethiopicum	strain=SAH-A6
GCA_001543015.1	d__Archaea	p__Thermoproteota	c__Nitrososphaeria	o__Nitrososphaerales	f__Nitrosopumilaceae	g__Nitrosopumilus	s__Nitrosopumilus sp001543015	Nitrosopumilus sp. LS_AOA	NA
GCA_001548675.1	d__Archaea	p__Methanobacteriota	c__Methanobacteria	o__Methanobacteriales	f__Methanobacteriaceae	g__Methanobrevibacter_A	s__Methanobrevibacter_A sp001548675	Methanobrevibacter sp. YE315	strain=YE315
GCA_001552015.1	d__Archaea	p__Nanoarchaeota	c__Nanoarchaeia	o__Nanoarchaeales	f__Nanopusillaceae	g__Nanopusillus	s__Nanopusillus acidilobi	Candidatus Nanopusillus acidilobi	strain=7A
GCA_001559955.1	d__Archaea	p__Thermoproteota	c__Thermoprotei_A	o__Sulfolobales	f__Sulfolobaceae	g__Sulfolobus	s__Sulfolobus acidocaldarius	Sulfolobus acidocaldarius	strain=GG12-C01-01
GCA_001559965.1	d__Archaea	p__Thermoproteota	c__Thermoprotei_A	o__Sulfolobales	f__Sulfolobaceae	g__Sulfolobus	s__Sulfolobus acidocaldarius	Sulfolobus acidocaldarius	strain=GG12-C01-03
GCA_001559975.1	d__Archaea	p__Thermoproteota	c__Thermoprotei_A	o__Sulfolobales	f__Sulfolobaceae	g__Sulfolobus	s__Sulfolobus acidocaldarius	Sulfolobus acidocaldarius	strain=GG12-C01-02
GCA_001559985.1	d__Archaea	p__Thermoproteota	c__Thermoprotei_A	o__Sulfolobales	f__Sulfolobaceae	g__Sulfolobus	s__Sulfolobus acidocaldarius	Sulfolobus acidocaldarius	strain=GG12-C01-04
GCA_001560035.1	d__Archaea	p__Thermoproteota	c__Thermoprotei_A	o__Sulfolobales	f__Sulfolobaceae	g__Sulfolobus	s__Sulfolobus acidocaldarius	Sulfolobus acidocaldarius	strain=GG12-C01-05
GCA_001560045.1	d__Archaea	p__Thermoproteota	c__Thermoprotei_A	o__Sulfolobales	f__Sulfolobaceae	g__Sulfolobus	s__Sulfolobus acidocaldarius	Sulfolobus acidocaldarius	strain=GG12-C01-07
GCA_001560065.1	d__Archaea	p__Thermoproteota	c__Thermoprotei_A	o__Sulfolobales	f__Sulfolobaceae	g__Sulfolobus	s__Sulfolobus acidocaldarius	Sulfolobus acidocaldarius	strain=GG12-C01-08
GCA_001560085.1	d__Archaea	p__Thermoproteota	c__Thermoprotei_A	o__Sulfolobales	f__Sulfolobaceae	g__Sulfolobus	s__Sulfolobus acidocaldarius	Sulfolobus acidocaldarius	strain=GG12-C01-10
GCA_001560115.1	d__Archaea	p__Thermoproteota	c__Thermoprotei_A	o__Sulfolobales	f__Sulfolobaceae	g__Sulfolobus	s__Sulfolobus acidocaldarius	Sulfolobus acidocaldarius	strain=GG12-C01-11
GCA_001560125.1	d__Archaea	p__Thermoproteota	c__Thermoprotei_A	o__Sulfolobales	f__Sulfolobaceae	g__Sulfolobus	s__Sulfolobus acidocaldarius	Sulfolobus acidocaldarius	strain=GG12-C01-12
GCA_001560135.1	d__Archaea	p__Thermoproteota	c__Thermoprotei_A	o__Sulfolobales	f__Sulfolobaceae	g__Sulfolobus	s__Sulfolobus acidocaldarius	Sulfolobus acidocaldarius	strain=GG12-C01-13
GCA_001560165.1	d__Archaea	p__Thermoproteota	c__Thermoprotei_A	o__Sulfolobales	f__Sulfolobaceae	g__Sulfolobus	s__Sulfolobus acidocaldarius	Sulfolobus acidocaldarius	strain=GG12-C01-14
GCA_001560195.1	d__Archaea	p__Thermoproteota	c__Thermoprotei_A	o__Sulfolobales	f__Sulfolobaceae	g__Sulfolobus	s__Sulfolobus acidocaldarius	Sulfolobus acidocaldarius	strain=GG12-C01-15
GCA_001560205.1	d__Archaea	p__Thermoproteota	c__Thermoprotei_A	o__Sulfolobales	f__Sulfolobaceae	g__Sulfolobus	s__Sulfolobus acidocaldarius	Sulfolobus acidocaldarius	strain=GG12-C01-16
GCA_001560215.1	d__Archaea	p__Thermoproteota	c__Thermoprotei_A	o__Sulfolobales	f__Sulfolobaceae	g__Sulfolobus	s__Sulfolobus acidocaldarius	Sulfolobus acidocaldarius	strain=GG12-C01-17
GCA_001560245.1	d__Archaea	p__Thermoproteota	c__Thermoprotei_A	o__Sulfolobales	f__Sulfolobaceae	g__Sulfolobus	s__Sulfolobus acidocaldarius	Sulfolobus acidocaldarius	strain=GG12-C01-18
GCA_001560275.1	d__Archaea	p__Thermoproteota	c__Thermoprotei_A	o__Sulfolobales	f__Sulfolobaceae	g__Sulfolobus	s__Sulfolobus acidocaldarius	Sulfolobus acidocaldarius	strain=GG12-C01-20
GCA_001560285.1	d__Archaea	p__Thermoproteota	c__Thermoprotei_A	o__Sulfolobales	f__Sulfolobaceae	g__Sulfolobus	s__Sulfolobus acidocaldarius	Sulfolobus acidocaldarius	strain=GG12-C01-21
GCA_001560305.1	d__Archaea	p__Thermoproteota	c__Thermoprotei_A	o__Sulfolobales	f__Sulfolobaceae	g__Sulfolobus	s__Sulfolobus acidocaldarius	Sulfolobus acidocaldarius	strain=GG12-C01-22
GCA_001560315.1	d__Archaea	p__Thermoproteota	c__Thermoprotei_A	o__Sulfolobales	f__Sulfolobaceae	g__Sulfolobus	s__Sulfolobus acidocaldarius	Sulfolobus acidocaldarius	strain=NG05A_C04
GCA_001560355.1	d__Archaea	p__Thermoproteota	c__Thermoprotei_A	o__Sulfolobales	f__Sulfolobaceae	g__Sulfolobus	s__Sulfolobus acidocaldarius	Sulfolobus acidocaldarius	strain=NG05A_C05_01
GCA_001560375.1	d__Archaea	p__Thermoproteota	c__Thermoprotei_A	o__Sulfolobales	f__Sulfolobaceae	g__Sulfolobus	s__Sulfolobus acidocaldarius	Sulfolobus acidocaldarius	strain=NG05B_C03_01
GCA_001560385.1	d__Archaea	p__Thermoproteota	c__Thermoprotei_A	o__Sulfolobales	f__Sulfolobaceae	g__Sulfolobus	s__Sulfolobus acidocaldarius	Sulfolobus acidocaldarius	strain=NG05B_C06_02
GCA_001560405.1	d__Archaea	p__Thermoproteota	c__Thermoprotei_A	o__Sulfolobales	f__Sulfolobaceae	g__Sulfolobus	s__Sulfolobus acidocaldarius	Sulfolobus acidocaldarius	strain=NG05B_C06_03
GCA_001560435.1	d__Archaea	p__Thermoproteota	c__Thermoprotei_A	o__Sulfolobales	f__Sulfolobaceae	g__Sulfolobus	s__Sulfolobus acidocaldarius	Sulfolobus acidocaldarius	strain=NG05B_C06_04
GCA_001560455.1	d__Archaea	p__Thermoproteota	c__Thermoprotei_A	o__Sulfolobales	f__Sulfolobaceae	g__Sulfolobus	s__Sulfolobus acidocaldarius	Sulfolobus acidocaldarius	strain=NG05B_C06_05
GCA_001560465.1	d__Archaea	p__Thermoproteota	c__Thermoprotei_A	o__Sulfolobales	f__Sulfolobaceae	g__Sulfolobus	s__Sulfolobus acidocaldarius	Sulfolobus acidocaldarius	strain=NG05B_C06_06
GCA_001560485.1	d__Archaea	p__Thermoproteota	c__Thermoprotei_A	o__Sulfolobales	f__Sulfolobaceae	g__Sulfolobus	s__Sulfolobus acidocaldarius	Sulfolobus acidocaldarius	strain=NG05B_C06_07
GCA_001560515.1	d__Archaea	p__Thermoproteota	c__Thermoprotei_A	o__Sulfolobales	f__Sulfolobaceae	g__Sulfolobus	s__Sulfolobus acidocaldarius	Sulfolobus acidocaldarius	strain=NG05B_C06_11
GCA_001560525.1	d__Archaea	p__Thermoproteota	c__Thermoprotei_A	o__Sulfolobales	f__Sulfolobaceae	g__Sulfolobus	s__Sulfolobus acidocaldarius	Sulfolobus acidocaldarius	strain=NG05B_C06_12
GCA_001560555.1	d__Archaea	p__Thermoproteota	c__Thermoprotei_A	o__Sulfolobales	f__Sulfolobaceae	g__Sulfolobus	s__Sulfolobus acidocaldarius	Sulfolobus acidocaldarius	strain=NG05B_C06_13
GCA_001560565.1	d__Archaea	p__Thermoproteota	c__Thermoprotei_A	o__Sulfolobales	f__Sulfolobaceae	g__Sulfolobus	s__Sulfolobus acidocaldarius	Sulfolobus acidocaldarius	strain=NG05B_CO5_01
GCA_001560595.1	d__Archaea	p__Thermoproteota	c__Thermoprotei_A	o__Sulfolobales	f__Sulfolobaceae	g__Sulfolobus	s__Sulfolobus acidocaldarius	Sulfolobus acidocaldarius	strain=NG05B_CO5_02
GCA_001560605.1	d__Archaea	p__Thermoproteota	c__Thermoprotei_A	o__Sulfolobales	f__Sulfolobaceae	g__Sulfolobus	s__Sulfolobus acidocaldarius	Sulfolobus acidocaldarius	strain=NG05B_CO5_03
GCA_001560635.1	d__Archaea	p__Thermoproteota	c__Thermoprotei_A	o__Sulfolobales	f__Sulfolobaceae	g__Sulfolobus	s__Sulfolobus acidocaldarius	Sulfolobus acidocaldarius	strain=NG05B_CO5_04
GCA_001560645.1	d__Archaea	p__Thermoproteota	c__Thermoprotei_A	o__Sulfolobales	f__Sulfolobaceae	g__Sulfolobus	s__Sulfolobus acidocaldarius	Sulfolobus acidocaldarius	strain=NG05B_CO5_05
GCA_001560675.1	d__Archaea	p__Thermoproteota	c__Thermoprotei_A	o__Sulfolobales	f__Sulfolobaceae	g__Sulfolobus	s__Sulfolobus acidocaldarius	Sulfolobus acidocaldarius	strain=NG05B_CO5_06
GCA_001560685.1	d__Archaea	p__Thermoproteota	c__Thermoprotei_A	o__Sulfolobales	f__Sulfolobaceae	g__Sulfolobus	s__Sulfolobus acidocaldarius	Sulfolobus acidocaldarius	strain=NG05B_CO5_08
GCA_001560715.1	d__Archaea	p__Thermoproteota	c__Thermoprotei_A	o__Sulfolobales	f__Sulfolobaceae	g__Sulfolobus	s__Sulfolobus acidocaldarius	Sulfolobus acidocaldarius	strain=NG05B_CO5_09
GCA_001560725.1	d__Archaea	p__Thermoproteota	c__Thermoprotei_A	o__Sulfolobales	f__Sulfolobaceae	g__Sulfolobus	s__Sulfolobus acidocaldarius	Sulfolobus acidocaldarius	strain=NG05B_CO5_10
GCA_001560755.1	d__Archaea	p__Thermoproteota	c__Thermoprotei_A	o__Sulfolobales	f__Sulfolobaceae	g__Sulfolobus	s__Sulfolobus acidocaldarius	Sulfolobus acidocaldarius	strain=NG05B_CO5_11
GCA_001560765.1	d__Archaea	p__Thermoproteota	c__Thermoprotei_A	o__Sulfolobales	f__Sulfolobaceae	g__Sulfolobus	s__Sulfolobus acidocaldarius	Sulfolobus acidocaldarius	strain=NG05B_CO5_12
GCA_001560795.1	d__Archaea	p__Thermoproteota	c__Thermoprotei_A	o__Sulfolobales	f__Sulfolobaceae	g__Sulfolobus	s__Sulfolobus acidocaldarius	Sulfolobus acidocaldarius	strain=NG05B_CO5_13
GCA_001560815.1	d__Archaea	p__Thermoproteota	c__Thermoprotei_A	o__Sulfolobales	f__Sulfolobaceae	g__Sulfolobus	s__Sulfolobus acidocaldarius	Sulfolobus acidocaldarius	strain=NG05B_CO5_14
GCA_001560835.1	d__Archaea	p__Thermoproteota	c__Thermoprotei_A	o__Sulfolobales	f__Sulfolobaceae	g__Sulfolobus	s__Sulfolobus acidocaldarius	Sulfolobus acidocaldarius	strain=NG05B_CO5_15
GCA_001560915.1	d__Archaea	p__Thermoplasmatota	c__Thermoplasmata	o__Methanomassiliicoccales	f__Methanomethylophilaceae	g__Methanomethylophilus	s__Methanomethylophilus sp001560915	methanogenic archaeon ISO4-H5	strain=ISO4-H5
GCA_001563245.1	d__Archaea	p__Methanobacteriota	c__Methanobacteria	o__Methanobacteriales	f__Methanobacteriaceae	g__Methanobrevibacter	s__Methanobrevibacter olleyae	Methanobrevibacter olleyae	strain=YLM1
GCA_001563305.1	d__Archaea	p__Thermoplasmatota	c__Thermoplasmata	o__Methanomassiliicoccales	f__Methanomethylophilaceae	g__UBA71	s__UBA71 sp001563305	methanogenic archaeon mixed culture ISO4-G1	NA
GCA_001563325.1	d__Archaea	p__Asgardarchaeota	c__Thorarchaeia	o__Thorarchaeales	f__Thorarchaeaceae	g__SMTZ1-83	s__SMTZ1-83 sp001563325	Candidatus Thorarchaeota archaeon SMTZ1-83	NA
GCA_001563335.1	d__Archaea	p__Asgardarchaeota	c__Thorarchaeia	o__Thorarchaeales	f__Thorarchaeaceae	g__SMTZ1-45	s__SMTZ1-45 sp001563335	Candidatus Thorarchaeota archaeon SMTZ1-45	NA
GCA_001563795.1	d__Archaea	p__Halobacteriota	c__Halobacteria	o__Halobacteriales	f__Haloferacaceae	g__Halohasta	s__Halohasta sp001563795	Haloferacaceae archaeon B1-Br10_E2g22	NA
GCA_001563805.1	d__Archaea	p__Halobacteriota	c__Halobacteria	o__Halobacteriales	f__Natrialbaceae	g__Natrarchaeobaculum	s__Natrarchaeobaculum sp001563805	Natrialbaceae archaeon B1-Br10_E2g2	NA
GCA_001563875.1	d__Archaea	p__Nanohaloarchaeota	c__Nanosalinia	o__Nanosalinales	f__Nanosalinaceae	g__B1-Br10-U2g19	s__B1-Br10-U2g19 sp001563875	Nanohaloarchaea archaeon B1-Br10_U2g1	NA
GCA_001563885.1	d__Archaea	p__Halobacteriota	c__Halobacteria	o__Halobacteriales	f__Natrialbaceae	g__Natrarchaeobaculum	s__Natrarchaeobaculum sp001563885	Natrialbaceae archaeon B1-Br10_E2g27	NA
GCA_001563905.1	d__Archaea	p__Nanohaloarchaeota	c__Nanosalinia	o__Nanosalinales	f__Nanosalinaceae	g__B1-Br10-U2g19	s__B1-Br10-U2g19 sp001563905	Nanohaloarchaea archaeon B1-Br10_U2g19	NA
GCA_001563915.1	d__Archaea	p__Nanohaloarchaeota	c__Nanosalinia	o__Nanosalinales	f__Nanosalinaceae	g__B1-Br10-U2g21	s__B1-Br10-U2g21 sp001563915	Nanohaloarchaea archaeon B1-Br10_U2g21	NA
GCA_001563965.1	d__Archaea	p__Halobacteriota	c__Halobacteria	o__Halobacteriales	f__Haloferacaceae	g__PL-Br10-E2g29	s__PL-Br10-E2g29 sp001563965	Haloferacaceae archaeon PL-Br10_E2g29	NA
GCA_001563995.1	d__Archaea	p__Nanohaloarchaeota	c__Nanosalinia	o__Nanosalinales	f__Nanosalinaceae	g__PL-Br10-U2g16	s__PL-Br10-U2g16 sp001563995	Nanohaloarchaea archaeon PL-Br10_U2g16	NA
GCA_001564005.1	d__Archaea	p__Halobacteriota	c__Halobacteria	o__Halobacteriales	f__Haloferacaceae	g__Halorubrum	s__Halorubrum sp001564205	Halorubrum sp. PL-Br10_E2g5	NA
GCA_001564035.1	d__Archaea	p__Nanohaloarchaeota	c__Nanosalinia	o__Nanosalinales	f__Nanosalinaceae	g__B1-Br10-U2g21	s__B1-Br10-U2g21 sp001564035	Nanohaloarchaea archaeon PL-Br10_U2g27	NA
GCA_001564115.1	d__Archaea	p__Halobacteriota	c__Halobacteria	o__Halobacteriales	f__Natrialbaceae	g__Tc-Br11-E2g8	s__Tc-Br11-E2g8 sp001564115	Natrialbaceae archaeon Tc-Br11_E2g8	NA
GCA_001564135.1	d__Archaea	p__Halobacteriota	c__Halobacteria	o__Halobacteriales	f__Haloarculaceae	g__Halovenus	s__Halovenus sp001564135	Halobacteriaceae archaeon Tc-Br11_E2g27	NA
GCA_001564145.1	d__Archaea	p__Nanohaloarchaeota	c__Nanosalinia	o__Nanosalinales	f__Nanosalinaceae	g__B1-Br10-U2g21	s__B1-Br10-U2g21 sp001564145	Nanohaloarchaea archaeon B1-Br10_U2g29	NA
GCA_001564195.1	d__Archaea	p__Nanohaloarchaeota	c__Nanosalinia	o__Nanosalinales	f__Nanosalinaceae	g__B1-Br10-U2g19	s__B1-Br10-U2g19 sp001563875	Nanohaloarchaea archaeon PL-Br10_U2g19	NA
GCA_001564205.1	d__Archaea	p__Halobacteriota	c__Halobacteria	o__Halobacteriales	f__Haloferacaceae	g__Halorubrum	s__Halorubrum sp001564205	Nanohaloarchaea archaeon PL-Br10_U2g5	NA
GCA_001564255.1	d__Archaea	p__Halobacteriota	c__Halobacteria	o__Halobacteriales	f__Natrialbaceae	g__Tc-Br11-E2g1	s__Tc-Br11-E2g1 sp001564255	Natrialbaceae archaeon Tc-Br11_E2g1	NA
GCA_001564275.1	d__Archaea	p__Halobacteriota	c__Halobacteria	o__Halobacteriales	f__Natrialbaceae	g__Tc-Br11	s__Tc-Br11 sp001564275	Natrialbaceae archaeon Tc-Br11_E2g14	NA
GCA_001564285.1	d__Archaea	p__Halobacteriota	c__Halobacteria	o__Halobacteriales	f__Natrialbaceae	g__Tc-Br11	s__Tc-Br11 sp003552325	Natrialbaceae archaeon Tc-Br11_E2g28	NA
GCA_001571385.1	d__Archaea	p__Halobacteriota	c__Methanomicrobia	o__Methanomicrobiales	f__Methanofollaceae	g__Methanofollis	s__Methanofollis ethanolicus	Methanofollis ethanolicus	strain=HASU
GCA_001571405.1	d__Archaea	p__Halobacteriota	c__Methanomicrobia	o__Methanomicrobiales	f__Methanoculleaceae	g__Methanoculleus	s__Methanoculleus thermophilus	Methanoculleus thermophilus	strain=CR-1
GCA_001577555.1	d__Archaea	p__Halobacteriota	c__Methanosarcinia	o__Methanosarcinales	f__Methanosarcinaceae	g__Methanohalophilus	s__Methanohalophilus euhalobius	Methanohalophilus sp. T328-1	NA
GCA_001577565.1	d__Archaea	p__Halobacteriota	c__Methanosarcinia	o__Methanosarcinales	f__Methanosarcinaceae	g__Methanolobus	s__Methanolobus zinderi	Methanolobus sp. T82-4	NA
GCA_001577775.1	d__Archaea	p__Methanobacteriota_B	c__Thermococci	o__Thermococcales	f__Thermococcaceae	g__Pyrococcus	s__Pyrococcus kukulkanii	Pyrococcus kukulkanii	strain=NCB100
GCA_001587575.1	d__Archaea	p__Methanobacteriota_B	c__Thermococci	o__Methanofastidiosales	f__Methanofastidiosaceae	g__Methanofastidiosum	s__Methanofastidiosum sp001587575	Candidatus Methanofastidiosum methylthiophilus	NA
GCA_001587595.1	d__Archaea	p__Methanobacteriota_B	c__Thermococci	o__Methanofastidiosales	f__Methanofastidiosaceae	g__Methanofastidiosum	s__Methanofastidiosum sp001587595	Candidatus Methanofastidiosum methylthiophilus	NA
GCA_001587605.1	d__Archaea	p__Methanobacteriota_B	c__Thermococci	o__Methanofastidiosales	f__Methanofastidiosaceae	g__Methanofastidiosum	s__Methanofastidiosum sp001587595	Candidatus Methanofastidiosum methylthiophilus	NA
GCA_001587635.1	d__Archaea	p__Methanobacteriota_B	c__Thermococci	o__Methanofastidiosales	f__Methanofastidiosaceae	g__Methanofastidiosum	s__Methanofastidiosum sp001587595	Candidatus Methanofastidiosum methylthiophilus	NA
GCA_001587655.1	d__Archaea	p__Methanobacteriota_B	c__Thermococci	o__Methanofastidiosales	f__Methanofastidiosaceae	g__Methanofastidiosum	s__Methanofastidiosum sp001587575	Candidatus Methanofastidiosum methylthiophilus	NA
GCA_001587675.1	d__Archaea	p__Methanobacteriota_B	c__Thermococci	o__Methanofastidiosales	f__Methanofastidiosaceae	g__Methanofastidiosum	s__Methanofastidiosum sp001587675	Candidatus Methanofastidiosum methylthiophilus	NA
GCA_001587695.1	d__Archaea	p__Methanobacteriota_B	c__Thermococci	o__Methanofastidiosales	f__Methanofastidiosaceae	g__Methanofastidiosum	s__Methanofastidiosum sp001587575	Candidatus Methanofastidiosum methylthiophilus	NA
GCA_001587715.1	d__Archaea	p__Methanobacteriota_B	c__Thermococci	o__Methanofastidiosales	f__Methanofastidiosaceae	g__Methanofastidiosum	s__Methanofastidiosum sp001587715	Candidatus Methanofastidiosum methylthiophilus	NA
GCA_001592435.1	d__Archaea	p__Methanobacteriota_B	c__Thermococci	o__Thermococcales	f__Thermococcaceae	g__Thermococcus	s__Thermococcus peptonophilus	Thermococcus peptonophilus	strain=OG-1
GCA_001593845.1	d__Archaea	p__Thermoproteota	c__Bathyarchaeia	o__B26-1	f__B26-1	g__B63	s__B63 sp001593845	Candidatus Bathyarchaeota archaeon B63	NA
GCA_001593855.1	d__Archaea	p__Thermoproteota	c__Bathyarchaeia	o__B25	f__B25	g__B25	s__B25 sp001593855	Candidatus Bathyarchaeota archaeon B25	NA
GCA_001593865.1	d__Archaea	p__Thermoproteota	c__Bathyarchaeia	o__B24	f__B24	g__B24	s__B24 sp001593865	Candidatus Bathyarchaeota archaeon B24	NA
GCA_001593875.1	d__Archaea	p__Thermoproteota	c__Bathyarchaeia	o__TCS64	f__B23	g__B23	s__B23 sp001593875	Candidatus Bathyarchaeota archaeon B23	NA
GCA_001593925.1	d__Archaea	p__Thermoproteota	c__Bathyarchaeia	o__B26-1	f__B26-1	g__B26-1	s__B26-1 sp001593925	Candidatus Bathyarchaeota archaeon B26-1	NA
GCA_001593935.1	d__Archaea	p__Thermoproteota	c__Bathyarchaeia	o__B26-1	f__B26-1	g__B26-1	s__B26-1 sp001593935	Candidatus Bathyarchaeota archaeon B26-2	NA
GCA_001593955.1	d__Archaea	p__Halobacteriota	c__Halobacteria	o__Halobacteriales	f__Halalkalicoccaceae	g__Halalkalicoccus	s__Halalkalicoccus paucihalophilus	Halalkalicoccus paucihalophilus	strain=DSM 24557
GCA_001595785.1	d__Archaea	p__Nanoarchaeota	c__Nanoarchaeia	o__Woesearchaeales	f__SM23-78	g__SM23-78	s__SM23-78 sp001595785	Euryarchaeota archaeon SM23-78	NA
GCA_001595885.1	d__Archaea	p__Thermoplasmatota	c__Thermoplasmata	o__SG8-5	f__SG8-5	g__SG8-5	s__SG8-5 sp001595885	Candidatus Proteinoplasmatales archaeon SG8-5	NA
GCA_001595915.1	d__Archaea	p__Thermoplasmatota	c__E2	o__DHVEG-1	f__DHVEG-1	g__SG8-52-3	s__SG8-52-3 sp001595915	Thermoplasmatales archaeon SG8-52-3	NA
GCA_001595945.1	d__Archaea	p__Thermoplasmatota	c__E2	o__DHVEG-1	f__DHVEG-1	g__SM1-50	s__SM1-50 sp001595945	Thermoplasmatales archaeon SM1-50	NA
GCA_001602375.1	d__Archaea	p__Halobacteriota	c__Methanomicrobia	o__Methanomicrobiales	f__Methanoculleaceae	g__Methanoculleus	s__Methanoculleus horonobensis	Methanoculleus horonobensis	strain=T10
GCA_001602645.1	d__Archaea	p__Halobacteriota	c__Methanosarcinia	o__Methanotrichales	f__Methanotrichaceae	g__Methanothrix_A	s__Methanothrix_A sp001602645	Methanosarcinales archaeon Methan_01	NA
GCA_001603195.1	d__Archaea	p__Halobacteriota	c__Methanosarcinia	o__Methanotrichales	f__Methanotrichaceae	g__Methanothrix_A	s__Methanothrix_A harundinacea_E	Methanosarcinales archaeon Methan_02	NA
GCA_001603225.1	d__Archaea	p__Halobacteriota	c__Methanosarcinia	o__Methanotrichales	f__Methanotrichaceae	g__Methanothrix	s__Methanothrix soehngenii	Methanosarcinales archaeon Methan_04	NA
GCA_001625445.1	d__Archaea	p__Halobacteriota	c__Halobacteria	o__Halobacteriales	f__Haladaptataceae	g__Haladaptatus	s__Haladaptatus sp001625445	Haladaptatus sp. R4	strain=R4
GCA_001627015.1	d__Archaea	p__Thermoproteota	c__Nitrososphaeria	o__Nitrososphaerales	f__Nitrosopumilaceae	g__Nitrosopelagicus	s__Nitrosopelagicus sp001627235	Nitrosopelagicus sp. REDSEA-S43_B1	NA
GCA_001627075.1	d__Archaea	p__Thermoproteota	c__Nitrososphaeria	o__Nitrososphaerales	f__Nitrosopumilaceae	g__Nitrosopelagicus	s__Nitrosopelagicus sp001627235	Nitrosopelagicus sp. REDSEA-S25_B3	NA
GCA_001627095.1	d__Archaea	p__Thermoproteota	c__Nitrososphaeria	o__Nitrososphaerales	f__Nitrosopumilaceae	g__Nitrosopelagicus	s__Nitrosopelagicus sp001627235	Nitrosopelagicus sp. REDSEA-S37_B6	NA
GCA_001627235.1	d__Archaea	p__Thermoproteota	c__Nitrososphaeria	o__Nitrososphaerales	f__Nitrosopumilaceae	g__Nitrosopelagicus	s__Nitrosopelagicus sp001627235	Nitrosopelagicus sp. REDSEA-S31_B2	NA
GCA_001628435.1	d__Archaea	p__Thermoplasmatota	c__Poseidoniia	o__Poseidoniales	f__Thalassarchaeaceae	g__MGIIb-O1	s__MGIIb-O1 sp002502175	Marine group II euryarchaeote REDSEA-S03_B6	NA
GCA_001628455.1	d__Archaea	p__Thermoplasmatota	c__Poseidoniia	o__Poseidoniales	f__Thalassarchaeaceae	g__MGIIb-O3	s__MGIIb-O3 sp001628485	Marine group II euryarchaeote REDSEA-S10_B2	NA
GCA_001628475.1	d__Archaea	p__Thermoplasmatota	c__Poseidoniia	o__Poseidoniales	f__Thalassarchaeaceae	g__MGIIb-O3	s__MGIIb-O3 sp002725315	Marine group II euryarchaeote REDSEA-S19_B7N8	NA
GCA_001628485.1	d__Archaea	p__Thermoplasmatota	c__Poseidoniia	o__Poseidoniales	f__Thalassarchaeaceae	g__MGIIb-O3	s__MGIIb-O3 sp001628485	Marine group II euryarchaeote REDSEA-S11_B3N4	NA
GCA_001629155.1	d__Archaea	p__Thermoplasmatota	c__Poseidoniia	o__Poseidoniales	f__Thalassarchaeaceae	g__MGIIb-O3	s__MGIIb-O3 sp001629255	Marine group II euryarchaeote REDSEA-S29_B8N9	NA
GCA_001629165.1	d__Archaea	p__Thermoplasmatota	c__Poseidoniia	o__Poseidoniales	f__Thalassarchaeaceae	g__MGIIb-O3	s__MGIIb-O3 sp002725315	Marine group II euryarchaeote REDSEA-S25_B4N5	NA
GCA_001629185.2	d__Archaea	p__Thermoplasmatota	c__Poseidoniia	o__Poseidoniales	f__Thalassarchaeaceae	g__MGIIb-O3	s__MGIIb-O3 sp001629235	Marine group II euryarchaeote REDSEA-S37_B2N9	NA
GCA_001629205.1	d__Archaea	p__Thermoplasmatota	c__Poseidoniia	o__Poseidoniales	f__Thalassarchaeaceae	g__MGIIb-O3	s__MGIIb-O3 sp001629205	Marine group II euryarchaeote REDSEA-S30_B12	NA
GCA_001629235.1	d__Archaea	p__Thermoplasmatota	c__Poseidoniia	o__Poseidoniales	f__Thalassarchaeaceae	g__MGIIb-O3	s__MGIIb-O3 sp001629235	Marine group II euryarchaeote REDSEA-S43_B8	NA
GCA_001629245.1	d__Archaea	p__Thermoplasmatota	c__Poseidoniia	o__Poseidoniales	f__Thalassarchaeaceae	g__MGIIb-O3	s__MGIIb-O3 sp001629235	Marine group II euryarchaeote REDSEA-S41_B6	NA
GCA_001629255.1	d__Archaea	p__Thermoplasmatota	c__Poseidoniia	o__Poseidoniales	f__Thalassarchaeaceae	g__MGIIb-O3	s__MGIIb-O3 sp001629255	Marine group II euryarchaeote REDSEA-S42_B7	NA
GCA_001629295.1	d__Archaea	p__Thermoplasmatota	c__Poseidoniia	o__Poseidoniales	f__Thalassarchaeaceae	g__MGIIb-O3	s__MGIIb-O3 sp001629255	Marine group II euryarchaeote REDSEA-S40_B11N13	NA
GCA_001639265.1	d__Archaea	p__Methanobacteriota	c__Methanobacteria	o__Methanobacteriales	f__Methanobacteriaceae	g__Methanobrevibacter_D	s__Methanobrevibacter_D filiformis	Methanobrevibacter filiformis	strain=DSM 11501
GCA_001639275.1	d__Archaea	p__Methanobacteriota	c__Methanobacteria	o__Methanobacteriales	f__Methanobacteriaceae	g__Methanobrevibacter_A	s__Methanobrevibacter_A oralis	Methanobrevibacter oralis	strain=DSM 7256
GCA_001639285.1	d__Archaea	p__Methanobacteriota	c__Methanobacteria	o__Methanobacteriales	f__Methanobacteriaceae	g__Methanobrevibacter_C	s__Methanobrevibacter_C cuticularis	Methanobrevibacter cuticularis	strain=DSM 11139
GCA_001639295.1	d__Archaea	p__Methanobacteriota	c__Methanobacteria	o__Methanobacteriales	f__Methanobacteriaceae	g__Methanobrevibacter_D	s__Methanobrevibacter_D curvatus	Methanobrevibacter curvatus	strain=DSM 11111
GCA_001647085.1	d__Archaea	p__Methanobacteriota_B	c__Thermococci	o__Thermococcales	f__Thermococcaceae	g__Thermococcus	s__Thermococcus piezophilus	Thermococcus piezophilus	strain=CDGS
GCA_001647155.1	d__Archaea	p__Halobacteriota	c__Halobacteria	o__Halobacteriales	f__Haloarculaceae	g__Haloarcula	s__Haloarcula hispanica	Haloarcula sp. K1	strain=K1
GCA_001663375.1	d__Archaea	p__Thermoproteota	c__Thermoprotei	o__Thermoproteales	f__Thermocladiaceae	g__Caldivirga	s__Caldivirga sp001663375	Caldivirga sp. MU80	strain=MU80
GCA_001683555.1	d__Archaea	p__Halobacteriota	c__Methanosarcinia	o__Methanosarcinales	f__Methanosarcinaceae	g__Methanohalophilus	s__Methanohalophilus euhalobius	Methanohalophilus sp. DAL1	NA
GCA_001714685.2	d__Archaea	p__Halobacteriota	c__Methanosarcinia	o__Methanosarcinales	f__Methanosarcinaceae	g__Methanosarcina	s__Methanosarcina sp001714685	Methanosarcina sp. Ant1	NA
GCA_001717005.1	d__Archaea	p__Thermoproteota	c__Methanomethylicia	o__Methanomethylicales	f__Methanomethylicaceae	g__Methanomethylicus	s__Methanomethylicus mesodigestus	Candidatus Methanomethylicus mesodigestus	NA
GCA_001717015.1	d__Archaea	p__Thermoproteota	c__Methanomethylicia	o__Methanomethylicales	f__Methanomethylicaceae	g__Methanosuratincola	s__Methanosuratincola petrocarbonis	Candidatus Methanosuratincola petrocarbonis	NA
GCA_001717025.1	d__Archaea	p__Thermoproteota	c__Methanomethylicia	o__Methanomethylicales	f__Methanomethylicaceae	g__Methanomethylicus	s__Methanomethylicus oleisabuli	Candidatus Methanomethylicus oleisabuli	NA
GCA_001717035.1	d__Archaea	p__Thermoproteota	c__Methanomethylicia	o__Methanomethylicales	f__Methanomethylicaceae	g__Methanomethylicus	s__Methanomethylicus mesodigestus	Candidatus Methanomethylicus mesodigestus	NA
GCA_001719125.1	d__Archaea	p__Thermoproteota	c__Thermoprotei_A	o__Sulfolobales	f__Sulfolobaceae	g__Saccharolobus	s__Saccharolobus sp001719125	Sulfolobus sp. A20	strain=A20
GCA_001723155.1	d__Archaea	p__Halobacteriota	c__Halobacteria	o__Halobacteriales	f__Haladaptataceae	g__Haladaptatus	s__Haladaptatus paucihalophilus	Haladaptatus sp. W1	strain=W1
GCA_001723835.1	d__Archaea	p__Altiarchaeota	c__Altiarchaeia	o__IMC4	f__MCBC01	g__MCBC01	s__MCBC01 sp001723855	Candidatus Altiarchaeales archaeon WOR_SM1_79	NA
GCA_001723845.1	d__Archaea	p__Altiarchaeota	c__Altiarchaeia	o__IMC4	f__WOR-SM1-SCG	g__WOR-SM1-SCG	s__WOR-SM1-SCG sp001723845	Candidatus Altiarchaeales archaeon WOR_SM1_SCG	NA
GCA_001723855.1	d__Archaea	p__Altiarchaeota	c__Altiarchaeia	o__IMC4	f__MCBC01	g__MCBC01	s__MCBC01 sp001723855	Candidatus Altiarchaeales archaeon WOR_SM1_86-2	NA
GCA_001726015.1	d__Archaea	p__Halobacteriota	c__Methanosarcinia	o__Methanosarcinales	f__Methanosarcinaceae	g__Methanohalophilus	s__Methanohalophilus euhalobius	Methanohalophilus sp. 2-GBenrich	NA
GCA_001729285.1	d__Archaea	p__Methanobacteriota	c__Methanobacteria	o__Methanobacteriales	f__Methanobacteriaceae	g__Methanobacterium_D	s__Methanobacterium_D bryantii	Methanobacterium sp. A39	strain=A39
GCA_001729375.1	d__Archaea	p__Halobacteriota	c__Methanosarcinia	o__Methanosarcinales	f__Methanosarcinaceae	g__Methanosarcina	s__Methanosarcina barkeri	Methanosarcina sp. A14	strain=A14
GCA_001729385.1	d__Archaea	p__Methanobacteriota	c__Methanobacteria	o__Methanobacteriales	f__Methanobacteriaceae	g__Methanobrevibacter_A	s__Methanobrevibacter_A gottschalkii	Methanobrevibacter sp. A27	strain=A27
GCA_001729395.1	d__Archaea	p__Methanobacteriota	c__Methanobacteria	o__Methanobacteriales	f__Methanobacteriaceae	g__Methanosphaera	s__Methanosphaera stadtmanae	Methanosphaera sp. A6	strain=A6
GCA_001729455.1	d__Archaea	p__Methanobacteriota	c__Methanobacteria	o__Methanobacteriales	f__Methanobacteriaceae	g__Methanobrevibacter_A	s__Methanobrevibacter_A smithii	Methanobrevibacter sp. A54	strain=A54
GCA_001729965.1	d__Archaea	p__Methanobacteriota	c__Methanobacteria	o__Methanobacteriales	f__Methanobacteriaceae	g__Methanosphaera	s__Methanosphaera sp001729965	Methanosphaera sp. WGK6	strain=WGK6
GCA_001742785.1	d__Archaea	p__Altiarchaeota	c__Altiarchaeia	o__IMC4	f__IMC4	g__IMC4	s__IMC4 sp001742785	Candidatus Altiarchaeales archaeon IMC4	NA
GCA_001748385.1	d__Archaea	p__Thermoproteota	c__Thermoprotei	o__Thermoproteales	f__Thermocladiaceae	g__Vulcanisaeta_B	s__Vulcanisaeta_B thermophila	Vulcanisaeta thermophila	strain=CBA1501
GCA_001761425.1	d__Archaea	p__Nanohaloarchaeota	c__Nanosalinia	o__Nanosalinales	f__Nanosalinaceae	g__Nanohalobium	s__Nanohalobium sp001761425	Nanohaloarchaea archaeon SG9	NA
GCA_001766815.1	d__Archaea	p__Halobacteriota	c__Syntropharchaeia	o__Syntropharchaeales	f__Syntropharchaeaceae	g__Syntropharchaeum_A	s__Syntropharchaeum_A caldarius	Candidatus Syntrophoarchaeum caldarius	NA
GCA_001766825.1	d__Archaea	p__Halobacteriota	c__Syntropharchaeia	o__Syntropharchaeales	f__Syntropharchaeaceae	g__Syntropharchaeum	s__Syntropharchaeum butanivorans	Candidatus Syntrophoarchaeum butanivorans	NA
GCA_001767315.1	d__Archaea	p__Halobacteriota	c__Halobacteria	o__Halobacteriales	f__Halobacteriaceae	g__Halodesulfurarchaeum	s__Halodesulfurarchaeum formicicum	Halodesulfurarchaeum formicicum	strain=HTSR1
GCA_001768965.1	d__Archaea	p__Thermoproteota	c__Bathyarchaeia	o__40CM-2-53-6	f__FEN-987	g__FEN-987	s__FEN-987 sp001768965	archaeon RBG_16_50_20	NA
GCA_001774245.1	d__Archaea	p__Thermoproteota	c__Bathyarchaeia	o__TCS64	f__TCS64	g__UBA8941	s__UBA8941 sp001774245	Candidatus Bathyarchaeota archaeon RBG_13_52_12	NA
GCA_001775955.1	d__Archaea	p__Thermoproteota	c__Bathyarchaeia	o__40CM-2-53-6	f__RBG-13-38-9	g__RBG-13-38-9	s__RBG-13-38-9 sp001775955	Candidatus Bathyarchaeota archaeon RBG_13_38_9	NA
GCA_001775965.1	d__Archaea	p__Thermoproteota	c__Bathyarchaeia	o__TCS64	f__TCS64	g__RBG-16-57-9	s__RBG-16-57-9 sp001775965	Candidatus Bathyarchaeota archaeon RBG_13_60_20	NA
GCA_001775995.1	d__Archaea	p__Thermoproteota	c__Bathyarchaeia	o__RBG-16-48-13	f__RBG-16-48-13	g__RBG-16-48-13	s__RBG-16-48-13 sp001775995	Candidatus Bathyarchaeota archaeon RBG_16_48_13	NA
GCA_001776015.1	d__Archaea	p__Thermoproteota	c__Bathyarchaeia	o__TCS64	f__TCS64	g__RBG-16-57-9	s__RBG-16-57-9 sp001775965	Candidatus Bathyarchaeota archaeon RBG_16_57_9	NA
GCA_001784635.1	d__Archaea	p__Aenigmatarchaeota	c__Aenigmatarchaeia	o__CG10238-14	f__CG10238-14	g__RBG-16-49-10	s__RBG-16-49-10 sp001784635	Candidatus Micrarchaeota archaeon RBG_16_49_10	NA
GCA_001786395.1	d__Archaea	p__Nanoarchaeota	c__Nanoarchaeia	o__Pacearchaeales	f__GW2011-AR1	g__MFWN01	s__MFWN01 sp001786395	Candidatus Pacearchaeota archaeon RBG_13_36_9	NA
GCA_001786415.1	d__Archaea	p__Nanoarchaeota	c__Nanoarchaeia	o__Pacearchaeales	f__GW2011-AR1	g__RBG-13-33-26	s__RBG-13-33-26 sp001786415	Candidatus Pacearchaeota archaeon RBG_19FT_COMBO_34_9	NA
GCA_001787285.1	d__Archaea	p__Nanoarchaeota	c__Nanoarchaeia	o__Pacearchaeales	f__GW2011-AR1	g__RBG-13-33-26	s__RBG-13-33-26 sp001786415	Candidatus Pacearchaeota archaeon RBG_13_33_26	NA
GCA_001800675.1	d__Archaea	p__Thermoplasmatota	c__Thermoplasmata	o__UBA10834	f__UBA10834	g__COMBO-56-21	s__COMBO-56-21 sp001800675	Euryarchaeota archaeon RBG_13_57_23	NA
GCA_001800745.1	d__Archaea	p__Thermoplasmatota	c__Thermoplasmata	o__RBG-16-68-12	f__RBG-16-68-12	g__RBG-16-68-12	s__RBG-16-68-12 sp001800745	Euryarchaeota archaeon RBG_16_67_27	NA
GCA_001800815.1	d__Archaea	p__Thermoplasmatota	c__Thermoplasmata	o__UBA10834	f__UBA10834	g__COMBO-56-21	s__COMBO-56-21 sp001800815	Euryarchaeota archaeon RBG_19FT_COMBO_56_21	NA
GCA_001800825.1	d__Archaea	p__Thermoplasmatota	c__Thermoplasmata	o__RBG-16-68-12	f__RBG-16-68-12	g__RBG-16-68-12	s__RBG-16-68-12 sp001800825	Euryarchaeota archaeon RBG_19FT_COMBO_69_17	NA
GCA_001856825.1	d__Archaea	p__Thermoplasmatota	c__Thermoplasmata	o__Thermoplasmatales	f__GCA-001856825	g__GCA-001856825	s__GCA-001856825 sp001856825	Thermoplasmatales archaeon I-plasma	NA
GCA_001856845.1	d__Archaea	p__Thermoplasmatota	c__Thermoplasmata	o__Thermoplasmatales	f__Thermoplasmataceae	g__Cuniculiplasma	s__Cuniculiplasma divulgatum	Thermoplasmatales archaeon Gpl	NA
GCA_001861355.1	d__Archaea	p__Halobacteriota	c__Halobacteria	o__Halobacteriales	f__Natrialbaceae	g__Natrialba	s__Natrialba sp001861355	Natrialba sp. SSL1	strain=SSL1
GCA_001870125.1	d__Archaea	p__Thermoproteota	c__Nitrososphaeria	o__Nitrososphaerales	f__Nitrososphaeraceae	g__Nitrosocosmicus	s__Nitrosocosmicus hydrocola	Candidatus Nitrosocosmicus hydrocola	strain=G61
GCA_001871415.1	d__Archaea	p__Nanoarchaeota	c__Nanoarchaeia	o__Woesearchaeales	f__CG1-02-57-44	g__CG1-02-57-44	s__CG1-02-57-44 sp001871415	Candidatus Woesearchaeota archaeon CG1_02_57_44	NA
GCA_001871475.1	d__Archaea	p__Micrarchaeota	c__Micrarchaeia	o__Anstonellales	f__CG1-02-47-40	g__CG1-02-47-40	s__CG1-02-47-40 sp001871475	Candidatus Micrarchaeota archaeon CG1_02_47_40	NA
GCA_001871495.1	d__Archaea	p__Micrarchaeota	c__Micrarchaeia	o__Norongarragalinales	f__UBA8480	g__UBA8480	s__UBA8480 sp001871495	Candidatus Micrarchaeota archaeon CG1_02_51_15	NA
GCA_001871535.1	d__Archaea	p__Micrarchaeota	c__Micrarchaeia	o__Anstonellales	f__UBA8471	g__UBA8471	s__UBA8471 sp001871535	Candidatus Micrarchaeota archaeon CG1_02_49_24	NA
GCA_001871595.1	d__Archaea	p__Micrarchaeota	c__Micrarchaeia	o__Norongarragalinales	f__UBA97	g__UBA97	s__UBA97 sp001871595	Candidatus Micrarchaeota archaeon CG1_02_55_22	NA
GCA_001871605.1	d__Archaea	p__Micrarchaeota	c__Micrarchaeia	o__Norongarragalinales	f__Norongarragalinaceae	g__UBA95	s__UBA95 sp002499405	Candidatus Micrarchaeota archaeon CG1_02_55_41	NA
GCA_001871655.1	d__Archaea	p__Micrarchaeota	c__Micrarchaeia	o__Norongarragalinales	f__Norongarragalinaceae	g__UBA93	s__UBA93 sp002792915	Candidatus Micrarchaeota archaeon CG1_02_60_51	NA
GCA_001872125.1	d__Archaea	p__Nanoarchaeota	c__Nanoarchaeia	o__Pacearchaeales	f__GW2011-AR1	g__GW2011-AR1	s__GW2011-AR1 sp002762735	Candidatus Pacearchaeota archaeon CG1_02_30_18	NA
GCA_001872145.1	d__Archaea	p__Nanoarchaeota	c__Nanoarchaeia	o__Pacearchaeales	f__CG1-02-31-27	g__CG1-02-31-27	s__CG1-02-31-27 sp002763115	Candidatus Pacearchaeota archaeon CG1_02_31_27	NA
GCA_001872185.1	d__Archaea	p__Nanoarchaeota	c__Nanoarchaeia	o__Pacearchaeales	f__GW2011-AR1	g__MNVX01	s__MNVX01 sp001872185	Candidatus Pacearchaeota archaeon CG1_02_32_21	NA
GCA_001872315.1	d__Archaea	p__Nanoarchaeota	c__Nanoarchaeia	o__Pacearchaeales	f__GW2011-AR1	g__CG1-02-39-14	s__CG1-02-39-14 sp001872315	Candidatus Pacearchaeota archaeon CG1_02_39_14	NA
GCA_001872325.1	d__Archaea	p__Nanoarchaeota	c__Nanoarchaeia	o__Pacearchaeales	f__GW2011-AR1	g__CG1-02-35-32	s__CG1-02-35-32 sp002792635	Candidatus Pacearchaeota archaeon CG1_02_35_32	NA
GCA_001872765.1	d__Archaea	p__Nanoarchaeota	c__Nanoarchaeia	o__Woesearchaeales	f__CG1-02-33-12	g__CG1-02-33-12	s__CG1-02-33-12 sp002762865	Candidatus Woesearchaeota archaeon CG1_02_33_12	NA
GCA_001872795.1	d__Archaea	p__Nanoarchaeota	c__Nanoarchaeia	o__Pacearchaeales	f__GW2011-AR1	g__UBA92	s__UBA92 sp002497285	Candidatus Pacearchaeota archaeon CG1_02_32_132	NA
GCA_001872825.1	d__Archaea	p__Nanoarchaeota	c__Nanoarchaeia	o__Woesearchaeales	f__CG1-02-47-18	g__CG1-02-47-18	s__CG1-02-47-18 sp002763335	Candidatus Woesearchaeota archaeon CG1_02_47_18	NA
GCA_001872885.1	d__Archaea	p__Huberarchaeota	c__Huberarchaeia	o__Huberarchaeales	f__Huberarchaeaceae	g__Huberarchaeum	s__Huberarchaeum crystalense	archaeon CG2_30_31_98	NA
GCA_001873845.1	d__Archaea	p__Altiarchaeota	c__Altiarchaeia	o__Altiarchaeales	f__Altiarchaeaceae	g__Altiarchaeum	s__Altiarchaeum hamiconexum	Candidatus Altarchaeum sp. CG2_30_32_3053	NA
GCA_001873985.1	d__Archaea	p__Aenigmatarchaeota	c__Aenigmatarchaeia	o__CG10238-14	f__CG10238-14	g__CG10238-14	s__CG10238-14 sp002789635	Candidatus Aenigmarchaeota archaeon CG1_02_38_14	NA
GCA_001875345.1	d__Archaea	p__Thermoplasmatota	c__Poseidoniia	o__MGIII	f__CG-Epi1	g__CG-Epi1	s__CG-Epi1 sp001875345	Marine Group III euryarchaeote CG-Epi1	NA
GCA_001875355.1	d__Archaea	p__Thermoplasmatota	c__Poseidoniia	o__MGIII	f__CG-Epi1	g__CG-Epi1	s__CG-Epi1 sp002497685	Marine Group III euryarchaeote CG-Epi3	NA
GCA_001875365.1	d__Archaea	p__Thermoplasmatota	c__Poseidoniia	o__MGIII	f__CG-Epi1	g__CG-Epi1	s__CG-Epi1 sp001875365	Marine Group III euryarchaeote CG-Epi4	NA
GCA_001875425.1	d__Archaea	p__Thermoplasmatota	c__Poseidoniia	o__MGIII	f__CG-Epi1	g__UBA102	s__UBA102 sp001875425	Marine Group III euryarchaeote CG-Bathy1	NA
GCA_001886955.1	d__Archaea	p__Halobacteriota	c__Halobacteria	o__Halobacteriales	f__Halobacteriaceae	g__Halodesulfurarchaeum	s__Halodesulfurarchaeum formicicum	Halodesulfurarchaeum formicicum	strain=HSR6
GCA_001888095.1	d__Archaea	p__Halobacteriota	c__Methanosarcinia	o__Methanosarcinales	f__Methanosarcinaceae	g__Methanohalophilus	s__Methanohalophilus portucalensis	Methanohalophilus portucalensis FDF-1	strain=FDF-1
GCA_001889405.1	d__Archaea	p__Halobacteriota	c__Methanosarcinia	o__Methanosarcinales	f__Methanosarcinaceae	g__Methanohalophilus	s__Methanohalophilus halophilus	Methanohalophilus halophilus	strain=Z-7982
GCA_001889985.1	d__Archaea	p__Micrarchaeota	c__Micrarchaeia	o__Micrarchaeales	f__Micrarchaeaceae	g__Micrarchaeum_A	s__Micrarchaeum_A acidiphilum_A	Candidatus Micrarchaeum sp. ARMAN-1	NA
GCA_001896515.1	d__Archaea	p__Micrarchaeota	c__Micrarchaeia	o__Micrarchaeales	f__Micrarchaeaceae	g__Micrarchaeum_A	s__Micrarchaeum_A acidiphilum_A	Candidatus Micrarchaeum sp. AZ1	NA
GCA_001896715.1	d__Archaea	p__Halobacteriota	c__Methanomicrobia	o__Methanomicrobiales	f__Methanoculleaceae	g__Methanoculleus	s__Methanoculleus sp001896715	Methanoculleus sp. EBM-46	NA
GCA_001896725.1	d__Archaea	p__Halobacteriota	c__Methanosarcinia	o__Methanosarcinales	f__Methanosarcinaceae	g__Methanomethylovorans	s__Methanomethylovorans sp001896725	Methanococcoides sp. EBM-47	NA
GCA_001914405.1	d__Archaea	p__Halobacteriota	c__Methanonatronarchaeia	o__Methanonatronarchaeales	f__Methanonatronarchaeaceae	g__Methanohalarchaeum	s__Methanohalarchaeum thermophilum	Candidatus Methanohalarchaeum thermophilum	NA
GCA_001915065.1	d__Archaea	p__Thermoproteota	c__Bathyarchaeia	o__40CM-2-53-6	f__40CM-2-53-6	g__40CM-2-53-6	s__40CM-2-53-6 sp001915065	archaeon 13_2_20CM_2_53_6	NA
GCA_001917505.1	d__Archaea	p__Thermoproteota	c__Nitrososphaeria	o__Nitrososphaerales	f__Nitrosopumilaceae	g__Nitrosotalea	s__Nitrosotalea sp001917995	Thaumarchaeota archaeon 13_1_40CM_38_12	NA
GCA_001917965.1	d__Archaea	p__Thermoproteota	c__Nitrososphaeria	o__Nitrososphaerales	f__Nitrososphaeraceae	g__Nitrososphaera	s__Nitrososphaera sp002501845	Thaumarchaeota archaeon 13_1_40CM_4_48_7	NA
GCA_001917995.1	d__Archaea	p__Thermoproteota	c__Nitrososphaeria	o__Nitrososphaerales	f__Nitrosopumilaceae	g__Nitrosotalea	s__Nitrosotalea sp001917995	Thaumarchaeota archaeon 13_1_40CM_4_38_7	NA
GCA_001918315.1	d__Archaea	p__Thermoproteota	c__Bathyarchaeia	o__40CM-2-53-6	f__40CM-2-53-6	g__40CM-2-53-6	s__40CM-2-53-6 sp001915065	archaeon 13_1_40CM_4_53_4	NA
GCA_001918475.1	d__Archaea	p__Thermoproteota	c__Nitrososphaeria	o__Nitrososphaerales	f__Nitrosopumilaceae	g__Nitrosotalea	s__Nitrosotalea sp001917995	Thaumarchaeota archaeon 13_1_40CM_3_38_6	NA
GCA_001918745.1	d__Archaea	p__Thermoproteota	c__Bathyarchaeia	o__40CM-2-53-6	f__40CM-2-53-6	g__40CM-2-53-6	s__40CM-2-53-6 sp001918745	Crenarchaeota archaeon 13_1_40CM_3_52_17	NA
GCA_001918765.1	d__Archaea	p__Thermoproteota	c__Bathyarchaeia	o__40CM-2-53-6	f__40CM-2-53-6	g__40CM-2-53-6	s__40CM-2-53-6 sp001918765	Crenarchaeota archaeon 13_1_40CM_3_52_10	NA
GCA_001918995.1	d__Archaea	p__Thermoproteota	c__Nitrososphaeria	o__Nitrososphaerales	f__Nitrosopumilaceae	g__Nitrosotalea	s__Nitrosotalea sp001920395	Thaumarchaeota archaeon 13_1_40CM_2_39_13_1	NA
GCA_001919175.1	d__Archaea	p__Thermoproteota	c__Bathyarchaeia	o__40CM-2-53-6	f__40CM-2-53-6	g__40CM-2-53-6	s__40CM-2-53-6 sp001918745	Crenarchaeota archaeon 13_1_40CM_2_52_14	NA
GCA_001919285.1	d__Archaea	p__Thermoproteota	c__Bathyarchaeia	o__40CM-2-53-6	f__40CM-2-53-6	g__40CM-2-53-6	s__40CM-2-53-6 sp001919285	archaeon 13_1_40CM_2_52_13	NA
GCA_001920395.1	d__Archaea	p__Thermoproteota	c__Nitrososphaeria	o__Nitrososphaerales	f__Nitrosopumilaceae	g__Nitrosotalea	s__Nitrosotalea sp001920395	Thaumarchaeota archaeon 13_1_20CM_2_39_20	NA
GCA_001920575.1	d__Archaea	p__Thermoproteota	c__Bathyarchaeia	o__40CM-2-53-6	f__40CM-2-53-6	g__40CM-2-53-6	s__40CM-2-53-6 sp001915065	Crenarchaeota archaeon 13_1_20CM_2_53_14	NA
GCA_001940645.1	d__Archaea	p__Asgardarchaeota	c__Heimdallarchaeia	o__Hodarchaeales	f__LC-3	g__LC-3	s__LC-3 sp001940645	Candidatus Heimdallarchaeota archaeon LC_3	NA
GCA_001940655.1	d__Archaea	p__Asgardarchaeota	c__Lokiarchaeia	o__CR-4	f__CR-4	g__CR-4	s__CR-4 sp001940655	Candidatus Lokiarchaeota archaeon CR_4	NA
GCA_001940705.1	d__Archaea	p__Asgardarchaeota	c__Thorarchaeia	o__Thorarchaeales	f__Thorarchaeaceae	g__SMTZ1-45	s__SMTZ1-45 sp001940705	Candidatus Thorarchaeota archaeon AB_25	NA
GCA_001940725.1	d__Archaea	p__Asgardarchaeota	c__Heimdallarchaeia	o__UBA460	f__Kariarchaeaceae	g__LC-2	s__LC-2 sp001940725	Candidatus Heimdallarchaeota archaeon LC_2	NA
GCA_001940755.1	d__Archaea	p__Asgardarchaeota	c__Heimdallarchaeia	o__UBA460	f__UBA460	g__UBA460	s__UBA460 sp001940755	Candidatus Heimdallarchaeota archaeon AB_125	NA
GCA_001940805.1	d__Archaea	p__Halobacteriota	c__Methanomicrobia	o__Methanomicrobiales	f__Methanocorpusculaceae	g__Methanocorpusculum	s__Methanocorpusculum sp001940805	Methanocorpusculaceae archaeon Phil4	NA
GCA_001950595.1	d__Archaea	p__Halobacteriota	c__Halobacteria	o__Halobacteriales	f__Haloarculaceae	g__Halosegnis	s__Halosegnis longus	Salella cibi	strain=CBA1134
GCA_001953745.1	d__Archaea	p__Halobacteriota	c__Halobacteria	o__Halobacteriales	f__Natrialbaceae	g__Natrinema	s__Natrinema saccharevitans	Natrinema saccharevitans	strain=AB14
GCA_001971705.1	d__Archaea	p__Halobacteriota	c__Halobacteria	o__Halobacteriales	f__Natrialbaceae	g__Natronorubrum	s__Natronorubrum daqingense	Natronorubrum daqingense	strain=JX313
GCA_001989615.1	d__Archaea	p__Halobacteriota	c__Halobacteria	o__Halobacteriales	f__Haloarculaceae	g__Halorientalis	s__Halorientalis sp001989615	Halorientalis sp. IM1011	strain=IM1011
GCA_002009965.1	d__Archaea	p__Methanobacteriota	c__Methanococci	o__Methanococcales	f__Methanococcaceae	g__Methanothermococcus	s__Methanothermococcus thermolithotrophicus	Methanothermococcus sp. JdFR-03	NA
GCA_002009975.1	d__Archaea	p__Methanobacteriota_B	c__Thermococci	o__Thermococcales	f__Thermococcaceae	g__Thermococcus_C	s__Thermococcus_C sp002009975	Thermococcus sp. JdFR-02	NA
GCA_002010045.1	d__Archaea	p__Halobacteriota	c__Archaeoglobi	o__Archaeoglobales	f__Archaeoglobaceae	g__JdFR-22	s__JdFR-22 sp002010045	Archaeoglobus sp. JdFR-22	NA
GCA_002010075.1	d__Archaea	p__Halobacteriota	c__Methanosarcinia_A	o__Methanosarcinales_A	f__Methermicoccaceae	g__JdFR-19	s__JdFR-19 sp002010075	Methanomicrobia archaeon JdFR-19	NA
GCA_002010155.1	d__Archaea	p__Halobacteriota	c__Archaeoglobi	o__Archaeoglobales	f__Archaeoglobaceae	g__Archaeoglobus_A	s__Archaeoglobus_A sp002010195	Archaeoglobus sp. JdFR-31	NA
GCA_002010195.1	d__Archaea	p__Halobacteriota	c__Archaeoglobi	o__Archaeoglobales	f__Archaeoglobaceae	g__Archaeoglobus_A	s__Archaeoglobus_A sp002010195	Archaeoglobus sp. JdFR-32	NA
GCA_002010215.1	d__Archaea	p__Halobacteriota	c__Archaeoglobi	o__Archaeoglobales	f__Archaeoglobaceae	g__JdFR-37	s__JdFR-37 sp002010215	Archaeoglobus sp. JdFR-37	NA
GCA_002010285.1	d__Archaea	p__Halobacteriota	c__Archaeoglobi	o__Archaeoglobales	f__Archaeoglobaceae	g__JdFR-41	s__JdFR-41 sp002010285	Archaeoglobus sp. JdFR-41	NA
GCA_002010295.1	d__Archaea	p__Halobacteriota	c__Archaeoglobi	o__Archaeoglobales	f__Archaeoglobaceae	g__Archaeoglobus	s__Archaeoglobus sp002507545	Archaeoglobus sp. JdFR-39	NA
GCA_002010305.1	d__Archaea	p__Halobacteriota	c__Archaeoglobi	o__Archaeoglobales	f__JdFR-42	g__JdFR-42	s__JdFR-42 sp002010305	Archaeoglobi archaeon JdFR-42	NA
GCA_002010925.1	d__Archaea	p__Thermoproteota	c__Bathyarchaeia	o__B26-1	f__UBA233	g__UBA233	s__UBA233 sp002010925	Candidatus Bathyarchaeota archaeon JdFR-04	NA
GCA_002010975.1	d__Archaea	p__Thermoproteota	c__Bathyarchaeia	o__B26-1	f__UBA233	g__JdFR-07	s__JdFR-07 sp002010975	Candidatus Bathyarchaeota archaeon JdFR-07	NA
GCA_002011215.1	d__Archaea	p__Halobacteriota	c__Archaeoglobi	o__Archaeoglobales	f__Archaeoglobaceae	g__Archaeoglobus_A	s__Archaeoglobus_A sp002011215	Archaeoglobus sp. JdFR-24	NA
GCA_002011235.1	d__Archaea	p__Halobacteriota	c__Archaeoglobi	o__Archaeoglobales	f__Archaeoglobaceae	g__Archaeoglobus_A	s__Archaeoglobus_A sp002011235	Archaeoglobus sp. JdFR-27	NA
GCA_002011295.1	d__Archaea	p__Halobacteriota	c__Archaeoglobi	o__Archaeoglobales	f__Archaeoglobaceae	g__Archaeoglobus_A	s__Archaeoglobus_A sp002494625	Archaeoglobus sp. JdFR-34	NA
GCA_002011315.1	d__Archaea	p__Halobacteriota	c__Archaeoglobi	o__Archaeoglobales	f__Archaeoglobaceae	g__Archaeoglobus_A	s__Archaeoglobus_A sp002494625	Archaeoglobus sp. JdFR-35	NA
GCA_002011355.1	d__Archaea	p__Thermoplasmatota	c__E2	o__UBA202	f__JdFR-43	g__JdFR-43	s__JdFR-43 sp002011355	Thermoplasmatales archaeon JdFR-43	NA
GCA_002011395.1	d__Archaea	p__Thermoplasmatota	c__Thermoplasmata	o__Aciduliprofundales	f__JdFR-45	g__JdFR-45	s__JdFR-45 sp002011395	Aciduliprofundum sp. JdFR-45	NA
GCA_002025255.2	d__Archaea	p__Halobacteriota	c__Halobacteria	o__Halobacteriales	f__Haloferacaceae	g__Halolamina	s__Halolamina sp002025255	Halolamina sp. CBA1230	strain=CBA1230
GCA_002067035.1	d__Archaea	p__Halobacteriota	c__Methanomicrobia	o__Methanomicrobiales	f__Methanoregulaceae	g__Methanoregula	s__Methanoregula sp002067035	Methanoregula sp. PtaB.Bin085	NA
GCA_002067045.1	d__Archaea	p__Thermoplasmatota	c__Thermoplasmata	o__Methanomassiliicoccales	f__UBA472	g__UBA472	s__UBA472 sp002067045	Methanomassiliicoccales archaeon PtaB.Bin134	NA
GCA_002067065.1	d__Archaea	p__Methanobacteriota	c__Methanobacteria	o__Methanobacteriales	f__Methanobacteriaceae	g__Methanobacterium	s__Methanobacterium sp002067065	Methanobacterium sp. PtaB.Bin024	NA
GCA_002067095.1	d__Archaea	p__Halobacteriota	c__Methanomicrobia	o__Methanomicrobiales	f__Methanoregulaceae	g__Methanolinea_A	s__Methanolinea_A sp002067095	Methanoregulaceae archaeon PtaB.Bin056	NA
GCA_002067115.1	d__Archaea	p__Halobacteriota	c__Methanomicrobia	o__Methanomicrobiales	f__Methanoregulaceae	g__Methanolinea_A	s__Methanolinea_A sp11423u	Methanoregulaceae archaeon PtaB.Bin009	NA
GCA_002067155.1	d__Archaea	p__Halobacteriota	c__Methanomicrobia	o__Methanomicrobiales	f__Methanoregulaceae	g__Methanolinea_A	s__Methanolinea_A sp002067155	Methanoregulaceae archaeon PtaB.Bin152	NA
GCA_002067265.1	d__Archaea	p__Halobacteriota	c__Methanosarcinia	o__Methanosarcinales	f__Methanosarcinaceae	g__Methanomethylovorans	s__Methanomethylovorans sp002067265	Methanomethylovorans sp. PtaU1.Bin073	NA
GCA_002067275.1	d__Archaea	p__Halobacteriota	c__Methanosarcinia	o__Methanosarcinales	f__Methanosarcinaceae	g__Methanomethylovorans	s__Methanomethylovorans sp002067275	Methanomethylovorans sp. PtaU1.Bin093	NA
GCA_002067315.1	d__Archaea	p__Halobacteriota	c__Methanocellia	o__Methanocellales	f__Methanocellaceae	g__Methanocella_A	s__Methanocella_A sp002067315	Methanocella sp. PtaU1.Bin125	NA
GCA_002067325.1	d__Archaea	p__Methanobacteriota	c__Methanobacteria	o__Methanobacteriales	f__Methanobacteriaceae	g__Methanobacterium_A	s__Methanobacterium_A sp002067325	Methanobacterium sp. PtaU1.Bin097	NA
GCA_002067365.1	d__Archaea	p__Halobacteriota	c__Methanosarcinia	o__Methanotrichales	f__Methanotrichaceae	g__Methanothrix	s__Methanothrix sp002067365	Methanosaeta sp. PtaU1.Bin060	NA
GCA_002067485.1	d__Archaea	p__Halobacteriota	c__Methanomicrobia	o__Methanomicrobiales	f__Methanoregulaceae	g__Methanolinea_A	s__Methanolinea_A sp018262855	Methanoregulaceae archaeon PtaB.Bin108	NA
GCA_002067495.1	d__Archaea	p__Halobacteriota	c__Methanosarcinia	o__Methanotrichales	f__Methanotrichaceae	g__Methanothrix_A	s__Methanothrix_A sp001602645	Methanosaeta sp. PtaB.Bin087	NA
GCA_002067565.1	d__Archaea	p__Methanobacteriota	c__Methanobacteria	o__Methanobacteriales	f__Methanobacteriaceae	g__Methanobacterium_A	s__Methanobacterium_A sp002067565	Methanobacterium sp. PtaU1.Bin242	NA
GCA_002067635.1	d__Archaea	p__Thermoplasmatota	c__Thermoplasmata	o__Methanomassiliicoccales	f__Methanomassiliicoccaceae	g__UBA6	s__UBA6 sp002067635	Methanomassiliicoccales archaeon PtaU1.Bin030	NA
GCA_002067645.1	d__Archaea	p__Halobacteriota	c__Methanomicrobia	o__Methanomicrobiales	f__Methanoregulaceae	g__Methanoregula	s__Methanoregula sp002067035	Methanoregula sp. PtaU1.Bin006	NA
GCA_002067665.1	d__Archaea	p__Halobacteriota	c__Methanomicrobia	o__Methanomicrobiales	f__Methanoregulaceae	g__Methanolinea_A	s__Methanolinea_A sp11423u	Methanoregulaceae archaeon PtaU1.Bin066	NA
GCA_002067685.1	d__Archaea	p__Halobacteriota	c__Methanomicrobia	o__Methanomicrobiales	f__Methanoregulaceae	g__Methanolinea_A	s__Methanolinea_A sp018262855	Methanoregulaceae archaeon PtaU1.Bin222	NA
GCA_002067705.1	d__Archaea	p__Halobacteriota	c__Methanosarcinia	o__Methanotrichales	f__Methanotrichaceae	g__Methanothrix	s__Methanothrix sp002067705	Methanosaeta sp. PtaU1.Bin112	NA
GCA_002067755.1	d__Archaea	p__Halobacteriota	c__Methanosarcinia	o__Methanotrichales	f__Methanotrichaceae	g__Methanothrix	s__Methanothrix sp002067755	Methanosaeta sp. PtaB.Bin018	NA
GCA_002067795.1	d__Archaea	p__Halobacteriota	c__Methanosarcinia	o__Methanotrichales	f__Methanotrichaceae	g__MVQI01	s__MVQI01 sp002067795	Methanosaeta sp. PtaB.Bin039	NA
GCA_002067865.1	d__Archaea	p__Thermoplasmatota	c__Thermoplasmata	o__Methanomassiliicoccales	f__UBA472	g__MVRC01	s__MVRC01 sp002067865	Methanomassiliicoccales archaeon PtaU1.Bin124	NA
GCA_002067895.1	d__Archaea	p__Halobacteriota	c__Methanomicrobia	o__Methanomicrobiales	f__Methanoregulaceae	g__MVRE01	s__MVRE01 sp002067895	Methanoregula sp. PtaU1.Bin051	NA
GCA_002067905.1	d__Archaea	p__Halobacteriota	c__Methanosarcinia	o__Methanotrichales	f__Methanotrichaceae	g__Methanothrix	s__Methanothrix sp002067755	Methanosaeta sp. PtaU1.Bin016	NA
GCA_002067935.1	d__Archaea	p__Halobacteriota	c__Methanosarcinia	o__Methanotrichales	f__Methanotrichaceae	g__MVQI01	s__MVQI01 sp002067795	Methanosaeta sp. PtaU1.Bin028	NA
GCA_002067955.1	d__Archaea	p__Halobacteriota	c__Methanosarcinia	o__Methanotrichales	f__Methanotrichaceae	g__Methanothrix_A	s__Methanothrix_A sp001602645	Methanosaeta sp. PtaU1.Bin055	NA
GCA_002068435.1	d__Archaea	p__Halobacteriota	c__Methanomicrobia	o__Methanomicrobiales	f__Methanoregulaceae	g__UBA9949	s__UBA9949 sp002068435	Euryarchaeota archaeon ADurb.BinA087	NA
GCA_002068885.1	d__Archaea	p__Iainarchaeota	c__Iainarchaeia	o__Iainarchaeales	f__JAAZKV01	g__JAAZKV01	s__JAAZKV01 sp002068885	archaeon ADurb.Bin336	NA
GCA_002069575.1	d__Archaea	p__Halobacteriota	c__Methanomicrobia	o__Methanomicrobiales	f__Methanospirillaceae	g__Methanospirillum	s__Methanospirillum hungatei	Euryarchaeota archaeon ADurb.Bin294	NA
GCA_002069705.1	d__Archaea	p__Nanoarchaeota	c__Nanoarchaeia	o__Pacearchaeales	f__GW2011-AR1	g__MWBV01	s__MWBV01 sp002069705	Candidatus Diapherotrites archaeon ADurb.Bin253	NA
GCA_002071305.1	d__Archaea	p__Methanobacteriota_B	c__Thermococci	o__Methanofastidiosales	f__Methanofastidiosaceae	g__Methanofastidiosum	s__Methanofastidiosum sp001587595	Euryarchaeota archaeon ADurb.Bin023	NA
GCA_002072215.1	d__Archaea	p__Methanobacteriota	c__Methanobacteria	o__Methanobacteriales	f__Methanobacteriaceae	g__Methanobrevibacter_C	s__Methanobrevibacter_C arboriphilus	Methanobrevibacter arboriphilus JCM 13429 = DSM 1125	strain=DH1
GCA_002077075.2	d__Archaea	p__Thermoproteota	c__Thermoprotei	o__Thermoproteales	f__Thermoproteaceae	g__Thermoproteus	s__Thermoproteus sp002077075	Thermoproteus sp. CP80	strain=CP80
GCA_002078355.1	d__Archaea	p__Thermoplasmatota	c__Thermoplasmata	o__Thermoplasmatales	f__Thermoplasmataceae	g__Ferroplasma	s__Ferroplasma acidiphilum	Ferroplasma acidiphilum	strain=Y
GCA_002083985.1	d__Archaea	p__Altiarchaeota	c__Altiarchaeia	o__Altiarchaeales	f__Altiarchaeaceae	g__Altiarchaeum	s__Altiarchaeum sp002083985	Candidatus Altiarchaeales archaeon A3	NA
GCA_002114285.1	d__Archaea	p__Halobacteriota	c__Halobacteria	o__Halobacteriales	f__Haloferacaceae	g__Halorubrum	s__Halorubrum ezzemoulense	Halorubrum ezzemoulense DSM 17463	strain=DSM 17463
GCA_002116695.1	d__Archaea	p__Thermoproteota	c__Thermoprotei_A	o__Sulfolobales	f__Sulfolobaceae	g__Acidianus	s__Acidianus manzaensis	Acidianus manzaensis	strain=YN-25
GCA_002135045.1	d__Archaea	p__Halobacteriota	c__Halobacteria	o__Halobacteriales	f__Haloferacaceae	g__Halorubrum	s__Halorubrum ezzemoulense	Halorubrum sp. SD683	strain=SD683
GCA_002153915.1	d__Archaea	p__Halobacteriota	c__Methanonatronarchaeia	o__Methanonatronarchaeales	f__Methanonatronarchaeaceae	g__Methanonatronarchaeum	s__Methanonatronarchaeum thermophilum	Methanonatronarchaeum thermophilum	strain=AMET1
GCA_002156705.1	d__Archaea	p__Halobacteriota	c__Halobacteria	o__Halobacteriales	f__Natrialbaceae	g__Natrarchaeobaculum	s__Natrarchaeobaculum aegyptiacum	Natrarchaeobaculum aegyptiacum	strain=JW/NM-HA 15
GCA_002156965.1	d__Archaea	p__Thermoproteota	c__Nitrososphaeria	o__Nitrososphaerales	f__Nitrosopumilaceae	g__Nitrosopumilus	s__Nitrosopumilus catalinensis	Candidatus Nitrosomarinus catalina	strain=SPOT01
GCA_002168805.2	d__Archaea	p__Thermoplasmatota	c__Poseidoniia	o__Poseidoniales	f__Poseidoniaceae	g__MGIIa-L1	s__MGIIa-L1 sp002702945	Euryarchaeota archaeon TMED248	NA
GCA_002169555.1	d__Archaea	p__Thermoplasmatota	c__Poseidoniia	o__Poseidoniales	f__Thalassarchaeaceae	g__MGIIb-O5	s__MGIIb-O5 sp002506825	Euryarchaeota archaeon TMED215	NA
GCA_002170075.2	d__Archaea	p__Thermoplasmatota	c__Poseidoniia	o__Poseidoniales	f__Poseidoniaceae	g__MGIIa-L3	s__MGIIa-L3 sp11892u	Euryarchaeota archaeon TMED141	NA
GCA_002170315.2	d__Archaea	p__Thermoplasmatota	c__Poseidoniia	o__Poseidoniales	f__Poseidoniaceae	g__MGIIa-L1	s__MGIIa-L1 sp002170315	Euryarchaeota archaeon TMED99	NA
GCA_002170365.2	d__Archaea	p__Thermoplasmatota	c__Poseidoniia	o__Poseidoniales	f__Thalassarchaeaceae	g__MGIIb-N2	s__MGIIb-N2 sp002502625	Euryarchaeota archaeon TMED85	NA
GCA_002170775.2	d__Archaea	p__Thermoplasmatota	c__Poseidoniia	o__Poseidoniales	f__Thalassarchaeaceae	g__MGIIb-N1	s__MGIIb-N1 sp002170775	Euryarchaeota archaeon TMED192	NA
GCA_002171315.2	d__Archaea	p__Thermoplasmatota	c__Poseidoniia	o__Poseidoniales	f__Poseidoniaceae	g__MGIIa-L2	s__MGIIa-L2 sp002171315	Euryarchaeota archaeon TMED117	NA
GCA_002171445.1	d__Archaea	p__Thermoplasmatota	c__Poseidoniia	o__Poseidoniales	f__Thalassarchaeaceae	g__MGIIb-O3	s__MGIIb-O3 sp002457145	Euryarchaeota archaeon TMED97	NA
GCA_002172185.1	d__Archaea	p__Thermoplasmatota	c__Poseidoniia	o__Poseidoniales	f__Thalassarchaeaceae	g__MGIIb-O3	s__MGIIb-O3 sp002172185	Euryarchaeota archaeon TMED173	NA
GCA_002172355.2	d__Archaea	p__Thermoplasmatota	c__Poseidoniia	o__Poseidoniales	f__Poseidoniaceae	g__MGIIa-L1	s__MGIIa-L1 sp002172355	Euryarchaeota archaeon TMED132	NA
GCA_002172375.1	d__Archaea	p__Thermoplasmatota	c__Poseidoniia	o__Poseidoniales	f__Thalassarchaeaceae	g__MGIIb-O3	s__MGIIb-O3 sp002172375	Euryarchaeota archaeon TMED129	NA
GCA_002177135.1	d__Archaea	p__Halobacteriota	c__Halobacteria	o__Halobacteriales	f__Natrialbaceae	g__Natronolimnobius	s__Natronolimnobius baerhuensis	Natronolimnobius baerhuensis	strain=CGMCC 1.3597
GCA_002194565.1	d__Archaea	p__Thermoproteota	c__Thermoprotei_A	o__Sulfolobales	f__Pyrodictiaceae	g__Pyrodictium	s__Pyrodictium delaneyi	Pyrodictium delaneyi	strain=Hulk
GCA_002197185.1	d__Archaea	p__Methanobacteriota_B	c__Thermococci	o__Thermococcales	f__Thermococcaceae	g__Thermococcus	s__Thermococcus radiotolerans	Thermococcus sp. 5-4	strain=5-4
GCA_002201895.1	d__Archaea	p__Methanobacteriota	c__Methanopyri	o__Methanopyrales	f__Methanopyraceae	g__Methanopyrus	s__Methanopyrus sp002201895	Methanopyrus sp. SNP6	strain=SNP6
GCA_002201915.1	d__Archaea	p__Methanobacteriota	c__Methanopyri	o__Methanopyrales	f__Methanopyraceae	g__Methanopyrus	s__Methanopyrus sp002201895	Methanopyrus sp. KOL6	strain=KOL6
GCA_002204655.1	d__Archaea	p__Thermoplasmatota	c__Thermoplasmata	o__Thermoplasmatales	f__Thermoplasmataceae	g__Cuniculiplasma	s__Cuniculiplasma divulgatum	Cuniculiplasma sp. C_DKE	NA
GCA_002204695.1	d__Archaea	p__Micrarchaeota	c__Micrarchaeia	o__Micrarchaeales	f__Micrarchaeaceae	g__Micrarchaeum_A	s__Micrarchaeum_A acidiphilum_A	Thermoplasmatales archaeon ARMAN	NA
GCA_002204705.1	d__Archaea	p__Thermoplasmatota	c__Thermoplasmata	o__Thermoplasmatales	f__Thermoplasmataceae	g__B-DKE	s__B-DKE sp002204705	Thermoplasmatales archaeon B_DKE	NA
GCA_002208625.1	d__Archaea	p__Methanobacteriota	c__Methanobacteria	o__Methanobacteriales	f__Methanobacteriaceae	g__Methanobrevibacter_B	s__Methanobrevibacter_B sp002208625	Methanobrevibacter sp. 87.7	strain=87.7
GCA_002214165.1	d__Archaea	p__Micrarchaeota	c__Micrarchaeia	o__Micrarchaeales	f__Micrarchaeaceae	g__Mancarchaeum	s__Mancarchaeum acidiphilum	Candidatus Mancarchaeum acidiphilum	strain=Mia14
GCA_002214365.1	d__Archaea	p__Methanobacteriota_B	c__Thermococci	o__Thermococcales	f__Thermococcaceae	g__Thermococcus	s__Thermococcus celer	Thermococcus celer Vu 13 = JCM 8558	strain=Vu 13
GCA_002214385.1	d__Archaea	p__Methanobacteriota_B	c__Thermococci	o__Thermococcales	f__Thermococcaceae	g__Thermococcus	s__Thermococcus gorgonarius	Thermococcus gorgonarius	strain=W-12
GCA_002214465.1	d__Archaea	p__Methanobacteriota_B	c__Thermococci	o__Thermococcales	f__Thermococcaceae	g__Thermococcus	s__Thermococcus barossii	Thermococcus barossii	strain=SHCK-94
GCA_002214485.1	d__Archaea	p__Methanobacteriota_B	c__Thermococci	o__Thermococcales	f__Thermococcaceae	g__Thermococcus	s__Thermococcus pacificus	Thermococcus pacificus	strain=P-4
GCA_002214505.1	d__Archaea	p__Methanobacteriota_B	c__Thermococci	o__Thermococcales	f__Thermococcaceae	g__Thermococcus	s__Thermococcus siculi	Thermococcus siculi	strain=RG-20
GCA_002214525.1	d__Archaea	p__Methanobacteriota_B	c__Thermococci	o__Thermococcales	f__Thermococcaceae	g__Thermococcus	s__Thermococcus sp002214525	Thermococcus sp. P6	strain=P6
GCA_002214545.1	d__Archaea	p__Methanobacteriota_B	c__Thermococci	o__Thermococcales	f__Thermococcaceae	g__Thermococcus	s__Thermococcus thioreducens	Thermococcus thioreducens	strain=OGL-20P
GCA_002214565.1	d__Archaea	p__Methanobacteriota_B	c__Thermococci	o__Thermococcales	f__Thermococcaceae	g__Thermococcus	s__Thermococcus radiotolerans	Thermococcus radiotolerans	strain=EJ2
GCA_002214585.1	d__Archaea	p__Methanobacteriota_B	c__Thermococci	o__Thermococcales	f__Thermococcaceae	g__Thermococcus	s__Thermococcus profundus	Thermococcus profundus	strain=DT 5432
GCA_002214605.1	d__Archaea	p__Methanobacteriota_B	c__Thermococci	o__Thermococcales	f__Thermococcaceae	g__Pyrococcus	s__Pyrococcus chitonophagus	Thermococcus chitonophagus	strain=GC74
GCA_002215285.1	d__Archaea	p__Halobacteriota	c__Halobacteria	o__Halobacteriales	f__Haloferacaceae	g__Halorubrum	s__Halorubrum lacusprofundi	Halorubrum lacusprofundi	strain=HLS1
GCA_002215305.1	d__Archaea	p__Halobacteriota	c__Halobacteria	o__Halobacteriales	f__Haloferacaceae	g__Halorubrum	s__Halorubrum lacusprofundi	Halorubrum lacusprofundi	strain=DL18
GCA_002215405.1	d__Archaea	p__Thermoproteota	c__Thermoprotei_A	o__Sulfolobales	f__Sulfolobaceae	g__Sulfolobus	s__Sulfolobus acidocaldarius	Sulfolobus acidocaldarius	strain=Y14 18-5
GCA_002215445.1	d__Archaea	p__Thermoproteota	c__Thermoprotei_A	o__Sulfolobales	f__Sulfolobaceae	g__Sulfolobus	s__Sulfolobus acidocaldarius	Sulfolobus acidocaldarius	strain=Y14 20-20
GCA_002215485.1	d__Archaea	p__Thermoproteota	c__Thermoprotei_A	o__Sulfolobales	f__Sulfolobaceae	g__Sulfolobus	s__Sulfolobus acidocaldarius	Sulfolobus acidocaldarius	strain=Y14 16-22
GCA_002215525.1	d__Archaea	p__Thermoproteota	c__Thermoprotei_A	o__Sulfolobales	f__Sulfolobaceae	g__Sulfolobus	s__Sulfolobus acidocaldarius	Sulfolobus acidocaldarius	strain=Y14 13-1
GCA_002215565.1	d__Archaea	p__Thermoproteota	c__Thermoprotei_A	o__Sulfolobales	f__Sulfolobaceae	g__Sulfolobus	s__Sulfolobus acidocaldarius	Sulfolobus acidocaldarius	strain=DG1
GCA_002243045.1	d__Archaea	p__Halobacteriota	c__Methanosarcinia	o__Methanosarcinales	f__Methanosarcinaceae	g__Methanolobus	s__Methanolobus psychrotolerans	Methanolobus psychrotolerans	strain=YSF-03
GCA_002252585.1	d__Archaea	p__Methanobacteriota	c__Methanobacteria	o__Methanobacteriales	f__Methanobacteriaceae	g__Methanobrevibacter_A	s__Methanobrevibacter_A smithii_A	Methanobrevibacter smithii	strain=WWM1085
GCA_002252725.1	d__Archaea	p__Halobacteriota	c__Halobacteria	o__Halobacteriales	f__Haloferacaceae	g__Halorubrum	s__Halorubrum ezzemoulense	Halorubrum ezzemoulense	strain=LD3
GCA_002252745.1	d__Archaea	p__Halobacteriota	c__Halobacteria	o__Halobacteriales	f__Haloferacaceae	g__Halorubrum	s__Halorubrum sp002252755	Halorubrum sp. Ib24	strain=Ib24
GCA_002252755.1	d__Archaea	p__Halobacteriota	c__Halobacteria	o__Halobacteriales	f__Haloferacaceae	g__Halorubrum	s__Halorubrum sp002252755	Halorubrum sp. Hd13	strain=Hd13
GCA_002252805.1	d__Archaea	p__Halobacteriota	c__Halobacteria	o__Halobacteriales	f__Haloferacaceae	g__Halorubrum	s__Halorubrum ezzemoulense	Halorubrum ezzemoulense	strain=Ga36
GCA_002252815.1	d__Archaea	p__Halobacteriota	c__Halobacteria	o__Halobacteriales	f__Haloferacaceae	g__Halorubrum	s__Halorubrum ezzemoulense	Halorubrum ezzemoulense	strain=Ga2p
GCA_002252835.1	d__Archaea	p__Halobacteriota	c__Halobacteria	o__Halobacteriales	f__Haloferacaceae	g__Halorubrum	s__Halorubrum ezzemoulense	Halorubrum ezzemoulense	strain=G37
GCA_002252865.1	d__Archaea	p__Halobacteriota	c__Halobacteria	o__Halobacteriales	f__Haloferacaceae	g__Halorubrum	s__Halorubrum ezzemoulense	Halorubrum ezzemoulense	strain=Fb21
GCA_002252875.1	d__Archaea	p__Halobacteriota	c__Halobacteria	o__Halobacteriales	f__Haloferacaceae	g__Halorubrum	s__Halorubrum ezzemoulense	Halorubrum ezzemoulense	strain=Ec15
GCA_002252895.1	d__Archaea	p__Halobacteriota	c__Halobacteria	o__Halobacteriales	f__Haloferacaceae	g__Halorubrum	s__Halorubrum sp002252755	Halorubrum sp. Eb13	strain=Eb13
GCA_002252925.1	d__Archaea	p__Halobacteriota	c__Halobacteria	o__Halobacteriales	f__Haloferacaceae	g__Halorubrum	s__Halorubrum sp002252755	Halorubrum sp. Ea8	strain=Ea8
GCA_002252965.1	d__Archaea	p__Halobacteriota	c__Halobacteria	o__Halobacteriales	f__Haloferacaceae	g__Halorubrum	s__Halorubrum sp002252755	Halorubrum sp. Ea1	strain=Ea1
GCA_002252985.1	d__Archaea	p__Halobacteriota	c__Halobacteria	o__Halobacteriales	f__Haloferacaceae	g__Halorubrum	s__Halorubrum halodurans	Halorubrum halodurans	strain=Cb34
GCA_002254385.1	d__Archaea	p__Thermoplasmatota	c__EX4484-6	o__EX4484-6	f__EX4484-6	g__EX4484-6	s__EX4484-6 sp002254385	Thermoplasmatales archaeon ex4484_6	NA
GCA_002254395.1	d__Archaea	p__Nanoarchaeota	c__Nanoarchaeia	o__Pacearchaeales	f__GW2011-AR1	g__EX4484-71	s__EX4484-71 sp002254395	Candidatus Pacearchaeota archaeon ex4484_71	NA
GCA_002254405.1	d__Archaea	p__Altiarchaeota	c__Altiarchaeia	o__IMC4	f__QMZM01	g__EX4484-2	s__EX4484-2 sp002254405	Candidatus Altiarchaeales archaeon ex4484_96	NA
GCA_002254415.1	d__Archaea	p__EX4484-52	c__EX4484-52	o__EX4484-52	f__EX4484-52	g__EX4484-52	s__EX4484-52 sp002254415	Candidatus Aenigmarchaeota archaeon ex4484_52	NA
GCA_002254475.1	d__Archaea	p__Thermoproteota	c__Bathyarchaeia	o__B26-1	f__B26-1	g__B26-1	s__B26-1 sp001593925	Candidatus Bathyarchaeota archaeon ex4484_40	NA
GCA_002254545.1	d__Archaea	p__Aenigmatarchaeota	c__Aenigmatarchaeia	o__CG10238-14	f__EX4484-224	g__EX4484-224	s__EX4484-224 sp002254545	Candidatus Aenigmarchaeota archaeon ex4484_224	NA
GCA_002254565.1	d__Archaea	p__Altiarchaeota	c__Altiarchaeia	o__IMC4	f__QMZM01	g__EX4484-2	s__EX4484-2 sp002254565	Candidatus Altiarchaeales archaeon ex4484_2	NA
GCA_002254595.1	d__Archaea	p__Thermoproteota	c__Thermoprotei	o__Thermofilales	f__EX4484-15	g__EX4484-15	s__EX4484-15 sp002254595	Thermofilum sp. ex4484_15	NA
GCA_002254665.1	d__Archaea	p__Thermoproteota	c__Thermoprotei_A	o__Sulfolobales	f__Desulfurococcaceae	g__EX4484-58	s__EX4484-58 sp002254665	Desulfurococcales archaeon ex4484_58	NA
GCA_002254745.1	d__Archaea	p__Thermoproteota	c__Thermoprotei_A	o__EX4484-217-1	f__EX4484-217-1	g__EX4484-217-1	s__EX4484-217-1 sp002254745	Desulfurococcales archaeon ex4484_217_1	NA
GCA_002254765.1	d__Archaea	p__Thermoplasmatota	c__EX4484-6	o__EX4484-6	f__EX4484-36	g__EX4484-36	s__EX4484-36 sp002254765	Thermoplasmatales archaeon ex4484_36	NA
GCA_002254785.1	d__Archaea	p__Halobacteriota	c__Syntropharchaeia	o__ANME-1	f__ANME-1	g__ANME1a	s__ANME1a sp003194425	ANME-1 cluster archaeon ex4572_4	NA
GCA_002254805.1	d__Archaea	p__Nanoarchaeota	c__Nanoarchaeia	o__Pacearchaeales	f__UBA284	g__EX4484-31	s__EX4484-31 sp002254805	Candidatus Pacearchaeota archaeon ex4484_31	NA
GCA_002254825.2	d__Archaea	p__Halobacteriota	c__Methanosarcinia	o__Methanosarcinales	f__EX4572-44	g__EX4572-44	s__EX4572-44 sp002254825	Methanosarcinales archaeon ex4572_44	NA
GCA_002254885.1	d__Archaea	p__Thermoplasmatota	c__E2	o__DHVEG-1	f__DHVEG-1	g__EX4572-165	s__EX4572-165 sp002254885	Thermoplasmatales archaeon ex4572_165	NA
GCA_002254895.1	d__Archaea	p__Thermoproteota	c__Thermoprotei	o__Thermoproteales	f__Thermocladiaceae	g__EX4572-64	s__EX4572-64 sp002254895	Thermoprotei archaeon ex4572_64	NA
GCA_002254975.1	d__Archaea	p__Thermoproteota	c__Bathyarchaeia	o__B25	f__B25	g__EX4484-218	s__EX4484-218 sp002254975	Candidatus Bathyarchaeota archaeon ex4484_218	NA
GCA_002255025.1	d__Archaea	p__Thermoproteota	c__Bathyarchaeia	o__EX4484-135	f__EX4484-135	g__EX4484-135	s__EX4484-135 sp002255025	Candidatus Bathyarchaeota archaeon ex4484_135	NA
GCA_002255045.1	d__Archaea	p__Thermoproteota	c__EX4484-205	o__EX4484-205	f__EX4484-205	g__EX4484-205	s__EX4484-205 sp002255045	Candidatus Bathyarchaeota archaeon ex4484_205	NA
GCA_002255065.1	d__Archaea	p__Thermoproteota	c__Thermoprotei_A	o__Sulfolobales	f__NBVN01	g__EX4484-204	s__EX4484-204 sp002255065	Desulfurococcales archaeon ex4484_204	NA
GCA_002255105.1	d__Archaea	p__Thermoproteota	c__Nitrososphaeria_A	o__Caldarchaeales	f__Wolframiiraptoraceae	g__Wolframiiraptor	s__Wolframiiraptor sp002255105	Candidatus Wolframiiraptor sp. EX4484-121	strain=EX4484-121
GCA_002255135.1	d__Archaea	p__Halobacteriota	c__Methanosarcinia	o__Methanosarcinales	f__EX4572-44	g__EX4572-44	s__EX4572-44 sp002254825	Methanosarcinales archaeon ex4484_138	NA
GCA_002256575.1	d__Archaea	p__Halobacteriota	c__Methanosarcinia	o__Methanotrichales	f__Methanotrichaceae	g__Methanothrix	s__Methanothrix sp002256595	Methanosaeta sp. NSM2	NA
GCA_002256595.1	d__Archaea	p__Halobacteriota	c__Methanosarcinia	o__Methanotrichales	f__Methanotrichaceae	g__Methanothrix	s__Methanothrix sp002256595	Methanosaeta sp. NSP1	NA
GCA_002286985.1	d__Archaea	p__Halobacteriota	c__Halobacteria	o__Halobacteriales	f__Haloferacaceae	g__Halorubrum	s__Halorubrum salipaludis	Halorubrum salipaludis	strain=WN019
GCA_002287175.1	d__Archaea	p__Methanobacteriota	c__Methanobacteria	o__Methanobacteriales	f__Methanobacteriaceae	g__Methanobacterium_D	s__Methanobacterium_D bryantii	Methanobacterium bryantii	strain=M.o.H.
GCA_002287195.1	d__Archaea	p__Methanobacteriota	c__Methanobacteria	o__Methanobacteriales	f__Methanobacteriaceae	g__Methanosphaera	s__Methanosphaera cuniculi	Methanosphaera cuniculi	strain=1R-7
GCA_002287215.1	d__Archaea	p__Halobacteriota	c__Methanomicrobia	o__Methanomicrobiales	f__Methanocorpusculaceae	g__Methanocorpusculum	s__Methanocorpusculum parvum	Methanocorpusculum parvum	strain=XII
GCA_002287235.1	d__Archaea	p__Halobacteriota	c__Methanosarcinia	o__Methanosarcinales	f__Methanosarcinaceae	g__Methanosarcina	s__Methanosarcina spelaei	Methanosarcina spelaei	strain=MC-15
GCA_002317795.1	d__Archaea	p__Thermoproteota	c__Nitrososphaeria	o__Nitrososphaerales	f__Nitrosopumilaceae	g__Nitrosopumilus	s__Nitrosopumilus sp002317795	Nitrososphaerota archaeon	NA
GCA_002355635.1	d__Archaea	p__Halobacteriota	c__Halobacteria	o__Halobacteriales	f__Haloferacaceae	g__Halopenitus	s__Halopenitus persicus_A	Halopenitus persicus	strain=CBA1233
GCA_002355655.1	d__Archaea	p__Halobacteriota	c__Halobacteria	o__Halobacteriales	f__Haloferacaceae	g__Halorubrum	s__Halorubrum trapanicum_A	Halorubrum trapanicum	strain=CBA1232
GCA_002356395.1	d__Archaea	p__Methanobacteriota	c__Methanobacteria	o__Methanobacteriales	f__Methanothermobacteraceae	g__Methanothermobacter	s__Methanothermobacter thermautotrophicus	Methanothermobacter sp. EMTCatA1	NA
GCA_002379115.1	d__Archaea	p__Halobacteriota	c__Halobacteria	o__Halobacteriales	f__Haloferacaceae	g__Halorubrum	s__Halorubrum ezzemoulense	Halorubrum ezzemoulense	strain=DSM 19316
GCA_002412065.1	d__Archaea	p__Nanoarchaeota	c__Nanoarchaeia	o__Parvarchaeales	f__Parvarchaeaceae	g__Parvarchaeum	s__Parvarchaeum acidiphilum	Candidatus Parvarchaeum acidiphilum ARMAN-4	NA
GCA_002412085.1	d__Archaea	p__Nanoarchaeota	c__Nanoarchaeia	o__Parvarchaeales	f__Parvarchaeaceae	g__Parvarchaeum	s__Parvarchaeum acidophilus	Candidatus Parvarchaeum acidophilus ARMAN-5	NA
GCA_002457145.1	d__Archaea	p__Thermoplasmatota	c__Poseidoniia	o__Poseidoniales	f__Thalassarchaeaceae	g__MGIIb-O3	s__MGIIb-O3 sp002457145	Marine Group II euryarchaeote MED-G38	NA
GCA_002457155.1	d__Archaea	p__Thermoplasmatota	c__Poseidoniia	o__Poseidoniales	f__Thalassarchaeaceae	g__MGIIb-O3	s__MGIIb-O3 sp002457155	Marine Group II euryarchaeote MED-G35	NA
GCA_002457195.1	d__Archaea	p__Thermoplasmatota	c__Poseidoniia	o__Poseidoniales	f__Thalassarchaeaceae	g__MGIIb-P	s__MGIIb-P sp002457195	Marine Group II euryarchaeote MED-G33	NA
GCA_002457555.1	d__Archaea	p__Thermoplasmatota	c__Poseidoniia	o__Poseidoniales	f__Thalassarchaeaceae	g__MGIIb-O1	s__MGIIb-O1 sp002457555	Marine Group II euryarchaeote MED-G37	NA
GCA_002457595.1	d__Archaea	p__Thermoplasmatota	c__Poseidoniia	o__Poseidoniales	f__Thalassarchaeaceae	g__MGIIb-O1	s__MGIIb-O1 sp002457595	Marine Group II euryarchaeote MED-G36	NA
GCA_002457605.1	d__Archaea	p__Thermoplasmatota	c__Poseidoniia	o__Poseidoniales	f__Thalassarchaeaceae	g__Thalassarchaeum	s__Thalassarchaeum sp002457605	Marine Group II euryarchaeote MED-G34	NA
GCA_002487355.1	d__Archaea	p__Halobacteriota	c__Methanosarcinia	o__Methanosarcinales	f__Methanoperedenaceae	g__Methanoperedens	s__Methanoperedens sp002487355	Candidatus Methanoperedens sp. BLZ2	NA
GCA_002490245.1	d__Archaea	p__Thermoproteota	c__Bathyarchaeia	o__B26-1	f__B24-2	g__B24-2	s__B24-2 sp002490245	Candidatus Bathyarchaeota archaeon B24-2	NA
GCA_002494345.1	d__Archaea	p__Halobacteriota	c__Halobacteria	o__Halobacteriales	f__Natrialbaceae	g__Natrinema	s__Natrinema ejinorense	Natrinema ejinorense	strain=JCM 13890
GCA_002494485.1	d__Archaea	p__Thermoproteota	c__Nitrososphaeria	o__Nitrososphaerales	f__UBA213	g__UBA213	s__UBA213 sp002713325	Nitrososphaerales archaeon UBA213	NA
GCA_002494495.1	d__Archaea	p__Methanobacteriota	c__Methanobacteria	o__Methanobacteriales	f__Methanobacteriaceae	g__Methanobacterium_A	s__Methanobacterium_A sp002494495	Methanobacterium sp. UBA294	NA
GCA_002494525.1	d__Archaea	p__Undinarchaeota	c__Undinarchaeia	o__Undinarchaeales	f__Undinarchaeaceae	g__Undinarchaeum	s__Undinarchaeum sp002687935	archaeon UBA490	NA
GCA_002494545.1	d__Archaea	p__Halobacteriota	c__Methanosarcinia	o__Methanosarcinales	f__Methanosarcinaceae	g__Methanosarcina	s__Methanosarcina sp002496565	Methanosarcina sp. UBA363	NA
GCA_002494565.1	d__Archaea	p__Thermoproteota	c__Nitrososphaeria	o__Nitrososphaerales	f__UBA57	g__UBA57	s__UBA57 sp002494565	Thaumarchaeota archaeon UBA57	NA
GCA_002494585.1	d__Archaea	p__Thermoplasmatota	c__Thermoplasmata	o__Methanomassiliicoccales	f__Methanomethylophilaceae	g__VadinCA11	s__VadinCA11 sp002498365	Methanomassiliicoccaceae archaeon UBA409	NA
GCA_002494605.1	d__Archaea	p__Thermoplasmatota	c__Poseidoniia	o__Poseidoniales	f__Poseidoniaceae	g__MGIIa-I	s__MGIIa-I sp002720095	Euryarchaeota archaeon UBA553	NA
GCA_002494625.1	d__Archaea	p__Halobacteriota	c__Archaeoglobi	o__Archaeoglobales	f__Archaeoglobaceae	g__Archaeoglobus_A	s__Archaeoglobus_A sp002494625	Archaeoglobus sp. UBA234	NA
GCA_002494645.1	d__Archaea	p__Thermoplasmatota	c__Poseidoniia	o__Poseidoniales	f__Poseidoniaceae	g__Poseidonia	s__Poseidonia sp002494645	Euryarchaeota archaeon UBA256	NA
GCA_002494665.1	d__Archaea	p__Halobacteriota	c__Archaeoglobi	o__Archaeoglobales	f__Archaeoglobaceae	g__Archaeoglobus	s__Archaeoglobus sp002507545	Archaeoglobus sp. UBA236	NA
GCA_002494685.1	d__Archaea	p__Thermoplasmatota	c__Poseidoniia	o__Poseidoniales	f__Poseidoniaceae	g__MGIIa-L1	s__MGIIa-L1 sp002726395	Euryarchaeota archaeon UBA90	NA
GCA_002494705.1	d__Archaea	p__Thermoplasmatota	c__Thermoplasmata	o__Methanomassiliicoccales	f__Methanomassiliicoccaceae	g__DTU008	s__DTU008 sp001512965	Methanomassiliicoccus sp. UBA238	NA
GCA_002494725.1	d__Archaea	p__Halobacteriota	c__Archaeoglobi	o__Archaeoglobales	f__Archaeoglobaceae	g__Geoglobus	s__Geoglobus sp002494725	Geoglobus sp. UBA235	NA
GCA_002494745.1	d__Archaea	p__Halobacteriota	c__Methanosarcinia_A	o__Methanosarcinales_A	f__Methermicoccaceae	g__Methermicoccus	s__Methermicoccus shengliensis	Methanotrichaceae archaeon UBA116	NA
GCA_002494765.1	d__Archaea	p__Thermoplasmatota	c__UBA186	o__UBA186	f__UBA186	g__UBA186	s__UBA186 sp002494765	Euryarchaeota archaeon UBA186	NA
GCA_002494785.1	d__Archaea	p__Methanobacteriota	c__Methanobacteria	o__Methanobacteriales	f__Methanobacteriaceae	g__UBA117	s__UBA117 sp002494785	Methanobacteriaceae archaeon UBA117	NA
GCA_002494795.1	d__Archaea	p__Methanobacteriota	c__Methanococci	o__Methanococcales	f__Methanococcaceae	g__Methanothermococcus	s__Methanothermococcus thermolithotrophicus	Methanococcaceae archaeon UBA115	NA
GCA_002494805.1	d__Archaea	p__Thermoplasmatota	c__Thermoplasmata	o__Methanomassiliicoccales	f__Methanomethylophilaceae	g__UBA71	s__UBA71 sp002506425	Methanomassiliicoccaceae archaeon UBA482	NA
GCA_002494845.1	d__Archaea	p__Halobacteriota	c__Methanosarcinia	o__Methanosarcinales	f__Methanosarcinaceae	g__Methanosarcina	s__Methanosarcina sp002499445	Methanosarcina sp. UBA43	NA
GCA_002494865.1	d__Archaea	p__Thermoplasmatota	c__Poseidoniia	o__Poseidoniales	f__Poseidoniaceae	g__MGIIa-L1	s__MGIIa-L1 sp002495945	Euryarchaeota archaeon UBA548	NA
GCA_002494885.1	d__Archaea	p__Methanobacteriota	c__Methanobacteria	o__Methanobacteriales	f__Methanobacteriaceae	g__Methanobacterium_D	s__Methanobacterium_D sp002494885	Methanobacterium sp. UBA44	NA
GCA_002494895.1	d__Archaea	p__Thermoproteota	c__Nitrososphaeria	o__Nitrososphaerales	f__Nitrososphaeraceae	g__Nitrososphaera	s__Nitrososphaera sp002494895	Nitrososphaera sp. UBA210	NA
GCA_002494905.1	d__Archaea	p__Thermoplasmatota	c__Poseidoniia	o__Poseidoniales	f__Thalassarchaeaceae	g__MGIIb-O5	s__MGIIb-O5 sp002501805	Euryarchaeota archaeon UBA498	NA
GCA_002494945.1	d__Archaea	p__Thermoplasmatota	c__Thermoplasmata	o__Methanomassiliicoccales	f__Methanomethylophilaceae	g__VadinCA11	s__VadinCA11 sp002505345	Methanomassiliicoccaceae archaeon UBA396	NA
GCA_002494965.1	d__Archaea	p__Thermoplasmatota	c__Poseidoniia	o__Poseidoniales	f__Thalassarchaeaceae	g__MGIIb-O2	s__MGIIb-O2 sp002504905	Euryarchaeota archaeon UBA497	NA
GCA_002494975.1	d__Archaea	p__Thermoplasmatota	c__Poseidoniia	o__Poseidoniales	f__Thalassarchaeaceae	g__MGIIb-O2	s__MGIIb-O2 sp002494975	Euryarchaeota archaeon UBA556	NA
GCA_002494985.1	d__Archaea	p__Thermoproteota	c__Nitrososphaeria	o__Nitrososphaerales	f__Nitrosopumilaceae	g__Nitrosopumilus	s__Nitrosopumilus sp002506665	Nitrosopumilus sp. UBA527	NA
GCA_002495025.1	d__Archaea	p__Thermoproteota	c__Thermoprotei_A	o__Sulfolobales	f__Desulfurococcaceae	g__UBA285	s__UBA285 sp002495025	Desulfurococcaceae archaeon UBA285	NA
GCA_002495045.1	d__Archaea	p__Thermoplasmatota	c__Poseidoniia	o__Poseidoniales	f__Poseidoniaceae	g__MGIIa-K1	s__MGIIa-K1 sp002710015	Euryarchaeota archaeon UBA41	NA
GCA_002495055.1	d__Archaea	p__Halobacteriota	c__Methanomicrobia	o__Methanomicrobiales	f__Methanoregulaceae	g__Methanoregula	s__Methanoregula sp002495055	Methanoregula sp. UBA247	NA
GCA_002495065.1	d__Archaea	p__Halobacteriota	c__Methanomicrobia	o__Methanomicrobiales	f__Methanoregulaceae	g__Methanoregula	s__Methanoregula sp002495065	Methanoregula sp. UBA471	NA
GCA_002495105.1	d__Archaea	p__Thermoplasmatota	c__Poseidoniia	o__Poseidoniales	f__Poseidoniaceae	g__Poseidonia	s__Poseidonia sp002497765	Euryarchaeota archaeon UBA11	NA
GCA_002495125.1	d__Archaea	p__Thermoplasmatota	c__Thermoplasmata	o__Methanomassiliicoccales	f__Methanomethylophilaceae	g__RumEn-M2	s__RumEn-M2 sp001421175	Methanomassiliicoccaceae archaeon UBA387	NA
GCA_002495135.1	d__Archaea	p__Thermoproteota	c__Nitrososphaeria	o__Nitrososphaerales	f__Nitrososphaeraceae	g__Nitrososphaera	s__Nitrososphaera sp002501845	Nitrososphaera sp. UBA239	NA
GCA_002495165.1	d__Archaea	p__Thermoplasmatota	c__Poseidoniia	o__Poseidoniales	f__Thalassarchaeaceae	g__MGIIb-O5	s__MGIIb-O5 sp002501605	Euryarchaeota archaeon UBA18	NA
GCA_002495185.1	d__Archaea	p__Thermoplasmatota	c__Thermoplasmata	o__UBA184	f__UBA184	g__UBA184	s__UBA184 sp002495185	Thermoplasmata archaeon UBA184	NA
GCA_002495205.1	d__Archaea	p__Thermoproteota	c__Nitrososphaeria	o__Nitrososphaerales	f__UBA183	g__UBA183	s__UBA183 sp002495205	Thaumarchaeota archaeon UBA183	NA
GCA_002495225.1	d__Archaea	p__Halobacteriota	c__Methanomicrobia	o__Methanomicrobiales	f__Methanosphaerulaceae	g__UBA288	s__UBA288 sp002495225	Methanoregulaceae archaeon UBA288	NA
GCA_002495235.1	d__Archaea	p__Thermoplasmatota	c__UBA186	o__UBA287	f__UBA287	g__UBA287	s__UBA287 sp002495235	Euryarchaeota archaeon UBA287	NA
GCA_002495245.1	d__Archaea	p__Thermoplasmatota	c__Poseidoniia	o__Poseidoniales	f__Thalassarchaeaceae	g__MGIIb-O5	s__MGIIb-O5 sp002498925	Euryarchaeota archaeon UBA503	NA
GCA_002495285.1	d__Archaea	p__Thermoplasmatota	c__Poseidoniia	o__Poseidoniales	f__Thalassarchaeaceae	g__MGIIb-O1	s__MGIIb-O1 sp002502175	Euryarchaeota archaeon UBA485	NA
GCA_002495305.1	d__Archaea	p__Thermoplasmatota	c__Poseidoniia	o__MGIII	f__CG-Epi1	g__UBA8886	s__UBA8886 sp002509165	Euryarchaeota archaeon UBA139	NA
GCA_002495315.1	d__Archaea	p__Thermoproteota	c__Nitrososphaeria	o__Nitrososphaerales	f__UBA141	g__UBA141	s__UBA141 sp002495315	Thaumarchaeota archaeon UBA141	NA
GCA_002495325.1	d__Archaea	p__Thermoplasmatota	c__Thermoplasmata	o__Methanomassiliicoccales	f__Methanomethylophilaceae	g__Methanomethylophilus	s__Methanomethylophilus sp002495325	Methanomassiliicoccaceae archaeon UBA593	NA
GCA_002495365.1	d__Archaea	p__Methanobacteriota	c__Methanobacteria	o__Methanobacteriales	f__Methanobacteriaceae	g__Methanobacterium_C	s__Methanobacterium_C sp002498385	Methanobacterium sp. UBA405	NA
GCA_002495385.1	d__Archaea	p__Thermoplasmatota	c__Poseidoniia	o__Poseidoniales	f__Thalassarchaeaceae	g__MGIIb-N1	s__MGIIb-N1 sp002499585	Euryarchaeota archaeon UBA191	NA
GCA_002495395.1	d__Archaea	p__Thermoplasmatota	c__Poseidoniia	o__Poseidoniales	f__Thalassarchaeaceae	g__Thalassarchaeum	s__Thalassarchaeum sp002698225	Euryarchaeota archaeon UBA174	NA
GCA_002495405.1	d__Archaea	p__Thermoplasmatota	c__Poseidoniia	o__Poseidoniales	f__Poseidoniaceae	g__MGIIa-L4	s__MGIIa-L4 sp002718195	Euryarchaeota archaeon UBA15	NA
GCA_002495445.1	d__Archaea	p__Methanobacteriota	c__Methanobacteria	o__Methanobacteriales	f__Methanobacteriaceae	g__Methanobacterium_A	s__Methanobacterium_A sp002494495	Methanobacterium sp. UBA311	NA
GCA_002495465.1	d__Archaea	p__Undinarchaeota	c__Undinarchaeia	o__Undinarchaeales	f__Undinarchaeaceae	g__Undinarchaeum	s__Undinarchaeum marinum	archaeon UBA55	NA
GCA_002495485.1	d__Archaea	p__Thermoproteota	c__Bathyarchaeia	o__40CM-2-53-6	f__40CM-2-53-6	g__40CM-2-53-6	s__40CM-2-53-6 sp002495485	Candidatus Bathyarchaeota archaeon UBA185	NA
GCA_002495495.1	d__Archaea	p__Thermoplasmatota	c__Thermoplasmata	o__Methanomassiliicoccales	f__Methanomethylophilaceae	g__VadinCA11	s__VadinCA11 sp002498365	Methanomassiliicoccaceae archaeon UBA394	NA
GCA_002495525.1	d__Archaea	p__Thermoplasmatota	c__Poseidoniia	o__Poseidoniales	f__Thalassarchaeaceae	g__MGIIb-O2	s__MGIIb-O2 sp002495525	Euryarchaeota archaeon UBA89	NA
GCA_002495535.1	d__Archaea	p__Thermoplasmatota	c__Poseidoniia	o__Poseidoniales	f__Poseidoniaceae	g__MGIIa-L1	s__MGIIa-L1 sp002495535	Euryarchaeota archaeon UBA433	NA
GCA_002495565.1	d__Archaea	p__Halobacteriota	c__Methanosarcinia	o__Methanosarcinales	f__Methanosarcinaceae	g__Methanosarcina	s__Methanosarcina sp002499445	Methanosarcina sp. UBA376	NA
GCA_002495575.1	d__Archaea	p__Thermoproteota	c__Nitrososphaeria	o__Nitrososphaerales	f__Nitrososphaeraceae	g__Nitrososphaera	s__Nitrososphaera sp002501845	Nitrososphaera sp. UBA216	NA
GCA_002495585.1	d__Archaea	p__Thermoplasmatota	c__Thermoplasmata	o__Methanomassiliicoccales	f__Methanomassiliicoccaceae	g__DTU008	s__DTU008 sp002504525	Methanomassiliicoccus sp. UBA292	NA
GCA_002495625.1	d__Archaea	p__Methanobacteriota	c__Methanobacteria	o__Methanobacteriales	f__Methanobacteriaceae	g__Methanobacterium_A	s__Methanobacterium_A sp002495625	Methanobacterium sp. UBA375	NA
GCA_002495645.1	d__Archaea	p__Thermoplasmatota	c__Poseidoniia	o__Poseidoniales	f__Poseidoniaceae	g__Poseidonia	s__Poseidonia sp002495645	Euryarchaeota archaeon UBA549	NA
GCA_002495665.1	d__Archaea	p__Thermoplasmatota	c__Thermoplasmata	o__Methanomassiliicoccales	f__Methanomethylophilaceae	g__VadinCA11	s__VadinCA11 sp002505345	Methanomassiliicoccaceae archaeon UBA378	NA
GCA_002495675.1	d__Archaea	p__Thermoplasmatota	c__Poseidoniia	o__Poseidoniales	f__Thalassarchaeaceae	g__MGIIb-N1	s__MGIIb-N1 sp002495675	Euryarchaeota archaeon UBA182	NA
GCA_002495685.1	d__Archaea	p__Methanobacteriota	c__Methanobacteria	o__Methanobacteriales	f__Methanobacteriaceae	g__UBA412	s__UBA412 sp002495685	Methanobrevibacter sp. UBA412	NA
GCA_002495725.1	d__Archaea	p__Halobacteriota	c__Methanosarcinia	o__Methanosarcinales	f__Methanosarcinaceae	g__Methanosarcina	s__Methanosarcina sp002496565	Methanosarcina sp. UBA411	NA
GCA_002495735.1	d__Archaea	p__Thermoplasmatota	c__Poseidoniia	o__Poseidoniales	f__Thalassarchaeaceae	g__Thalassarchaeum	s__Thalassarchaeum sp002495735	Euryarchaeota archaeon UBA54	NA
GCA_002495765.1	d__Archaea	p__Thermoplasmatota	c__Poseidoniia	o__Poseidoniales	f__Thalassarchaeaceae	g__MGIIb-N2	s__MGIIb-N2 sp002697105	Euryarchaeota archaeon UBA84	NA
GCA_002495775.1	d__Archaea	p__Halobacteriota	c__Methanomicrobia	o__Methanomicrobiales	f__Methanoregulaceae	g__Methanoregula	s__Methanoregula sp002502245	Methanoregula sp. UBA244	NA
GCA_002495805.1	d__Archaea	p__Methanobacteriota	c__Methanobacteria	o__Methanobacteriales	f__Methanobacteriaceae	g__Methanobacterium_A	s__Methanobacterium_A sp002494495	Methanobacterium sp. UBA419	NA
GCA_002495815.1	d__Archaea	p__Thermoplasmatota	c__Poseidoniia	o__Poseidoniales	f__Thalassarchaeaceae	g__MGIIb-O5	s__MGIIb-O5 sp002498925	Euryarchaeota archaeon UBA595	NA
GCA_002495845.1	d__Archaea	p__Thermoproteota	c__Thermoprotei_A	o__Sulfolobales	f__Sulfolobaceae	g__Sulfuracidifex	s__Sulfuracidifex sp002495845	Sulfolobus sp. UBA167	NA
GCA_002495885.1	d__Archaea	p__Halobacteriota	c__UBA148	o__UBA148	f__UBA148	g__UBA148	s__UBA148 sp002495885	Methanocellaceae archaeon UBA148	NA
GCA_002495905.1	d__Archaea	p__Thermoproteota	c__Nitrososphaeria	o__Nitrososphaerales	f__UBA57	g__UBA57	s__UBA57 sp002495905	Thaumarchaeota archaeon UBA223	NA
GCA_002495925.1	d__Archaea	p__Thermoplasmatota	c__Poseidoniia	o__Poseidoniales	f__Thalassarchaeaceae	g__Thalassarchaeum	s__Thalassarchaeum sp002714745	Euryarchaeota archaeon UBA101	NA
GCA_002495945.1	d__Archaea	p__Thermoplasmatota	c__Poseidoniia	o__Poseidoniales	f__Poseidoniaceae	g__MGIIa-L1	s__MGIIa-L1 sp002495945	Euryarchaeota archaeon UBA13	NA
GCA_002495965.1	d__Archaea	p__Thermoproteota	c__Nitrososphaeria	o__Nitrososphaerales	f__Nitrososphaeraceae	g__Nitrosopolaris	s__Nitrosopolaris nunavutensis	Candidatus Nitrosopolaris nunavutensis	NA
GCA_002495975.1	d__Archaea	p__Thermoplasmatota	c__Thermoplasmata	o__Thermoplasmatales	f__Thermoplasmataceae	g__Cuniculiplasma	s__Cuniculiplasma divulgatum	Thermoplasmatales archaeon UBA511	NA
GCA_002496005.1	d__Archaea	p__Thermoplasmatota	c__Poseidoniia	o__Poseidoniales	f__Thalassarchaeaceae	g__MGIIb-O3	s__MGIIb-O3 sp002725315	Euryarchaeota archaeon UBA194	NA
GCA_002496015.1	d__Archaea	p__Nanoarchaeota	c__Nanoarchaeia	o__Pacearchaeales	f__GW2011-AR1	g__UBA73	s__UBA73 sp002496015	Candidatus Pacearchaeota archaeon UBA73	NA
GCA_002496045.1	d__Archaea	p__Thermoproteota	c__Thermoprotei_A	o__Sulfolobales	f__Desulfurococcaceae	g__UBA285	s__UBA285 sp002495025	Desulfurococcaceae archaeon UBA150	NA
GCA_002496065.1	d__Archaea	p__Methanobacteriota	c__Methanobacteria	o__Methanobacteriales	f__Methanobacteriaceae	g__Methanobrevibacter_A	s__Methanobrevibacter_A sp002496065	Methanobrevibacter sp. UBA586	NA
GCA_002496085.1	d__Archaea	p__Halobacteriota	c__Methanosarcinia	o__Methanotrichales	f__Methanotrichaceae	g__Methanothrix	s__Methanothrix soehngenii	Methanosaeta sp. UBA458	NA
GCA_002496095.1	d__Archaea	p__Halobacteriota	c__Methanosarcinia	o__Methanosarcinales	f__Methanosarcinaceae	g__Methanosarcina	s__Methanosarcina mazei	Methanosarcina mazei	NA
GCA_002496125.1	d__Archaea	p__Thermoplasmatota	c__Poseidoniia	o__MGIII	f__CG-Epi1	g__CG-Epi1	s__CG-Epi1 sp002506485	Euryarchaeota archaeon UBA138	NA
GCA_002496135.1	d__Archaea	p__Halobacteriota	c__Methanomicrobia	o__Methanomicrobiales	f__Methanospirillaceae	g__Methanospirillum	s__Methanospirillum hungatei	Methanomicrobiales archaeon UBA81	NA
GCA_002496165.1	d__Archaea	p__Halobacteriota	c__Methanosarcinia	o__Methanotrichales	f__Methanotrichaceae	g__Methanothrix_A	s__Methanothrix_A harundinacea_D	Methanothrix harundinacea	NA
GCA_002496175.1	d__Archaea	p__Thermoplasmatota	c__Poseidoniia	o__Poseidoniales	f__Poseidoniaceae	g__MGIIa-K1	s__MGIIa-K1 sp002715725	Euryarchaeota archaeon UBA85	NA
GCA_002496205.1	d__Archaea	p__Thermoplasmatota	c__Poseidoniia	o__Poseidoniales	f__Thalassarchaeaceae	g__MGIIb-O1	s__MGIIb-O1 sp002502175	Euryarchaeota archaeon UBA66	NA
GCA_002496215.1	d__Archaea	p__Nanoarchaeota	c__Nanoarchaeia	o__Parvarchaeales	f__Parvarchaeaceae	g__Parvarchaeum	s__Parvarchaeum acidiphilum	Candidatus Parvarchaeota archaeon UBA519	NA
GCA_002496245.1	d__Archaea	p__Thermoplasmatota	c__Poseidoniia	o__Poseidoniales	f__Poseidoniaceae	g__MGIIa-L3	s__MGIIa-L3 sp002731395	Euryarchaeota archaeon UBA100	NA
GCA_002496255.1	d__Archaea	p__Halobacteriota	c__Methanomicrobia	o__Methanomicrobiales	f__Methanoculleaceae	g__Methanoculleus	s__Methanoculleus marisnigri_B	Methanoculleus marisnigri	NA
GCA_002496285.1	d__Archaea	p__Thermoplasmatota	c__Poseidoniia	o__Poseidoniales	f__Poseidoniaceae	g__Poseidonia	s__Poseidonia sp002497765	Euryarchaeota archaeon UBA546	NA
GCA_002496295.1	d__Archaea	p__Methanobacteriota	c__Methanobacteria	o__Methanobacteriales	f__Methanobacteriaceae	g__UBA412	s__UBA412 sp002495685	Methanobrevibacter sp. UBA337	NA
GCA_002496325.1	d__Archaea	p__Halobacteriota	c__Methanosarcinia	o__Methanosarcinales	f__Methanoperedenaceae	g__Methanoperedens	s__Methanoperedens nitroreducens	Candidatus Methanoperedens sp. UBA453	NA
GCA_002496345.1	d__Archaea	p__Thermoplasmatota	c__Thermoplasmata	o__Methanomassiliicoccales	f__Methanomassiliicoccaceae	g__DTU008	s__DTU008 sp002504525	Methanomassiliicoccus sp. UBA382	NA
GCA_002496355.1	d__Archaea	p__Thermoplasmatota	c__E2	o__DHVEG-1	f__DHVEG-1	g__SM1-50	s__SM1-50 sp002496355	Euryarchaeota archaeon UBA346	NA
GCA_002496385.1	d__Archaea	p__Thermoplasmatota	c__Thermoplasmata	o__SG8-5	f__SG8-5	g__UBA147	s__UBA147 sp002496385	Methanomassiliicoccales archaeon UBA147	NA
GCA_002496395.1	d__Archaea	p__Halobacteriota	c__Methanomicrobia	o__Methanomicrobiales	f__Methanocorpusculaceae	g__Methanocalculus	s__Methanocalculus sp002496395	Methanocorpusculaceae archaeon UBA456	NA
GCA_002496425.1	d__Archaea	p__Thermoproteota	c__Thermoprotei_A	o__Sulfolobales	f__Acidilobaceae	g__Acidilobus	s__Acidilobus sp002496425	Acidilobaceae archaeon UBA162	NA
GCA_002496435.1	d__Archaea	p__Thermoplasmatota	c__Poseidoniia	o__Poseidoniales	f__Thalassarchaeaceae	g__MGIIb-O2	s__MGIIb-O2 sp002498985	Euryarchaeota archaeon UBA30	NA
GCA_002496465.1	d__Archaea	p__Halobacteriota	c__Methanosarcinia	o__Methanotrichales	f__Methanotrichaceae	g__Methanothrix	s__Methanothrix soehngenii	Methanosaeta sp. UBA356	NA
GCA_002496475.1	d__Archaea	p__Thermoproteota	c__Thermoprotei	o__Thermoproteales	f__Thermocladiaceae	g__Vulcanisaeta	s__Vulcanisaeta sp002496475	Vulcanisaeta sp. UBA163	NA
GCA_002496485.1	d__Archaea	p__Thermoplasmatota	c__Poseidoniia	o__Poseidoniales	f__Thalassarchaeaceae	g__MGIIb-O3	s__MGIIb-O3 sp002496485	Euryarchaeota archaeon UBA36	NA
GCA_002496495.1	d__Archaea	p__Halobacteriota	c__Methanosarcinia	o__Methanosarcinales	f__Methanosarcinaceae	g__Methanosarcina	s__Methanosarcina thermophila	Methanosarcina sp. UBA47	NA
GCA_002496545.1	d__Archaea	p__Methanobacteriota	c__Methanobacteria	o__Methanobacteriales	f__Methanobacteriaceae	g__Methanobacterium	s__Methanobacterium formicicum	Methanobacterium sp. UBA74	NA
GCA_002496555.1	d__Archaea	p__Methanobacteriota	c__Methanobacteria	o__Methanobacteriales	f__Methanobacteriaceae	g__Methanobacterium_C	s__Methanobacterium_C sp002498385	Methanobacterium sp. UBA290	NA
GCA_002496565.1	d__Archaea	p__Halobacteriota	c__Methanosarcinia	o__Methanosarcinales	f__Methanosarcinaceae	g__Methanosarcina	s__Methanosarcina sp002496565	Methanosarcina sp. UBA289	NA
GCA_002496595.1	d__Archaea	p__Thermoplasmatota	c__Poseidoniia	o__Poseidoniales	f__Poseidoniaceae	g__MGIIa-L1	s__MGIIa-L1 sp002729095	Euryarchaeota archaeon UBA621	NA
GCA_002496625.1	d__Archaea	p__Thermoproteota	c__Nitrososphaeria	o__Nitrososphaerales	f__Nitrososphaeraceae	g__Nitrosopolaris	s__Nitrosopolaris nunavutensis	Candidatus Nitrosopolaris nunavutensis	NA
GCA_002496635.1	d__Archaea	p__Thermoplasmatota	c__Poseidoniia	o__Poseidoniales	f__Poseidoniaceae	g__MGIIa-L2	s__MGIIa-L2 sp002496635	Euryarchaeota archaeon UBA82	NA
GCA_002496665.1	d__Archaea	p__Thermoplasmatota	c__Thermoplasmata	o__Thermoplasmatales	f__Thermoplasmataceae	g__UBA509	s__UBA509 sp002498845	Thermoplasmatales archaeon UBA263	NA
GCA_002496675.1	d__Archaea	p__Halobacteriota	c__Halobacteria	o__Halobacteriales	f__UBA12382	g__UBA12382	s__UBA12382 sp002503845	Euryarchaeota archaeon UBA67	NA
GCA_002496705.1	d__Archaea	p__Thermoplasmatota	c__Thermoplasmata	o__Thermoplasmatales	f__Thermoplasmataceae	g__Cuniculiplasma	s__Cuniculiplasma divulgatum	Thermoplasmatales archaeon UBA572	NA
GCA_002496725.1	d__Archaea	p__Thermoplasmatota	c__Poseidoniia	o__Poseidoniales	f__Thalassarchaeaceae	g__MGIIb-O5	s__MGIIb-O5 sp002496725	Euryarchaeota archaeon UBA181	NA
GCA_002496735.1	d__Archaea	p__Thermoplasmatota	c__Poseidoniia	o__Poseidoniales	f__Thalassarchaeaceae	g__MGIIb-O3	s__MGIIb-O3 sp002503285	Euryarchaeota archaeon UBA132	NA
GCA_002496755.1	d__Archaea	p__Halobacteriota	c__Methanomicrobia	o__Methanomicrobiales	f__Methanoculleaceae	g__Methanoculleus	s__Methanoculleus sp002508705	Methanoculleus sp. UBA406	NA
GCA_002496785.1	d__Archaea	p__Thermoplasmatota	c__Thermoplasmata	o__Methanomassiliicoccales	f__Methanomethylophilaceae	g__RumEn-M2	s__RumEn-M2 sp001421175	Methanomassiliicoccaceae archaeon UBA407	NA
GCA_002496805.1	d__Archaea	p__Methanobacteriota	c__Methanobacteria	o__Methanobacteriales	f__Methanobacteriaceae	g__Methanobacterium	s__Methanobacterium sp002496805	Methanobacterium sp. UBA353	NA
GCA_002496825.1	d__Archaea	p__Halobacteriota	c__Halobacteria	o__Halobacteriales	f__UBA12382	g__UBA12382	s__UBA12382 sp002503845	Euryarchaeota archaeon UBA198	NA
GCA_002496845.1	d__Archaea	p__Thermoplasmatota	c__Poseidoniia	o__Poseidoniales	f__Poseidoniaceae	g__MGIIa-L3	s__MGIIa-L3 sp002496845	Euryarchaeota archaeon UBA495	NA
GCA_002496855.1	d__Archaea	p__Halobacteriota	c__Methanomicrobia	o__Methanomicrobiales	f__Methanoregulaceae	g__Methanolinea_A	s__Methanolinea_A sp002506105	Methanolinea sp. UBA145	NA
GCA_002496885.1	d__Archaea	p__Thermoplasmatota	c__Poseidoniia	o__Poseidoniales	f__Thalassarchaeaceae	g__MGIIb-O1	s__MGIIb-O1 sp002497895	Euryarchaeota archaeon UBA104	NA
GCA_002496905.1	d__Archaea	p__Thermoplasmatota	c__Poseidoniia	o__Poseidoniales	f__Thalassarchaeaceae	g__MGIIb-O1	s__MGIIb-O1 sp002496905	Euryarchaeota archaeon UBA105	NA
GCA_002496925.1	d__Archaea	p__Thermoplasmatota	c__Poseidoniia	o__Poseidoniales	f__Thalassarchaeaceae	g__MGIIb-O2	s__MGIIb-O2 sp002686525	Euryarchaeota archaeon UBA227	NA
GCA_002496945.1	d__Archaea	p__Thermoplasmatota	c__Thermoplasmata	o__Methanomassiliicoccales	f__Methanomethylophilaceae	g__Methanogranum	s__Methanogranum sp002506905	Methanomassiliicoccaceae archaeon UBA408	NA
GCA_002496955.1	d__Archaea	p__Thermoplasmatota	c__Poseidoniia	o__Poseidoniales	f__Poseidoniaceae	g__MGIIa-L1	s__MGIIa-L1 sp002496955	Euryarchaeota archaeon UBA128	NA
GCA_002496985.1	d__Archaea	p__Thermoplasmatota	c__Poseidoniia	o__Poseidoniales	f__Thalassarchaeaceae	g__MGIIb-Q1	s__MGIIb-Q1 sp002727675	Euryarchaeota archaeon UBA196	NA
GCA_002496995.1	d__Archaea	p__Thermoplasmatota	c__Thermoplasmata	o__Thermoplasmatales	f__Thermoplasmataceae	g__GCA-000496135	s__GCA-000496135 sp000496135	Thermoplasmatales archaeon UBA576	NA
GCA_002497025.1	d__Archaea	p__Thermoplasmatota	c__Poseidoniia	o__Poseidoniales	f__Thalassarchaeaceae	g__MGIIb-O1	s__MGIIb-O1 sp002497025	Euryarchaeota archaeon UBA126	NA
GCA_002497045.1	d__Archaea	p__Halobacteriota	c__Methanosarcinia	o__Methanosarcinales	f__Methanosarcinaceae	g__Methanosarcina	s__Methanosarcina thermophila	Methanosarcina sp. UBA135	NA
GCA_002497065.1	d__Archaea	p__Thermoplasmatota	c__Thermoplasmata	o__Thermoplasmatales	f__Thermoplasmataceae	g__UBA509	s__UBA509 sp002498845	Thermoplasmatales archaeon UBA574	NA
GCA_002497075.1	d__Archaea	p__Thermoplasmatota	c__Thermoplasmata	o__Methanomassiliicoccales	f__UBA472	g__UBA472	s__UBA472 sp002497075	Methanomassiliicoccaceae archaeon UBA472	NA
GCA_002497105.1	d__Archaea	p__Methanobacteriota	c__Methanobacteria	o__Methanobacteriales	f__Methanobacteriaceae	g__Methanobacterium_A	s__Methanobacterium_A sp002494495	Methanobacterium sp. UBA305	NA
GCA_002497125.1	d__Archaea	p__Thermoplasmatota	c__Poseidoniia	o__Poseidoniales	f__Thalassarchaeaceae	g__MGIIb-N1	s__MGIIb-N1 sp002499585	Euryarchaeota archaeon UBA531	NA
GCA_002497145.1	d__Archaea	p__Thermoplasmatota	c__Poseidoniia	o__Poseidoniales	f__Poseidoniaceae	g__MGIIa-I	s__MGIIa-I sp002720095	Euryarchaeota archaeon UBA68	NA
GCA_002497155.1	d__Archaea	p__Thermoplasmatota	c__Thermoplasmata	o__Methanomassiliicoccales	f__Methanomethylophilaceae	g__RumEn-M2	s__RumEn-M2 sp002502965	Methanomassiliicoccaceae archaeon UBA309	NA
GCA_002497185.1	d__Archaea	p__Thermoplasmatota	c__Poseidoniia	o__Poseidoniales	f__Thalassarchaeaceae	g__Thalassarchaeum	s__Thalassarchaeum sp002501885	Euryarchaeota archaeon UBA225	NA
GCA_002497195.1	d__Archaea	p__Thermoplasmatota	c__Thermoplasmata	o__Methanomassiliicoccales	f__Methanomethylophilaceae	g__VadinCA11	s__VadinCA11 sp002498365	Methanomassiliicoccaceae archaeon UBA354	NA
GCA_002497225.1	d__Archaea	p__Thermoplasmatota	c__Poseidoniia	o__Poseidoniales	f__Poseidoniaceae	g__Poseidonia	s__Poseidonia sp002714305	Euryarchaeota archaeon UBA253	NA
GCA_002497245.1	d__Archaea	p__Thermoplasmatota	c__Poseidoniia	o__Poseidoniales	f__Thalassarchaeaceae	g__MGIIb-O2	s__MGIIb-O2 sp002497245	Euryarchaeota archaeon UBA439	NA
GCA_002497265.1	d__Archaea	p__Thermoplasmatota	c__Poseidoniia	o__Poseidoniales	f__Thalassarchaeaceae	g__MGIIb-O2	s__MGIIb-O2 sp002686525	Euryarchaeota archaeon UBA9	NA
GCA_002497285.1	d__Archaea	p__Nanoarchaeota	c__Nanoarchaeia	o__Pacearchaeales	f__GW2011-AR1	g__UBA92	s__UBA92 sp002497285	Candidatus Pacearchaeota archaeon UBA92	NA
GCA_002497295.1	d__Archaea	p__Thermoplasmatota	c__Poseidoniia	o__Poseidoniales	f__Thalassarchaeaceae	g__MGIIb-N1	s__MGIIb-N1 sp002497295	Euryarchaeota archaeon UBA171	NA
GCA_002497315.1	d__Archaea	p__Thermoplasmatota	c__Poseidoniia	o__Poseidoniales	f__Thalassarchaeaceae	g__MGIIb-O5	s__MGIIb-O5 sp002730095	Euryarchaeota archaeon UBA560	NA
GCA_002497345.1	d__Archaea	p__Thermoproteota	c__Thermoprotei	o__Thermoproteales	f__Thermoproteaceae	g__Thermoproteus	s__Thermoproteus sp002497345	Thermoproteus sp. UBA157	NA
GCA_002497365.1	d__Archaea	p__Methanobacteriota	c__Methanobacteria	o__Methanobacteriales	f__Methanobacteriaceae	g__Methanobacterium_A	s__Methanobacterium_A sp002494495	Methanobacterium sp. UBA42	NA
GCA_002497385.1	d__Archaea	p__Thermoplasmatota	c__Poseidoniia	o__Poseidoniales	f__Poseidoniaceae	g__MGIIa-L3	s__MGIIa-L3 sp002722135	Euryarchaeota archaeon UBA547	NA
GCA_002497395.1	d__Archaea	p__Methanobacteriota	c__Methanobacteria	o__Methanobacteriales	f__Methanobacteriaceae	g__Methanobacterium_C	s__Methanobacterium_C sp002498385	Methanobacterium sp. UBA295	NA
GCA_002497405.1	d__Archaea	p__Thermoplasmatota	c__Poseidoniia	o__Poseidoniales	f__Poseidoniaceae	g__MGIIa-L2	s__MGIIa-L2 sp002722615	Euryarchaeota archaeon UBA63	NA
GCA_002497445.1	d__Archaea	p__Halobacteriota	c__Methanomicrobia	o__Methanomicrobiales	f__Methanoregulaceae	g__Methanoregula	s__Methanoregula sp002495055	Methanoregula sp. UBA450	NA
GCA_002497465.1	d__Archaea	p__Thermoplasmatota	c__Poseidoniia	o__Poseidoniales	f__Thalassarchaeaceae	g__MGIIb-N1	s__MGIIb-N1 sp002499585	Euryarchaeota archaeon UBA603	NA
GCA_002497475.1	d__Archaea	p__Thermoplasmatota	c__Thermoplasmata	o__Methanomassiliicoccales	f__Methanomethylophilaceae	g__UBA71	s__UBA71 sp002506425	Methanomassiliicoccaceae archaeon UBA483	NA
GCA_002497525.1	d__Archaea	p__Thermoplasmatota	c__Poseidoniia	o__Poseidoniales	f__Thalassarchaeaceae	g__Thalassarchaeum	s__Thalassarchaeum sp002501885	Euryarchaeota archaeon UBA109	NA
GCA_002497545.1	d__Archaea	p__Thermoplasmatota	c__Poseidoniia	o__Poseidoniales	f__Thalassarchaeaceae	g__MGIIb-O3	s__MGIIb-O3 sp002722735	Euryarchaeota archaeon UBA622	NA
GCA_002497555.1	d__Archaea	p__Halobacteriota	c__Methanosarcinia	o__Methanotrichales	f__Methanotrichaceae	g__Methanothrix_A	s__Methanothrix_A sp001602645	Methanothrix harundinacea	NA
GCA_002497565.1	d__Archaea	p__Thermoplasmatota	c__Poseidoniia	o__Poseidoniales	f__Poseidoniaceae	g__MGIIa-L2	s__MGIIa-L2 sp002499195	Euryarchaeota archaeon UBA179	NA
GCA_002497605.1	d__Archaea	p__Thermoplasmatota	c__Thermoplasmata	o__Thermoplasmatales	f__Thermoplasmataceae	g__UBA509	s__UBA509 sp002498845	Thermoplasmatales archaeon UBA580	NA
GCA_002497625.1	d__Archaea	p__Thermoplasmatota	c__Thermoplasmata	o__Thermoplasmatales	f__Thermoplasmataceae	g__Cuniculiplasma	s__Cuniculiplasma divulgatum	Thermoplasmatales archaeon UBA579	NA
GCA_002497645.1	d__Archaea	p__Thermoplasmatota	c__Poseidoniia	o__Poseidoniales	f__Poseidoniaceae	g__MGIIa-L3	s__MGIIa-L3 sp002722135	Euryarchaeota archaeon UBA12	NA
GCA_002497655.1	d__Archaea	p__Methanobacteriota	c__Methanobacteria	o__Methanobacteriales	f__Methanobacteriaceae	g__Methanobacterium_A	s__Methanobacterium_A sp002494495	Methanobacterium sp. UBA428	NA
GCA_002497685.1	d__Archaea	p__Thermoplasmatota	c__Poseidoniia	o__MGIII	f__CG-Epi1	g__CG-Epi1	s__CG-Epi1 sp002497685	Euryarchaeota archaeon UBA169	NA
GCA_002497705.1	d__Archaea	p__Halobacteriota	c__Methanosarcinia	o__Methanotrichales	f__Methanotrichaceae	g__Methanothrix_A	s__Methanothrix_A harundinacea_B	Methanothrix harundinacea	NA
GCA_002497725.1	d__Archaea	p__Halobacteriota	c__Methanomicrobia	o__Methanomicrobiales	f__Methanocorpusculaceae	g__Methanocorpusculum	s__Methanocorpusculum sp002498375	Methanocorpusculum sp. UBA592	NA
GCA_002497745.1	d__Archaea	p__Thermoplasmatota	c__Poseidoniia	o__Poseidoniales	f__Poseidoniaceae	g__MGIIa-L3	s__MGIIa-L3 sp002722135	Euryarchaeota archaeon UBA484	NA
GCA_002497765.1	d__Archaea	p__Thermoplasmatota	c__Poseidoniia	o__Poseidoniales	f__Poseidoniaceae	g__Poseidonia	s__Poseidonia sp002497765	Euryarchaeota archaeon UBA486	NA
GCA_002497785.1	d__Archaea	p__Halobacteriota	c__Methanomicrobia	o__Methanomicrobiales	f__Methanoregulaceae	g__UBA9949	s__UBA9949 sp002499905	Methanolinea sp. UBA144	NA
GCA_002497805.1	d__Archaea	p__Thermoplasmatota	c__Poseidoniia	o__Poseidoniales	f__Poseidoniaceae	g__MGIIa-L1	s__MGIIa-L1 sp002496955	Euryarchaeota archaeon UBA599	NA
GCA_002497815.1	d__Archaea	p__Thermoplasmatota	c__Thermoplasmata	o__SG8-5	f__SG8-5	g__UBA147	s__UBA147 sp002499085	Methanomassiliicoccales archaeon UBA149	NA
GCA_002497845.1	d__Archaea	p__Thermoplasmatota	c__Poseidoniia	o__Poseidoniales	f__Poseidoniaceae	g__MGIIa-I	s__MGIIa-I sp002720095	Euryarchaeota archaeon UBA620	NA
GCA_002497865.1	d__Archaea	p__Thermoplasmatota	c__E2	o__DHVEG-1	f__DHVEG-1	g__SM1-50	s__SM1-50 sp002496355	Euryarchaeota archaeon UBA65	NA
GCA_002497885.1	d__Archaea	p__Thermoplasmatota	c__Poseidoniia	o__Poseidoniales	f__Poseidoniaceae	g__MGIIa-L1	s__MGIIa-L1 sp002496955	Euryarchaeota archaeon UBA21	NA
GCA_002497895.1	d__Archaea	p__Thermoplasmatota	c__Poseidoniia	o__Poseidoniales	f__Thalassarchaeaceae	g__MGIIb-O1	s__MGIIb-O1 sp002497895	Euryarchaeota archaeon UBA175	NA
GCA_002497905.1	d__Archaea	p__Thermoplasmatota	c__Poseidoniia	o__Poseidoniales	f__Thalassarchaeaceae	g__MGIIb-N2	s__MGIIb-N2 sp002497905	Euryarchaeota archaeon UBA251	NA
GCA_002497945.1	d__Archaea	p__Halobacteriota	c__Methanosarcinia	o__Methanotrichales	f__Methanotrichaceae	g__Methanothrix_A	s__Methanothrix_A harundinacea_E	Methanothrix harundinacea	NA
GCA_002497965.1	d__Archaea	p__Halobacteriota	c__Methanomicrobia	o__Methanomicrobiales	f__Methanoculleaceae	g__Methanoculleus	s__Methanoculleus sp002497965	Methanomicrobiaceae archaeon UBA436	NA
GCA_002497985.1	d__Archaea	p__Thermoplasmatota	c__Poseidoniia	o__Poseidoniales	f__Thalassarchaeaceae	g__MGIIb-O5	s__MGIIb-O5 sp002497985	Euryarchaeota archaeon UBA4	NA
GCA_002497995.1	d__Archaea	p__Thermoplasmatota	c__Thermoplasmata	o__Methanomassiliicoccales	f__Methanomassiliicoccaceae	g__DTU008	s__DTU008 sp002504525	Methanomassiliicoccus sp. UBA393	NA
GCA_002498025.1	d__Archaea	p__Halobacteriota	c__Methanomicrobia	o__Methanomicrobiales	f__Methanoculleaceae	g__Methanoculleus	s__Methanoculleus sp002508705	Methanoculleus sp. UBA307	NA
GCA_002498055.1	d__Archaea	p__Methanobacteriota	c__Methanobacteria	o__Methanobacteriales	f__Methanobacteriaceae	g__Methanobacterium_A	s__Methanobacterium_A sp002494495	Methanobacterium sp. UBA355	NA
GCA_002498065.1	d__Archaea	p__Halobacteriota	c__Methanomicrobia	o__Methanomicrobiales	f__Methanoculleaceae	g__Methanoculleus	s__Methanoculleus sp002498065	Methanoculleus sp. UBA208	NA
GCA_002498105.1	d__Archaea	p__Thermoproteota	c__Nitrososphaeria	o__Nitrososphaerales	f__Nitrosopumilaceae	g__Nitrosotenuis	s__Nitrosotenuis sp002499525	Nitrosopumilales archaeon UBA219	NA
GCA_002498125.1	d__Archaea	p__Nanoarchaeota	c__Nanoarchaeia	o__Woesearchaeales	f__UBA525	g__UBA525	s__UBA525 sp002498125	Candidatus Woesearchaeota archaeon UBA525	NA
GCA_002498135.1	d__Archaea	p__Thermoplasmatota	c__Poseidoniia	o__Poseidoniales	f__Poseidoniaceae	g__MGIIa-I	s__MGIIa-I sp002720275	Euryarchaeota archaeon UBA87	NA
GCA_002498145.1	d__Archaea	p__Thermoplasmatota	c__Poseidoniia	o__Poseidoniales	f__Thalassarchaeaceae	g__MGIIb-O2	s__MGIIb-O2 sp002494975	Euryarchaeota archaeon UBA260	NA
GCA_002498185.1	d__Archaea	p__Thermoplasmatota	c__Poseidoniia	o__Poseidoniales	f__Poseidoniaceae	g__MGIIa-K1	s__MGIIa-K1 sp002498185	Euryarchaeota archaeon UBA10	NA
GCA_002498205.1	d__Archaea	p__Thermoplasmatota	c__Poseidoniia	o__Poseidoniales	f__Poseidoniaceae	g__MGIIa-I	s__MGIIa-I sp002498205	Euryarchaeota archaeon UBA596	NA
GCA_002498215.1	d__Archaea	p__Thermoplasmatota	c__Poseidoniia	o__Poseidoniales	f__Thalassarchaeaceae	g__MGIIb-O1	s__MGIIb-O1 sp002496905	Euryarchaeota archaeon UBA38	NA
GCA_002498225.1	d__Archaea	p__Methanobacteriota	c__Methanobacteria	o__Methanobacteriales	f__Methanobacteriaceae	g__Methanobacterium_C	s__Methanobacterium_C sp002498385	Methanobacterium sp. UBA327	NA
GCA_002498265.1	d__Archaea	p__Thermoplasmatota	c__Poseidoniia	o__Poseidoniales	f__Poseidoniaceae	g__MGIIa-L1	s__MGIIa-L1 sp002729095	Euryarchaeota archaeon UBA35	NA
GCA_002498285.1	d__Archaea	p__Thermoplasmatota	c__Thermoplasmata	o__Methanomassiliicoccales	f__Methanomassiliicoccaceae	g__DTU008	s__DTU008 sp002498285	Methanomassiliicoccus sp. UBA386	NA
GCA_002498295.1	d__Archaea	p__Halobacteriota	c__Methanomicrobia	o__Methanomicrobiales	f__Methanoregulaceae	g__Methanoregula	s__Methanoregula sp002502245	Methanoregula sp. UBA434	NA
GCA_002498315.1	d__Archaea	p__Halobacteriota	c__Methanomicrobia	o__Methanomicrobiales	f__Methanofollaceae	g__Methanofollis	s__Methanofollis sp002498315	Methanofollis sp. UBA420	NA
GCA_002498345.1	d__Archaea	p__Thermoproteota	c__Nitrososphaeria	o__Nitrososphaerales	f__Nitrososphaeraceae	g__Nitrosopolaris	s__Nitrosopolaris nunavutensis	Candidatus Nitrosopolaris nunavutensis	NA
GCA_002498365.1	d__Archaea	p__Thermoplasmatota	c__Thermoplasmata	o__Methanomassiliicoccales	f__Methanomethylophilaceae	g__VadinCA11	s__VadinCA11 sp002498365	Methanomassiliicoccaceae archaeon UBA421	NA
GCA_002498375.1	d__Archaea	p__Halobacteriota	c__Methanomicrobia	o__Methanomicrobiales	f__Methanocorpusculaceae	g__Methanocorpusculum	s__Methanocorpusculum sp002498375	Methanocorpusculum sp. UBA424	NA
GCA_002498385.1	d__Archaea	p__Methanobacteriota	c__Methanobacteria	o__Methanobacteriales	f__Methanobacteriaceae	g__Methanobacterium_C	s__Methanobacterium_C sp002498385	Methanobacterium sp. UBA410	NA
GCA_002498425.1	d__Archaea	p__Thermoplasmatota	c__Thermoplasmata	o__Methanomassiliicoccales	f__Methanomethylophilaceae	g__VadinCA11	s__VadinCA11 sp002498365	Methanomassiliicoccaceae archaeon UBA317	NA
GCA_002498445.1	d__Archaea	p__Methanobacteriota	c__Methanobacteria	o__Methanobacteriales	f__Methanobacteriaceae	g__Methanobrevibacter_A	s__Methanobrevibacter_A sp900320515	Methanobrevibacter sp. UBA212	NA
GCA_002498455.1	d__Archaea	p__Thermoplasmatota	c__Poseidoniia	o__Poseidoniales	f__Thalassarchaeaceae	g__MGIIb-P	s__MGIIb-P sp002498455	Euryarchaeota archaeon UBA602	NA
GCA_002498485.1	d__Archaea	p__Methanobacteriota	c__Methanobacteria	o__Methanobacteriales	f__Methanobacteriaceae	g__Methanobacterium_C	s__Methanobacterium_C sp002498385	Methanobacterium sp. UBA302	NA
GCA_002498505.1	d__Archaea	p__Halobacteriota	c__Methanosarcinia	o__Methanotrichales	f__Methanotrichaceae	g__Methanothrix_A	s__Methanothrix_A sp001602645	Methanothrix harundinacea	NA
GCA_002498525.1	d__Archaea	p__Thermoplasmatota	c__Poseidoniia	o__Poseidoniales	f__Thalassarchaeaceae	g__MGIIb-O1	s__MGIIb-O1 sp002498525	Euryarchaeota archaeon UBA58	NA
GCA_002498535.1	d__Archaea	p__Thermoplasmatota	c__Poseidoniia	o__Poseidoniales	f__Thalassarchaeaceae	g__MGIIb-P	s__MGIIb-P sp002724815	Euryarchaeota archaeon UBA221	NA
GCA_002498545.1	d__Archaea	p__Thermoplasmatota	c__Thermoplasmata	o__Methanomassiliicoccales	f__Methanomethylophilaceae	g__UBA71	s__UBA71 sp002506425	Methanomassiliicoccaceae archaeon UBA271	NA
GCA_002498585.1	d__Archaea	p__Thermoplasmatota	c__Poseidoniia	o__Poseidoniales	f__Thalassarchaeaceae	g__MGIIb-O5	s__MGIIb-O5 sp002501805	Euryarchaeota archaeon UBA465	NA
GCA_002498605.1	d__Archaea	p__Thermoplasmatota	c__Thermoplasmata	o__Methanomassiliicoccales	f__Methanomethylophilaceae	g__VadinCA11	s__VadinCA11 sp002498605	Methanomassiliicoccaceae archaeon UBA404	NA
GCA_002498625.1	d__Archaea	p__Thermoplasmatota	c__Poseidoniia	o__Poseidoniales	f__Thalassarchaeaceae	g__MGIIb-O3	s__MGIIb-O3 sp002506755	Euryarchaeota archaeon UBA464	NA
GCA_002498635.1	d__Archaea	p__Micrarchaeota	c__Micrarchaeia	o__Micrarchaeales	f__Micrarchaeaceae	g__Micrarchaeum_A	s__Micrarchaeum_A acidiphilum_A	Candidatus Micrarchaeota archaeon UBA514	NA
GCA_002498665.1	d__Archaea	p__Thermoplasmatota	c__Thermoplasmata	o__Thermoplasmatales	f__Thermoplasmataceae	g__UBA447	s__UBA447 sp002503205	Thermoplasmatales archaeon UBA513	NA
GCA_002498685.1	d__Archaea	p__Nanoarchaeota	c__Nanoarchaeia	o__Parvarchaeales	f__Parvarchaeaceae	g__Parvarchaeum	s__Parvarchaeum acidophilus	Candidatus Parvarchaeota archaeon UBA515	NA
GCA_002498705.1	d__Archaea	p__Halobacteriota	c__Methanomicrobia	o__Methanomicrobiales	f__Methanocorpusculaceae	g__Methanocorpusculum	s__Methanocorpusculum sp002498375	Methanocorpusculum sp. UBA362	NA
GCA_002498725.1	d__Archaea	p__Thermoplasmatota	c__Poseidoniia	o__Poseidoniales	f__Thalassarchaeaceae	g__MGIIb-O1	s__MGIIb-O1 sp002498725	Euryarchaeota archaeon UBA23	NA
GCA_002498745.1	d__Archaea	p__Halobacteriota	c__Methanosarcinia	o__Methanotrichales	f__Methanotrichaceae	g__Methanothrix	s__Methanothrix sp011620785	Methanosaeta sp. UBA533	NA
GCA_002498765.1	d__Archaea	p__Thermoplasmatota	c__Thermoplasmata	o__Methanomassiliicoccales	f__Methanomethylophilaceae	g__RumEn-M2	s__RumEn-M2 sp001421175	Methanomassiliicoccaceae archaeon UBA343	NA
GCA_002498785.1	d__Archaea	p__Thermoplasmatota	c__Thermoplasmata	o__Methanomassiliicoccales	f__Methanomethylophilaceae	g__RumEn-M2	s__RumEn-M2 sp001421175	Methanomassiliicoccaceae archaeon UBA400	NA
GCA_002498805.1	d__Archaea	p__Thermoplasmatota	c__Thermoplasmata	o__Methanomassiliicoccales	f__Methanomethylophilaceae	g__VadinCA11	s__VadinCA11 sp002498365	Methanomassiliicoccaceae archaeon UBA399	NA
GCA_002498825.1	d__Archaea	p__Halobacteriota	c__Methanomicrobia	o__Methanomicrobiales	f__Methanoregulaceae	g__Methanolinea_A	s__Methanolinea_A sp002506105	Methanolinea sp. UBA437	NA
GCA_002498845.1	d__Archaea	p__Thermoplasmatota	c__Thermoplasmata	o__Thermoplasmatales	f__Thermoplasmataceae	g__UBA509	s__UBA509 sp002498845	Thermoplasmatales archaeon UBA509	NA
GCA_002498855.1	d__Archaea	p__Thermoplasmatota	c__Thermoplasmata	o__Thermoplasmatales	f__Thermoplasmataceae	g__Cuniculiplasma	s__Cuniculiplasma divulgatum	Thermoplasmatales archaeon UBA508	NA
GCA_002498865.1	d__Archaea	p__Thermoplasmatota	c__Thermoplasmata	o__Thermoplasmatales	f__Thermoplasmataceae	g__UBA509	s__UBA509 sp002498845	Thermoplasmatales archaeon UBA568	NA
GCA_002498905.1	d__Archaea	p__Methanobacteriota	c__Methanobacteria	o__Methanobacteriales	f__Methanobacteriaceae	g__Methanobacterium_A	s__Methanobacterium_A sp002494495	Methanobacterium sp. UBA384	NA
GCA_002498925.1	d__Archaea	p__Thermoplasmatota	c__Poseidoniia	o__Poseidoniales	f__Thalassarchaeaceae	g__MGIIb-O5	s__MGIIb-O5 sp002498925	Euryarchaeota archaeon UBA173	NA
GCA_002498935.1	d__Archaea	p__Thermoplasmatota	c__Poseidoniia	o__Poseidoniales	f__Thalassarchaeaceae	g__MGIIb-N1	s__MGIIb-N1 sp002499585	Euryarchaeota archaeon UBA619	NA
GCA_002498945.1	d__Archaea	p__Thermoplasmatota	c__Poseidoniia	o__Poseidoniales	f__Poseidoniaceae	g__Poseidonia	s__Poseidonia alphae	Euryarchaeota archaeon UBA37	NA
GCA_002498985.1	d__Archaea	p__Thermoplasmatota	c__Poseidoniia	o__Poseidoniales	f__Thalassarchaeaceae	g__MGIIb-O2	s__MGIIb-O2 sp002498985	Euryarchaeota archaeon UBA257	NA
GCA_002499005.1	d__Archaea	p__Thermoproteota	c__Nitrososphaeria	o__Conexivisphaerales	f__UBA164	g__UBA164	s__UBA164 sp002499005	Thaumarchaeota archaeon UBA164	NA
GCA_002499015.1	d__Archaea	p__Thermoplasmatota	c__Poseidoniia	o__Poseidoniales	f__Poseidoniaceae	g__MGIIa-L1	s__MGIIa-L1 sp002499015	Euryarchaeota archaeon UBA242	NA
GCA_002499025.1	d__Archaea	p__Halobacteriota	c__Methanomicrobia	o__Methanomicrobiales	f__Methanoregulaceae	g__Methanoregula	s__Methanoregula sp002502245	Methanoregula sp. UBA143	NA
GCA_002499035.1	d__Archaea	p__Methanobacteriota	c__Methanobacteria	o__Methanobacteriales	f__Methanobacteriaceae	g__Methanobacterium_C	s__Methanobacterium_C sp002498385	Methanobacterium sp. UBA357	NA
GCA_002499085.1	d__Archaea	p__Thermoplasmatota	c__Thermoplasmata	o__SG8-5	f__SG8-5	g__UBA147	s__UBA147 sp002499085	Methanomassiliicoccales archaeon UBA280	NA
GCA_002499095.1	d__Archaea	p__Micrarchaeota	c__Micrarchaeia	o__Micrarchaeales	f__Micrarchaeaceae	g__Micrarchaeum_A	s__Micrarchaeum_A acidiphilum_A	Candidatus Micrarchaeota archaeon UBA524	NA
GCA_002499105.1	d__Archaea	p__Thermoplasmatota	c__Thermoplasmata	o__Thermoplasmatales	f__Thermoplasmataceae	g__GCA-000496135	s__GCA-000496135 sp000496135	Thermoplasmatales archaeon UBA270	NA
GCA_002499145.1	d__Archaea	p__Methanobacteriota	c__Methanobacteria	o__Methanobacteriales	f__Methanobacteriaceae	g__Methanobacterium_A	s__Methanobacterium_A sp002494495	Methanobacterium sp. UBA379	NA
GCA_002499165.1	d__Archaea	p__Halobacteriota	c__Methanomicrobia	o__Methanomicrobiales	f__Methanoculleaceae	g__Methanoculleus	s__Methanoculleus bourgensis	Methanoculleus sp. UBA326	NA
GCA_002499185.1	d__Archaea	p__Nanoarchaeota	c__Nanoarchaeia	o__Pacearchaeales	f__UBA284	g__UBA284	s__UBA284 sp002499185	Candidatus Pacearchaeota archaeon UBA284	NA
GCA_002499195.1	d__Archaea	p__Thermoplasmatota	c__Poseidoniia	o__Poseidoniales	f__Poseidoniaceae	g__MGIIa-L2	s__MGIIa-L2 sp002499195	Euryarchaeota archaeon UBA443	NA
GCA_002499205.1	d__Archaea	p__Thermoplasmatota	c__Poseidoniia	o__Poseidoniales	f__Poseidoniaceae	g__Poseidonia	s__Poseidonia sp002714305	Euryarchaeota archaeon UBA442	NA
GCA_002499245.1	d__Archaea	p__Thermoplasmatota	c__Thermoplasmata	o__Thermoplasmatales	f__Thermoplasmataceae	g__UBA509	s__UBA509 sp002498845	Thermoplasmatales archaeon UBA517	NA
GCA_002499265.1	d__Archaea	p__Thermoplasmatota	c__Poseidoniia	o__Poseidoniales	f__Thalassarchaeaceae	g__MGIIb-O5	s__MGIIb-O5 sp002501605	Euryarchaeota archaeon UBA601	NA
GCA_002499275.1	d__Archaea	p__Thermoplasmatota	c__Thermoplasmata	o__Thermoplasmatales	f__Thermoplasmataceae	g__Cuniculiplasma	s__Cuniculiplasma divulgatum	Thermoplasmatales archaeon UBA516	NA
GCA_002499285.1	d__Archaea	p__Thermoplasmatota	c__Poseidoniia	o__Poseidoniales	f__Thalassarchaeaceae	g__Thalassarchaeum	s__Thalassarchaeum betae_A	Euryarchaeota archaeon UBA172	NA
GCA_002499325.1	d__Archaea	p__Thermoplasmatota	c__Poseidoniia	o__Poseidoniales	f__Thalassarchaeaceae	g__MGIIb-O5	s__MGIIb-O5 sp002499325	Euryarchaeota archaeon UBA538	NA
GCA_002499345.1	d__Archaea	p__Thermoplasmatota	c__Poseidoniia	o__Poseidoniales	f__Thalassarchaeaceae	g__MGIIb-O5	s__MGIIb-O5 sp002499345	Euryarchaeota archaeon UBA170	NA
GCA_002499365.1	d__Archaea	p__Thermoplasmatota	c__Poseidoniia	o__Poseidoniales	f__Thalassarchaeaceae	g__MGIIb-O1	s__MGIIb-O1 sp002497895	Euryarchaeota archaeon UBA29	NA
GCA_002499375.1	d__Archaea	p__Micrarchaeota	c__Micrarchaeia	o__Anstonellales	f__CG1-02-47-40	g__CG1-02-47-40	s__CG1-02-47-40 sp001871475	Candidatus Micrarchaeota archaeon UBA96	NA
GCA_002499405.1	d__Archaea	p__Micrarchaeota	c__Micrarchaeia	o__Norongarragalinales	f__Norongarragalinaceae	g__UBA95	s__UBA95 sp002499405	Candidatus Micrarchaeota archaeon UBA95	NA
GCA_002499425.1	d__Archaea	p__Thermoplasmatota	c__Poseidoniia	o__Poseidoniales	f__Thalassarchaeaceae	g__MGIIb-O1	s__MGIIb-O1 sp8684u	Euryarchaeota archaeon UBA34	NA
GCA_002499445.1	d__Archaea	p__Halobacteriota	c__Methanosarcinia	o__Methanosarcinales	f__Methanosarcinaceae	g__Methanosarcina	s__Methanosarcina sp002499445	Methanosarcina sp. UBA293	NA
GCA_002499455.1	d__Archaea	p__Halobacteriota	c__Methanomicrobia	o__Methanomicrobiales	f__Methanoculleaceae	g__Methanoculleus	s__Methanoculleus sp002499455	Methanoculleus sp. UBA77	NA
GCA_002499485.1	d__Archaea	p__Thermoplasmatota	c__Poseidoniia	o__Poseidoniales	f__Thalassarchaeaceae	g__Thalassarchaeum	s__Thalassarchaeum sp002501885	Euryarchaeota archaeon UBA178	NA
GCA_002499505.1	d__Archaea	p__Iainarchaeota	c__Iainarchaeia	o__Iainarchaeales	f__Iainarchaeaceae	g__UBA493	s__UBA493 sp002687735	Candidatus Diapherotrites archaeon UBA493	NA
GCA_002499525.1	d__Archaea	p__Thermoproteota	c__Nitrososphaeria	o__Nitrososphaerales	f__Nitrosopumilaceae	g__Nitrosotenuis	s__Nitrosotenuis sp002499525	Nitrosopumilales archaeon UBA218	NA
GCA_002499545.1	d__Archaea	p__Thermoplasmatota	c__Poseidoniia	o__Poseidoniales	f__Poseidoniaceae	g__MGIIa-L1	s__MGIIa-L1 sp002499545	Euryarchaeota archaeon UBA88	NA
GCA_002499555.1	d__Archaea	p__Thermoplasmatota	c__Poseidoniia	o__Poseidoniales	f__Thalassarchaeaceae	g__MGIIb-O5	s__MGIIb-O5 sp002499865	Euryarchaeota archaeon UBA494	NA
GCA_002499585.1	d__Archaea	p__Thermoplasmatota	c__Poseidoniia	o__Poseidoniales	f__Thalassarchaeaceae	g__MGIIb-N1	s__MGIIb-N1 sp002499585	Euryarchaeota archaeon UBA552	NA
GCA_002499595.1	d__Archaea	p__Thermoplasmatota	c__Poseidoniia	o__Poseidoniales	f__Thalassarchaeaceae	g__Thalassarchaeum	s__Thalassarchaeum sp002503055	Euryarchaeota archaeon UBA499	NA
GCA_002499625.1	d__Archaea	p__Thermoplasmatota	c__Thermoplasmata	o__Thermoplasmatales	f__Thermoplasmataceae	g__UBA509	s__UBA509 sp002498845	Thermoplasmatales archaeon UBA504	NA
GCA_002499645.1	d__Archaea	p__Thermoplasmatota	c__Poseidoniia	o__Poseidoniales	f__Thalassarchaeaceae	g__MGIIb-O5	s__MGIIb-O5 sp002498925	Euryarchaeota archaeon UBA554	NA
GCA_002499655.1	d__Archaea	p__Nanoarchaeota	c__Nanoarchaeia	o__Parvarchaeales	f__Parvarchaeaceae	g__Parvarchaeum	s__Parvarchaeum acidophilus	Candidatus Parvarchaeota archaeon UBA506	NA
GCA_002499685.1	d__Archaea	p__Thermoplasmatota	c__Thermoplasmata	o__Thermoplasmatales	f__Thermoplasmataceae	g__UBA447	s__UBA447 sp002503205	Thermoplasmatales archaeon UBA507	NA
GCA_002499705.1	d__Archaea	p__Thermoplasmatota	c__Poseidoniia	o__Poseidoniales	f__Poseidoniaceae	g__MGIIa-L1	s__MGIIa-L1 sp002499705	Euryarchaeota archaeon UBA91	NA
GCA_002499715.1	d__Archaea	p__Thermoplasmatota	c__Poseidoniia	o__Poseidoniales	f__Thalassarchaeaceae	g__MGIIb-O5	s__MGIIb-O5 sp002498925	Euryarchaeota archaeon UBA3	NA
GCA_002499745.1	d__Archaea	p__Thermoplasmatota	c__Poseidoniia	o__Poseidoniales	f__Thalassarchaeaceae	g__MGIIb-N1	s__MGIIb-N1 sp002499585	Euryarchaeota archaeon UBA69	NA
GCA_002499755.1	d__Archaea	p__Halobacteriota	c__Methanomicrobia	o__Methanomicrobiales	f__Methanoculleaceae	g__Methanoculleus	s__Methanoculleus sp002508705	Methanoculleus sp. UBA291	NA
GCA_002499785.1	d__Archaea	p__Thermoplasmatota	c__Poseidoniia	o__Poseidoniales	f__Thalassarchaeaceae	g__MGIIb-O2	s__MGIIb-O2 sp002499785	Euryarchaeota archaeon UBA99	NA
GCA_002499795.1	d__Archaea	p__Thermoplasmatota	c__Poseidoniia	o__Poseidoniales	f__Thalassarchaeaceae	g__MGIIb-O2	s__MGIIb-O2 sp002504905	Euryarchaeota archaeon UBA607	NA
GCA_002499825.1	d__Archaea	p__Halobacteriota	c__Methanomicrobia	o__Methanomicrobiales	f__Methanoregulaceae	g__Methanolinea_A	s__Methanolinea_A sp002506105	Methanolinea sp. UBA245	NA
GCA_002499835.1	d__Archaea	p__Thermoplasmatota	c__Poseidoniia	o__Poseidoniales	f__Poseidoniaceae	g__Poseidonia	s__Poseidonia sp002714305	Euryarchaeota archaeon UBA609	NA
GCA_002499865.1	d__Archaea	p__Thermoplasmatota	c__Poseidoniia	o__Poseidoniales	f__Thalassarchaeaceae	g__MGIIb-O5	s__MGIIb-O5 sp002499865	Euryarchaeota archaeon UBA121	NA
GCA_002499885.1	d__Archaea	p__Thermoplasmatota	c__Poseidoniia	o__Poseidoniales	f__Poseidoniaceae	g__Poseidonia	s__Poseidonia sp002714305	Euryarchaeota archaeon UBA122	NA
GCA_002499905.1	d__Archaea	p__Halobacteriota	c__Methanomicrobia	o__Methanomicrobiales	f__Methanoregulaceae	g__UBA9949	s__UBA9949 sp002499905	Methanolinea sp. UBA277	NA
GCA_002501605.1	d__Archaea	p__Thermoplasmatota	c__Poseidoniia	o__Poseidoniales	f__Thalassarchaeaceae	g__MGIIb-O5	s__MGIIb-O5 sp002501605	Euryarchaeota archaeon UBA28	NA
GCA_002501615.1	d__Archaea	p__Thermoplasmatota	c__Poseidoniia	o__Poseidoniales	f__Thalassarchaeaceae	g__MGIIb-P	s__MGIIb-P sp002498455	Euryarchaeota archaeon UBA27	NA
GCA_002501645.1	d__Archaea	p__Halobacteriota	c__Methanosarcinia	o__Methanosarcinales	f__Methanosarcinaceae	g__Methanosarcina	s__Methanosarcina sp002499445	Methanosarcina sp. UBA361	NA
GCA_002501655.1	d__Archaea	p__Halobacteriota	c__Methanomicrobia	o__Methanomicrobiales	f__Methanoculleaceae	g__Methanoculleus	s__Methanoculleus sp002501655	Methanoculleus sp. UBA303	NA
GCA_002501685.1	d__Archaea	p__Thermoplasmatota	c__Poseidoniia	o__Poseidoniales	f__Thalassarchaeaceae	g__Thalassarchaeum	s__Thalassarchaeum sp002714745	Euryarchaeota archaeon UBA542	NA
GCA_002501695.1	d__Archaea	p__Halobacteriota	c__Methanosarcinia	o__Methanosarcinales	f__Methanosarcinaceae	g__Methanolobus	s__Methanolobus sp002501695	Methanolobus sp. UBA474	NA
GCA_002501725.1	d__Archaea	p__Thermoplasmatota	c__Thermoplasmata	o__Thermoplasmatales	f__Thermoplasmataceae	g__UBA447	s__UBA447 sp002503205	Thermoplasmatales archaeon UBA522	NA
GCA_002501735.1	d__Archaea	p__Thermoplasmatota	c__Thermoplasmata	o__Thermoplasmatales	f__Thermoplasmataceae	g__UBA509	s__UBA509 sp002498845	Thermoplasmatales archaeon UBA521	NA
GCA_002501765.1	d__Archaea	p__Halobacteriota	c__Methanosarcinia	o__Methanotrichales	f__Methanotrichaceae	g__UBA204	s__UBA204 sp002501765	Methanosaeta sp. UBA204	NA
GCA_002501775.1	d__Archaea	p__Micrarchaeota	c__Micrarchaeia	o__Micrarchaeales	f__Micrarchaeaceae	g__Micrarchaeum	s__Micrarchaeum acidiphilum	Candidatus Micrarchaeota archaeon UBA523	NA
GCA_002501805.1	d__Archaea	p__Thermoplasmatota	c__Poseidoniia	o__Poseidoniales	f__Thalassarchaeaceae	g__MGIIb-O5	s__MGIIb-O5 sp002501805	Euryarchaeota archaeon UBA463	NA
GCA_002501815.1	d__Archaea	p__Thermoplasmatota	c__Poseidoniia	o__Poseidoniales	f__Thalassarchaeaceae	g__MGIIb-N1	s__MGIIb-N1 sp002505695	Euryarchaeota archaeon UBA14	NA
GCA_002501845.1	d__Archaea	p__Thermoproteota	c__Nitrososphaeria	o__Nitrososphaerales	f__Nitrososphaeraceae	g__Nitrososphaera	s__Nitrososphaera sp002501845	Nitrososphaera sp. UBA217	NA
GCA_002501855.1	d__Archaea	p__Thermoproteota	c__Nitrososphaeria	o__Nitrososphaerales	f__Nitrososphaeraceae	g__Nitrosopolaris	s__Nitrosopolaris nunavutensis	Candidatus Nitrosopolaris nunavutensis	NA
GCA_002501885.1	d__Archaea	p__Thermoplasmatota	c__Poseidoniia	o__Poseidoniales	f__Thalassarchaeaceae	g__Thalassarchaeum	s__Thalassarchaeum sp002501885	Euryarchaeota archaeon UBA220	NA
GCA_002501895.1	d__Archaea	p__Thermoplasmatota	c__Poseidoniia	o__MGIII	f__CG-Epi1	g__CG-Epi1	s__CG-Epi1 sp002506485	Euryarchaeota archaeon UBA491	NA
GCA_002501915.1	d__Archaea	p__Thermoplasmatota	c__Poseidoniia	o__Poseidoniales	f__Thalassarchaeaceae	g__MGIIb-N1	s__MGIIb-N1 sp002499585	Euryarchaeota archaeon UBA51	NA
GCA_002501935.1	d__Archaea	p__Thermoproteota	c__Nitrososphaeria	o__Nitrososphaerales	f__Nitrososphaeraceae	g__Nitrosopolaris	s__Nitrosopolaris nunavutensis	Candidatus Nitrosopolaris nunavutensis	NA
GCA_002501975.1	d__Archaea	p__Thermoplasmatota	c__Poseidoniia	o__Poseidoniales	f__Thalassarchaeaceae	g__MGIIb-O1	s__MGIIb-O1 sp002457555	Euryarchaeota archaeon UBA31	NA
GCA_002501985.1	d__Archaea	p__Undinarchaeota	c__Undinarchaeia	o__Undinarchaeales	f__Undinarchaeaceae	g__Undinarchaeum	s__Undinarchaeum sp002687935	archaeon UBA140	NA
GCA_002502005.1	d__Archaea	p__Thermoplasmatota	c__Thermoplasmata	o__Methanomassiliicoccales	f__Methanomassiliicoccaceae	g__DTU008	s__DTU008 sp002504525	Methanomassiliicoccus sp. UBA321	NA
GCA_002502045.1	d__Archaea	p__Nanoarchaeota	c__Nanoarchaeia	o__Parvarchaeales	f__Parvarchaeaceae	g__Parvarchaeum	s__Parvarchaeum acidiphilum	Candidatus Parvarchaeota archaeon UBA573	NA
GCA_002502055.1	d__Archaea	p__Thermoplasmatota	c__Poseidoniia	o__Poseidoniales	f__Thalassarchaeaceae	g__MGIIb-O1	s__MGIIb-O1 sp002498725	Euryarchaeota archaeon UBA199	NA
GCA_002502085.1	d__Archaea	p__Thermoplasmatota	c__Poseidoniia	o__Poseidoniales	f__Thalassarchaeaceae	g__MGIIb-O5	s__MGIIb-O5 sp002499325	Euryarchaeota archaeon UBA502	NA
GCA_002502095.1	d__Archaea	p__Thermoplasmatota	c__Poseidoniia	o__Poseidoniales	f__Thalassarchaeaceae	g__MGIIb-O5	s__MGIIb-O5 sp002502095	Euryarchaeota archaeon UBA62	NA
GCA_002502125.1	d__Archaea	p__Thermoplasmatota	c__Poseidoniia	o__Poseidoniales	f__Thalassarchaeaceae	g__MGIIb-N1	s__MGIIb-N1 sp002499585	Euryarchaeota archaeon UBA127	NA
GCA_002502135.1	d__Archaea	p__Undinarchaeota	c__Undinarchaeia	o__Undinarchaeales	f__UBA543	g__UBA543	s__UBA543 sp002502135	archaeon UBA543	NA
GCA_002502165.1	d__Archaea	p__Thermoplasmatota	c__Thermoplasmata	o__Methanomassiliicoccales	f__Methanomethylophilaceae	g__VadinCA11	s__VadinCA11 sp002498365	Methanomassiliicoccaceae archaeon UBA366	NA
GCA_002502175.1	d__Archaea	p__Thermoplasmatota	c__Poseidoniia	o__Poseidoniales	f__Thalassarchaeaceae	g__MGIIb-O1	s__MGIIb-O1 sp002502175	Euryarchaeota archaeon UBA19	NA
GCA_002502205.1	d__Archaea	p__Thermoplasmatota	c__Poseidoniia	o__Poseidoniales	f__Thalassarchaeaceae	g__MGIIb-O5	s__MGIIb-O5 sp002499865	Euryarchaeota archaeon UBA608	NA
GCA_002502215.1	d__Archaea	p__Thermoplasmatota	c__Poseidoniia	o__Poseidoniales	f__Poseidoniaceae	g__MGIIa-L2	s__MGIIa-L2 sp002502215	Euryarchaeota archaeon UBA124	NA
GCA_002502245.1	d__Archaea	p__Halobacteriota	c__Methanomicrobia	o__Methanomicrobiales	f__Methanoregulaceae	g__Methanoregula	s__Methanoregula sp002502245	Methanoregula sp. UBA154	NA
GCA_002502255.1	d__Archaea	p__Thermoplasmatota	c__Poseidoniia	o__Poseidoniales	f__Thalassarchaeaceae	g__MGIIb-O5	s__MGIIb-O5 sp002498925	Euryarchaeota archaeon UBA215	NA
GCA_002502285.1	d__Archaea	p__Thermoplasmatota	c__Poseidoniia	o__Poseidoniales	f__Thalassarchaeaceae	g__MGIIb-O1	s__MGIIb-O1 sp002502175	Euryarchaeota archaeon UBA26	NA
GCA_002502295.1	d__Archaea	p__Thermoplasmatota	c__Poseidoniia	o__Poseidoniales	f__Poseidoniaceae	g__Poseidonia	s__Poseidonia sp002502295	Euryarchaeota archaeon UBA561	NA
GCA_002502325.1	d__Archaea	p__Thermoplasmatota	c__Poseidoniia	o__Poseidoniales	f__Thalassarchaeaceae	g__MGIIb-O1	s__MGIIb-O1 sp002502175	Euryarchaeota archaeon UBA597	NA
GCA_002502335.1	d__Archaea	p__Thermoplasmatota	c__Poseidoniia	o__Poseidoniales	f__Thalassarchaeaceae	g__MGIIb-P	s__MGIIb-P sp002498455	Euryarchaeota archaeon UBA530	NA
GCA_002502365.1	d__Archaea	p__Thermoplasmatota	c__Poseidoniia	o__Poseidoniales	f__Thalassarchaeaceae	g__MGIIb-O1	s__MGIIb-O1 sp002502365	Euryarchaeota archaeon UBA106	NA
GCA_002502385.1	d__Archaea	p__Thermoplasmatota	c__Poseidoniia	o__Poseidoniales	f__Thalassarchaeaceae	g__MGIIb-O5	s__MGIIb-O5 sp002501805	Euryarchaeota archaeon UBA606	NA
GCA_002502405.1	d__Archaea	p__Halobacteriota	c__Methanosarcinia	o__Methanotrichales	f__Methanotrichaceae	g__Methanothrix_A	s__Methanothrix_A harundinacea_B	Methanothrix harundinacea	NA
GCA_002502415.1	d__Archaea	p__Thermoplasmatota	c__Poseidoniia	o__Poseidoniales	f__Poseidoniaceae	g__MGIIa-L1	s__MGIIa-L1 sp002729095	Euryarchaeota archaeon UBA131	NA
GCA_002502445.1	d__Archaea	p__Methanobacteriota	c__Methanobacteria	o__Methanobacteriales	f__Methanobacteriaceae	g__Methanobacterium	s__Methanobacterium subterraneum	Methanobacterium sp. UBA283	NA
GCA_002502465.1	d__Archaea	p__Thermoplasmatota	c__Thermoplasmata	o__Methanomassiliicoccales	f__Methanomethylophilaceae	g__VadinCA11	s__VadinCA11 sp002498365	Methanomassiliicoccaceae archaeon UBA296	NA
GCA_002502475.1	d__Archaea	p__Halobacteriota	c__Methanosarcinia	o__Methanotrichales	f__Methanotrichaceae	g__Methanothrix	s__Methanothrix soehngenii	Methanosaeta sp. UBA70	NA
GCA_002502485.1	d__Archaea	p__Thermoplasmatota	c__Poseidoniia	o__Poseidoniales	f__Poseidoniaceae	g__MGIIa-L1	s__MGIIa-L1 sp002702945	Euryarchaeota archaeon UBA123	NA
GCA_002502525.1	d__Archaea	p__Nanoarchaeota	c__Nanoarchaeia	o__Parvarchaeales	f__Parvarchaeaceae	g__Parvarchaeum	s__Parvarchaeum acidophilus	Candidatus Parvarchaeota archaeon UBA575	NA
GCA_002502545.1	d__Archaea	p__Thermoplasmatota	c__Thermoplasmata	o__Methanomassiliicoccales	f__Methanomethylophilaceae	g__RumEn-M2	s__RumEn-M2 sp001421175	Methanomassiliicoccaceae archaeon UBA415	NA
GCA_002502555.1	d__Archaea	p__Thermoplasmatota	c__Poseidoniia	o__Poseidoniales	f__Poseidoniaceae	g__Poseidonia	s__Poseidonia sp002726495	Euryarchaeota archaeon UBA214	NA
GCA_002502565.1	d__Archaea	p__Thermoplasmatota	c__Poseidoniia	o__Poseidoniales	f__Thalassarchaeaceae	g__MGIIb-N1	s__MGIIb-N1 sp002499585	Euryarchaeota archaeon UBA20	NA
GCA_002502605.1	d__Archaea	p__Thermoplasmatota	c__Poseidoniia	o__Poseidoniales	f__Poseidoniaceae	g__MGIIa-L1	s__MGIIa-L1 sp002502605	Euryarchaeota archaeon UBA258	NA
GCA_002502625.1	d__Archaea	p__Thermoplasmatota	c__Poseidoniia	o__Poseidoniales	f__Thalassarchaeaceae	g__MGIIb-N2	s__MGIIb-N2 sp002502625	Euryarchaeota archaeon UBA125	NA
GCA_002502635.1	d__Archaea	p__Methanobacteriota	c__Methanobacteria	o__Methanobacteriales	f__Methanobacteriaceae	g__Methanobacterium_C	s__Methanobacterium_C sp002498385	Methanobacterium sp. UBA310	NA
GCA_002502655.1	d__Archaea	p__Thermoplasmatota	c__Poseidoniia	o__Poseidoniales	f__Thalassarchaeaceae	g__MGIIb-O2	s__MGIIb-O2 sp002504905	Euryarchaeota archaeon UBA610	NA
GCA_002502685.1	d__Archaea	p__Thermoplasmatota	c__E2	o__UBA202	f__UBA202	g__UBA202	s__UBA202 sp002502685	Euryarchaeota archaeon UBA202	NA
GCA_002502705.1	d__Archaea	p__Thermoplasmatota	c__Thermoplasmata	o__Thermoplasmatales	f__Thermoplasmataceae	g__UBA582	s__UBA582 sp002502705	Thermoplasmatales archaeon UBA582	NA
GCA_002502725.1	d__Archaea	p__Micrarchaeota	c__Micrarchaeia	o__Micrarchaeales	f__Micrarchaeaceae	g__Micrarchaeum	s__Micrarchaeum acidiphilum	Candidatus Micrarchaeota archaeon UBA581	NA
GCA_002502735.1	d__Archaea	p__Halobacteriota	c__Methanomicrobia	o__Methanomicrobiales	f__Methanoregulaceae	g__Methanoregula	s__Methanoregula sp002502735	Methanoregula sp. UBA64	NA
GCA_002502765.1	d__Archaea	p__Thermoplasmatota	c__Thermoplasmata	o__Methanomassiliicoccales	f__Methanomethylophilaceae	g__VadinCA11	s__VadinCA11 sp002505345	Methanomassiliicoccaceae archaeon UBA358	NA
GCA_002502785.1	d__Archaea	p__Halobacteriota	c__Methanosarcinia	o__Methanotrichales	f__Methanotrichaceae	g__Methanothrix_A	s__Methanothrix_A harundinacea_A	Methanothrix harundinacea	NA
GCA_002502805.1	d__Archaea	p__Halobacteriota	c__Methanosarcinia	o__Methanosarcinales	f__Methanosarcinaceae	g__Methanosarcina	s__Methanosarcina sp002499445	Methanosarcina sp. UBA323	NA
GCA_002502815.1	d__Archaea	p__Halobacteriota	c__Methanomicrobia	o__Methanomicrobiales	f__Methanoculleaceae	g__UBA207	s__UBA207 sp002503135	Methanomicrobiaceae archaeon UBA2	NA
GCA_002502845.1	d__Archaea	p__Methanobacteriota	c__Methanobacteria	o__Methanobacteriales	f__Methanobacteriaceae	g__Methanobacterium_A	s__Methanobacterium_A sp002494495	Methanobacterium sp. UBA324	NA
GCA_002502855.1	d__Archaea	p__Methanobacteriota	c__Methanobacteria	o__Methanobacteriales	f__Methanobacteriaceae	g__Methanobacterium_A	s__Methanobacterium_A sp002502855	Methanobacterium sp. UBA279	NA
GCA_002502885.1	d__Archaea	p__Thermoplasmatota	c__Thermoplasmata	o__Thermoplasmatales	f__Thermoplasmataceae	g__UBA509	s__UBA509 sp002498845	Thermoplasmatales archaeon UBA512	NA
GCA_002502895.1	d__Archaea	p__Thermoplasmatota	c__Poseidoniia	o__Poseidoniales	f__Thalassarchaeaceae	g__MGIIb-O5	s__MGIIb-O5 sp002505775	Euryarchaeota archaeon UBA137	NA
GCA_002502925.1	d__Archaea	p__Thermoplasmatota	c__Thermoplasmata	o__Methanomassiliicoccales	f__Methanomethylophilaceae	g__VadinCA11	s__VadinCA11 sp002498365	Methanomassiliicoccaceae archaeon UBA414	NA
GCA_002502935.1	d__Archaea	p__Halobacteriota	c__Methanomicrobia	o__Methanomicrobiales	f__Methanoculleaceae	g__Methanoculleus	s__Methanoculleus bourgensis	Methanoculleus sp. UBA413	NA
GCA_002502965.1	d__Archaea	p__Thermoplasmatota	c__Thermoplasmata	o__Methanomassiliicoccales	f__Methanomethylophilaceae	g__RumEn-M2	s__RumEn-M2 sp002502965	Methanomassiliicoccaceae archaeon UBA381	NA
GCA_002502975.1	d__Archaea	p__Halobacteriota	c__Methanomicrobia	o__Methanomicrobiales	f__Methanoregulaceae	g__Methanolinea_A	s__Methanolinea_A sp002506105	Methanolinea sp. UBA451	NA
GCA_002503005.1	d__Archaea	p__Methanobacteriota	c__Methanobacteria	o__Methanobacteriales	f__Methanobacteriaceae	g__Methanobacterium	s__Methanobacterium sp002496805	Methanobacterium sp. UBA380	NA
GCA_002503015.1	d__Archaea	p__Thermoplasmatota	c__Poseidoniia	o__Poseidoniales	f__Poseidoniaceae	g__MGIIa-L2	s__MGIIa-L2 sp002499195	Euryarchaeota archaeon UBA461	NA
GCA_002503045.1	d__Archaea	p__Thermoplasmatota	c__Poseidoniia	o__Poseidoniales	f__Thalassarchaeaceae	g__MGIIb-N2	s__MGIIb-N2 sp002503045	Euryarchaeota archaeon UBA39	NA
GCA_002503055.1	d__Archaea	p__Thermoplasmatota	c__Poseidoniia	o__Poseidoniales	f__Thalassarchaeaceae	g__Thalassarchaeum	s__Thalassarchaeum sp002503055	Euryarchaeota archaeon UBA86	NA
GCA_002503085.1	d__Archaea	p__Halobacteriota	c__Methanosarcinia	o__Methanotrichales	f__Methanotrichaceae	g__Methanothrix_A	s__Methanothrix_A harundinacea_A	Methanothrix harundinacea	NA
GCA_002503105.1	d__Archaea	p__Halobacteriota	c__Methanomicrobia	o__Methanomicrobiales	f__Methanoculleaceae	g__UBA206	s__UBA206 sp002503105	Methanomicrobiaceae archaeon UBA206	NA
GCA_002503125.1	d__Archaea	p__Methanobacteriota	c__Methanobacteria	o__Methanobacteriales	f__Methanobacteriaceae	g__Methanobacterium_C	s__Methanobacterium_C sp002498385	Methanobacterium sp. UBA418	NA
GCA_002503135.1	d__Archaea	p__Halobacteriota	c__Methanomicrobia	o__Methanomicrobiales	f__Methanoculleaceae	g__UBA207	s__UBA207 sp002503135	Methanomicrobiaceae archaeon UBA207	NA
GCA_002503145.1	d__Archaea	p__Micrarchaeota	c__Micrarchaeia	o__Micrarchaeales	f__Micrarchaeaceae	g__Micrarchaeum_A	s__Micrarchaeum_A acidiphilum_A	Candidatus Micrarchaeota archaeon UBA267	NA
GCA_002503185.1	d__Archaea	p__Methanobacteriota	c__Methanobacteria	o__Methanobacteriales	f__Methanobacteriaceae	g__Methanobacterium_A	s__Methanobacterium_A sp002494495	Methanobacterium sp. UBA322	NA
GCA_002503205.1	d__Archaea	p__Thermoplasmatota	c__Thermoplasmata	o__Thermoplasmatales	f__Thermoplasmataceae	g__UBA447	s__UBA447 sp002503205	Thermoplasmatales archaeon UBA447	NA
GCA_002503215.1	d__Archaea	p__Nanoarchaeota	c__Nanoarchaeia	o__Parvarchaeales	f__Parvarchaeaceae	g__Parvarchaeum	s__Parvarchaeum acidophilus	Candidatus Parvarchaeota archaeon UBA446	NA
GCA_002503225.1	d__Archaea	p__Micrarchaeota	c__Micrarchaeia	o__Micrarchaeales	f__Micrarchaeaceae	g__Micrarchaeum_A	s__Micrarchaeum_A acidiphilum_A	Candidatus Micrarchaeota archaeon UBA448	NA
GCA_002503265.1	d__Archaea	p__Thermoplasmatota	c__Thermoplasmata	o__Thermoplasmatales	f__Thermoplasmataceae	g__Cuniculiplasma	s__Cuniculiplasma divulgatum	Thermoplasmatales archaeon UBA616	NA
GCA_002503285.1	d__Archaea	p__Thermoplasmatota	c__Poseidoniia	o__Poseidoniales	f__Thalassarchaeaceae	g__MGIIb-O3	s__MGIIb-O3 sp002503285	Euryarchaeota archaeon UBA557	NA
GCA_002503295.1	d__Archaea	p__Thermoplasmatota	c__Poseidoniia	o__Poseidoniales	f__Poseidoniaceae	g__MGIIa-K1	s__MGIIa-K1 sp002706615	Euryarchaeota archaeon UBA441	NA
GCA_002503305.1	d__Archaea	p__Nanoarchaeota	c__Nanoarchaeia	o__Parvarchaeales	f__Parvarchaeaceae	g__Parvarchaeum	s__Parvarchaeum acidiphilum	Candidatus Parvarchaeota archaeon UBA449	NA
GCA_002503345.1	d__Archaea	p__Methanobacteriota	c__Methanobacteria	o__Methanobacteriales	f__Methanobacteriaceae	g__Methanobacterium	s__Methanobacterium subterraneum	Methanobacterium sp. UBA479	NA
GCA_002503365.1	d__Archaea	p__Halobacteriota	c__Methanosarcinia	o__Methanosarcinales	f__Methanosarcinaceae	g__Methanomethylovorans	s__Methanomethylovorans hollandica	Methanosarcinaceae archaeon UBA282	NA
GCA_002503385.1	d__Archaea	p__Thermoplasmatota	c__Poseidoniia	o__Poseidoniales	f__Poseidoniaceae	g__MGIIa-L1	s__MGIIa-L1 sp002687075	Euryarchaeota archaeon UBA563	NA
GCA_002503395.1	d__Archaea	p__Thermoplasmatota	c__Poseidoniia	o__Poseidoniales	f__Poseidoniaceae	g__UBA60	s__UBA60 sp002503395	Euryarchaeota archaeon UBA60	NA
GCA_002503425.1	d__Archaea	p__Nanoarchaeota	c__Nanoarchaeia	o__Woesearchaeales	f__CG1-02-57-44	g__CG1-02-57-44	s__CG1-02-57-44 sp001871415	Candidatus Woesearchaeota archaeon UBA94	NA
GCA_002503445.1	d__Archaea	p__Halobacteriota	c__Methanosarcinia	o__Methanotrichales	f__Methanotrichaceae	g__Methanothrix	s__Methanothrix soehngenii	Methanosaeta sp. UBA243	NA
GCA_002503455.1	d__Archaea	p__Halobacteriota	c__Methanosarcinia	o__Methanosarcinales	f__Methanosarcinaceae	g__Methanosarcina	s__Methanosarcina sp002499445	Methanosarcina sp. UBA591	NA
GCA_002503485.1	d__Archaea	p__Thermoplasmatota	c__Poseidoniia	o__Poseidoniales	f__Thalassarchaeaceae	g__MGIIb-O5	s__MGIIb-O5 sp002498925	Euryarchaeota archaeon UBA25	NA
GCA_002503495.1	d__Archaea	p__Thermoplasmatota	c__Thermoplasmata	o__Methanomassiliicoccales	f__Methanomassiliicoccaceae	g__DTU008	s__DTU008 sp002504525	Methanomassiliicoccus sp. UBA335	NA
GCA_002503525.1	d__Archaea	p__Halobacteriota	c__Methanomicrobia	o__Methanomicrobiales	f__Methanoculleaceae	g__Methanoculleus	s__Methanoculleus marisnigri_B	Methanoculleus marisnigri	NA
GCA_002503545.1	d__Archaea	p__Thermoplasmatota	c__Thermoplasmata	o__Methanomassiliicoccales	f__Methanomethylophilaceae	g__Methanomethylophilus	s__Methanomethylophilus sp002503545	Candidatus Methanomethylophilus sp. UBA78	NA
GCA_002503565.1	d__Archaea	p__Methanobacteriota	c__Methanobacteria	o__Methanobacteriales	f__Methanobacteriaceae	g__Methanobacterium_C	s__Methanobacterium_C sp002498385	Methanobacterium sp. UBA336	NA
GCA_002503585.1	d__Archaea	p__Methanobacteriota	c__Methanobacteria	o__Methanobacteriales	f__Methanobacteriaceae	g__Methanobacterium_C	s__Methanobacterium_C sp002498385	Methanobacterium sp. UBA316	NA
GCA_002503595.1	d__Archaea	p__Halobacteriota	c__Methanosarcinia	o__Methanosarcinales	f__Methanogasteraceae	g__Methanogaster	s__Methanogaster sp002503595	Methanosarcinales archaeon UBA203	NA
GCA_002503625.1	d__Archaea	p__Thermoplasmatota	c__Poseidoniia	o__Poseidoniales	f__Thalassarchaeaceae	g__MGIIb-O2	s__MGIIb-O2 sp002504905	Euryarchaeota archaeon UBA224	NA
GCA_002503645.1	d__Archaea	p__Thermoplasmatota	c__Thermoplasmata	o__Methanomassiliicoccales	f__Methanomassiliicoccaceae	g__DTU008	s__DTU008 sp002504525	Methanomassiliicoccus sp. UBA315	NA
GCA_002503675.1	d__Archaea	p__Thermoplasmatota	c__Poseidoniia	o__Poseidoniales	f__Thalassarchaeaceae	g__MGIIb-N2	s__MGIIb-N2 sp002712285	Euryarchaeota archaeon UBA496	NA
GCA_002503705.1	d__Archaea	p__Nanoarchaeota	c__Nanoarchaeia	o__Woesearchaeales	f__UBA525	g__UBA153	s__UBA153 sp002503705	Candidatus Woesearchaeota archaeon UBA153	NA
GCA_002503725.1	d__Archaea	p__Thermoplasmatota	c__Poseidoniia	o__Poseidoniales	f__Thalassarchaeaceae	g__MGIIb-O1	s__MGIIb-O1 sp002497025	Euryarchaeota archaeon UBA193	NA
GCA_002503745.1	d__Archaea	p__Nanoarchaeota	c__Nanoarchaeia	o__Woesearchaeales	f__UBA10216	g__UBA492	s__UBA492 sp002688315	Candidatus Woesearchaeota archaeon UBA492	NA
GCA_002503755.1	d__Archaea	p__Thermoplasmatota	c__Poseidoniia	o__Poseidoniales	f__Thalassarchaeaceae	g__MGIIb-O1	s__MGIIb-O1 sp002502175	Euryarchaeota archaeon UBA50	NA
GCA_002503785.1	d__Archaea	p__Thermoplasmatota	c__Thermoplasmata	o__Methanomassiliicoccales	f__Methanomethylophilaceae	g__RumEn-M2	s__RumEn-M2 sp001421175	Methanomassiliicoccaceae archaeon UBA75	NA
GCA_002503805.1	d__Archaea	p__Halobacteriota	c__Methanosarcinia	o__Methanotrichales	f__Methanotrichaceae	g__Methanothrix_A	s__Methanothrix_A harundinacea_E	Methanothrix harundinacea	NA
GCA_002503825.1	d__Archaea	p__Halobacteriota	c__Methanomicrobia	o__Methanomicrobiales	f__Methanoregulaceae	g__UBA467	s__UBA467 sp002503825	Methanoregulaceae archaeon UBA467	NA
GCA_002503835.1	d__Archaea	p__Halobacteriota	c__Methanosarcinia	o__Methanotrichales	f__Methanotrichaceae	g__Methanothrix_A	s__Methanothrix_A harundinacea_B	Methanothrix harundinacea	NA
GCA_002503845.1	d__Archaea	p__Halobacteriota	c__Halobacteria	o__Halobacteriales	f__UBA12382	g__UBA12382	s__UBA12382 sp002503845	Euryarchaeota archaeon UBA24	NA
GCA_002503885.1	d__Archaea	p__Halobacteriota	c__Methanomicrobia	o__Methanomicrobiales	f__Methanoculleaceae	g__Methanoculleus	s__Methanoculleus marisnigri_B	Methanoculleus marisnigri	NA
GCA_002503905.1	d__Archaea	p__Thermoplasmatota	c__Poseidoniia	o__Poseidoniales	f__Poseidoniaceae	g__MGIIa-L1	s__MGIIa-L1 sp002697705	Euryarchaeota archaeon UBA562	NA
GCA_002503915.1	d__Archaea	p__Nanoarchaeota	c__Nanoarchaeia	o__Parvarchaeales	f__Parvarchaeaceae	g__Parvarchaeum	s__Parvarchaeum acidophilus	Candidatus Parvarchaeota archaeon UBA264	NA
GCA_002503925.1	d__Archaea	p__Thermoplasmatota	c__Thermoplasmata	o__Methanomassiliicoccales	f__Methanomethylophilaceae	g__UBA71	s__UBA71 sp002506425	Methanomassiliicoccaceae archaeon UBA481	NA
GCA_002503965.1	d__Archaea	p__Thermoplasmatota	c__Thermoplasmata	o__Thermoplasmatales	f__Thermoplasmataceae	g__UBA447	s__UBA447 sp002503205	Thermoplasmatales archaeon UBA266	NA
GCA_002503985.1	d__Archaea	p__Thermoplasmatota	c__Thermoplasmata	o__UBA184	f__UBA184	g__UBA184	s__UBA184 sp002503985	Thermoplasmata archaeon UBA61	NA
GCA_002503995.1	d__Archaea	p__Nanoarchaeota	c__Nanoarchaeia	o__Parvarchaeales	f__Parvarchaeaceae	g__Parvarchaeum	s__Parvarchaeum acidiphilum	Candidatus Parvarchaeota archaeon UBA265	NA
GCA_002504005.1	d__Archaea	p__Thermoplasmatota	c__Thermoplasmata	o__Thermoplasmatales	f__Thermoplasmataceae	g__Cuniculiplasma	s__Cuniculiplasma divulgatum	Thermoplasmatales archaeon UBA262	NA
GCA_002504045.1	d__Archaea	p__Thermoplasmatota	c__Poseidoniia	o__Poseidoniales	f__Thalassarchaeaceae	g__MGIIb-O1	s__MGIIb-O1 sp002497025	Euryarchaeota archaeon UBA108	NA
GCA_002504405.1	d__Archaea	p__Thermoplasmatota	c__Thermoplasmata	o__Methanomassiliicoccales	f__Methanomethylophilaceae	g__UBA71	s__UBA71 sp002504405	Methanomassiliicoccaceae archaeon UBA71	NA
GCA_002504415.1	d__Archaea	p__Thermoplasmatota	c__Poseidoniia	o__Poseidoniales	f__Thalassarchaeaceae	g__MGIIb-O1	s__MGIIb-O1 sp002498725	Euryarchaeota archaeon UBA252	NA
GCA_002504425.1	d__Archaea	p__Thermoproteota	c__Nitrososphaeria	o__Nitrososphaerales	f__Nitrososphaeraceae	g__Nitrosopolaris	s__Nitrosopolaris nunavutensis	Candidatus Nitrosopolaris nunavutensis	NA
GCA_002504435.1	d__Archaea	p__Thermoplasmatota	c__Poseidoniia	o__Poseidoniales	f__Thalassarchaeaceae	g__MGIIb-O5	s__MGIIb-O5 sp002504435	Euryarchaeota archaeon UBA438	NA
GCA_002504485.1	d__Archaea	p__Methanobacteriota	c__Methanobacteria	o__Methanobacteriales	f__Methanobacteriaceae	g__Methanobacterium_C	s__Methanobacterium_C sp002498385	Methanobacterium sp. UBA426	NA
GCA_002504495.1	d__Archaea	p__Thermoplasmatota	c__Thermoplasmata	o__Methanomassiliicoccales	f__Methanomethylophilaceae	g__UBA71	s__UBA71 sp002504495	Methanomassiliicoccaceae archaeon UBA537	NA
GCA_002504505.1	d__Archaea	p__Methanobacteriota	c__Methanobacteria	o__Methanobacteriales	f__Methanobacteriaceae	g__Methanobacterium_A	s__Methanobacterium_A sp002495625	Methanobacterium sp. UBA391	NA
GCA_002504525.1	d__Archaea	p__Thermoplasmatota	c__Thermoplasmata	o__Methanomassiliicoccales	f__Methanomassiliicoccaceae	g__DTU008	s__DTU008 sp002504525	Methanomassiliicoccus sp. UBA345	NA
GCA_002504565.1	d__Archaea	p__Thermoplasmatota	c__Poseidoniia	o__Poseidoniales	f__Thalassarchaeaceae	g__MGIIb-O1	s__MGIIb-O1 sp002502175	Euryarchaeota archaeon UBA600	NA
GCA_002504585.1	d__Archaea	p__Methanobacteriota	c__Methanobacteria	o__Methanobacteriales	f__Methanobacteriaceae	g__Methanobacterium_A	s__Methanobacterium_A sp002494495	Methanobacterium sp. UBA299	NA
GCA_002504595.1	d__Archaea	p__Thermoplasmatota	c__Poseidoniia	o__Poseidoniales	f__Poseidoniaceae	g__MGIIa-L1	s__MGIIa-L1 sp002729095	Euryarchaeota archaeon UBA17	NA
GCA_002504605.1	d__Archaea	p__Halobacteriota	c__Methanosarcinia	o__Methanosarcinales	f__Methanosarcinaceae	g__Methanosarcina	s__Methanosarcina sp002499445	Methanosarcina sp. UBA301	NA
GCA_002504645.1	d__Archaea	p__Thermoplasmatota	c__Thermoplasmata	o__Methanomassiliicoccales	f__Methanomethylophilaceae	g__VadinCA11	s__VadinCA11 sp002505345	Methanomassiliicoccaceae archaeon UBA306	NA
GCA_002504665.1	d__Archaea	p__Thermoplasmatota	c__Thermoplasmata	o__Thermoplasmatales	f__Thermoplasmataceae	g__UBA447	s__UBA447 sp002503205	Thermoplasmatales archaeon UBA613	NA
GCA_002504675.1	d__Archaea	p__Thermoplasmatota	c__Poseidoniia	o__Poseidoniales	f__Thalassarchaeaceae	g__MGIIb-N2	s__MGIIb-N2 sp002713585	Euryarchaeota archaeon UBA584	NA
GCA_002504695.1	d__Archaea	p__Thermoplasmatota	c__Poseidoniia	o__Poseidoniales	f__Poseidoniaceae	g__MGIIa-I	s__MGIIa-I sp002696315	Euryarchaeota archaeon UBA16	NA
GCA_002504725.1	d__Archaea	p__Methanobacteriota	c__Methanobacteria	o__Methanobacteriales	f__Methanobacteriaceae	g__UBA587	s__UBA587 sp002504725	Methanobacteriaceae archaeon UBA587	NA
GCA_002504745.1	d__Archaea	p__Thermoplasmatota	c__Thermoplasmata	o__Thermoplasmatales	f__Thermoplasmataceae	g__Cuniculiplasma	s__Cuniculiplasma divulgatum	Thermoplasmatales archaeon UBA505	NA
GCA_002504755.1	d__Archaea	p__Thermoplasmatota	c__Poseidoniia	o__Poseidoniales	f__Thalassarchaeaceae	g__Thalassarchaeum	s__Thalassarchaeum betae_A	Euryarchaeota archaeon UBA56	NA
GCA_002504765.1	d__Archaea	p__Methanobacteriota	c__Methanobacteria	o__Methanobacteriales	f__Methanobacteriaceae	g__Methanobacterium_C	s__Methanobacterium_C sp002498385	Methanobacterium sp. UBA390	NA
GCA_002504805.1	d__Archaea	p__Thermoplasmatota	c__Poseidoniia	o__Poseidoniales	f__Poseidoniaceae	g__MGIIa-K1	s__MGIIa-K1 sp902563095	Euryarchaeota archaeon UBA107	NA
GCA_002504825.1	d__Archaea	p__Thermoplasmatota	c__Poseidoniia	o__Poseidoniales	f__Thalassarchaeaceae	g__MGIIb-O5	s__MGIIb-O5 sp002496725	Euryarchaeota archaeon UBA555	NA
GCA_002504835.1	d__Archaea	p__Thermoplasmatota	c__Poseidoniia	o__Poseidoniales	f__Thalassarchaeaceae	g__Thalassarchaeum	s__Thalassarchaeum sp002714745	Euryarchaeota archaeon UBA540	NA
GCA_002504845.1	d__Archaea	p__Thermoplasmatota	c__Poseidoniia	o__Poseidoniales	f__Thalassarchaeaceae	g__MGIIb-N1	s__MGIIb-N1 sp002504845	Euryarchaeota archaeon UBA250	NA
GCA_002504885.1	d__Archaea	p__Thermoplasmatota	c__Poseidoniia	o__Poseidoniales	f__Thalassarchaeaceae	g__Thalassarchaeum	s__Thalassarchaeum sp002501885	Euryarchaeota archaeon UBA192	NA
GCA_002504905.1	d__Archaea	p__Thermoplasmatota	c__Poseidoniia	o__Poseidoniales	f__Thalassarchaeaceae	g__MGIIb-O2	s__MGIIb-O2 sp002504905	Euryarchaeota archaeon UBA605	NA
GCA_002504925.1	d__Archaea	p__Thermoplasmatota	c__Poseidoniia	o__Poseidoniales	f__Thalassarchaeaceae	g__MGIIb-O5	s__MGIIb-O5 sp002501605	Euryarchaeota archaeon UBA49	NA
GCA_002504935.1	d__Archaea	p__Thermoplasmatota	c__Poseidoniia	o__Poseidoniales	f__Poseidoniaceae	g__Poseidonia	s__Poseidonia sp002714305	Euryarchaeota archaeon UBA604	NA
GCA_002504965.1	d__Archaea	p__Methanobacteriota	c__Methanobacteria	o__Methanobacteriales	f__Methanobacteriaceae	g__Methanobacterium_A	s__Methanobacterium_A sp002494495	Methanobacterium sp. UBA350	NA
GCA_002504985.1	d__Archaea	p__Thermoproteota	c__Methanomethylicia	o__Methanomethylicales	f__Methanomethylicaceae	g__Methanomethylicus	s__Methanomethylicus oleisabuli	Candidatus Verstraetearchaeota archaeon UBA156	NA
GCA_002504995.1	d__Archaea	p__Thermoplasmatota	c__Poseidoniia	o__Poseidoniales	f__Poseidoniaceae	g__MGIIa-K1	s__MGIIa-K1 sp002507425	Euryarchaeota archaeon UBA120	NA
GCA_002505025.1	d__Archaea	p__Halobacteriota	c__Methanosarcinia	o__Methanotrichales	f__Methanotrichaceae	g__Methanothrix_A	s__Methanothrix_A sp001602645	Methanothrix harundinacea	NA
GCA_002505035.1	d__Archaea	p__Micrarchaeota	c__Micrarchaeia	o__Norongarragalinales	f__Norongarragalinaceae	g__UBA93	s__UBA93 sp002792915	Candidatus Micrarchaeota archaeon UBA93	NA
GCA_002505065.1	d__Archaea	p__Thermoplasmatota	c__Thermoplasmata	o__Thermoplasmatales	f__Thermoplasmataceae	g__Cuniculiplasma	s__Cuniculiplasma divulgatum	Thermoplasmatales archaeon UBA611	NA
GCA_002505075.1	d__Archaea	p__Nanoarchaeota	c__Nanoarchaeia	o__Parvarchaeales	f__Parvarchaeaceae	g__Parvarchaeum	s__Parvarchaeum acidiphilum	Candidatus Parvarchaeota archaeon UBA569	NA
GCA_002505105.1	d__Archaea	p__Thermoplasmatota	c__Thermoplasmata	o__Thermoplasmatales	f__Thermoplasmataceae	g__UBA509	s__UBA509 sp002498845	Thermoplasmatales archaeon UBA612	NA
GCA_002505115.1	d__Archaea	p__Nanoarchaeota	c__Nanoarchaeia	o__Parvarchaeales	f__Parvarchaeaceae	g__Parvarchaeum	s__Parvarchaeum acidophilus	Candidatus Parvarchaeota archaeon UBA614	NA
GCA_002505145.1	d__Archaea	p__Micrarchaeota	c__Micrarchaeia	o__Micrarchaeales	f__Micrarchaeaceae	g__Micrarchaeum_A	s__Micrarchaeum_A acidiphilum_A	Candidatus Micrarchaeota archaeon UBA615	NA
GCA_002505155.1	d__Archaea	p__Thermoplasmatota	c__Poseidoniia	o__Poseidoniales	f__Poseidoniaceae	g__MGIIa-L3	s__MGIIa-L3 sp002731395	Euryarchaeota archaeon UBA83	NA
GCA_002505185.1	d__Archaea	p__Thermoplasmatota	c__Thermoplasmata	o__Thermoplasmatales	f__Thermoplasmataceae	g__Ferroplasma	s__Ferroplasma sp002505185	Ferroplasmaceae archaeon UBA567	NA
GCA_002505195.1	d__Archaea	p__Thermoplasmatota	c__Thermoplasmata	o__Thermoplasmatales	f__Thermoplasmataceae	g__Cuniculiplasma	s__Cuniculiplasma divulgatum	Thermoplasmatales archaeon UBA566	NA
GCA_002505225.1	d__Archaea	p__Thermoplasmatota	c__Thermoplasmata	o__Methanomassiliicoccales	f__Methanomassiliicoccaceae	g__DTU008	s__DTU008 sp002504525	Methanomassiliicoccus sp. UBA429	NA
GCA_002505245.1	d__Archaea	p__Thermoplasmatota	c__Thermoplasmata	o__Methanomassiliicoccales	f__Methanomethylophilaceae	g__RumEn-M2	s__RumEn-M2 sp001421175	Methanomassiliicoccaceae archaeon UBA422	NA
GCA_002505265.1	d__Archaea	p__Thermoplasmatota	c__Poseidoniia	o__Poseidoniales	f__Thalassarchaeaceae	g__MGIIb-O3	s__MGIIb-O3 sp001629255	Euryarchaeota archaeon UBA112	NA
GCA_002505275.1	d__Archaea	p__Thermoplasmatota	c__Thermoplasmata	o__Methanomassiliicoccales	f__Methanomethylophilaceae	g__RumEn-M2	s__RumEn-M2 sp001421175	Methanomassiliicoccaceae archaeon UBA371	NA
GCA_002505305.1	d__Archaea	p__Thermoproteota	c__Nitrososphaeria	o__Nitrososphaerales	f__UBA57	g__UBA57	s__UBA57 sp002495905	Thaumarchaeota archaeon UBA539	NA
GCA_002505325.1	d__Archaea	p__Thermoplasmatota	c__Poseidoniia	o__Poseidoniales	f__Thalassarchaeaceae	g__Thalassarchaeum	s__Thalassarchaeum sp002505325	Euryarchaeota archaeon UBA623	NA
GCA_002505345.1	d__Archaea	p__Thermoplasmatota	c__Thermoplasmata	o__Methanomassiliicoccales	f__Methanomethylophilaceae	g__VadinCA11	s__VadinCA11 sp002505345	Methanomassiliicoccaceae archaeon UBA370	NA
GCA_002505355.1	d__Archaea	p__Thermoplasmatota	c__Poseidoniia	o__Poseidoniales	f__Poseidoniaceae	g__MGIIa-L1	s__MGIIa-L1 sp002505355	Euryarchaeota archaeon UBA229	NA
GCA_002505385.1	d__Archaea	p__Thermoplasmatota	c__Poseidoniia	o__Poseidoniales	f__Thalassarchaeaceae	g__MGIIb-O3	s__MGIIb-O3 sp002722735	Euryarchaeota archaeon UBA209	NA
GCA_002505405.1	d__Archaea	p__Thermoplasmatota	c__Poseidoniia	o__Poseidoniales	f__Poseidoniaceae	g__Poseidonia	s__Poseidonia alphae	Candidatus Poseidonia alphae	NA
GCA_002505415.1	d__Archaea	p__Thermoplasmatota	c__Poseidoniia	o__Poseidoniales	f__Poseidoniaceae	g__MGIIa-L2	s__MGIIa-L2 sp002722615	Euryarchaeota archaeon UBA618	NA
GCA_002505445.1	d__Archaea	p__Thermoplasmatota	c__Poseidoniia	o__Poseidoniales	f__Thalassarchaeaceae	g__MGIIb-O5	s__MGIIb-O5 sp002505775	Euryarchaeota archaeon UBA195	NA
GCA_002505455.1	d__Archaea	p__Thermoplasmatota	c__Poseidoniia	o__Poseidoniales	f__Thalassarchaeaceae	g__MGIIb-N1	s__MGIIb-N1 sp002505455	Euryarchaeota archaeon UBA52	NA
GCA_002505485.1	d__Archaea	p__Halobacteriota	c__Methanosarcinia	o__Methanosarcinales	f__Methanosarcinaceae	g__Methanosarcina	s__Methanosarcina sp002505485	Methanosarcina sp. UBA5	NA
GCA_002505495.1	d__Archaea	p__Thermoplasmatota	c__Poseidoniia	o__Poseidoniales	f__Thalassarchaeaceae	g__MGIIb-Q1	s__MGIIb-Q1 sp002505495	Euryarchaeota archaeon UBA59	NA
GCA_002505525.1	d__Archaea	p__Nanoarchaeota	c__Nanoarchaeia	o__Woesearchaeales	f__UBA583	g__UBA583	s__UBA583 sp002505525	archaeon UBA431	NA
GCA_002505535.1	d__Archaea	p__Methanobacteriota	c__Methanobacteria	o__Methanobacteriales	f__Methanobacteriaceae	g__Methanobacterium_C	s__Methanobacterium_C sp002498385	Methanobacterium sp. UBA385	NA
GCA_002505565.1	d__Archaea	p__Thermoplasmatota	c__Thermoplasmata	o__Thermoplasmatales	f__Thermoplasmataceae	g__Cuniculiplasma	s__Cuniculiplasma divulgatum	Thermoplasmatales archaeon UBA268	NA
GCA_002505585.1	d__Archaea	p__Nanoarchaeota	c__Nanoarchaeia	o__SCGC-AAA011-G17	f__UBA489	g__UBA489	s__UBA489 sp002505585	Candidatus Woesearchaeota archaeon UBA489	NA
GCA_002505605.1	d__Archaea	p__Methanobacteriota	c__Methanobacteria	o__Methanobacteriales	f__Methanobacteriaceae	g__Methanobrevibacter	s__Methanobrevibacter sp900314635	Methanobrevibacter sp. UBA187	NA
GCA_002505615.1	d__Archaea	p__Thermoplasmatota	c__Thermoplasmata	o__Thermoplasmatales	f__Thermoplasmataceae	g__UBA509	s__UBA509 sp002498845	Thermoplasmatales archaeon UBA269	NA
GCA_002505645.1	d__Archaea	p__Asgardarchaeota	c__Heimdallarchaeia	o__UBA460	f__UBA460	g__UBA460	s__UBA460 sp002505645	archaeon UBA460	NA
GCA_002505655.1	d__Archaea	p__Micrarchaeota	c__Micrarchaeia	o__Micrarchaeales	f__Micrarchaeaceae	g__Micrarchaeum	s__Micrarchaeum acidiphilum	Candidatus Micrarchaeota archaeon UBA510	NA
GCA_002505685.1	d__Archaea	p__Thermoplasmatota	c__Poseidoniia	o__Poseidoniales	f__Thalassarchaeaceae	g__MGIIb-P	s__MGIIb-P sp002505685	Euryarchaeota archaeon UBA501	NA
GCA_002505695.1	d__Archaea	p__Thermoplasmatota	c__Poseidoniia	o__Poseidoniales	f__Thalassarchaeaceae	g__MGIIb-N1	s__MGIIb-N1 sp002505695	Euryarchaeota archaeon UBA487	NA
GCA_002505725.1	d__Archaea	p__Methanobacteriota	c__Methanobacteria	o__Methanobacteriales	f__Methanobacteriaceae	g__Methanobacterium_C	s__Methanobacterium_C congolense	Methanobacterium sp. UBA339	NA
GCA_002505735.1	d__Archaea	p__Thermoplasmatota	c__Thermoplasmata	o__Methanomassiliicoccales	f__Methanomethylophilaceae	g__RumEn-M2	s__RumEn-M2 sp001421175	Methanomassiliicoccaceae archaeon UBA298	NA
GCA_002505765.1	d__Archaea	p__Methanobacteriota	c__Methanobacteria	o__Methanobacteriales	f__Methanobacteriaceae	g__Methanobacterium_D	s__Methanobacterium_D sp002505765	Methanobacterium sp. UBA176	NA
GCA_002505775.1	d__Archaea	p__Thermoplasmatota	c__Poseidoniia	o__Poseidoniales	f__Thalassarchaeaceae	g__MGIIb-O5	s__MGIIb-O5 sp002505775	Euryarchaeota archaeon UBA130	NA
GCA_002505805.1	d__Archaea	p__Halobacteriota	c__Methanosarcinia	o__Methanotrichales	f__Methanotrichaceae	g__Methanothrix	s__Methanothrix sp002505805	Methanosaeta sp. UBA80	NA
GCA_002505825.1	d__Archaea	p__Halobacteriota	c__Methanosarcinia	o__Methanosarcinales	f__Methanosarcinaceae	g__Methanosarcina	s__Methanosarcina sp002499445	Methanosarcina sp. UBA338	NA
GCA_002505845.1	d__Archaea	p__Nanoarchaeota	c__Nanoarchaeia	o__Woesearchaeales	f__UBA10216	g__UBA492	s__UBA492 sp002688315	Candidatus Woesearchaeota archaeon UBA142	NA
GCA_002505855.1	d__Archaea	p__Thermoplasmatota	c__Poseidoniia	o__Poseidoniales	f__Thalassarchaeaceae	g__MGIIb-O5	s__MGIIb-O5 sp002498925	Euryarchaeota archaeon UBA180	NA
GCA_002505885.1	d__Archaea	p__Thermoplasmatota	c__E2	o__DHVEG-1	f__DHVEG-1	g__SM1-50	s__SM1-50 sp002496355	Euryarchaeota archaeon UBA211	NA
GCA_002505895.1	d__Archaea	p__Methanobacteriota	c__Methanobacteria	o__Methanobacteriales	f__Methanobacteriaceae	g__Methanobacterium_C	s__Methanobacterium_C sp002498385	Methanobacterium sp. UBA341	NA
GCA_002505925.1	d__Archaea	p__Methanobacteriota	c__Methanobacteria	o__Methanobacteriales	f__Methanobacteriaceae	g__Methanobacterium_C	s__Methanobacterium_C sp002498385	Methanobacterium sp. UBA351	NA
GCA_002505935.1	d__Archaea	p__Thermoplasmatota	c__Poseidoniia	o__Poseidoniales	f__Poseidoniaceae	g__UBA226	s__UBA226 sp002505935	Euryarchaeota archaeon UBA226	NA
GCA_002505945.1	d__Archaea	p__Nanoarchaeota	c__Nanoarchaeia	o__Woesearchaeales	f__UBA119	g__UBA119	s__UBA119 sp002505945	Candidatus Woesearchaeota archaeon UBA119	NA
GCA_002505985.1	d__Archaea	p__Thermoplasmatota	c__Poseidoniia	o__Poseidoniales	f__Thalassarchaeaceae	g__Thalassarchaeum	s__Thalassarchaeum betae_A	Euryarchaeota archaeon UBA133	NA
GCA_002506005.1	d__Archaea	p__Thermoplasmatota	c__Poseidoniia	o__Poseidoniales	f__Thalassarchaeaceae	g__Thalassarchaeum	s__Thalassarchaeum sp002501885	Euryarchaeota archaeon UBA200	NA
GCA_002506015.1	d__Archaea	p__Halobacteriota	c__Methanosarcinia	o__Methanosarcinales	f__Methanogasteraceae	g__Methanogaster	s__Methanogaster sp002506015	Methanosarcinales archaeon UBA261	NA
GCA_002506025.1	d__Archaea	p__Thermoplasmatota	c__Poseidoniia	o__Poseidoniales	f__Poseidoniaceae	g__MGIIa-L1	s__MGIIa-L1 sp002506025	Euryarchaeota archaeon UBA111	NA
GCA_002506065.1	d__Archaea	p__Thermoplasmatota	c__Poseidoniia	o__Poseidoniales	f__Thalassarchaeaceae	g__MGIIb-O5	s__MGIIb-O5 sp002498925	Euryarchaeota archaeon UBA129	NA
GCA_002506085.1	d__Archaea	p__Halobacteriota	c__Methanomicrobia	o__Methanomicrobiales	f__Methanocorpusculaceae	g__Methanocorpusculum	s__Methanocorpusculum sp002506085	Methanocorpusculaceae archaeon UBA425	NA
GCA_002506095.1	d__Archaea	p__Halobacteriota	c__Methanosarcinia	o__Methanosarcinales	f__Methanosarcinaceae	g__Methanosarcina	s__Methanosarcina sp002499445	Methanosarcina sp. UBA423	NA
GCA_002506105.1	d__Archaea	p__Halobacteriota	c__Methanomicrobia	o__Methanomicrobiales	f__Methanoregulaceae	g__Methanolinea_A	s__Methanolinea_A sp002506105	Methanolinea sp. UBA275	NA
GCA_002506145.1	d__Archaea	p__Halobacteriota	c__Methanomicrobia	o__Methanomicrobiales	f__Methanoregulaceae	g__Methanoregula	s__Methanoregula sp002502245	Methanoregula sp. UBA274	NA
GCA_002506165.1	d__Archaea	p__Nanoarchaeota	c__Nanoarchaeia	o__SCGC-AAA011-G17	f__UBA489	g__UBA489	s__UBA489 sp002505585	Candidatus Woesearchaeota archaeon UBA544	NA
GCA_002506175.1	d__Archaea	p__Thermoplasmatota	c__Thermoplasmata	o__Methanomassiliicoccales	f__Methanomethylophilaceae	g__UBA71	s__UBA71 sp002506175	Methanomassiliicoccaceae archaeon UBA113	NA
GCA_002506185.1	d__Archaea	p__Thermoplasmatota	c__Poseidoniia	o__Poseidoniales	f__Thalassarchaeaceae	g__MGIIb-O5	s__MGIIb-O5 sp002718995	Euryarchaeota archaeon UBA249	NA
GCA_002506225.1	d__Archaea	p__Thermoplasmatota	c__Thermoplasmata	o__Thermoplasmatales	f__Thermoplasmataceae	g__Cuniculiplasma	s__Cuniculiplasma divulgatum	Thermoplasmatales archaeon UBA564	NA
GCA_002506245.1	d__Archaea	p__Thermoplasmatota	c__Thermoplasmata	o__Thermoplasmatales	f__Thermoplasmataceae	g__UBA509	s__UBA509 sp002498845	Thermoplasmatales archaeon UBA565	NA
GCA_002506255.1	d__Archaea	p__Thermoplasmatota	c__Thermoplasmata	o__Methanomassiliicoccales	f__Methanomethylophilaceae	g__RumEn-M2	s__RumEn-M2 sp002506255	Methanomassiliicoccaceae archaeon UBA367	NA
GCA_002506275.1	d__Archaea	p__Thermoplasmatota	c__Poseidoniia	o__Poseidoniales	f__Poseidoniaceae	g__MGIIa-L1	s__MGIIa-L1 sp002506275	Euryarchaeota archaeon UBA259	NA
GCA_002506305.1	d__Archaea	p__Thermoplasmatota	c__Poseidoniia	o__Poseidoniales	f__Thalassarchaeaceae	g__MGIIb-O1	s__MGIIb-O1 sp002498725	Euryarchaeota archaeon UBA500	NA
GCA_002506325.1	d__Archaea	p__Thermoplasmatota	c__Thermoplasmata	o__Methanomassiliicoccales	f__Methanomethylophilaceae	g__RumEn-M2	s__RumEn-M2 sp001421175	Methanomassiliicoccaceae archaeon UBA314	NA
GCA_002506335.1	d__Archaea	p__Halobacteriota	c__Methanosarcinia	o__Methanotrichales	f__Methanotrichaceae	g__UBA114	s__UBA114 sp002506335	Methanosaeta sp. UBA114	NA
GCA_002506365.1	d__Archaea	p__Nanoarchaeota	c__Nanoarchaeia	o__Woesearchaeales	f__UBA583	g__UBA583	s__UBA583 sp002506365	archaeon UBA583	NA
GCA_002506385.1	d__Archaea	p__Thermoplasmatota	c__Poseidoniia	o__Poseidoniales	f__Poseidoniaceae	g__MGIIa-L2	s__MGIIa-L2 sp002698145	Euryarchaeota archaeon UBA110	NA
GCA_002506405.1	d__Archaea	p__Thermoplasmatota	c__Poseidoniia	o__Poseidoniales	f__Thalassarchaeaceae	g__Thalassarchaeum	s__Thalassarchaeum sp002503055	Euryarchaeota archaeon UBA22	NA
GCA_002506415.1	d__Archaea	p__Halobacteriota	c__Methanosarcinia	o__Methanosarcinales	f__Methanosarcinaceae	g__Methanosarcina	s__Methanosarcina mazei	Methanosarcina mazei	NA
GCA_002506425.1	d__Archaea	p__Thermoplasmatota	c__Thermoplasmata	o__Methanomassiliicoccales	f__Methanomethylophilaceae	g__UBA71	s__UBA71 sp002506425	Methanomassiliicoccaceae archaeon UBA480	NA
GCA_002506455.1	d__Archaea	p__Halobacteriota	c__Methanosarcinia	o__Methanosarcinales	f__Methanosarcinaceae	g__Methanosarcina	s__Methanosarcina sp002499445	Methanosarcina sp. UBA383	NA
GCA_002506485.1	d__Archaea	p__Thermoplasmatota	c__Poseidoniia	o__MGIII	f__CG-Epi1	g__CG-Epi1	s__CG-Epi1 sp002506485	Euryarchaeota archaeon UBA136	NA
GCA_002506495.1	d__Archaea	p__Thermoplasmatota	c__Poseidoniia	o__Poseidoniales	f__Thalassarchaeaceae	g__Thalassarchaeum	s__Thalassarchaeum sp002503055	Euryarchaeota archaeon UBA197	NA
GCA_002506515.1	d__Archaea	p__Thermoproteota	c__Thermoprotei	o__Thermoproteales	f__Thermocladiaceae	g__Caldivirga	s__Caldivirga sp002506515	Caldivirga sp. UBA161	NA
GCA_002506535.1	d__Archaea	p__Halobacteriota	c__Methanosarcinia	o__Methanotrichales	f__Methanotrichaceae	g__Methanothrix_A	s__Methanothrix_A harundinacea_B	Methanothrix harundinacea	NA
GCA_002506565.1	d__Archaea	p__Thermoplasmatota	c__Thermoplasmata	o__Methanomassiliicoccales	f__Methanomethylophilaceae	g__VadinCA11	s__VadinCA11 sp002505345	Methanomassiliicoccaceae archaeon UBA333	NA
GCA_002506585.1	d__Archaea	p__Halobacteriota	c__Methanomicrobia	o__Methanomicrobiales	f__Methanoculleaceae	g__Methanoculleus	s__Methanoculleus sp002506585	Methanoculleus sp. UBA430	NA
GCA_002506595.1	d__Archaea	p__Thermoproteota	c__Thermoprotei_A	o__Sulfolobales	f__Acidilobaceae	g__Caldisphaera	s__Caldisphaera sp002506595	Acidilobaceae archaeon UBA158	NA
GCA_002506605.1	d__Archaea	p__Thermoproteota	c__Nitrososphaeria	o__Conexivisphaerales	f__UBA164	g__UBA164	s__UBA164 sp002506605	Thaumarchaeota archaeon UBA160	NA
GCA_002506645.1	d__Archaea	p__Thermoproteota	c__Thermoprotei	o__Thermoproteales	f__Thermocladiaceae	g__Vulcanisaeta	s__Vulcanisaeta distributa_D	Vulcanisaeta distributa	NA
GCA_002506665.1	d__Archaea	p__Thermoproteota	c__Nitrososphaeria	o__Nitrososphaerales	f__Nitrosopumilaceae	g__Nitrosopumilus	s__Nitrosopumilus sp002506665	Nitrosopumilus sp. UBA526	NA
GCA_002506675.1	d__Archaea	p__Thermoplasmatota	c__Poseidoniia	o__Poseidoniales	f__Thalassarchaeaceae	g__MGIIb-O1	s__MGIIb-O1 sp002502175	Euryarchaeota archaeon UBA551	NA
GCA_002506705.1	d__Archaea	p__Thermoplasmatota	c__Poseidoniia	o__Poseidoniales	f__Poseidoniaceae	g__MGIIa-K1	s__MGIIa-K1 sp002506705	Euryarchaeota archaeon UBA550	NA
GCA_002506725.1	d__Archaea	p__Thermoplasmatota	c__Poseidoniia	o__Poseidoniales	f__Poseidoniaceae	g__MGIIa-K1	s__MGIIa-K1 sp002498185	Euryarchaeota archaeon UBA545	NA
GCA_002506745.1	d__Archaea	p__Thermoplasmatota	c__E2	o__DHVEG-1	f__DHVEG-1	g__SM1-50	s__SM1-50 sp002506745	Euryarchaeota archaeon UBA33	NA
GCA_002506755.1	d__Archaea	p__Thermoplasmatota	c__Poseidoniia	o__Poseidoniales	f__Thalassarchaeaceae	g__MGIIb-O3	s__MGIIb-O3 sp002506755	Euryarchaeota archaeon UBA462	NA
GCA_002506785.1	d__Archaea	p__Halobacteriota	c__Methanomicrobia	o__Methanomicrobiales	f__Methanoregulaceae	g__Methanoregula	s__Methanoregula sp002502245	Methanoregula sp. UBA452	NA
GCA_002506795.1	d__Archaea	p__Methanobacteriota	c__Methanobacteria	o__Methanobacteriales	f__Methanobacteriaceae	g__Methanobacterium_C	s__Methanobacterium_C sp002498385	Methanobacterium sp. UBA397	NA
GCA_002506825.1	d__Archaea	p__Thermoplasmatota	c__Poseidoniia	o__Poseidoniales	f__Thalassarchaeaceae	g__MGIIb-O5	s__MGIIb-O5 sp002506825	Euryarchaeota archaeon UBA103	NA
GCA_002506845.1	d__Archaea	p__Halobacteriota	c__Methanosarcinia	o__Methanosarcinales	f__Methanosarcinaceae	g__Methanosarcina	s__Methanosarcina sp002499445	Methanosarcina sp. UBA398	NA
GCA_002506865.1	d__Archaea	p__Thermoplasmatota	c__Thermoplasmata	o__Methanomassiliicoccales	f__Methanomethylophilaceae	g__RumEn-M2	s__RumEn-M2 sp001421175	Methanomassiliicoccaceae archaeon UBA329	NA
GCA_002506875.1	d__Archaea	p__Thermoplasmatota	c__Poseidoniia	o__Poseidoniales	f__Thalassarchaeaceae	g__MGIIb-N2	s__MGIIb-N2 sp002506875	Euryarchaeota archaeon UBA40	NA
GCA_002506905.1	d__Archaea	p__Thermoplasmatota	c__Thermoplasmata	o__Methanomassiliicoccales	f__Methanomethylophilaceae	g__Methanogranum	s__Methanogranum sp002506905	Methanomassiliicoccaceae archaeon UBA328	NA
GCA_002506915.1	d__Archaea	p__Halobacteriota	c__Methanosarcinia	o__Methanosarcinales	f__Methanosarcinaceae	g__Methanosarcina	s__Methanosarcina sp002499445	Methanosarcina sp. UBA369	NA
GCA_002506945.1	d__Archaea	p__Thermoplasmatota	c__Thermoplasmata	o__Thermoplasmatales	f__Thermoplasmataceae	g__UBA509	s__UBA509 sp002498845	Thermoplasmatales archaeon UBA571	NA
GCA_002506955.1	d__Archaea	p__Thermoplasmatota	c__Thermoplasmata	o__Thermoplasmatales	f__Thermoplasmataceae	g__UBA509	s__UBA509 sp002498845	Thermoplasmatales archaeon UBA578	NA
GCA_002506985.1	d__Archaea	p__Thermoplasmatota	c__Thermoplasmata	o__Methanomassiliicoccales	f__UBA472	g__UBA472	s__UBA472 sp8940u	Methanomassiliicoccaceae archaeon UBA248	NA
GCA_002506995.1	d__Archaea	p__Thermoplasmatota	c__Thermoplasmata	o__Methanomassiliicoccales	f__Methanomethylophilaceae	g__VadinCA11	s__VadinCA11 sp002498365	Methanomassiliicoccaceae archaeon UBA427	NA
GCA_002507025.1	d__Archaea	p__Methanobacteriota	c__Methanobacteria	o__Methanobacteriales	f__Methanobacteriaceae	g__Methanobacterium_C	s__Methanobacterium_C sp002498385	Methanobacterium sp. UBA373	NA
GCA_002507035.1	d__Archaea	p__Halobacteriota	c__Methanosarcinia	o__Methanotrichales	f__Methanotrichaceae	g__Methanothrix	s__Methanothrix soehngenii	Methanosaeta sp. UBA372	NA
GCA_002507065.1	d__Archaea	p__Halobacteriota	c__Methanosarcinia	o__Methanosarcinales	f__Methanosarcinaceae	g__Methanosarcina	s__Methanosarcina mazei	Methanosarcina mazei	NA
GCA_002507085.1	d__Archaea	p__Thermoproteota	c__Thermoprotei_A	o__Marsarchaeales	f__UBA168	g__UBA168	s__UBA168 sp002507085	archaeon UBA168	NA
GCA_002507095.1	d__Archaea	p__Methanobacteriota	c__Methanobacteria	o__Methanobacteriales	f__Methanobacteriaceae	g__Methanobacterium	s__Methanobacterium subterraneum	Methanobacterium sp. UBA455	NA
GCA_002507125.1	d__Archaea	p__Thermoplasmatota	c__Poseidoniia	o__Poseidoniales	f__Thalassarchaeaceae	g__Thalassarchaeum	s__Thalassarchaeum sp002507125	Euryarchaeota archaeon UBA528	NA
GCA_002507145.1	d__Archaea	p__Thermoplasmatota	c__Poseidoniia	o__Poseidoniales	f__Thalassarchaeaceae	g__MGIIb-N1	s__MGIIb-N1 sp002499585	Euryarchaeota archaeon UBA598	NA
GCA_002507165.1	d__Archaea	p__Thermoplasmatota	c__Poseidoniia	o__Poseidoniales	f__Poseidoniaceae	g__MGIIa-L3	s__MGIIa-L3 sp002723635	Euryarchaeota archaeon UBA559	NA
GCA_002507175.1	d__Archaea	p__Thermoplasmatota	c__Poseidoniia	o__Poseidoniales	f__Thalassarchaeaceae	g__MGIIb-N1	s__MGIIb-N1 sp002507175	Euryarchaeota archaeon UBA558	NA
GCA_002507205.1	d__Archaea	p__Halobacteriota	c__Methanosarcinia	o__Methanosarcinales	f__Methanosarcinaceae	g__Methanolobus	s__Methanolobus sp002507205	Methanolobus sp. UBA32	NA
GCA_002507245.1	d__Archaea	p__Thermoproteota	c__Bathyarchaeia	o__B26-1	f__UBA233	g__UBA233	s__UBA233 sp002507245	Candidatus Bathyarchaeota archaeon UBA233	NA
GCA_002507265.1	d__Archaea	p__Halobacteriota	c__Methanosarcinia	o__Methanotrichales	f__Methanotrichaceae	g__Methanothrix	s__Methanothrix soehngenii	Methanosaeta sp. UBA332	NA
GCA_002507275.1	d__Archaea	p__Halobacteriota	c__Archaeoglobi	o__Archaeoglobales	f__Archaeoglobaceae	g__Geoglobus	s__Geoglobus sp002494725	Geoglobus sp. UBA232	NA
GCA_002507305.1	d__Archaea	p__Thermoplasmatota	c__Poseidoniia	o__Poseidoniales	f__Thalassarchaeaceae	g__MGIIb-O1	s__MGIIb-O1 sp002502175	Euryarchaeota archaeon UBA529	NA
GCA_002507315.1	d__Archaea	p__Halobacteriota	c__Archaeoglobi	o__Archaeoglobales	f__Archaeoglobaceae	g__Archaeoglobus	s__Archaeoglobus sp002507545	Archaeoglobus sp. UBA231	NA
GCA_002507345.1	d__Archaea	p__Thermoplasmatota	c__Poseidoniia	o__Poseidoniales	f__Thalassarchaeaceae	g__MGIIb-N1	s__MGIIb-N1 sp002505695	Euryarchaeota archaeon UBA98	NA
GCA_002507365.1	d__Archaea	p__Thermoplasmatota	c__Thermoplasmata	o__Thermoplasmatales	f__Thermoplasmataceae	g__UBA509	s__UBA509 sp002498845	Thermoplasmatales archaeon UBA617	NA
GCA_002507385.1	d__Archaea	p__Micrarchaeota	c__Micrarchaeia	o__Norongarragalinales	f__UBA97	g__UBA97	s__UBA97 sp001871595	Candidatus Micrarchaeota archaeon UBA97	NA
GCA_002507395.1	d__Archaea	p__Thermoproteota	c__Methanomethylicia	o__Methanomethylicales	f__Methanomethylicaceae	g__Methanomethylicus	s__Methanomethylicus mesodigestus	Candidatus Verstraetearchaeota archaeon UBA76	NA
GCA_002507425.1	d__Archaea	p__Thermoplasmatota	c__Poseidoniia	o__Poseidoniales	f__Poseidoniaceae	g__MGIIa-K1	s__MGIIa-K1 sp002507425	Euryarchaeota archaeon UBA53	NA
GCA_002507545.1	d__Archaea	p__Halobacteriota	c__Archaeoglobi	o__Archaeoglobales	f__Archaeoglobaceae	g__Archaeoglobus	s__Archaeoglobus sp002507545	Archaeoglobus sp. UBA230	NA
GCA_002507555.1	d__Archaea	p__Thermoplasmatota	c__Thermoplasmata	o__Thermoplasmatales	f__Thermoplasmataceae	g__UBA509	s__UBA509 sp002498845	Thermoplasmatales archaeon UBA445	NA
GCA_002508305.1	d__Archaea	p__Thermoproteota	c__Nitrososphaeria	o__Nitrososphaerales	f__UBA57	g__UBA57	s__UBA57 sp002495905	Thaumarchaeota archaeon UBA201	NA
GCA_002508315.1	d__Archaea	p__Thermoproteota	c__Thermoprotei	o__Thermoproteales	f__Thermocladiaceae	g__Thermocladium	s__Thermocladium sp002508315	Thermocladium sp. UBA166	NA
GCA_002508325.1	d__Archaea	p__Thermoplasmatota	c__Thermoplasmata	o__Thermoplasmatales	f__Thermoplasmataceae	g__Cuniculiplasma	s__Cuniculiplasma divulgatum	Thermoplasmatales archaeon UBA577	NA
GCA_002508335.1	d__Archaea	p__Thermoplasmatota	c__Thermoplasmata	o__Thermoplasmatales	f__Thermoplasmataceae	g__Cuniculiplasma	s__Cuniculiplasma divulgatum	Thermoplasmatales archaeon UBA444	NA
GCA_002508385.1	d__Archaea	p__Halobacteriota	c__Methanosarcinia	o__Methanosarcinales	f__Methanosarcinaceae	g__Methanomethylovorans	s__Methanomethylovorans hollandica	Methanosarcinaceae archaeon UBA151	NA
GCA_002508395.1	d__Archaea	p__Thermoproteota	c__Nitrososphaeria	o__Nitrososphaerales	f__Nitrosopumilaceae	g__Nitrosopumilus	s__Nitrosopumilus sp001437625	Nitrosopumilus sp. UBA241	NA
GCA_002508425.1	d__Archaea	p__Halobacteriota	c__Methanosarcinia	o__Methanosarcinales	f__Methanosarcinaceae	g__Methanomethylovorans	s__Methanomethylovorans sp002508425	Methanosarcinaceae archaeon UBA470	NA
GCA_002508435.1	d__Archaea	p__Thermoproteota	c__Nitrososphaeria	o__Nitrososphaerales	f__Nitrososphaeraceae	g__Nitrososphaera	s__Nitrososphaera sp002501845	Nitrososphaera sp. UBA240	NA
GCA_002508465.1	d__Archaea	p__Halobacteriota	c__Methanosarcinia	o__Methanosarcinales	f__Methanosarcinaceae	g__Methanosarcina	s__Methanosarcina spelaei	Methanosarcina sp. UBA7	NA
GCA_002508475.1	d__Archaea	p__Halobacteriota	c__Methanosarcinia	o__Methanosarcinales	f__Methanosarcinaceae	g__Methanosarcina	s__Methanosarcina sp002499445	Methanosarcina sp. UBA392	NA
GCA_002508495.1	d__Archaea	p__Halobacteriota	c__Methanomicrobia	o__Methanomicrobiales	f__Methanoregulaceae	g__Methanoregula	s__Methanoregula sp002508495	Methanoregula sp. UBA276	NA
GCA_002508505.1	d__Archaea	p__Halobacteriota	c__Methanosarcinia	o__Methanosarcinales	f__Methanosarcinaceae	g__Methanosarcina	s__Methanosarcina sp002499445	Methanosarcina sp. UBA304	NA
GCA_002508545.1	d__Archaea	p__Thermoplasmatota	c__Thermoplasmata	o__Methanomassiliicoccales	f__Methanomassiliicoccaceae	g__UBA6	s__UBA6 sp002508545	Methanomassiliicoccus sp. UBA6	NA
GCA_002508555.1	d__Archaea	p__Thermoplasmatota	c__Thermoplasmata	o__Methanomassiliicoccales	f__Methanomassiliicoccaceae	g__DTU008	s__DTU008 sp002504525	Methanomassiliicoccus sp. UBA364	NA
GCA_002508585.1	d__Archaea	p__Thermoplasmatota	c__Thermoplasmata	o__Methanomassiliicoccales	f__Methanomassiliicoccaceae	g__DTU008	s__DTU008 sp002504525	Methanomassiliicoccus sp. UBA360	NA
GCA_002508595.1	d__Archaea	p__Thermoplasmatota	c__Thermoplasmata	o__Methanomassiliicoccales	f__Methanomethylophilaceae	g__UBA71	s__UBA71 sp002506425	Methanomassiliicoccaceae archaeon UBA48	NA
GCA_002508625.1	d__Archaea	p__Thermoplasmatota	c__Thermoplasmata	o__Methanomassiliicoccales	f__Methanomethylophilaceae	g__VadinCA11	s__VadinCA11 sp002498365	Methanomassiliicoccaceae archaeon UBA344	NA
GCA_002508635.1	d__Archaea	p__Halobacteriota	c__Methanosarcinia	o__Methanosarcinales	f__Methanosarcinaceae	g__Methanolobus	s__Methanolobus sp002508635	Methanolobus sp. UBA118	NA
GCA_002508665.1	d__Archaea	p__Halobacteriota	c__Methanomicrobia	o__Methanomicrobiales	f__Methanoculleaceae	g__Methanoculleus	s__Methanoculleus sp002508705	Methanoculleus sp. UBA416	NA
GCA_002508675.1	d__Archaea	p__Halobacteriota	c__Methanomicrobia	o__Methanomicrobiales	f__Methanoculleaceae	g__Methanoculleus	s__Methanoculleus sp002508705	Methanoculleus sp. UBA389	NA
GCA_002508705.1	d__Archaea	p__Halobacteriota	c__Methanomicrobia	o__Methanomicrobiales	f__Methanoculleaceae	g__Methanoculleus	s__Methanoculleus sp002508705	Methanoculleus sp. UBA374	NA
GCA_002508725.1	d__Archaea	p__Halobacteriota	c__Methanomicrobia	o__Methanomicrobiales	f__Methanoculleaceae	g__Methanoculleus	s__Methanoculleus sp002508705	Methanoculleus sp. UBA340	NA
GCA_002508745.1	d__Archaea	p__Halobacteriota	c__Methanomicrobia	o__Methanomicrobiales	f__Methanoculleaceae	g__Methanoculleus	s__Methanoculleus sp002508705	Methanoculleus sp. UBA334	NA
GCA_002508765.1	d__Archaea	p__Halobacteriota	c__Methanomicrobia	o__Methanomicrobiales	f__Methanoculleaceae	g__Methanoculleus	s__Methanoculleus sp002508705	Methanoculleus sp. UBA331	NA
GCA_002508775.1	d__Archaea	p__Halobacteriota	c__Methanomicrobia	o__Methanomicrobiales	f__Methanoculleaceae	g__Methanoculleus	s__Methanoculleus sp002508705	Methanoculleus sp. UBA312	NA
GCA_002508805.1	d__Archaea	p__Halobacteriota	c__Methanomicrobia	o__Methanomicrobiales	f__Methanoculleaceae	g__Methanoculleus	s__Methanoculleus sp002508705	Methanoculleus sp. UBA300	NA
GCA_002508825.1	d__Archaea	p__Methanobacteriota	c__Methanobacteria	o__Methanobacteriales	f__Methanobacteriaceae	g__UBA412	s__UBA412 sp002495685	Methanobrevibacter sp. UBA46	NA
GCA_002508845.1	d__Archaea	p__Methanobacteriota	c__Methanobacteria	o__Methanobacteriales	f__Methanobacteriaceae	g__UBA412	s__UBA412 sp002495685	Methanobrevibacter sp. UBA417	NA
GCA_002508855.1	d__Archaea	p__Methanobacteriota	c__Methanobacteria	o__Methanobacteriales	f__Methanobacteriaceae	g__UBA412	s__UBA412 sp002495685	Methanobrevibacter sp. UBA403	NA
GCA_002508885.1	d__Archaea	p__Methanobacteriota	c__Methanobacteria	o__Methanobacteriales	f__Methanobacteriaceae	g__UBA412	s__UBA412 sp002495685	Methanobrevibacter sp. UBA395	NA
GCA_002508905.1	d__Archaea	p__Methanobacteriota	c__Methanobacteria	o__Methanobacteriales	f__Methanobacteriaceae	g__UBA412	s__UBA412 sp002495685	Methanobrevibacter sp. UBA365	NA
GCA_002508925.1	d__Archaea	p__Methanobacteriota	c__Methanobacteria	o__Methanobacteriales	f__Methanobacteriaceae	g__UBA412	s__UBA412 sp002495685	Methanobrevibacter sp. UBA325	NA
GCA_002508935.1	d__Archaea	p__Methanobacteriota	c__Methanobacteria	o__Methanobacteriales	f__Methanobacteriaceae	g__UBA412	s__UBA412 sp002495685	Methanobrevibacter sp. UBA352	NA
GCA_002508965.1	d__Archaea	p__Methanobacteriota	c__Methanobacteria	o__Methanobacteriales	f__Methanobacteriaceae	g__Methanobrevibacter	s__Methanobrevibacter sp900314635	Methanobrevibacter sp. UBA190	NA
GCA_002509005.1	d__Archaea	p__Methanobacteriota	c__Methanobacteria	o__Methanobacteriales	f__Methanobacteriaceae	g__Methanobacterium	s__Methanobacterium sp002496805	Methanobacterium sp. UBA388	NA
GCA_002509015.1	d__Archaea	p__Methanobacteriota	c__Methanobacteria	o__Methanobacteriales	f__Methanobacteriaceae	g__Methanobrevibacter_A	s__Methanobrevibacter_A sp900314695	Methanobrevibacter sp. UBA188	NA
GCA_002509045.1	d__Archaea	p__Methanobacteriota	c__Methanobacteria	o__Methanobacteriales	f__Methanobacteriaceae	g__Methanobacterium_A	s__Methanobacterium_A sp002494495	Methanobacterium sp. UBA368	NA
GCA_002509085.1	d__Archaea	p__Methanobacteriota	c__Methanobacteria	o__Methanobacteriales	f__Methanobacteriaceae	g__UBA588	s__UBA588 sp002509085	Methanobacteriaceae archaeon UBA588	NA
GCA_002509095.1	d__Archaea	p__Methanobacteriota	c__Methanobacteria	o__Methanobacteriales	f__Methanobacteriaceae	g__Methanosphaera	s__Methanosphaera sp900322125	Methanobacteriaceae archaeon UBA254	NA
GCA_002509125.1	d__Archaea	p__Methanobacteriota	c__Methanobacteria	o__Methanobacteriales	f__Methanobacteriaceae	g__Methanosphaera	s__Methanosphaera sp11921u	Methanobacteriaceae archaeon UBA237	NA
GCA_002509145.1	d__Archaea	p__Thermoproteota	c__Thermoprotei_A	o__Sulfolobales	f__Sulfolobaceae	g__Metallosphaera	s__Metallosphaera sedula	Metallosphaera sp. UBA165	NA
GCA_002509165.1	d__Archaea	p__Thermoplasmatota	c__Poseidoniia	o__MGIII	f__CG-Epi1	g__UBA8886	s__UBA8886 sp002509165	Euryarchaeota archaeon UBA488	NA
GCA_002509175.1	d__Archaea	p__Thermoplasmatota	c__E2	o__DHVEG-1	f__DHVEG-1	g__SM1-50	s__SM1-50 sp002496355	Euryarchaeota archaeon UBA585	NA
GCA_002509195.1	d__Archaea	p__Thermoplasmatota	c__Poseidoniia	o__MGIII	f__CG-Epi1	g__CG-Epi1	s__CG-Epi1 sp002506485	Euryarchaeota archaeon UBA440	NA
GCA_002509225.1	d__Archaea	p__Thermoplasmatota	c__Poseidoniia	o__MGIII	f__CG-Epi1	g__UBA102	s__UBA102 sp002509225	Euryarchaeota archaeon UBA102	NA
GCA_002509245.1	d__Archaea	p__Thermoproteota	c__Bathyarchaeia	o__B26-1	f__BA1	g__BA2	s__BA2 sp001399795	Candidatus Bathyarchaeota archaeon UBA589	NA
GCA_002509255.1	d__Archaea	p__Thermoplasmatota	c__Thermoplasmata	o__Thermoplasmatales	f__Thermoplasmataceae	g__Cuniculiplasma	s__Cuniculiplasma divulgatum	Thermoplasmatales archaeon UBA570	NA
GCA_002509265.1	d__Archaea	p__Thermoplasmatota	c__Thermoplasmata	o__Thermoplasmatales	f__Thermoplasmataceae	g__Cuniculiplasma	s__Cuniculiplasma divulgatum	Thermoplasmatales archaeon UBA520	NA
GCA_002509305.1	d__Archaea	p__Thermoplasmatota	c__Thermoplasmata	o__Thermoplasmatales	f__Thermoplasmataceae	g__UBA447	s__UBA447 sp002503205	Thermoplasmatales archaeon UBA518	NA
GCA_002509325.1	d__Archaea	p__Halobacteriota	c__Methanosarcinia	o__Methanosarcinales	f__Methanosarcinaceae	g__Methanosarcina	s__Methanosarcina sp002509325	Methanosarcina sp. UBA402	NA
GCA_002509335.1	d__Archaea	p__Halobacteriota	c__Methanosarcinia	o__Methanosarcinales	f__Methanosarcinaceae	g__Methanosarcina	s__Methanosarcina sp002499445	Methanosarcina sp. UBA342	NA
GCA_002509345.1	d__Archaea	p__Halobacteriota	c__Methanomicrobia	o__Methanomicrobiales	f__Methanoregulaceae	g__Methanoregula	s__Methanoregula sp002495055	Methanoregula sp. UBA469	NA
GCA_002509385.1	d__Archaea	p__Halobacteriota	c__Bog-38	o__Bog-38	f__Bog-38	g__Bog-38	s__Bog-38 sp003139855	Methanomicrobia archaeon UBA590	NA
GCA_002509405.1	d__Archaea	p__Thermoplasmatota	c__Thermoplasmata	o__Methanomassiliicoccales	f__Methanomethylophilaceae	g__VadinCA11	s__VadinCA11 sp002509405	Methanomassiliicoccaceae archaeon UBA72	NA
GCA_002509415.1	d__Archaea	p__Thermoplasmatota	c__Thermoplasmata	o__Methanomassiliicoccales	f__Methanomethylophilaceae	g__RumEn-M2	s__RumEn-M2 sp001421175	Methanomassiliicoccaceae archaeon UBA319	NA
GCA_002509425.1	d__Archaea	p__Thermoplasmatota	c__Thermoplasmata	o__Methanomassiliicoccales	f__Methanomethylophilaceae	g__RumEn-M2	s__RumEn-M2 sp001421175	Methanomassiliicoccaceae archaeon UBA359	NA
GCA_002509465.1	d__Archaea	p__Thermoplasmatota	c__Thermoplasmata	o__Methanomassiliicoccales	f__Methanomethylophilaceae	g__VadinCA11	s__VadinCA11 sp002498365	Methanomassiliicoccaceae archaeon UBA308	NA
GCA_002509485.1	d__Archaea	p__Halobacteriota	c__Methanomicrobia	o__Methanomicrobiales	f__Methanoregulaceae	g__SD8	s__SD8 sp002509485	Methanolinea sp. UBA477	NA
GCA_002509495.1	d__Archaea	p__Halobacteriota	c__Methanomicrobia	o__Methanomicrobiales	f__Methanoregulaceae	g__Methanolinea_A	s__Methanolinea_A sp002509495	Methanolinea sp. UBA473	NA
GCA_002509505.1	d__Archaea	p__Halobacteriota	c__Methanomicrobia	o__Methanomicrobiales	f__Methanoregulaceae	g__Methanolinea_A	s__Methanolinea_A sp002506105	Methanolinea sp. UBA155	NA
GCA_002509545.1	d__Archaea	p__Halobacteriota	c__Methanomicrobia	o__Methanomicrobiales	f__Methanoculleaceae	g__Methanoculleus	s__Methanoculleus sp002508705	Methanoculleus sp. UBA45	NA
GCA_002509565.1	d__Archaea	p__Halobacteriota	c__Methanomicrobia	o__Methanomicrobiales	f__Methanoculleaceae	g__Methanoculleus	s__Methanoculleus sp002508705	Methanoculleus sp. UBA377	NA
GCA_002509575.1	d__Archaea	p__Halobacteriota	c__Methanomicrobia	o__Methanomicrobiales	f__Methanoculleaceae	g__Methanoculleus	s__Methanoculleus sp002508705	Methanoculleus sp. UBA320	NA
GCA_002509605.1	d__Archaea	p__Methanobacteriota	c__Methanobacteria	o__Methanobacteriales	f__Methanobacteriaceae	g__Methanobrevibacter_B	s__Methanobrevibacter_B boviskoreani	Methanobrevibacter sp. UBA594	NA
GCA_002509625.1	d__Archaea	p__Methanobacteriota	c__Methanobacteria	o__Methanobacteriales	f__Methanobacteriaceae	g__UBA412	s__UBA412 sp002495685	Methanobrevibacter sp. UBA401	NA
GCA_002509645.1	d__Archaea	p__Methanobacteriota	c__Methanobacteria	o__Methanobacteriales	f__Methanobacteriaceae	g__UBA412	s__UBA412 sp002495685	Methanobrevibacter sp. UBA318	NA
GCA_002509655.1	d__Archaea	p__Methanobacteriota	c__Methanobacteria	o__Methanobacteriales	f__Methanobacteriaceae	g__UBA412	s__UBA412 sp002495685	Methanobrevibacter sp. UBA313	NA
GCA_002509665.1	d__Archaea	p__Methanobacteriota	c__Methanobacteria	o__Methanobacteriales	f__Methanobacteriaceae	g__Methanobacterium_D	s__Methanobacterium_D sp002509665	Methanobacterium sp. UBA8	NA
GCA_002509705.1	d__Archaea	p__Methanobacteriota	c__Methanobacteria	o__Methanobacteriales	f__Methanobacteriaceae	g__Methanobacterium	s__Methanobacterium sp002496805	Methanobacterium sp. UBA297	NA
GCA_002509725.1	d__Archaea	p__Methanobacteriota	c__Methanobacteria	o__Methanobacteriales	f__Methanobacteriaceae	g__Methanosphaera	s__Methanosphaera sp11921u	Methanobacteriaceae archaeon UBA541	NA
GCA_002509745.1	d__Archaea	p__Methanobacteriota	c__Methanobacteria	o__Methanobacteriales	f__Methanobacteriaceae	g__UBA349	s__UBA349 sp002509745	Methanobacteriaceae archaeon UBA349	NA
GCA_002572525.1	d__Archaea	p__Halobacteriota	c__Halobacteria	o__Halobacteriales	f__Natrialbaceae	g__Natrinema	s__Natrinema sp002572525	Natrinema sp. CBA1119	strain=CBA1119
GCA_002634415.1	d__Archaea	p__Halobacteriota	c__Methanosarcinia	o__Methanosarcinales	f__Methanoperedenaceae	g__Methanoperedens	s__Methanoperedens sp002487355	Candidatus Methanoperedens sp.	NA
GCA_002683155.1	d__Archaea	p__Thermoplasmatota	c__Poseidoniia	o__Poseidoniales	f__Thalassarchaeaceae	g__MGIIb-O3	s__MGIIb-O3 sp002683155	Euryarchaeota archaeon	NA
GCA_002685215.1	d__Archaea	p__Thermoplasmatota	c__Poseidoniia	o__Poseidoniales	f__Thalassarchaeaceae	g__MGIIb-O2	s__MGIIb-O2 sp002495525	Euryarchaeota archaeon	NA
GCA_002685315.1	d__Archaea	p__Thermoplasmatota	c__Poseidoniia	o__Poseidoniales	f__Thalassarchaeaceae	g__MGIIb-O2	s__MGIIb-O2 sp002685315	Euryarchaeota archaeon	NA
GCA_002685415.1	d__Archaea	p__Thermoplasmatota	c__Poseidoniia	o__Poseidoniales	f__Thalassarchaeaceae	g__MGIIb-O1	s__MGIIb-O1 sp002685415	Euryarchaeota archaeon	NA
GCA_002685735.1	d__Archaea	p__Thermoplasmatota	c__Poseidoniia	o__Poseidoniales	f__Thalassarchaeaceae	g__MGIIb-N1	s__MGIIb-N1 sp002505695	Euryarchaeota archaeon	NA
GCA_002685855.1	d__Archaea	p__Nanoarchaeota	c__Nanoarchaeia	o__Woesearchaeales	f__GCA-2685855	g__GCA-2685855	s__GCA-2685855 sp002685855	Candidatus Woesearchaeota archaeon	NA
GCA_002685895.1	d__Archaea	p__Thermoplasmatota	c__Poseidoniia	o__Poseidoniales	f__Thalassarchaeaceae	g__MGIIb-Q1	s__MGIIb-Q1 sp002685895	Euryarchaeota archaeon	NA
GCA_002686035.1	d__Archaea	p__Thermoplasmatota	c__Poseidoniia	o__Poseidoniales	f__Thalassarchaeaceae	g__MGIIb-O3	s__MGIIb-O3 sp001628485	Euryarchaeota archaeon	NA
GCA_002686195.1	d__Archaea	p__Nanoarchaeota	c__Nanoarchaeia	o__Pacearchaeales	f__GW2011-AR1	g__ARS23	s__ARS23 sp002686195	Candidatus Pacearchaeota archaeon	NA
GCA_002686215.1	d__Archaea	p__Nanoarchaeota	c__Nanoarchaeia	o__UBA10117	f__ARS21	g__ARS21	s__ARS21 sp002686215	Candidatus Woesearchaeota archaeon	NA
GCA_002686295.1	d__Archaea	p__Nanoarchaeota	c__Nanoarchaeia	o__Woesearchaeales	f__GCA-2686295	g__GCA-2686295	s__GCA-2686295 sp002686295	Candidatus Woesearchaeota archaeon	NA
GCA_002686315.1	d__Archaea	p__Nanoarchaeota	c__Nanoarchaeia	o__Woesearchaeales	f__GW2011-AR9	g__UBA11998	s__UBA11998 sp002686315	archaeon	NA
GCA_002686355.1	d__Archaea	p__Nanoarchaeota	c__Nanoarchaeia	o__Pacearchaeales	f__GW2011-AR1	g__ARS1301	s__ARS1301 sp002686355	Candidatus Pacearchaeota archaeon	NA
GCA_002686525.1	d__Archaea	p__Thermoplasmatota	c__Poseidoniia	o__Poseidoniales	f__Thalassarchaeaceae	g__MGIIb-O2	s__MGIIb-O2 sp002686525	Euryarchaeota archaeon	NA
GCA_002686855.1	d__Archaea	p__Nanoarchaeota	c__Nanoarchaeia	o__Woesearchaeales	f__GW2011-AR4	g__GCA-2686855	s__GCA-2686855 sp002686855	Candidatus Woesearchaeota archaeon	NA
GCA_002687075.1	d__Archaea	p__Thermoplasmatota	c__Poseidoniia	o__Poseidoniales	f__Poseidoniaceae	g__MGIIa-L1	s__MGIIa-L1 sp002687075	Euryarchaeota archaeon	NA
GCA_002687185.1	d__Archaea	p__Nanoarchaeota	c__Nanoarchaeia	o__SCGC-AAA011-G17	f__GCA-2687185	g__GCA-2687185	s__GCA-2687185 sp002687185	archaeon	NA
GCA_002687255.1	d__Archaea	p__Nanoarchaeota	c__Nanoarchaeia	o__Pacearchaeales	f__GW2011-AR1	g__ARS50	s__ARS50 sp002687255	Candidatus Pacearchaeota archaeon	NA
GCA_002687275.1	d__Archaea	p__Nanoarchaeota	c__Nanoarchaeia	o__Woesearchaeales	f__ARS49	g__GCA-2687275	s__GCA-2687275 sp002687275	Candidatus Woesearchaeota archaeon	NA
GCA_002687305.1	d__Archaea	p__Thermoplasmatota	c__Poseidoniia	o__Poseidoniales	f__Thalassarchaeaceae	g__MGIIb-O5	s__MGIIb-O5 sp002505775	Euryarchaeota archaeon	NA
GCA_002687355.1	d__Archaea	p__Thermoplasmatota	c__Poseidoniia	o__MGIII	f__CG-Epi1	g__UBA8886	s__UBA8886 sp002687355	Euryarchaeota archaeon	NA
GCA_002687735.1	d__Archaea	p__Iainarchaeota	c__Iainarchaeia	o__Iainarchaeales	f__Iainarchaeaceae	g__UBA493	s__UBA493 sp002687735	Candidatus Diapherotrites archaeon	NA
GCA_002687775.1	d__Archaea	p__Nanoarchaeota	c__Nanoarchaeia	o__Woesearchaeales	f__GW2011-AR9	g__NZBF01	s__NZBF01 sp002687775	Nanoarchaeota archaeon	NA
GCA_002687795.1	d__Archaea	p__Nanoarchaeota	c__Nanoarchaeia	o__Woesearchaeales	f__GCA-2687795	g__GCA-2687795	s__GCA-2687795 sp002687795	Candidatus Woesearchaeota archaeon	NA
GCA_002687815.1	d__Archaea	p__Nanoarchaeota	c__Nanoarchaeia	o__SCGC-AAA011-G17	f__GCA-2687815	g__GCA-2687815	s__GCA-2687815 sp002687815	archaeon	NA
GCA_002687825.1	d__Archaea	p__Nanoarchaeota	c__Nanoarchaeia	o__SCGC-AAA011-G17	f__ARS1403	g__ARS1403	s__ARS1403 sp002687825	Nanoarchaeota archaeon	NA
GCA_002687935.1	d__Archaea	p__Undinarchaeota	c__Undinarchaeia	o__Undinarchaeales	f__Undinarchaeaceae	g__Undinarchaeum	s__Undinarchaeum sp002687935	Euryarchaeota archaeon	NA
GCA_002688015.1	d__Archaea	p__Nanoarchaeota	c__Nanoarchaeia	o__Pacearchaeales	f__GW2011-AR1	g__ARS1309	s__ARS1309 sp002688015	Candidatus Pacearchaeota archaeon	NA
GCA_002688035.1	d__Archaea	p__Iainarchaeota	c__Iainarchaeia	o__Iainarchaeales	f__GCA-2688035	g__GCA-2688035	s__GCA-2688035 sp002688035	Candidatus Diapherotrites archaeon	NA
GCA_002688095.1	d__Archaea	p__Nanoarchaeota	c__Nanoarchaeia	o__SCGC-AAA011-G17	f__GCA-2688095	g__GCA-2688095	s__GCA-2688095 sp002688095	Nanoarchaeota archaeon	NA
GCA_002688165.1	d__Archaea	p__Nanoarchaeota	c__Nanoarchaeia	o__Pacearchaeales	f__GW2011-AR1	g__ARS1285	s__ARS1285 sp002688165	Candidatus Pacearchaeota archaeon	NA
GCA_002688265.1	d__Archaea	p__Nanoarchaeota	c__Nanoarchaeia	o__Woesearchaeales	f__GW2011-AR9	g__GCA-2688265	s__GCA-2688265 sp002688265	archaeon	NA
GCA_002688315.1	d__Archaea	p__Nanoarchaeota	c__Nanoarchaeia	o__Woesearchaeales	f__UBA10216	g__UBA492	s__UBA492 sp002688315	Candidatus Woesearchaeota archaeon	NA
GCA_002688325.1	d__Archaea	p__Nanoarchaeota	c__Nanoarchaeia	o__SCGC-AAA011-G17	f__ARS1178	g__ARS1178	s__ARS1178 sp002688325	archaeon	NA
GCA_002688335.1	d__Archaea	p__Nanoarchaeota	c__Nanoarchaeia	o__Pacearchaeales	f__GW2011-AR1	g__ARS1285	s__ARS1285 sp002688335	Candidatus Pacearchaeota archaeon	NA
GCA_002688355.1	d__Archaea	p__Nanoarchaeota	c__Nanoarchaeia	o__SCGC-AAA011-G17	f__GW2011-AR20	g__GCA-2688355	s__GCA-2688355 sp002688355	archaeon	NA
GCA_002688395.1	d__Archaea	p__Nanoarchaeota	c__Nanoarchaeia	o__SCGC-AAA011-G17	f__ARS1403	g__ARS1403	s__ARS1403 sp002688395	Nanoarchaeota archaeon	NA
GCA_002688415.1	d__Archaea	p__Nanoarchaeota	c__Nanoarchaeia	o__Pacearchaeales	f__GW2011-AR1	g__JAGVXH01	s__JAGVXH01 sp002688415	Candidatus Pacearchaeota archaeon	NA
GCA_002688775.1	d__Archaea	p__Nanoarchaeota	c__Nanoarchaeia	o__Woesearchaeales	f__GW2011-AR4	g__GCA-2688775	s__GCA-2688775 sp002688775	Candidatus Woesearchaeota archaeon	NA
GCA_002688875.1	d__Archaea	p__Nanoarchaeota	c__Nanoarchaeia	o__Pacearchaeales	f__GW2011-AR1	g__ARS1285	s__ARS1285 sp002688875	Candidatus Pacearchaeota archaeon	NA
GCA_002688905.1	d__Archaea	p__Thermoplasmatota	c__Poseidoniia	o__MGIII	f__CG-Epi1	g__UBA8886	s__UBA8886 sp002509165	Euryarchaeota archaeon	NA
GCA_002688925.1	d__Archaea	p__Nanoarchaeota	c__Nanoarchaeia	o__Woesearchaeales	f__GW2011-AR4	g__GCA-2688925	s__GCA-2688925 sp002688925	archaeon	NA
GCA_002688965.1	d__Archaea	p__Aenigmatarchaeota	c__Aenigmatarchaeia	o__GW2011-AR5	f__GCA-2688965	g__GCA-2688965	s__GCA-2688965 sp002688965	archaeon	NA
GCA_002689165.1	d__Archaea	p__Thermoplasmatota	c__Poseidoniia	o__Poseidoniales	f__Thalassarchaeaceae	g__MGIIb-O3	s__MGIIb-O3 sp002172185	Euryarchaeota archaeon	NA
GCA_002689345.1	d__Archaea	p__Thermoplasmatota	c__Poseidoniia	o__Poseidoniales	f__Poseidoniaceae	g__MGIIa-K1	s__MGIIa-K1 sp002689345	Euryarchaeota archaeon	NA
GCA_002689565.1	d__Archaea	p__Thermoplasmatota	c__Poseidoniia	o__Poseidoniales	f__Poseidoniaceae	g__MGIIa-K1	s__MGIIa-K1 sp002689565	Euryarchaeota archaeon	NA
GCA_002689805.1	d__Archaea	p__Thermoplasmatota	c__Poseidoniia	o__Poseidoniales	f__Thalassarchaeaceae	g__MGIIb-O1	s__MGIIb-O1 sp002497895	Euryarchaeota archaeon	NA
GCA_002689985.1	d__Archaea	p__Nanoarchaeota	c__Nanoarchaeia	o__Pacearchaeales	f__GW2011-AR1	g__NP1466	s__NP1466 sp002689985	Candidatus Pacearchaeota archaeon	NA
GCA_002690445.1	d__Archaea	p__Nanoarchaeota	c__Nanoarchaeia	o__Pacearchaeales	f__GW2011-AR1	g__ARS10	s__ARS10 sp002690445	Candidatus Pacearchaeota archaeon	NA
GCA_002690535.1	d__Archaea	p__Thermoproteota	c__Nitrososphaeria	o__Nitrososphaerales	f__Nitrosopumilaceae	g__Nitrosopumilus	s__Nitrosopumilus sp002690535	Nitrosopumilus sp.	NA
GCA_002690785.1	d__Archaea	p__Thermoplasmatota	c__Poseidoniia	o__Poseidoniales	f__Poseidoniaceae	g__Poseidonia	s__Poseidonia sp002726495	Euryarchaeota archaeon	NA
GCA_002690815.1	d__Archaea	p__Thermoplasmatota	c__Poseidoniia	o__Poseidoniales	f__Poseidoniaceae	g__MGIIa-L1	s__MGIIa-L1 sp002687075	Euryarchaeota archaeon	NA
GCA_002692365.2	d__Archaea	p__Thermoplasmatota	c__Poseidoniia	o__Poseidoniales	f__Thalassarchaeaceae	g__MGIIb-N2	s__MGIIb-N2 sp002502625	Euryarchaeota archaeon	NA
GCA_002692465.1	d__Archaea	p__Thermoplasmatota	c__Poseidoniia	o__Poseidoniales	f__Poseidoniaceae	g__MGIIa-I	s__MGIIa-I sp002692465	Euryarchaeota archaeon	NA
GCA_002692625.1	d__Archaea	p__Thermoplasmatota	c__Poseidoniia	o__Poseidoniales	f__Poseidoniaceae	g__Poseidonia	s__Poseidonia sp002725275	Euryarchaeota archaeon	NA
GCA_002692695.1	d__Archaea	p__Thermoplasmatota	c__Poseidoniia	o__Poseidoniales	f__Thalassarchaeaceae	g__Thalassarchaeum	s__Thalassarchaeum sp002501885	Euryarchaeota archaeon	NA
GCA_002692775.1	d__Archaea	p__Thermoplasmatota	c__Poseidoniia	o__Poseidoniales	f__Poseidoniaceae	g__MGIIa-K2	s__MGIIa-K2 sp002719395	Euryarchaeota archaeon	NA
GCA_002693165.1	d__Archaea	p__Thermoproteota	c__Nitrososphaeria	o__Nitrososphaerales	f__UBA57	g__UBA57	s__UBA57 sp002693165	Nitrososphaerota archaeon	NA
GCA_002693705.1	d__Archaea	p__Thermoplasmatota	c__Poseidoniia	o__Poseidoniales	f__Thalassarchaeaceae	g__MGIIb-O5	s__MGIIb-O5 sp002501805	Euryarchaeota archaeon	NA
GCA_002693905.2	d__Archaea	p__Thermoplasmatota	c__Poseidoniia	o__Poseidoniales	f__Thalassarchaeaceae	g__MGIIb-O3	s__MGIIb-O3 sp002716085	Euryarchaeota archaeon	NA
GCA_002693925.2	d__Archaea	p__Thermoplasmatota	c__Poseidoniia	o__Poseidoniales	f__Thalassarchaeaceae	g__MGIIb-N1	s__MGIIb-N1 sp002505695	Euryarchaeota archaeon	NA
GCA_002694235.1	d__Archaea	p__Thermoplasmatota	c__Poseidoniia	o__Poseidoniales	f__Thalassarchaeaceae	g__MGIIb-O3	s__MGIIb-O3 sp002496485	Euryarchaeota archaeon	NA
GCA_002694245.1	d__Archaea	p__Thermoplasmatota	c__Poseidoniia	o__Poseidoniales	f__Poseidoniaceae	g__MGIIa-K1	s__MGIIa-K1 sp002694245	Euryarchaeota archaeon	NA
GCA_002694525.1	d__Archaea	p__Thermoplasmatota	c__Poseidoniia	o__Poseidoniales	f__Poseidoniaceae	g__Poseidonia	s__Poseidonia sp002694525	Euryarchaeota archaeon	NA
GCA_002694585.1	d__Archaea	p__Thermoplasmatota	c__Poseidoniia	o__Poseidoniales	f__Poseidoniaceae	g__MGIIa-L3	s__MGIIa-L3 sp002694585	Euryarchaeota archaeon	NA
GCA_002695145.1	d__Archaea	p__Thermoplasmatota	c__Poseidoniia	o__Poseidoniales	f__Poseidoniaceae	g__MGIIa-K2	s__MGIIa-K2 sp002719395	Euryarchaeota archaeon	NA
GCA_002696315.1	d__Archaea	p__Thermoplasmatota	c__Poseidoniia	o__Poseidoniales	f__Poseidoniaceae	g__MGIIa-I	s__MGIIa-I sp002696315	Euryarchaeota archaeon	NA
GCA_002696505.1	d__Archaea	p__Thermoplasmatota	c__Poseidoniia	o__Poseidoniales	f__Poseidoniaceae	g__MGIIa-L1	s__MGIIa-L1 sp002729095	Euryarchaeota archaeon	NA
GCA_002696565.1	d__Archaea	p__Thermoplasmatota	c__Poseidoniia	o__MGIII	f__CG-Epi1	g__CG-Epi1	s__CG-Epi1 sp002724775	Euryarchaeota archaeon	NA
GCA_002696615.1	d__Archaea	p__Thermoplasmatota	c__Poseidoniia	o__Poseidoniales	f__Thalassarchaeaceae	g__MGIIb-O2	s__MGIIb-O2 sp002686525	Euryarchaeota archaeon	NA
GCA_002696845.1	d__Archaea	p__Thermoplasmatota	c__Poseidoniia	o__Poseidoniales	f__Thalassarchaeaceae	g__MGIIb-N2	s__MGIIb-N2 sp002712285	Euryarchaeota archaeon	NA
GCA_002697065.1	d__Archaea	p__Thermoplasmatota	c__Poseidoniia	o__Poseidoniales	f__Thalassarchaeaceae	g__MGIIb-O3	s__MGIIb-O3 sp002697065	Euryarchaeota archaeon	NA
GCA_002697105.1	d__Archaea	p__Thermoplasmatota	c__Poseidoniia	o__Poseidoniales	f__Thalassarchaeaceae	g__MGIIb-N2	s__MGIIb-N2 sp002697105	Euryarchaeota archaeon	NA
GCA_002697705.1	d__Archaea	p__Thermoplasmatota	c__Poseidoniia	o__Poseidoniales	f__Poseidoniaceae	g__MGIIa-L1	s__MGIIa-L1 sp002697705	Euryarchaeota archaeon	NA
GCA_002698145.1	d__Archaea	p__Thermoplasmatota	c__Poseidoniia	o__Poseidoniales	f__Poseidoniaceae	g__MGIIa-L2	s__MGIIa-L2 sp002698145	Euryarchaeota archaeon	NA
GCA_002698225.1	d__Archaea	p__Thermoplasmatota	c__Poseidoniia	o__Poseidoniales	f__Thalassarchaeaceae	g__Thalassarchaeum	s__Thalassarchaeum sp002698225	Euryarchaeota archaeon	NA
GCA_002698405.1	d__Archaea	p__Thermoplasmatota	c__Poseidoniia	o__Poseidoniales	f__Thalassarchaeaceae	g__MGIIb-O5	s__MGIIb-O5 sp002502095	Euryarchaeota archaeon	NA
GCA_002698885.1	d__Archaea	p__Thermoproteota	c__Nitrososphaeria	o__Nitrososphaerales	f__Nitrosopumilaceae	g__Nitrosopelagicus	s__Nitrosopelagicus sp002698885	Nitrososphaerota archaeon	NA
GCA_002699425.1	d__Archaea	p__Thermoplasmatota	c__Poseidoniia	o__Poseidoniales	f__Poseidoniaceae	g__MGIIa-K2	s__MGIIa-K2 sp002699425	Euryarchaeota archaeon	NA
GCA_002699515.1	d__Archaea	p__Thermoplasmatota	c__Poseidoniia	o__Poseidoniales	f__Poseidoniaceae	g__MGIIa-I	s__MGIIa-I sp002699515	Euryarchaeota archaeon	NA
GCA_002699665.1	d__Archaea	p__Thermoplasmatota	c__Poseidoniia	o__Poseidoniales	f__Thalassarchaeaceae	g__MGIIb-O1	s__MGIIb-O1 sp8684u	Euryarchaeota archaeon	NA
GCA_002700955.2	d__Archaea	p__Thermoplasmatota	c__Poseidoniia	o__Poseidoniales	f__Thalassarchaeaceae	g__MGIIb-N2	s__MGIIb-N2 sp002713585	Euryarchaeota archaeon	NA
GCA_002701025.1	d__Archaea	p__Thermoplasmatota	c__Poseidoniia	o__Poseidoniales	f__Poseidoniaceae	g__MGIIa-L1	s__MGIIa-L1 sp002172355	Euryarchaeota archaeon	NA
GCA_002701145.1	d__Archaea	p__Thermoplasmatota	c__Poseidoniia	o__Poseidoniales	f__Poseidoniaceae	g__MGIIa-K1	s__MGIIa-K1 sp002701145	Euryarchaeota archaeon	NA
GCA_002701965.1	d__Archaea	p__Thermoplasmatota	c__Poseidoniia	o__Poseidoniales	f__Thalassarchaeaceae	g__MGIIb-P	s__MGIIb-P sp002701965	Euryarchaeota archaeon	NA
GCA_002702035.1	d__Archaea	p__Thermoplasmatota	c__Poseidoniia	o__Poseidoniales	f__Poseidoniaceae	g__MGIIa-L2	s__MGIIa-L2 sp002499195	Euryarchaeota archaeon	NA
GCA_002702715.1	d__Archaea	p__Thermoplasmatota	c__Poseidoniia	o__Poseidoniales	f__Thalassarchaeaceae	g__MGIIb-O5	s__MGIIb-O5 sp002730095	Euryarchaeota archaeon	NA
GCA_002702945.1	d__Archaea	p__Thermoplasmatota	c__Poseidoniia	o__Poseidoniales	f__Poseidoniaceae	g__MGIIa-L1	s__MGIIa-L1 sp002702945	Euryarchaeota archaeon	NA
GCA_002702985.1	d__Archaea	p__Thermoplasmatota	c__Poseidoniia	o__Poseidoniales	f__Thalassarchaeaceae	g__MGIIb-N2	s__MGIIb-N2 sp002702985	Euryarchaeota archaeon	NA
GCA_002703075.2	d__Archaea	p__Thermoplasmatota	c__Poseidoniia	o__Poseidoniales	f__Poseidoniaceae	g__MGIIa-L2	s__MGIIa-L2 sp002722615	Euryarchaeota archaeon	NA
GCA_002703125.1	d__Archaea	p__Thermoplasmatota	c__Poseidoniia	o__Poseidoniales	f__Thalassarchaeaceae	g__MGIIb-O2	s__MGIIb-O2 sp002498985	Euryarchaeota archaeon	NA
GCA_002703295.1	d__Archaea	p__Thermoplasmatota	c__Poseidoniia	o__Poseidoniales	f__Poseidoniaceae	g__Poseidonia	s__Poseidonia sp002725275	Euryarchaeota archaeon	NA
GCA_002704515.1	d__Archaea	p__Thermoplasmatota	c__Poseidoniia	o__Poseidoniales	f__Poseidoniaceae	g__Poseidonia	s__Poseidonia sp002704515	Euryarchaeota archaeon	NA
GCA_002704585.1	d__Archaea	p__Thermoplasmatota	c__Poseidoniia	o__Poseidoniales	f__Thalassarchaeaceae	g__MGIIb-O5	s__MGIIb-O5 sp002506825	Euryarchaeota archaeon	NA
GCA_002704705.1	d__Archaea	p__Thermoplasmatota	c__Poseidoniia	o__Poseidoniales	f__Thalassarchaeaceae	g__MGIIb-O3	s__MGIIb-O3 sp002457145	Euryarchaeota archaeon	NA
GCA_002706065.1	d__Archaea	p__Thermoplasmatota	c__Poseidoniia	o__Poseidoniales	f__Poseidoniaceae	g__MGIIa-L2	s__MGIIa-L2 sp002706065	Euryarchaeota archaeon	NA
GCA_002706615.1	d__Archaea	p__Thermoplasmatota	c__Poseidoniia	o__Poseidoniales	f__Poseidoniaceae	g__MGIIa-K1	s__MGIIa-K1 sp002706615	Euryarchaeota archaeon	NA
GCA_002706635.1	d__Archaea	p__Thermoplasmatota	c__Poseidoniia	o__Poseidoniales	f__Thalassarchaeaceae	g__MGIIb-O5	s__MGIIb-O5 sp002504435	Euryarchaeota archaeon	NA
GCA_002707335.2	d__Archaea	p__Thermoplasmatota	c__Poseidoniia	o__Poseidoniales	f__Poseidoniaceae	g__MGIIa-K1	s__MGIIa-K1 sp002707335	Euryarchaeota archaeon	NA
GCA_002708015.1	d__Archaea	p__Thermoplasmatota	c__Poseidoniia	o__Poseidoniales	f__Thalassarchaeaceae	g__MGIIb-N2	s__MGIIb-N2 sp002708015	Euryarchaeota archaeon	NA
GCA_002708385.1	d__Archaea	p__Thermoplasmatota	c__Poseidoniia	o__Poseidoniales	f__Thalassarchaeaceae	g__MGIIb-O1	s__MGIIb-O1 sp002708385	Euryarchaeota archaeon	NA
GCA_002708695.1	d__Archaea	p__Thermoplasmatota	c__Poseidoniia	o__Poseidoniales	f__Thalassarchaeaceae	g__MGIIb-N2	s__MGIIb-N2 sp002708695	Euryarchaeota archaeon	NA
GCA_002709285.1	d__Archaea	p__Thermoproteota	c__Nitrososphaeria	o__Nitrososphaerales	f__Nitrosopumilaceae	g__Nitrosopelagicus	s__Nitrosopelagicus sp902578515	Nitrososphaerota archaeon	NA
GCA_002709705.1	d__Archaea	p__Thermoplasmatota	c__Poseidoniia	o__Poseidoniales	f__Poseidoniaceae	g__MGIIa-K1	s__MGIIa-K1 sp002709705	Euryarchaeota archaeon	NA
GCA_002710015.1	d__Archaea	p__Thermoplasmatota	c__Poseidoniia	o__Poseidoniales	f__Poseidoniaceae	g__MGIIa-K1	s__MGIIa-K1 sp002710015	Euryarchaeota archaeon	NA
GCA_002710035.1	d__Archaea	p__Thermoplasmatota	c__Poseidoniia	o__MGIII	f__CG-Epi1	g__CG-Epi1	s__CG-Epi1 sp002724775	Euryarchaeota archaeon	NA
GCA_002710205.1	d__Archaea	p__Thermoplasmatota	c__Poseidoniia	o__Poseidoniales	f__Poseidoniaceae	g__MGIIa-K1	s__MGIIa-K1 sp002710205	Euryarchaeota archaeon	NA
GCA_002711575.1	d__Archaea	p__Thermoplasmatota	c__Poseidoniia	o__Poseidoniales	f__Thalassarchaeaceae	g__MGIIb-P	s__MGIIb-P sp002498455	Euryarchaeota archaeon	NA
GCA_002711795.1	d__Archaea	p__Thermoplasmatota	c__Poseidoniia	o__Poseidoniales	f__Thalassarchaeaceae	g__MGIIb-O2	s__MGIIb-O2 sp002504905	Euryarchaeota archaeon	NA
GCA_002711985.1	d__Archaea	p__Thermoplasmatota	c__Poseidoniia	o__Poseidoniales	f__Thalassarchaeaceae	g__MGIIb-O5	s__MGIIb-O5 sp002718995	Euryarchaeota archaeon	NA
GCA_002712285.1	d__Archaea	p__Thermoplasmatota	c__Poseidoniia	o__Poseidoniales	f__Thalassarchaeaceae	g__MGIIb-N2	s__MGIIb-N2 sp002712285	Euryarchaeota archaeon	NA
GCA_002712495.1	d__Archaea	p__Thermoplasmatota	c__Poseidoniia	o__Poseidoniales	f__Poseidoniaceae	g__MGIIa-L3	s__MGIIa-L3 sp002496845	Euryarchaeota archaeon	NA
GCA_002712575.1	d__Archaea	p__Thermoplasmatota	c__Poseidoniia	o__Poseidoniales	f__Thalassarchaeaceae	g__MGIIb-O3	s__MGIIb-O3 sp002712575	Euryarchaeota archaeon	NA
GCA_002712645.1	d__Archaea	p__Thermoplasmatota	c__Poseidoniia	o__Poseidoniales	f__Thalassarchaeaceae	g__MGIIb-N1	s__MGIIb-N1 sp002712645	Euryarchaeota archaeon	NA
GCA_002713185.1	d__Archaea	p__Thermoplasmatota	c__Poseidoniia	o__Poseidoniales	f__Thalassarchaeaceae	g__MGIIb-O3	s__MGIIb-O3 sp002713185	Euryarchaeota archaeon	NA
GCA_002713205.1	d__Archaea	p__Thermoproteota	c__Nitrososphaeria	o__Nitrososphaerales	f__UBA57	g__UBA57	s__UBA57 sp002713205	Nitrososphaerota archaeon	NA
GCA_002713325.1	d__Archaea	p__Thermoproteota	c__Nitrososphaeria	o__Nitrososphaerales	f__UBA213	g__UBA213	s__UBA213 sp002713325	Nitrososphaerota archaeon	NA
GCA_002713585.1	d__Archaea	p__Thermoplasmatota	c__Poseidoniia	o__Poseidoniales	f__Thalassarchaeaceae	g__MGIIb-N2	s__MGIIb-N2 sp002713585	Euryarchaeota archaeon	NA
GCA_002713925.1	d__Archaea	p__Thermoplasmatota	c__Poseidoniia	o__Poseidoniales	f__Thalassarchaeaceae	g__MGIIb-O3	s__MGIIb-O3 sp002725315	Euryarchaeota archaeon	NA
GCA_002714305.1	d__Archaea	p__Thermoplasmatota	c__Poseidoniia	o__Poseidoniales	f__Poseidoniaceae	g__Poseidonia	s__Poseidonia sp002714305	Euryarchaeota archaeon	NA
GCA_002714545.1	d__Archaea	p__Thermoplasmatota	c__Poseidoniia	o__Poseidoniales	f__Poseidoniaceae	g__MGIIa-L2	s__MGIIa-L2 sp002698145	Euryarchaeota archaeon	NA
GCA_002714605.1	d__Archaea	p__Thermoplasmatota	c__Poseidoniia	o__Poseidoniales	f__Thalassarchaeaceae	g__MGIIb-O2	s__MGIIb-O2 sp002497245	Euryarchaeota archaeon	NA
GCA_002714745.1	d__Archaea	p__Thermoplasmatota	c__Poseidoniia	o__Poseidoniales	f__Thalassarchaeaceae	g__Thalassarchaeum	s__Thalassarchaeum sp002714745	Euryarchaeota archaeon	NA
GCA_002715245.1	d__Archaea	p__Thermoplasmatota	c__Poseidoniia	o__Poseidoniales	f__Poseidoniaceae	g__MGIIa-L2	s__MGIIa-L2 sp002499195	Euryarchaeota archaeon	NA
GCA_002715325.1	d__Archaea	p__Thermoplasmatota	c__Poseidoniia	o__Poseidoniales	f__Thalassarchaeaceae	g__MGIIb-O2	s__MGIIb-O2 sp002686525	Euryarchaeota archaeon	NA
GCA_002715545.1	d__Archaea	p__Thermoplasmatota	c__Poseidoniia	o__Poseidoniales	f__SP79	g__SP79	s__SP79 sp002715545	Euryarchaeota archaeon	NA
GCA_002715725.1	d__Archaea	p__Thermoplasmatota	c__Poseidoniia	o__Poseidoniales	f__Poseidoniaceae	g__MGIIa-K1	s__MGIIa-K1 sp002715725	Euryarchaeota archaeon	NA
GCA_002716085.1	d__Archaea	p__Thermoplasmatota	c__Poseidoniia	o__Poseidoniales	f__Thalassarchaeaceae	g__MGIIb-O3	s__MGIIb-O3 sp002716085	Euryarchaeota archaeon	NA
GCA_002716785.1	d__Archaea	p__Thermoplasmatota	c__Poseidoniia	o__Poseidoniales	f__Poseidoniaceae	g__Poseidonia	s__Poseidonia sp002495645	Euryarchaeota archaeon	NA
GCA_002717165.1	d__Archaea	p__Thermoproteota	c__Nitrososphaeria	o__Nitrososphaerales	f__UBA57	g__UBA57	s__UBA57 sp002495905	Nitrososphaerota archaeon	NA
GCA_002717835.1	d__Archaea	p__Thermoplasmatota	c__Poseidoniia	o__Poseidoniales	f__Thalassarchaeaceae	g__MGIIb-N1	s__MGIIb-N1 sp002717835	Euryarchaeota archaeon	NA
GCA_002718195.1	d__Archaea	p__Thermoplasmatota	c__Poseidoniia	o__Poseidoniales	f__Poseidoniaceae	g__MGIIa-L4	s__MGIIa-L4 sp002718195	Euryarchaeota archaeon	NA
GCA_002718215.1	d__Archaea	p__Thermoplasmatota	c__Poseidoniia	o__Poseidoniales	f__Thalassarchaeaceae	g__MGIIb-N2	s__MGIIb-N2 sp002718215	Euryarchaeota archaeon	NA
GCA_002718575.1	d__Archaea	p__Thermoplasmatota	c__Poseidoniia	o__Poseidoniales	f__Thalassarchaeaceae	g__Thalassarchaeum	s__Thalassarchaeum sp002503055	Euryarchaeota archaeon	NA
GCA_002718695.1	d__Archaea	p__Thermoplasmatota	c__Poseidoniia	o__Poseidoniales	f__Thalassarchaeaceae	g__MGIIb-O3	s__MGIIb-O3 sp002718695	Euryarchaeota archaeon	NA
GCA_002718915.1	d__Archaea	p__Thermoplasmatota	c__Poseidoniia	o__MGIII	f__CG-Epi1	g__CG-Epi1	s__CG-Epi1 sp002718915	Euryarchaeota archaeon	NA
GCA_002718975.1	d__Archaea	p__Thermoplasmatota	c__Poseidoniia	o__Poseidoniales	f__Thalassarchaeaceae	g__MGIIb-N1	s__MGIIb-N1 sp002505455	Euryarchaeota archaeon	NA
GCA_002718995.2	d__Archaea	p__Thermoplasmatota	c__Poseidoniia	o__Poseidoniales	f__Thalassarchaeaceae	g__MGIIb-O5	s__MGIIb-O5 sp002718995	Euryarchaeota archaeon	NA
GCA_002719015.1	d__Archaea	p__Thermoplasmatota	c__Poseidoniia	o__Poseidoniales	f__Poseidoniaceae	g__MGIIa-K1	s__MGIIa-K1 sp002498185	Euryarchaeota archaeon	NA
GCA_002719355.1	d__Archaea	p__Thermoplasmatota	c__Poseidoniia	o__Poseidoniales	f__Thalassarchaeaceae	g__MGIIb-P	s__MGIIb-P sp002505685	Euryarchaeota archaeon	NA
GCA_002719395.1	d__Archaea	p__Thermoplasmatota	c__Poseidoniia	o__Poseidoniales	f__Poseidoniaceae	g__MGIIa-K2	s__MGIIa-K2 sp002719395	Euryarchaeota archaeon	NA
GCA_002719475.1	d__Archaea	p__Thermoplasmatota	c__Poseidoniia	o__Poseidoniales	f__Poseidoniaceae	g__UBA226	s__UBA226 sp002719475	Euryarchaeota archaeon	NA
GCA_002719615.1	d__Archaea	p__Thermoplasmatota	c__Poseidoniia	o__Poseidoniales	f__Thalassarchaeaceae	g__MGIIb-O3	s__MGIIb-O3 sp002719615	Euryarchaeota archaeon	NA
GCA_002719635.1	d__Archaea	p__Thermoplasmatota	c__Poseidoniia	o__Poseidoniales	f__Thalassarchaeaceae	g__MGIIb-O5	s__MGIIb-O5 sp002497985	Euryarchaeota archaeon	NA
GCA_002719815.1	d__Archaea	p__Thermoplasmatota	c__Poseidoniia	o__Poseidoniales	f__Poseidoniaceae	g__MGIIa-L2	s__MGIIa-L2 sp002719815	Euryarchaeota archaeon	NA
GCA_002720055.1	d__Archaea	p__Thermoplasmatota	c__Poseidoniia	o__Poseidoniales	f__Thalassarchaeaceae	g__MGIIb-O3	s__MGIIb-O3 sp002720055	Euryarchaeota archaeon	NA
GCA_002720095.2	d__Archaea	p__Thermoplasmatota	c__Poseidoniia	o__Poseidoniales	f__Poseidoniaceae	g__MGIIa-I	s__MGIIa-I sp002720095	Euryarchaeota archaeon	NA
GCA_002720115.1	d__Archaea	p__Thermoplasmatota	c__Poseidoniia	o__Poseidoniales	f__Poseidoniaceae	g__MGIIa-K1	s__MGIIa-K1 sp002720115	Euryarchaeota archaeon	NA
GCA_002720275.1	d__Archaea	p__Thermoplasmatota	c__Poseidoniia	o__Poseidoniales	f__Poseidoniaceae	g__MGIIa-I	s__MGIIa-I sp002720275	Euryarchaeota archaeon	NA
GCA_002721085.1	d__Archaea	p__Thermoplasmatota	c__Poseidoniia	o__Poseidoniales	f__Poseidoniaceae	g__MGIIa-L1	s__MGIIa-L1 sp9354u	Euryarchaeota archaeon	NA
GCA_002722075.1	d__Archaea	p__Thermoplasmatota	c__Poseidoniia	o__Poseidoniales	f__Thalassarchaeaceae	g__MGIIb-N1	s__MGIIb-N1 sp002499585	Euryarchaeota archaeon	NA
GCA_002722135.1	d__Archaea	p__Thermoplasmatota	c__Poseidoniia	o__Poseidoniales	f__Poseidoniaceae	g__MGIIa-L3	s__MGIIa-L3 sp002722135	Euryarchaeota archaeon	NA
GCA_002722595.1	d__Archaea	p__Thermoplasmatota	c__Poseidoniia	o__Poseidoniales	f__Thalassarchaeaceae	g__MGIIb-P	s__MGIIb-P sp002722595	Euryarchaeota archaeon	NA
GCA_002722615.1	d__Archaea	p__Thermoplasmatota	c__Poseidoniia	o__Poseidoniales	f__Poseidoniaceae	g__MGIIa-L2	s__MGIIa-L2 sp002722615	Euryarchaeota archaeon	NA
GCA_002722695.1	d__Archaea	p__Thermoplasmatota	c__Poseidoniia	o__Poseidoniales	f__Poseidoniaceae	g__Poseidonia	s__Poseidonia sp002722695	Euryarchaeota archaeon	NA
GCA_002722735.1	d__Archaea	p__Thermoplasmatota	c__Poseidoniia	o__Poseidoniales	f__Thalassarchaeaceae	g__MGIIb-O3	s__MGIIb-O3 sp002722735	Euryarchaeota archaeon	NA
GCA_002723045.1	d__Archaea	p__Thermoplasmatota	c__Poseidoniia	o__Poseidoniales	f__Thalassarchaeaceae	g__MGIIb-O3	s__MGIIb-O3 sp002723045	Euryarchaeota archaeon	NA
GCA_002723635.1	d__Archaea	p__Thermoplasmatota	c__Poseidoniia	o__Poseidoniales	f__Poseidoniaceae	g__MGIIa-L3	s__MGIIa-L3 sp002723635	Euryarchaeota archaeon	NA
GCA_002724535.1	d__Archaea	p__Thermoplasmatota	c__Poseidoniia	o__Poseidoniales	f__Thalassarchaeaceae	g__MGIIb-O5	s__MGIIb-O5 sp002505775	Euryarchaeota archaeon	NA
GCA_002724655.1	d__Archaea	p__Thermoplasmatota	c__Poseidoniia	o__Poseidoniales	f__Thalassarchaeaceae	g__Thalassarchaeum	s__Thalassarchaeum sp002501885	Euryarchaeota archaeon	NA
GCA_002724775.1	d__Archaea	p__Thermoplasmatota	c__Poseidoniia	o__MGIII	f__CG-Epi1	g__CG-Epi1	s__CG-Epi1 sp002724775	Euryarchaeota archaeon	NA
GCA_002724795.1	d__Archaea	p__Thermoproteota	c__Nitrososphaeria	o__Nitrososphaerales	f__Nitrosopumilaceae	g__Nitrosopelagicus	s__Nitrosopelagicus sp001627235	Candidatus Nitrosopelagicus sp.	NA
GCA_002724815.1	d__Archaea	p__Thermoplasmatota	c__Poseidoniia	o__Poseidoniales	f__Thalassarchaeaceae	g__MGIIb-P	s__MGIIb-P sp002724815	Euryarchaeota archaeon	NA
GCA_002725245.1	d__Archaea	p__Thermoplasmatota	c__Poseidoniia	o__Poseidoniales	f__Thalassarchaeaceae	g__MGIIb-O5	s__MGIIb-O5 sp002499345	Euryarchaeota archaeon	NA
GCA_002725275.1	d__Archaea	p__Thermoplasmatota	c__Poseidoniia	o__Poseidoniales	f__Poseidoniaceae	g__Poseidonia	s__Poseidonia sp002725275	Euryarchaeota archaeon	NA
GCA_002725315.1	d__Archaea	p__Thermoplasmatota	c__Poseidoniia	o__Poseidoniales	f__Thalassarchaeaceae	g__MGIIb-O3	s__MGIIb-O3 sp002725315	Euryarchaeota archaeon	NA
GCA_002725475.1	d__Archaea	p__Thermoplasmatota	c__Poseidoniia	o__Poseidoniales	f__Thalassarchaeaceae	g__MGIIb-Q1	s__MGIIb-Q1 sp002725475	Euryarchaeota archaeon	NA
GCA_002725495.1	d__Archaea	p__Nanoarchaeota	c__Nanoarchaeia	o__UBA10117	f__ARS21	g__ARS21	s__ARS21 sp002725495	Candidatus Woesearchaeota archaeon	NA
GCA_002725535.1	d__Archaea	p__Thermoplasmatota	c__Poseidoniia	o__Poseidoniales	f__Thalassarchaeaceae	g__MGIIb-O3	s__MGIIb-O3 sp001628485	Euryarchaeota archaeon	NA
GCA_002726275.1	d__Archaea	p__Thermoplasmatota	c__Poseidoniia	o__Poseidoniales	f__Thalassarchaeaceae	g__MGIIb-O5	s__MGIIb-O5 sp002726275	Euryarchaeota archaeon	NA
GCA_002726395.1	d__Archaea	p__Thermoplasmatota	c__Poseidoniia	o__Poseidoniales	f__Poseidoniaceae	g__MGIIa-L1	s__MGIIa-L1 sp002726395	Euryarchaeota archaeon	NA
GCA_002726495.1	d__Archaea	p__Thermoplasmatota	c__Poseidoniia	o__Poseidoniales	f__Poseidoniaceae	g__Poseidonia	s__Poseidonia sp002726495	Euryarchaeota archaeon	NA
GCA_002726845.1	d__Archaea	p__Thermoplasmatota	c__Poseidoniia	o__Poseidoniales	f__Poseidoniaceae	g__MGIIa-L2	s__MGIIa-L2 sp002726845	Euryarchaeota archaeon	NA
GCA_002726865.1	d__Archaea	p__Thermoproteota	c__Bathyarchaeia	o__TCS64	f__TCS64	g__GCA-2726865	s__GCA-2726865 sp002726865	Candidatus Bathyarchaeota archaeon	NA
GCA_002727095.1	d__Archaea	p__Halobacteriota	c__Halobacteria	o__Halobacteriales	f__Haloferacaceae	g__Halorubrum	s__Halorubrum ezzemoulense	Halorubrum sp. C191	strain=C191
GCA_002727125.1	d__Archaea	p__Halobacteriota	c__Halobacteria	o__Halobacteriales	f__Haloferacaceae	g__Halorubrum	s__Halorubrum persicum	Halorubrum persicum	strain=C49
GCA_002727275.1	d__Archaea	p__Thermoplasmatota	c__Poseidoniia	o__Poseidoniales	f__Thalassarchaeaceae	g__Thalassarchaeum	s__Thalassarchaeum sp002727275	Euryarchaeota archaeon	NA
GCA_002727485.1	d__Archaea	p__Thermoplasmatota	c__Poseidoniia	o__Poseidoniales	f__Poseidoniaceae	g__MGIIa-L1	s__MGIIa-L1 sp002727485	Euryarchaeota archaeon	NA
GCA_002727515.1	d__Archaea	p__Thermoplasmatota	c__Poseidoniia	o__Poseidoniales	f__Poseidoniaceae	g__MGIIa-K1	s__MGIIa-K1 sp002727515	Euryarchaeota archaeon	NA
GCA_002727675.1	d__Archaea	p__Thermoplasmatota	c__Poseidoniia	o__Poseidoniales	f__Thalassarchaeaceae	g__MGIIb-Q1	s__MGIIb-Q1 sp002727675	Thermoplasmata archaeon	NA
GCA_002727695.1	d__Archaea	p__Thermoplasmatota	c__Poseidoniia	o__Poseidoniales	f__Poseidoniaceae	g__MGIIa-K1	s__MGIIa-K1 sp002727695	Euryarchaeota archaeon	NA
GCA_002728035.1	d__Archaea	p__Thermoplasmatota	c__Poseidoniia	o__Poseidoniales	f__Poseidoniaceae	g__Poseidonia	s__Poseidonia sp002728035	Euryarchaeota archaeon	NA
GCA_002728275.1	d__Archaea	p__Asgardarchaeota	c__Heimdallarchaeia	o__UBA460	f__Kariarchaeaceae	g__Kariarchaeum	s__Kariarchaeum pelagium	Candidatus Heimdallarchaeota archaeon	NA
GCA_002728565.1	d__Archaea	p__Thermoplasmatota	c__Poseidoniia	o__Poseidoniales	f__Thalassarchaeaceae	g__MGIIb-O3	s__MGIIb-O3 sp002728565	Euryarchaeota archaeon	NA
GCA_002728595.1	d__Archaea	p__Thermoplasmatota	c__Poseidoniia	o__Poseidoniales	f__Poseidoniaceae	g__MGIIa-K2	s__MGIIa-K2 sp002719395	Euryarchaeota archaeon	NA
GCA_002728885.1	d__Archaea	p__Thermoplasmatota	c__Poseidoniia	o__Poseidoniales	f__Thalassarchaeaceae	g__MGIIb-N1	s__MGIIb-N1 sp002505695	Euryarchaeota archaeon	NA
GCA_002728975.1	d__Archaea	p__Thermoplasmatota	c__Poseidoniia	o__Poseidoniales	f__Thalassarchaeaceae	g__MGIIb-O1	s__MGIIb-O1 sp002497025	Euryarchaeota archaeon	NA
GCA_002729095.1	d__Archaea	p__Thermoplasmatota	c__Poseidoniia	o__Poseidoniales	f__Poseidoniaceae	g__MGIIa-L1	s__MGIIa-L1 sp002729095	Euryarchaeota archaeon	NA
GCA_002729355.1	d__Archaea	p__Thermoplasmatota	c__Poseidoniia	o__Poseidoniales	f__Thalassarchaeaceae	g__MGIIb-N1	s__MGIIb-N1 sp002504845	Euryarchaeota archaeon	NA
GCA_002730005.1	d__Archaea	p__Thermoplasmatota	c__Poseidoniia	o__Poseidoniales	f__Poseidoniaceae	g__MGIIa-L1	s__MGIIa-L1 sp002499545	Euryarchaeota archaeon	NA
GCA_002730095.1	d__Archaea	p__Thermoplasmatota	c__Poseidoniia	o__Poseidoniales	f__Thalassarchaeaceae	g__MGIIb-O5	s__MGIIb-O5 sp002730095	Euryarchaeota archaeon	NA
GCA_002730325.1	d__Archaea	p__Thermoproteota	c__Nitrososphaeria	o__Nitrososphaerales	f__Nitrosopumilaceae	g__Nitrosopumilus	s__Nitrosopumilus sp002730325	Nitrososphaerota archaeon	NA
GCA_002730775.1	d__Archaea	p__Thermoplasmatota	c__Poseidoniia	o__Poseidoniales	f__Thalassarchaeaceae	g__MGIIb-O2	s__MGIIb-O2 sp002498985	Euryarchaeota archaeon	NA
GCA_002731115.1	d__Archaea	p__Nanoarchaeota	c__Nanoarchaeia	o__Pacearchaeales	f__GW2011-AR1	g__NP1466	s__NP1466 sp002731115	Candidatus Pacearchaeota archaeon	NA
GCA_002731195.1	d__Archaea	p__Thermoplasmatota	c__Poseidoniia	o__Poseidoniales	f__Thalassarchaeaceae	g__MGIIb-O3	s__MGIIb-O3 sp002731195	Euryarchaeota archaeon	NA
GCA_002731395.1	d__Archaea	p__Thermoplasmatota	c__Poseidoniia	o__Poseidoniales	f__Poseidoniaceae	g__MGIIa-L3	s__MGIIa-L3 sp002731395	Euryarchaeota archaeon	NA
GCA_002731465.1	d__Archaea	p__Thermoplasmatota	c__Poseidoniia	o__Poseidoniales	f__Thalassarchaeaceae	g__MGIIb-O3	s__MGIIb-O3 sp002722735	Euryarchaeota archaeon	NA
GCA_002731655.1	d__Archaea	p__Thermoplasmatota	c__Poseidoniia	o__MGIII	f__CG-Epi1	g__UBA8886	s__UBA8886 sp002731655	Euryarchaeota archaeon	NA
GCA_002731905.1	d__Archaea	p__Thermoplasmatota	c__Poseidoniia	o__MGIII	f__CG-Epi1	g__UBA8886	s__UBA8886 sp002731905	Euryarchaeota archaeon	NA
GCA_002737445.1	d__Archaea	p__Thermoproteota	c__Nitrososphaeria	o__Nitrososphaerales	f__Nitrosopumilaceae	g__Nitrosarchaeum	s__Nitrosarchaeum sp002737445	Nitrosarchaeum sp.	NA
GCA_002737455.1	d__Archaea	p__Thermoproteota	c__Nitrososphaeria	o__Nitrososphaerales	f__Nitrosopumilaceae	g__Nitrosopumilus	s__Nitrosopumilus limneticus	Nitrososphaerota archaeon	NA
GCA_002761295.1	d__Archaea	p__Halobacteriota	c__Methanosarcinia	o__Methanosarcinales	f__Methanosarcinaceae	g__Methanohalophilus	s__Methanohalophilus portucalensis	Methanohalophilus portucalensis	strain=FDF-1T
GCA_002762655.1	d__Archaea	p__Altiarchaeota	c__Altiarchaeia	o__Altiarchaeales	f__Altiarchaeaceae	g__Altiarchaeum	s__Altiarchaeum hamiconexum	Candidatus Altarchaeum sp. CG12_big_fil_rev_8_21_14_0_65_33_22	NA
GCA_002762665.1	d__Archaea	p__Huberarchaeota	c__Huberarchaeia	o__Huberarchaeales	f__Huberarchaeaceae	g__Huberarchaeum	s__Huberarchaeum crystalense	Candidatus Huberarchaeum crystalense	NA
GCA_002762705.1	d__Archaea	p__Nanoarchaeota	c__Nanoarchaeia	o__Woesearchaeales	f__CG08-08-20-14	g__CG08-08-20-14	s__CG08-08-20-14 sp002762705	Candidatus Woesearchaeota archaeon CG11_big_fil_rev_8_21_14_0_20_43_8	NA
GCA_002762735.1	d__Archaea	p__Nanoarchaeota	c__Nanoarchaeia	o__Pacearchaeales	f__GW2011-AR1	g__GW2011-AR1	s__GW2011-AR1 sp002762735	Candidatus Pacearchaeota archaeon CG11_big_fil_rev_8_21_14_0_20_30_13	NA
GCA_002762785.1	d__Archaea	p__Nanoarchaeota	c__Nanoarchaeia	o__Woesearchaeales	f__GW2011-AR9	g__PCXY01	s__PCXY01 sp002762785	Candidatus Woesearchaeota archaeon CG10_big_fil_rev_8_21_14_0_10_45_16	NA
GCA_002762795.1	d__Archaea	p__Nanoarchaeota	c__Nanoarchaeia	o__Woesearchaeales	f__ARS49	g__1-14-0-10-37-12	s__1-14-0-10-37-12 sp002762795	Candidatus Woesearchaeota archaeon CG10_big_fil_rev_8_21_14_0_10_37_12	NA
GCA_002762845.1	d__Archaea	p__Nanoarchaeota	c__Nanoarchaeia	o__Woesearchaeales	f__GW2011-AR9	g__PCYB01	s__PCYB01 sp002762845	Candidatus Woesearchaeota archaeon CG10_big_fil_rev_8_21_14_0_10_36_11	NA
GCA_002762865.1	d__Archaea	p__Nanoarchaeota	c__Nanoarchaeia	o__Woesearchaeales	f__CG1-02-33-12	g__CG1-02-33-12	s__CG1-02-33-12 sp002762865	Candidatus Woesearchaeota archaeon CG10_big_fil_rev_8_21_14_0_10_33_12	NA
GCA_002762915.1	d__Archaea	p__Nanoarchaeota	c__Nanoarchaeia	o__Woesearchaeales	f__21-14-0-10-32-9	g__21-14-0-10-32-9	s__21-14-0-10-32-9 sp002762915	Candidatus Woesearchaeota archaeon CG10_big_fil_rev_8_21_14_0_10_32_9	NA
GCA_002762975.1	d__Archaea	p__Iainarchaeota	c__Iainarchaeia	o__Iainarchaeales	f__Iainarchaeaceae	g__PCWY01	s__PCWY01 sp002762975	Candidatus Diapherotrites archaeon CG11_big_fil_rev_8_21_14_0_20_37_9	NA
GCA_002762985.1	d__Archaea	p__Nanoarchaeota	c__Nanoarchaeia	o__Woesearchaeales	f__UBA12501	g__1-14-0-10-44-13	s__1-14-0-10-44-13 sp002762985	Candidatus Woesearchaeota archaeon CG10_big_fil_rev_8_21_14_0_10_44_13	NA
GCA_002763025.1	d__Archaea	p__Nanoarchaeota	c__Nanoarchaeia	o__Woesearchaeales	f__GW2011-AR9	g__1-14-0-10-32-24	s__1-14-0-10-32-24 sp002763025	Candidatus Woesearchaeota archaeon CG10_big_fil_rev_8_21_14_0_10_32_24	NA
GCA_002763035.1	d__Archaea	p__Nanoarchaeota	c__Nanoarchaeia	o__Pacearchaeales	f__GW2011-AR1	g__PFDC01	s__PFDC01 sp002763035	Candidatus Pacearchaeota archaeon CG10_big_fil_rev_8_21_14_0_10_35_13	NA
GCA_002763075.1	d__Archaea	p__Nanoarchaeota	c__Nanoarchaeia	o__Pacearchaeales	f__GW2011-AR1	g__1-14-0-10-34-76	s__1-14-0-10-34-76 sp002763075	Candidatus Pacearchaeota archaeon CG10_big_fil_rev_8_21_14_0_10_34_76	NA
GCA_002763085.1	d__Archaea	p__Nanoarchaeota	c__Nanoarchaeia	o__Pacearchaeales	f__GW2011-AR1	g__PFCY01	s__PFCY01 sp002763085	Candidatus Pacearchaeota archaeon CG10_big_fil_rev_8_21_14_0_10_32_14	NA
GCA_002763105.1	d__Archaea	p__Nanoarchaeota	c__Nanoarchaeia	o__Pacearchaeales	f__GW2011-AR1	g__MNVX01	s__MNVX01 sp001872185	Candidatus Pacearchaeota archaeon CG10_big_fil_rev_8_21_14_0_10_31_9	NA
GCA_002763115.1	d__Archaea	p__Nanoarchaeota	c__Nanoarchaeia	o__Pacearchaeales	f__CG1-02-31-27	g__CG1-02-31-27	s__CG1-02-31-27 sp002763115	Candidatus Pacearchaeota archaeon CG10_big_fil_rev_8_21_14_0_10_31_59	NA
GCA_002763155.1	d__Archaea	p__Nanoarchaeota	c__Nanoarchaeia	o__Pacearchaeales	f__GW2011-AR1	g__PFCU01	s__PFCU01 sp002763155	Candidatus Pacearchaeota archaeon CG10_big_fil_rev_8_21_14_0_10_30_48	NA
GCA_002763205.1	d__Archaea	p__Micrarchaeota	c__Micrarchaeia	o__Norongarragalinales	f__Norongarragalinaceae	g__UBA93	s__UBA93 sp002792915	Candidatus Micrarchaeota archaeon CG10_big_fil_rev_8_21_14_0_10_60_32	NA
GCA_002763225.1	d__Archaea	p__Iainarchaeota	c__Iainarchaeia	o__Iainarchaeales	f__1-14-0-10-31-34	g__1-14-0-10-31-34	s__1-14-0-10-31-34 sp002763225	Candidatus Diapherotrites archaeon CG10_big_fil_rev_8_21_14_0_10_31_34	NA
GCA_002763255.1	d__Archaea	p__Micrarchaeota	c__Micrarchaeia	o__Norongarragalinales	f__Norongarragalinaceae	g__UBA93	s__UBA93 sp002792915	Candidatus Micrarchaeota archaeon CG09_land_8_20_14_0_10_60_16	NA
GCA_002763265.1	d__Archaea	p__Nanoarchaeota	c__Nanoarchaeia	o__PEZQ01	f__PEZQ01	g__PEZQ01	s__PEZQ01 sp002763265	archaeon CG10_big_fil_rev_8_21_14_0_10_43_11	NA
GCA_002763275.1	d__Archaea	p__Micrarchaeota	c__Micrarchaeia	o__Norongarragalinales	f__Norongarragalinaceae	g__UBA95	s__UBA95 sp002499405	Candidatus Micrarchaeota archaeon CG09_land_8_20_14_0_10_55_25	NA
GCA_002763335.1	d__Archaea	p__Nanoarchaeota	c__Nanoarchaeia	o__Woesearchaeales	f__CG1-02-47-18	g__CG1-02-47-18	s__CG1-02-47-18 sp002763335	Candidatus Woesearchaeota archaeon CG08_land_8_20_14_0_20_47_9	NA
GCA_002763345.1	d__Archaea	p__Micrarchaeota	c__Micrarchaeia	o__Norongarragalinales	f__Norongarragalinaceae	g__Norongarragalina	s__Norongarragalina sp002763345	Candidatus Micrarchaeota archaeon CG08_land_8_20_14_0_20_59_11	NA
GCA_002778455.1	d__Archaea	p__Micrarchaeota	c__Micrarchaeia	o__Anstonellales	f__Anstonellaceae	g__1-14-0-10-45-29	s__1-14-0-10-45-29 sp002778455	Candidatus Micrarchaeota archaeon CG10_big_fil_rev_8_21_14_0_10_45_29	NA
GCA_002778915.1	d__Archaea	p__Micrarchaeota	c__Micrarchaeia	o__Anstonellales	f__UBA8471	g__UBA8471	s__UBA8471 sp001871535	Candidatus Micrarchaeota archaeon CG08_land_8_20_14_0_20_49_17	NA
GCA_002779065.1	d__Archaea	p__Iainarchaeota	c__Iainarchaeia	o__Iainarchaeales	f__0-14-0-20-34-12	g__0-14-0-20-34-12	s__0-14-0-20-34-12 sp002779065	Candidatus Diapherotrites archaeon CG08_land_8_20_14_0_20_34_12	NA
GCA_002779075.1	d__Archaea	p__Iainarchaeota	c__Iainarchaeia	o__0-14-0-20-30-16	f__0-14-0-20-30-16	g__0-14-0-20-30-16	s__0-14-0-20-30-16 sp002779075	Candidatus Diapherotrites archaeon CG08_land_8_20_14_0_20_30_16	NA
GCA_002779235.1	d__Archaea	p__Nanoarchaeota	c__Nanoarchaeia	o__Woesearchaeales	f__0-14-0-80-44-23	g__0-14-0-80-44-23	s__0-14-0-80-44-23 sp002779235	Candidatus Woesearchaeota archaeon CG07_land_8_20_14_0_80_44_23	NA
GCA_002779555.1	d__Archaea	p__Thermoproteota	c__Bathyarchaeia	o__B26-1	f__UBA233	g__20-14-0-80-47-9	s__20-14-0-80-47-9 sp002779555	Candidatus Bathyarchaeota archaeon CG07_land_8_20_14_0_80_47_9	NA
GCA_002779595.1	d__Archaea	p__Nanoarchaeota	c__Nanoarchaeia	o__Tiddalikarchaeales	f__Tiddalikarchaeaceae	g__CG07-land	s__CG07-land sp002779595	archaeon CG07_land_8_20_14_0_80_38_8	NA
GCA_002779795.1	d__Archaea	p__Nanoarchaeota	c__Nanoarchaeia	o__Tiddalikarchaeales	f__Tiddalikarchaeaceae	g__CG07-land	s__CG07-land sp002779595	archaeon CG06_land_8_20_14_3_00_37_11	NA
GCA_002780105.1	d__Archaea	p__Nanoarchaeota	c__Nanoarchaeia	o__Woesearchaeales	f__CG1-02-33-12	g__CG1-02-33-12	s__CG1-02-33-12 sp002762865	Candidatus Woesearchaeota archaeon CG06_land_8_20_14_3_00_33_13	NA
GCA_002780285.1	d__Archaea	p__Nanoarchaeota	c__Nanoarchaeia	o__Pacearchaeales	f__PEVX01	g__PEVX01	s__PEVX01 sp002780285	Candidatus Pacearchaeota archaeon CG06_land_8_20_14_3_00_35_12	NA
GCA_002780595.1	d__Archaea	p__Huberarchaeota	c__Huberarchaeia	o__Huberarchaeales	f__Huberarchaeaceae	g__Huberarchaeum	s__Huberarchaeum crystalense	Candidatus Huberarchaeum crystalense	NA
GCA_002780965.1	d__Archaea	p__Huberarchaeota	c__Huberarchaeia	o__Huberarchaeales	f__Huberarchaeaceae	g__Huberarchaeum	s__Huberarchaeum crystalense	Candidatus Huberarchaeum crystalense	NA
GCA_002781145.1	d__Archaea	p__Aenigmatarchaeota	c__Aenigmatarchaeia	o__CG10238-14	f__CG10238-14	g__CG10238-14	s__CG10238-14 sp002789635	Candidatus Aenigmarchaeota archaeon CG01_land_8_20_14_3_00_37_9	NA
GCA_002781805.1	d__Archaea	p__Thermoproteota	c__Nitrososphaeria	o__Nitrososphaerales	f__Nitrosopumilaceae	g__Nitrosarchaeum_A	s__Nitrosarchaeum_A sp002781805	Nitrosopumilales archaeon CG15_BIG_FIL_POST_REV_8_21_14_020_37_12	NA
GCA_002781865.1	d__Archaea	p__Aenigmatarchaeota	c__Aenigmatarchaeia	o__CG10238-14	f__CG10238-14	g__CG10238-14	s__CG10238-14 sp002789635	Candidatus Aenigmarchaeota archaeon CG15_BIG_FIL_POST_REV_8_21_14_020_37_27	NA
GCA_002782805.1	d__Archaea	p__Aenigmatarchaeota	c__Aenigmatarchaeia	o__CG10238-14	f__CG10238-14	g__CG10238-14	s__CG10238-14 sp002789635	Candidatus Aenigmarchaeota archaeon CG_4_8_14_3_um_filter_37_24	NA
GCA_002783225.1	d__Archaea	p__Huberarchaeota	c__Huberarchaeia	o__Huberarchaeales	f__Huberarchaeaceae	g__Huberarchaeum	s__Huberarchaeum crystalense	Candidatus Huberarchaeum crystalense	NA
GCA_002783785.1	d__Archaea	p__Huberarchaeota	c__Huberarchaeia	o__Huberarchaeales	f__Huberarchaeaceae	g__Huberarchaeum	s__Huberarchaeum crystalense	Candidatus Huberarchaeum crystalense	NA
GCA_002783845.1	d__Archaea	p__Altiarchaeota	c__Altiarchaeia	o__Altiarchaeales	f__Altiarchaeaceae	g__Altiarchaeum	s__Altiarchaeum hamiconexum	Candidatus Altarchaeum sp. CG_4_8_14_3_um_filter_33_2054	NA
GCA_002784265.1	d__Archaea	p__Aenigmatarchaeota	c__Aenigmatarchaeia	o__CG10238-14	f__CG10238-14	g__CG10238-14	s__CG10238-14 sp002789635	Candidatus Aenigmarchaeota archaeon CG_4_10_14_3_um_filter_37_21	NA
GCA_002784645.1	d__Archaea	p__Nanoarchaeota	c__Nanoarchaeia	o__Pacearchaeales	f__GW2011-AR1	g__CG1-02-35-32	s__CG1-02-35-32 sp002792635	Candidatus Pacearchaeota archaeon CG_4_10_14_0_8_um_filter_35_169	NA
GCA_002785105.1	d__Archaea	p__Huberarchaeota	c__Huberarchaeia	o__Huberarchaeales	f__Huberarchaeaceae	g__Huberarchaeum	s__Huberarchaeum crystalense	Candidatus Huberarchaeum crystalense	NA
GCA_002785255.1	d__Archaea	p__Micrarchaeota	c__Micrarchaeia	o__Norongarragalinales	f__Norongarragalinaceae	g__UBA93	s__UBA93 sp002792915	Candidatus Micrarchaeota archaeon CG_4_10_14_0_8_um_filter_60_7	NA
GCA_002785505.1	d__Archaea	p__Altiarchaeota	c__Altiarchaeia	o__Altiarchaeales	f__Altiarchaeaceae	g__Altiarchaeum	s__Altiarchaeum hamiconexum	Candidatus Altarchaeum sp. CG03_land_8_20_14_0_80_32_618	NA
GCA_002785565.1	d__Archaea	p__Micrarchaeota	c__Micrarchaeia	o__Norongarragalinales	f__Norongarragalinaceae	g__UBA95	s__UBA95 sp002499405	Candidatus Micrarchaeota archaeon CG10_big_fil_rev_8_21_14_0_10_54_18	NA
GCA_002787055.1	d__Archaea	p__Thermoproteota	c__Nitrososphaeria	o__Nitrososphaerales	f__Nitrosopumilaceae	g__Nitrosotenuis	s__Nitrosotenuis aquarius	Candidatus Nitrosotenuis aquarius	strain=AQ6F
GCA_002788515.1	d__Archaea	p__Thermoproteota	c__Nitrososphaeria	o__Nitrososphaerales	f__Nitrosopumilaceae	g__Nitrosopumilus	s__Nitrosopumilus sp002788515	Nitrosopumilales archaeon CG_4_9_14_0_2_um_filter_34_16	NA
GCA_002788615.1	d__Archaea	p__Nanoarchaeota	c__Nanoarchaeia	o__Pacearchaeales	f__GW2011-AR1	g__CG1-02-39-14	s__CG1-02-39-14 sp001872315	Candidatus Pacearchaeota archaeon CG_4_9_14_0_2_um_filter_39_13	NA
GCA_002789105.1	d__Archaea	p__Altiarchaeota	c__Altiarchaeia	o__Altiarchaeales	f__Altiarchaeaceae	g__Altiarchaeum	s__Altiarchaeum hamiconexum	Candidatus Altarchaeum sp. CG_4_9_14_0_8_um_filter_32_206	NA
GCA_002789275.1	d__Archaea	p__Huberarchaeota	c__Huberarchaeia	o__Huberarchaeales	f__Huberarchaeaceae	g__Huberarchaeum	s__Huberarchaeum crystalense	Candidatus Huberarchaeum crystalense	NA
GCA_002789435.1	d__Archaea	p__Nanoarchaeota	c__Nanoarchaeia	o__Pacearchaeales	f__GW2011-AR1	g__CG1-02-35-32	s__CG1-02-35-32 sp002792635	Candidatus Pacearchaeota archaeon CG_4_9_14_0_8_um_filter_35_24	NA
GCA_002789635.1	d__Archaea	p__Aenigmatarchaeota	c__Aenigmatarchaeia	o__CG10238-14	f__CG10238-14	g__CG10238-14	s__CG10238-14 sp002789635	Candidatus Aenigmarchaeota archaeon CG_4_9_14_3_um_filter_37_18	NA
GCA_002790315.1	d__Archaea	p__Huberarchaeota	c__Huberarchaeia	o__Huberarchaeales	f__Huberarchaeaceae	g__Huberarchaeum	s__Huberarchaeum crystalense	Candidatus Huberarchaeum crystalense	NA
GCA_002790875.1	d__Archaea	p__Nanoarchaeota	c__Nanoarchaeia	o__Pacearchaeales	f__GW2011-AR1	g__GW2011-AR1	s__GW2011-AR1 sp002762735	Candidatus Pacearchaeota archaeon CG_4_9_14_3_um_filter_30_11	NA
GCA_002790895.1	d__Archaea	p__Nanoarchaeota	c__Nanoarchaeia	o__Pacearchaeales	f__CG1-02-31-27	g__CG1-02-31-27	s__CG1-02-31-27 sp002763115	Candidatus Pacearchaeota archaeon CG_4_9_14_3_um_filter_31_7	NA
GCA_002790905.1	d__Archaea	p__Nanoarchaeota	c__Nanoarchaeia	o__Pacearchaeales	f__GW2011-AR1	g__CG1-02-35-32	s__CG1-02-35-32 sp002792635	Candidatus Pacearchaeota archaeon CG_4_9_14_3_um_filter_35_19	NA
GCA_002791855.1	d__Archaea	p__Aenigmatarchaeota	c__Aenigmatarchaeia	o__CG10238-14	f__CG10238-14	g__CG10238-14	s__CG10238-14 sp002789635	Candidatus Aenigmarchaeota archaeon CG_4_10_14_0_8_um_filter_37_24	NA
GCA_002792055.1	d__Archaea	p__Nanoarchaeota	c__Nanoarchaeia	o__Woesearchaeales	f__CG1-02-33-12	g__CG1-02-33-12	s__CG1-02-33-12 sp002762865	Candidatus Woesearchaeota archaeon CG_4_10_14_0_2_um_filter_33_10	NA
GCA_002792115.1	d__Archaea	p__Nanoarchaeota	c__Nanoarchaeia	o__Woesearchaeales	f__GW2011-AR9	g__GCA-002792115	s__GCA-002792115 sp002792115	Candidatus Woesearchaeota archaeon CG_4_10_14_0_2_um_filter_33_13	NA
GCA_002792635.1	d__Archaea	p__Nanoarchaeota	c__Nanoarchaeia	o__Pacearchaeales	f__GW2011-AR1	g__CG1-02-35-32	s__CG1-02-35-32 sp002792635	Candidatus Pacearchaeota archaeon CG_4_10_14_0_2_um_filter_35_33	NA
GCA_002792655.1	d__Archaea	p__Nanoarchaeota	c__Nanoarchaeia	o__Pacearchaeales	f__CG1-02-31-27	g__CG1-02-31-27	s__CG1-02-31-27 sp002763115	Candidatus Pacearchaeota archaeon CG_4_10_14_0_2_um_filter_31_10	NA
GCA_002792675.1	d__Archaea	p__Nanoarchaeota	c__Nanoarchaeia	o__Pacearchaeales	f__GW2011-AR1	g__GW2011-AR1	s__GW2011-AR1 sp002762735	Candidatus Pacearchaeota archaeon CG_4_10_14_0_2_um_filter_30_11	NA
GCA_002792685.1	d__Archaea	p__Nanoarchaeota	c__Nanoarchaeia	o__Pacearchaeales	f__GW2011-AR1	g__MNVX01	s__MNVX01 sp001872185	Candidatus Pacearchaeota archaeon CG_4_10_14_0_2_um_filter_05_32_18	NA
GCA_002792915.1	d__Archaea	p__Micrarchaeota	c__Micrarchaeia	o__Norongarragalinales	f__Norongarragalinaceae	g__UBA93	s__UBA93 sp002792915	Candidatus Micrarchaeota archaeon CG_4_10_14_0_2_um_filter_60_11	NA
GCA_002792935.1	d__Archaea	p__Micrarchaeota	c__Micrarchaeia	o__Norongarragalinales	f__Norongarragalinaceae	g__UBA95	s__UBA95 sp002499405	Candidatus Micrarchaeota archaeon CG_4_10_14_0_2_um_filter_55_9	NA
GCA_002794135.1	d__Archaea	p__Nanoarchaeota	c__Nanoarchaeia	o__Woesearchaeales	f__CG08-08-20-14	g__CG08-08-20-14	s__CG08-08-20-14 sp002762705	Candidatus Woesearchaeota archaeon CG08_land_8_20_14_0_20_43_7	NA
GCA_002794155.1	d__Archaea	p__Nanoarchaeota	c__Nanoarchaeia	o__Pacearchaeales	f__GW2011-AR1	g__CG1-02-35-32	s__CG1-02-35-32 sp002792635	Candidatus Pacearchaeota archaeon CG10_big_fil_rev_8_21_14_0_10_35_219	NA
GCA_002813085.1	d__Archaea	p__Methanobacteriota	c__Methanobacteria	o__Methanobacteriales	f__Methanobacteriaceae	g__Methanobrevibacter_A	s__Methanobrevibacter_A smithii	Methanobrevibacter smithii	strain=KB11
GCA_002813655.1	d__Archaea	p__Methanobacteriota	c__Methanobacteria	o__Methanobacteriales	f__Methanobacteriaceae	g__Methanobacterium	s__Methanobacterium subterraneum	Methanobacterium subterraneum	strain=MO-MB1
GCA_002813675.1	d__Archaea	p__Methanobacteriota	c__Methanobacteria	o__Methanobacteriales	f__Methanobacteriaceae	g__Methanobacterium	s__Methanobacterium subterraneum	Methanobacterium sp. MZ-A1	strain=MZ-A1
GCA_002813695.1	d__Archaea	p__Methanobacteriota	c__Methanobacteria	o__Methanobacteriales	f__Methanobacteriaceae	g__Methanobacterium	s__Methanobacterium subterraneum	Methanobacterium subterraneum	strain=A8p
GCA_002825465.1	d__Archaea	p__Asgardarchaeota	c__Thorarchaeia	o__Thorarchaeales	f__Thorarchaeaceae	g__MP8T-1	s__MP8T-1 sp002825465	Candidatus Thorarchaeota archaeon MP8T_1	NA
GCA_002825515.1	d__Archaea	p__Asgardarchaeota	c__Thorarchaeia	o__Thorarchaeales	f__Thorarchaeaceae	g__SMTZ1-45	s__SMTZ1-45 sp002825515	Candidatus Thorarchaeota archaeon MP11T_1	NA
GCA_002825535.1	d__Archaea	p__Asgardarchaeota	c__Thorarchaeia	o__Thorarchaeales	f__Thorarchaeaceae	g__MP8T-1	s__MP8T-1 sp002825465	Candidatus Thorarchaeota archaeon MP9T_1	NA
GCA_002835825.1	d__Archaea	p__Halobacteriota	c__Methanomicrobia	o__Methanomicrobiales	f__Methanoregulaceae	g__Methanoregula	s__Methanoregula sp002835825	Methanoregula sp.	NA
GCA_002838935.1	d__Archaea	p__Thermoplasmatota	c__E2	o__GCA-002838935	f__GCA-002838935	g__GCA-002838935	s__GCA-002838935 sp002838935	Thermoplasmata archaeon HGW-Thermoplasmata-1	NA
GCA_002839545.1	d__Archaea	p__Halobacteriota	c__Methanosarcinia	o__Methanosarcinales	f__Methanoperedenaceae	g__Methanoperedens_A	s__Methanoperedens_A sp002839545	Candidatus Methanoperedenaceae archaeon HGW-Methanoperedenaceae-1	NA
GCA_002839575.1	d__Archaea	p__Halobacteriota	c__Methanomicrobia	o__Methanomicrobiales	f__Methanoculleaceae	g__Methanoculleus	s__Methanoculleus sp002839575	Methanomicrobiales archaeon HGW-Methanomicrobiales-6	NA
GCA_002839605.1	d__Archaea	p__Halobacteriota	c__Methanomicrobia	o__Methanomicrobiales	f__Methanoregulaceae	g__Methanoregula	s__Methanoregula sp002839605	Methanomicrobiales archaeon HGW-Methanomicrobiales-3	NA
GCA_002839645.1	d__Archaea	p__Halobacteriota	c__Methanomicrobia	o__Methanomicrobiales	f__Methanoculleaceae	g__Methanoculleus	s__Methanoculleus sp002839645	Methanomicrobiales archaeon HGW-Methanomicrobiales-2	NA
GCA_002839675.1	d__Archaea	p__Halobacteriota	c__Methanomicrobia	o__Methanomicrobiales	f__Methanoregulaceae	g__Methanoregula	s__Methanoregula sp002839675	Methanomicrobiales archaeon HGW-Methanomicrobiales-1	NA
GCA_002839685.1	d__Archaea	p__Methanobacteriota	c__Methanobacteria	o__Methanobacteriales	f__Methanobacteriaceae	g__Methanobacterium	s__Methanobacterium subterraneum	Methanobacteriales archaeon HGW-Methanobacteriales-2	NA
GCA_002839705.1	d__Archaea	p__Methanobacteriota	c__Methanobacteria	o__Methanobacteriales	f__Methanobacteriaceae	g__UBA349	s__UBA349 sp002839705	Methanobacteriales archaeon HGW-Methanobacteriales-1	NA
GCA_002841105.1	d__Archaea	p__Altiarchaeota	c__Altiarchaeia	o__Altiarchaeales	f__Altiarchaeaceae	g__Altiarchaeum	s__Altiarchaeum sp002841105	Candidatus Altiarchaeales archaeon HGW-Altiarchaeales-1	NA
GCA_002844195.1	d__Archaea	p__Halobacteriota	c__Halobacteria	o__Halobacteriales	f__Haloferacaceae	g__Halegenticoccus	s__Halegenticoccus soli	Halegenticoccus soli	strain=SYSU A9-0
GCA_002844335.1	d__Archaea	p__Halobacteriota	c__Halobacteria	o__Halobacteriales	f__Haloarculaceae	g__Haloarcula	s__Haloarcula taiwanensis	Haloarcula taiwanensis	strain=Taiwanensis
GCA_002855455.1	d__Archaea	p__Halobacteriota	c__Halobacteria	o__Halobacteriales	f__Natrialbaceae	g__Natronobacterium	s__Natronobacterium gregoryi	Natronobacterium gregoryi SP2	strain=SP2
GCA_002855745.1	d__Archaea	p__Thermoproteota	c__Thermoprotei	o__Thermofilales	f__Thermofilaceae	g__Infirmifilum	s__Infirmifilum sp002855745	Thermofilum sp. NZ13	NA
GCA_002867475.1	d__Archaea	p__Nanoarchaeota	c__Nanoarchaeia	o__Woesearchaeales	f__BM511	g__BM511	s__BM511 sp002867475	Candidatus Woesearchaeota archaeon	NA
GCA_002871295.1	d__Archaea	p__Thermoproteota	c__Thermoprotei_A	o__Sulfolobales	f__Fervidicoccaceae	g__Fervidicoccus	s__Fervidicoccus fontis	Fervidicoccus fontis	NA
GCA_002877855.1	d__Archaea	p__Thermoproteota	c__Thermoprotei_A	o__Sulfolobales	f__Acidilobaceae	g__Caldisphaera	s__Caldisphaera sp002877855	Caldisphaera sp.	NA
GCA_002878135.1	d__Archaea	p__Thermoplasmatota	c__Thermoplasmata	o__ARK-15	f__ARK-15	g__ARK-15	s__ARK-15 sp002878135	Aciduliprofundum sp.	NA
GCA_002897655.1	d__Archaea	p__Nanoarchaeota	c__Nanoarchaeia	o__Pacearchaeales	f__GW2011-AR1	g__BMS3ABIN17	s__BMS3ABIN17 sp002897655	archaeon BMS3Abin17	NA
GCA_002897955.1	d__Archaea	p__Hydrothermarchaeota	c__Hydrothermarchaeia	o__Hydrothermarchaeales	f__BMS3B	g__BMS3B	s__BMS3B sp002897955	archaeon BMS3Bbin15	NA
GCA_002898035.1	d__Archaea	p__Hydrothermarchaeota	c__Hydrothermarchaeia	o__Hydrothermarchaeales	f__SZUA-236	g__SZUA-236	s__SZUA-236 sp002923215	archaeon BMS3Bbin16	NA
GCA_002898355.1	d__Archaea	p__Thermoproteota	c__Nitrososphaeria_A	o__Caldarchaeales	f__Caldarchaeaceae	g__HRBIN01	s__HRBIN01 sp002898355	archaeon HR01	NA
GCA_002898395.1	d__Archaea	p__Thermoproteota	c__Nitrososphaeria_A	o__Caldarchaeales	f__HR02	g__HRBIN02	s__HRBIN02 sp002898395	archaeon HR02	NA
GCA_002898445.1	d__Archaea	p__Thermoproteota	c__Nitrososphaeria	o__Nitrososphaerales	f__Nitrosocaldaceae	g__Nitrosocaldus	s__Nitrosocaldus cavascurensis	archaeon HR05	NA
GCA_002898655.1	d__Archaea	p__Thermoproteota	c__Nitrososphaeria	o__Nitrososphaerales	f__Nitrosocaldaceae	g__Nitrosocaldus	s__Nitrosocaldus sp002898655	archaeon HR04	NA
GCA_002899805.1	d__Archaea	p__Thermoproteota	c__Thermoprotei_A	o__Sulfolobales	f__Fervidicoccaceae	g__ARK-14	s__ARK-14 sp002899805	Fervidicoccus sp.	NA
GCA_002900535.1	d__Archaea	p__Thermoplasmatota	c__E2	o__DHVEG-1	f__DHVEG-1	g__M9B1D	s__M9B1D sp002900535	Thermoplasmata archaeon M9B1D	NA
GCA_002900545.1	d__Archaea	p__Thermoplasmatota	c__E2	o__DHVEG-1	f__DHVEG-1	g__SM1-50	s__SM1-50 sp002900555	Thermoplasmata archaeon M11B2D	NA
GCA_002900555.1	d__Archaea	p__Thermoplasmatota	c__E2	o__DHVEG-1	f__DHVEG-1	g__SM1-50	s__SM1-50 sp002900555	Thermoplasmata archaeon M9B2D	NA
GCA_002906215.1	d__Archaea	p__Thermoproteota	c__Nitrososphaeria	o__Nitrososphaerales	f__Nitrosocaldaceae	g__Nitrosocaldus	s__Nitrosocaldus cavascurensis	Candidatus Nitrosocaldus islandicus	NA
GCA_002906575.1	d__Archaea	p__Halobacteriota	c__Halobacteria	o__Halobacteriales	f__Haloferacaceae	g__Salinigranum	s__Salinigranum rubrum	Salinigranum rubrum	strain=GX10
GCA_002923215.1	d__Archaea	p__Hydrothermarchaeota	c__Hydrothermarchaeia	o__Hydrothermarchaeales	f__SZUA-236	g__SZUA-236	s__SZUA-236 sp002923215	archaeon BMS3Abin16	NA
GCA_002926195.1	d__Archaea	p__Halobacteriota	c__Methanosarcinia	o__Methanosarcinales	f__Methanocomedenaceae	g__Methanomarinus	s__Methanomarinus sp002926195	ANME-2 cluster archaeon HR1	NA
GCA_002945325.1	d__Archaea	p__Methanobacteriota	c__Methanococci	o__Methanococcales	f__Methanococcaceae	g__Methanococcus	s__Methanococcus maripaludis	Methanococcus maripaludis	strain=DSM 2067
GCA_002952775.1	d__Archaea	p__Halobacteriota	c__Halobacteria	o__Halobacteriales	f__Haloferacaceae	g__Halalkaliarchaeum	s__Halalkaliarchaeum desulfuricum	Halalkaliarchaeum desulfuricum	strain=AArc-Sl
GCA_002973515.1	d__Archaea	p__Halobacteriota	c__Methanosarcinia	o__Methanosarcinales	f__Methanosarcinaceae	g__Methanohalophilus	s__Methanohalophilus euhalobius	Methanohalophilus euhalobius	strain=DSM 10369
GCA_003009755.1	d__Archaea	p__Thermoplasmatota	c__SW-10-69-26	o__SW-10-69-26	f__SW-10-69-26	g__SW-10-69-26	s__SW-10-69-26 sp003009755	Thermoplasmatales archaeon SW_10_69_26	NA
GCA_003009795.1	d__Archaea	p__Nanohaloarchaeota	c__Nanosalinia	o__Nanosalinales	f__Nanosalinaceae	g__SW-4-43-9	s__SW-4-43-9 sp003009795	Nanohaloarchaea archaeon SW_7_43_1	NA
GCA_003009815.1	d__Archaea	p__Nanohaloarchaeota	c__Nanosalinia	o__Nanosalinales	f__Nanosalinaceae	g__SW-4-43-9	s__SW-4-43-9 sp003009815	Nanohaloarchaea archaeon SW_4_43_9	NA
GCA_003019345.1	d__Archaea	p__Thermoproteota	c__Thermoprotei_A	o__Marsarchaeales	f__Marsarchaeaceae	g__ECH-B-1	s__ECH-B-1 sp003019535	Candidatus Marsarchaeota G2 archaeon ECH_B_SAG-M15	NA
GCA_003019385.1	d__Archaea	p__Thermoproteota	c__Thermoprotei_A	o__Marsarchaeales	f__Marsarchaeaceae	g__BE-D	s__BE-D sp003019595	Candidatus Marsarchaeota G2 archaeon ECH_B_SAG-G16	NA
GCA_003019415.1	d__Archaea	p__Thermoproteota	c__Thermoprotei_A	o__Marsarchaeales	f__Marsarchaeaceae	g__BE-D	s__BE-D sp003019595	Candidatus Marsarchaeota G2 archaeon ECH_B_SAG-F08	NA
GCA_003019475.1	d__Archaea	p__Thermoproteota	c__Thermoprotei_A	o__Marsarchaeales	f__Marsarchaeaceae	g__ECH-B-1	s__ECH-B-1 sp003019535	Candidatus Marsarchaeota G2 archaeon ECH_B_3	NA
GCA_003019485.1	d__Archaea	p__Thermoproteota	c__Thermoprotei_A	o__Marsarchaeales	f__Marsarchaeaceae	g__ECH-B-1	s__ECH-B-1 sp003019535	Candidatus Marsarchaeota G2 archaeon ECH_B_SAG-C16	NA
GCA_003019515.1	d__Archaea	p__Thermoproteota	c__Thermoprotei_A	o__Marsarchaeales	f__Marsarchaeaceae	g__ECH-B-1	s__ECH-B-1 sp003019535	Candidatus Marsarchaeota G2 archaeon ECH_B_2	NA
GCA_003019535.1	d__Archaea	p__Thermoproteota	c__Thermoprotei_A	o__Marsarchaeales	f__Marsarchaeaceae	g__ECH-B-1	s__ECH-B-1 sp003019535	Candidatus Marsarchaeota G2 archaeon ECH_B_1	NA
GCA_003019545.1	d__Archaea	p__Thermoproteota	c__Thermoprotei_A	o__Marsarchaeales	f__Marsarchaeaceae	g__ECH-B-1	s__ECH-B-1 sp003019535	Candidatus Marsarchaeota G2 archaeon OSP_D	NA
GCA_003019595.1	d__Archaea	p__Thermoproteota	c__Thermoprotei_A	o__Marsarchaeales	f__Marsarchaeaceae	g__BE-D	s__BE-D sp003019595	Candidatus Marsarchaeota G1 archaeon BE_D	NA
GCA_003019615.1	d__Archaea	p__Thermoproteota	c__Thermoprotei_A	o__Marsarchaeales	f__Marsarchaeaceae	g__BE-D	s__BE-D sp003019595	Candidatus Marsarchaeota G1 archaeon OSP_C	NA
GCA_003020925.1	d__Archaea	p__Halobacteriota	c__Halobacteria	o__Halobacteriales	f__Haloarculaceae	g__Halomicroarcula	s__Halomicroarcula sp003020925	Halobacteriales archaeon QS_6_64_34	NA
GCA_003020945.1	d__Archaea	p__Halobacteriota	c__Halobacteria	o__Halobacteriales	f__Haloferacaceae	g__Halobaculum	s__Halobaculum sp003020945	Halobacteriales archaeon QS_6_71_20	NA
GCA_003020965.1	d__Archaea	p__Halobacteriota	c__Halobacteria	o__Halobacteriales	f__Haloarculaceae	g__Natronomonas	s__Natronomonas sp003020965	Halobacteriales archaeon QS_4_69_225	NA
GCA_003020985.1	d__Archaea	p__Halobacteriota	c__Halobacteria	o__Halobacteriales	f__Haloarculaceae	g__Haloglomus	s__Haloglomus sp003020985	Halobacteriales archaeon QS_4_70_19	NA
GCA_003021005.1	d__Archaea	p__Halobacteriota	c__Halobacteria	o__Halobacteriales	f__Haloarculaceae	g__Natronomonas	s__Natronomonas sp003021005	Halobacteriales archaeon QS_1_69_70	NA
GCA_003021015.1	d__Archaea	p__Halobacteriota	c__Halobacteria	o__Halobacteriales	f__Haloarculaceae	g__Halovenus	s__Halovenus sp003021015	Halobacteriales archaeon QS_4_66_20	NA
GCA_003021045.1	d__Archaea	p__Halobacteriota	c__Halobacteria	o__Halobacteriales	f__Halococcaceae	g__Halococcus	s__Halococcus sp003021045	Halobacteriales archaeon QS_4_69_34	NA
GCA_003021085.1	d__Archaea	p__Halobacteriota	c__Halobacteria	o__Halobacteriales	f__PXRE01	g__PXRE01	s__PXRE01 sp003021085	Halobacteriales archaeon QS_1_68_20	NA
GCA_003021105.1	d__Archaea	p__Halobacteriota	c__Halobacteria	o__Halobacteriales	f__Haloarculaceae	g__QS-1-68-17	s__QS-1-68-17 sp003021105	Halobacteriales archaeon QS_1_68_17	NA
GCA_003021145.1	d__Archaea	p__Halobacteriota	c__Halobacteria	o__Halobacteriales	f__Halococcaceae	g__Halococcus	s__Halococcus sp003022685	Halobacteriales archaeon QH_9_66_26	NA
GCA_003021175.1	d__Archaea	p__Halobacteriota	c__Halobacteria	o__Halobacteriales	f__Haloarculaceae	g__Halosegnis	s__Halosegnis sp003021175	Halobacteriales archaeon QH_7_66_36	NA
GCA_003021205.1	d__Archaea	p__Halobacteriota	c__Halobacteria	o__Halobacteriales	f__Haloarculaceae	g__Halovenus	s__Halovenus sp003022845	Halobacteriales archaeon QH_6_66_25	NA
GCA_003021235.1	d__Archaea	p__Halobacteriota	c__Halobacteria	o__Halobacteriales	f__Halococcaceae	g__Halococcus	s__Halococcus sp003021235	Halobacteriales archaeon QH_6_64_20	NA
GCA_003021285.1	d__Archaea	p__Halobacteriota	c__Halobacteria	o__Halobacteriales	f__Haloarculaceae	g__Halovenus	s__Halovenus sp003021285	Halobacteriales archaeon QH_2_65_14	NA
GCA_003021305.1	d__Archaea	p__Halobacteriota	c__Halobacteria	o__Halobacteriales	f__Haloarculaceae	g__QH-10-67-22	s__QH-10-67-22 sp003021305	Halobacteriales archaeon QH_10_67_22	NA
GCA_003021325.1	d__Archaea	p__Halobacteriota	c__Halobacteria	o__Halobacteriales	f__Haloarculaceae	g__Natronomonas	s__Natronomonas sp003021325	Halobacteriales archaeon QH_10_70_21	NA
GCA_003021335.1	d__Archaea	p__Halobacteriota	c__Halobacteria	o__Halobacteriales	f__Haloarculaceae	g__Halovenus	s__Halovenus sp003021335	Halobacteriales archaeon QH_10_67_13	NA
GCA_003021655.1	d__Archaea	p__Halobacteriota	c__Halobacteria	o__Halobacteriales	f__Haloarculaceae	g__QS-4-69-31	s__QS-4-69-31 sp003021655	Halobacteriales archaeon QS_4_69_31	NA
GCA_003021685.1	d__Archaea	p__Halobacteriota	c__Halobacteria	o__Halobacteriales	f__Haloarculaceae	g__Halomicrobium	s__Halomicrobium sp003021685	Halobacteriales archaeon QS_4_62_28	NA
GCA_003021705.1	d__Archaea	p__Halobacteriota	c__Halobacteria	o__Halobacteriales	f__Halococcaceae	g__Halococcus	s__Halococcus sp003021705	Halobacteriales archaeon QS_3_64_16	NA
GCA_003021725.1	d__Archaea	p__Halobacteriota	c__Halobacteria	o__Halobacteriales	f__Halococcaceae	g__Halococcus	s__Halococcus sp003021725	Halobacteriales archaeon QH_8_64_26	NA
GCA_003021745.1	d__Archaea	p__Halobacteriota	c__Halobacteria	o__Halobacteriales	f__Haloarculaceae	g__Natronomonas	s__Natronomonas sp003021745	Halobacteriales archaeon QH_7_69_31	NA
GCA_003021755.1	d__Archaea	p__Halobacteriota	c__Halobacteria	o__Halobacteriales	f__Haloarculaceae	g__Halomicroarcula	s__Halomicroarcula sp003021755	Halobacteriales archaeon QH_8_67_36	NA
GCA_003021785.1	d__Archaea	p__Halobacteriota	c__Halobacteria	o__Halobacteriales	f__Haloarculaceae	g__Halosegnis	s__Halosegnis sp003021785	Halobacteriales archaeon QH_7_65_31	NA
GCA_003021975.1	d__Archaea	p__Halobacteriota	c__Halobacteria	o__Halobacteriales	f__Haloarculaceae	g__Halomarina	s__Halomarina sp003021975	Halobacteriales archaeon QS_5_70_17	NA
GCA_003022005.1	d__Archaea	p__Halobacteriota	c__Halobacteria	o__Halobacteriales	f__Haloarculaceae	g__QS-5-70-15	s__QS-5-70-15 sp003022005	Halobacteriales archaeon QS_5_70_15	NA
GCA_003022045.1	d__Archaea	p__Halobacteriota	c__Halobacteria	o__Halobacteriales	f__Haloarculaceae	g__Halosimplex	s__Halosimplex sp003023165	Halobacteriales archaeon QH_8_67_27	NA
GCA_003022085.1	d__Archaea	p__Halobacteriota	c__Halobacteria	o__Halobacteriales	f__Haloarculaceae	g__Halovenus	s__Halovenus sp003022085	Halobacteriales archaeon QH_10_65_19	NA
GCA_003022685.1	d__Archaea	p__Halobacteriota	c__Halobacteria	o__Halobacteriales	f__Halococcaceae	g__Halococcus	s__Halococcus sp003022685	Halobacteriales archaeon SW_9_67_24	NA
GCA_003022725.1	d__Archaea	p__Halobacteriota	c__Halobacteria	o__Halobacteriales	f__Haloarculaceae	g__Halovenus	s__Halovenus sp003022725	Halobacteriales archaeon SW_7_65_23	NA
GCA_003022745.1	d__Archaea	p__Halobacteriota	c__Halobacteria	o__Halobacteriales	f__Haloarculaceae	g__SW-9-67-25	s__SW-9-67-25 sp003022745	Halobacteriales archaeon SW_9_67_25	NA
GCA_003022765.1	d__Archaea	p__Halobacteriota	c__Halobacteria	o__Halobacteriales	f__Haloarculaceae	g__Halosegnis	s__Halosegnis sp003021785	Halobacteriales archaeon SW_8_65_20	NA
GCA_003022805.1	d__Archaea	p__Halobacteriota	c__Halobacteria	o__Halobacteriales	f__SW-7-71-33	g__SW-7-71-33	s__SW-7-71-33 sp003022865	Halobacteriales archaeon SW_7_71_33	NA
GCA_003022815.1	d__Archaea	p__Halobacteriota	c__Halobacteria	o__Halobacteriales	f__Haloarculaceae	g__Natronomonas	s__Natronomonas sp003022815	Halobacteriales archaeon SW_5_68_122	NA
GCA_003022845.1	d__Archaea	p__Halobacteriota	c__Halobacteria	o__Halobacteriales	f__Haloarculaceae	g__Halovenus	s__Halovenus sp003022845	Halobacteriales archaeon SW_10_66_29	NA
GCA_003022865.1	d__Archaea	p__Halobacteriota	c__Halobacteria	o__Halobacteriales	f__SW-7-71-33	g__SW-7-71-33	s__SW-7-71-33 sp003022865	Halobacteriales archaeon SW_5_70_135	NA
GCA_003022905.1	d__Archaea	p__Halobacteriota	c__Halobacteria	o__Halobacteriales	f__Haloarculaceae	g__Natronomonas	s__Natronomonas sp003022905	Halobacteriales archaeon QS_9_68_42	NA
GCA_003022925.1	d__Archaea	p__Halobacteriota	c__Halobacteria	o__Halobacteriales	f__Halococcaceae	g__Halococcus	s__Halococcus sp003022925	Halobacteriales archaeon QS_8_65_32	NA
GCA_003022945.1	d__Archaea	p__Halobacteriota	c__Halobacteria	o__Halobacteriales	f__Haloarculaceae	g__Natronomonas	s__Natronomonas sp003022945	Halobacteriales archaeon QS_8_69_73	NA
GCA_003023165.1	d__Archaea	p__Halobacteriota	c__Halobacteria	o__Halobacteriales	f__Haloarculaceae	g__Halosimplex	s__Halosimplex sp003023165	Halobacteriales archaeon QS_9_67_15	NA
GCA_003023185.1	d__Archaea	p__Halobacteriota	c__Halobacteria	o__Halobacteriales	f__Haloarculaceae	g__Halosegnis	s__Halosegnis sp003023185	Halobacteriales archaeon QS_9_67_17	NA
GCA_003023195.1	d__Archaea	p__Halobacteriota	c__Halobacteria	o__Halobacteriales	f__SW-7-71-33	g__SW-7-71-33	s__SW-7-71-33 sp003023195	Halobacteriales archaeon QS_8_69_26	NA
GCA_003023215.1	d__Archaea	p__Halobacteriota	c__Halobacteria	o__Halobacteriales	f__Haloarculaceae	g__Halosegnis	s__Halosegnis sp003021785	Halobacteriales archaeon SW_6_65_46	NA
GCA_003023405.1	d__Archaea	p__Halobacteriota	c__Halobacteria	o__Halobacteriales	f__Haloferacaceae	g__Halorubrum	s__Halorubrum sp003023405	Halobacteriales archaeon SW_8_68_21	NA
[truncated: 45,749 more rows]

## Sheet: ST3
Supplementary Table 3. Defense systems predicted by DefenseFinder
sys_id	type	subtype	sys_beg	sys_end	protein_in_syst	genes_count	name_of_profiles_in_sys
GCA_000006805.1_AbiE_1	AbiE	AbiE	AAC82850.1	AAC82851.1	AAC82850.1,AAC82851.1	2	AbiEii__AbiEii,AbiEii__AbiEi_1
GCA_000006805.1_AbiE_2	AbiE	AbiE	AAC82926.1	AAC82927.1	AAC82926.1,AAC82927.1	2	AbiEii__AbiEi_1,AbiEii__AbiEii
GCA_000006805.1_AbiE_3	AbiE	AbiE	AAG20774.1	AAG20775.1	AAG20774.1,AAG20775.1	2	AbiEii__AbiEii,AbiEii__AbiEi_1
GCA_000006805.1_SoFic_4	SoFIC	SoFic	AAG20974.1	AAG20974.1	AAG20974.1	1	SoFic__SoFic
GCA_000006805.1_RM_Type_I_5	RM	RM_Type_I	AAG18733.1	AAG18735.1	AAG18733.1,AAG18734.1,AAG18735.1	3	RM__Type_I_MTases,RM__Type_I_S,RM__Type_I_REases
GCA_000006805.1_RM_Type_IIG_6	RM	RM_Type_IIG	AAC82880.1	AAC82880.1	AAC82880.1	1	RM_Type_IIG__Type_IIG
GCA_000006805.1_RM_Type_IIG_7	RM	RM_Type_IIG	AAG20810.1	AAG20810.1	AAG20810.1	1	RM_Type_IIG__Type_IIG
GCA_000007005.1_RM_Type_II_1	RM	RM_Type_II	AAK40603.1	AAK40604.1	AAK40603.1,AAK40604.1	2	RM_Type_II__Type_II_REases,RM_Type_II__Type_II_MTases
GCA_000007005.1_CAS_Class1-Subtype-I-A_2	CasFinder	CAS_Class1-Subtype-I-A	AAK41633.1	AAK41641.1	AAK41633.1,AAK41634.1,AAK41635.1,AAK41636.1,AAK41637.1,AAK41638.1,AAK41639.1,AAK41640.1,AAK41641.1	9	csa5gr11_I-A_5,cas7_I-A_1,cas5_I-A_12,cas8a7_I-A_1,cas3_I_5,cas3HD_I_3,cas2_I_II_III_IV_V_VI_5,cas1_I_II_III_IV_V_VI_8,cas6_I_II_III_IV_V_VI_15
GCA_000007005.1_CAS_Class1-Subtype-I-A_3	CasFinder	CAS_Class1-Subtype-I-A	AAK41670.1	AAK41682.1	AAK41670.1,AAK41671.1,AAK41672.1,AAK41673.1,AAK41674.1,AAK41675.1,AAK41676.1,AAK41677.1,AAK41678.1,AAK41680.1,AAK41681.1,AAK41682.1	12	cas6_I_II_III_IV_V_VI_7,cas8a1_I-A_2,cas3HD_I_3,cas3_I_5,cas5_I-A_1,cas7_I-A_2,csa5gr11_I-A_12,casR_I_2,casR_I_2,cas4_I_II_III_IV_V_VI_4,cas1_I_II_III_IV_V_VI_8,cas4_I-A_1
GCA_000007005.1_CAS_Class1-Subtype-I-A_4	CasFinder	CAS_Class1-Subtype-I-A	AAK42186.1	AAK42192.1	AAK42186.1,AAK42187.1,AAK42188.1,AAK42189.1,AAK42190.1,AAK42191.1,AAK42192.1	7	csa5gr11_I-A_12,cas7_I-A_2,cas5_I-A_1,cas3_I_5,cas3HD_I_3,cas8a1_I-A_2,cas6_I_II_III_IV_V_VI_7
GCA_000007005.1_CAS_Class1-Subtype-III-B_5	CasFinder	CAS_Class1-Subtype-III-B	AAK41732.1	AAK41735.1	AAK41732.1,AAK41733.1,AAK41734.1,AAK41735.1	4	cmr6gr7_III-B_3,cmr1gr7_III-B_III-C_3,cmr5gr11_III-B_6,cmr4gr7_III-B_III-C_1
GCA_000007005.1_CAS_Class1-Subtype-III-B_6	CasFinder	CAS_Class1-Subtype-III-B	AAK41924.1	AAK41929.1	AAK41924.1,AAK41925.1,AAK41926.1,AAK41928.1,AAK41929.1	5	cmr7_III-B_1,cmr4gr7_III-B_III-C_1,cmr5gr11_III-B_15,cas10_III_7,cmr3gr5_III-B_III-C_4
GCA_000007005.1_CAS_Class1-Subtype-III-B_7	CasFinder	CAS_Class1-Subtype-III-B	AAK42176.1	AAK42182.1	AAK42176.1,AAK42177.1,AAK42178.1,AAK42179.1,AAK42180.1,AAK42181.1,AAK42182.1	7	cmr7_III-B_1,cmr4gr7_III-B_III-C_2,cmr5gr11_III-B_15,cmr1gr7_III-B_III-C_3,cmr6gr7_III-B_3,cas10_III_7,cmr3gr5_III-B_III-C_4
GCA_000007005.1_CAS_Class1-Subtype-III-D_8	CasFinder	CAS_Class1-Subtype-III-D	AAK41656.1	AAK41670.1	AAK41656.1,AAK41657.1,AAK41658.1,AAK41659.1,AAK41660.1,AAK41664.1,AAK41665.1,AAK41666.1,AAK41670.1	9	cas6_I-A_III-D_3,casR_I_2,csm2gr11_III-D_8,csm3gr7_III-A_III-D_2,csm3gr7_III-A_III-D_2,csm3gr7_III-A_III-D_10,csx10gr5_III-D_5,csm3gr7_III-A_III-D_10,cas6_I_II_III_IV_V_VI_7
GCA_000007065.1_RM_Type_I_10	RM	RM_Type_I	AAM32672.1	AAM32677.1	AAM32672.1,AAM32674.1,AAM32677.1	3	RM__Type_I_REases,RM__Type_I_S,RM__Type_I_MTases
GCA_000007065.1_DISARM_2_1	DISARM	DISARM_2	AAM29970.1	AAM29974.1	AAM29970.1,AAM29971.1,AAM29972.1,AAM29974.1	4	DISARM__drmC,DISARM__drmB,DISARM__drmA,DISARM_2__drmMII
GCA_000007065.1_Kiwa_2	Kiwa	Kiwa	AAM31896.1	AAM31897.1	AAM31896.1,AAM31897.1	2	Kiwa__KwaA,Kiwa__KwaB
GCA_000007065.1_AVAST_IV_3	AVAST	AVAST_IV	AAM32737.1	AAM32737.1	AAM32737.1	1	AVAST_IV__Avs4A
GCA_000007065.1_RM_Type_I_4	RM	RM_Type_I	AAM30125.1	AAM30127.1	AAM30125.1,AAM30126.1,AAM30127.1	3	RM__Type_I_MTases,RM__Type_I_S,RM__Type_I_REases
GCA_000007065.1_RM_Type_I_5	RM	RM_Type_I	AAM31357.1	AAM31365.1	AAM31357.1,AAM31363.1,AAM31365.1	3	RM__Type_I_REases,RM__Type_I_S,RM__Type_I_MTases
GCA_000007065.1_RM_Type_I_6	RM	RM_Type_I	AAM31894.1	AAM31900.1	AAM31894.1,AAM31895.1,AAM31900.1	3	RM__Type_I_MTases,RM__Type_I_S,RM__Type_I_REases
GCA_000007065.1_RM_Type_I_7	RM	RM_Type_I	AAM31988.1	AAM31990.1	AAM31988.1,AAM31989.1,AAM31990.1	3	RM__Type_I_REases,RM__Type_I_S,RM__Type_I_MTases
GCA_000007065.1_RM_Type_I_8	RM	RM_Type_I	AAM32399.1	AAM32401.1	AAM32399.1,AAM32400.1,AAM32401.1	3	RM__Type_I_S,RM__Type_I_MTases,RM__Type_I_REases
GCA_000007065.1_RM_Type_I_9	RM	RM_Type_I	AAM32429.1	AAM32436.1	AAM32429.1,AAM32435.1,AAM32436.1	3	RM__Type_I_REases,RM__Type_I_S,RM__Type_I_MTases
GCA_000007065.1_RM_Type_I_11	RM	RM_Type_I	AAM32837.1	AAM32843.1	AAM32837.1,AAM32838.1,AAM32843.1	3	RM__Type_I_REases,RM__Type_I_S,RM__Type_I_MTases
GCA_000007065.1_RM_Type_IIG_12	RM	RM_Type_IIG	AAM29852.1	AAM29852.1	AAM29852.1	1	RM_Type_IIG__Type_IIG
GCA_000007065.1_RM_Type_IV_13	RM	RM_Type_IV	AAM30931.1	AAM30931.1	AAM30931.1	1	RM_Type_IV__Type_IV_REases
GCA_000007065.1_CAS_Class1-Subtype-I-B_14	CasFinder	CAS_Class1-Subtype-I-B	AAM30253.1	AAM30261.1	AAM30253.1,AAM30254.1,AAM30255.1,AAM30256.1,AAM30257.1,AAM30258.1,AAM30259.1,AAM30260.1,AAM30261.1	9	cas4_I_II_III_IV_V_VI_1,cas2_I_II_III_IV_V_VI_3,cas1_I_II_III_IV_V_VI_2,cas6_I_II_III_IV_V_VI_12,cas3_I_5,cas5_I-B_17,cas7_I-B_8,cas8b1_I-B_2,casR_I_2
GCA_000007065.1_CAS_Class1-Subtype-III-C_15	CasFinder	CAS_Class1-Subtype-III-C	AAM33049.1	AAM33055.1	AAM33049.1,AAM33050.1,AAM33051.1,AAM33052.1,AAM33053.1,AAM33054.1,AAM33055.1	7	cmr3gr5_III-C_1,cmr5gr11_III-C_11,cmr4gr7_III-B_III-C_1,cas10_III-C_3,cmr6gr7_III-C_1,cmr1gr7_III-B_III-C_3,cas6_I_II_III_IV_V_VI_12
GCA_000007185.1_pAgo_1	pAgo	pAgo	AAM02524.1	AAM02524.1	AAM02524.1	1	pAgo__COG1431_pAgo
GCA_000007185.1_CAS_Class1-Subtype-III-A_2	CasFinder	CAS_Class1-Subtype-III-A	AAM02523.1	AAM02532.1	AAM02523.1,AAM02525.1,AAM02527.1,AAM02528.1,AAM02529.1,AAM02532.1	6	cas2_I_II_III_IV_V_VI_1,cas1_I_II_III_IV_V_VI_8,cas10_III_7,csm2gr11_III-A_3,csm3gr7_III-A_III-D_10,csm5gr7_III-A_2
GCA_000007185.1_CAS_Class1-Type-III_3	CasFinder	CAS_Class1-Type-III	AAM02506.1	AAM02512.1	AAM02506.1,AAM02509.1,AAM02510.1,AAM02511.1,AAM02512.1	5	csm6_III_6,cmr4gr7_III-B_III-C_2,cas10_III_6,cmr3gr5_III-B_III-C_4,cmr4gr7_III-B_III-C_2
GCA_000007225.1_RM_Type_II_1	RM	RM_Type_II	AAL64747.1	AAL64748.1	AAL64747.1,AAL64748.1	2	RM_Type_II__Type_II_REases,RM_Type_II__Type_II_MTases
GCA_000007225.1_RM_Type_IIG_2	RM	RM_Type_IIG	AAL62652.1	AAL62652.1	AAL62652.1	1	RM_Type_IIG__Type_IIG
GCA_000007225.1_CAS_Class1-Subtype-I-A_3	CasFinder	CAS_Class1-Subtype-I-A	AAL62618.1	AAL62631.1	AAL62618.1,AAL62619.1,AAL62620.1,AAL62621.1,AAL62622.1,AAL62623.1,AAL62625.1,AAL62626.1,AAL62627.1,AAL62628.1,AAL62629.1,AAL62630.1,AAL62631.1	13	cas6_I_II_III_IV_V_VI_15,cas4_I_II_III_IV_V_VI_1,cas2_I_II_III_IV_V_VI_5,cas1_I_II_III_IV_V_VI_8,cas4_I-A_1,casR_I_2,cas8a2_I-A_2,cas3HD_I_3,cas3_I_5,cas5_I-A_1,cas7_I-A_1,csa5gr11_I-A_6,cas6_I_II_III_IV_V_VI_15
GCA_000007225.1_CAS_Class1-Subtype-III-A_4	CasFinder	CAS_Class1-Subtype-III-A	AAL62566.1	AAL62581.1	AAL62566.1,AAL62568.1,AAL62569.1,AAL62570.1,AAL62572.1,AAL62574.1,AAL62576.1,AAL62579.1,AAL62581.1	9	cas10_III_7,csm4gr5_III-A_1,csm3gr7_III-A_III-D_10,csm2gr11_III-A_12,csm6_III_5,csm6_III_5,csm6_III_5,csm6_III_6,cas6_I_II_III_IV_V_VI_15
GCA_000007225.1_CAS_Cluster_7	CasFinder	CAS_Cluster	AAL62543.1	AAL62549.1	AAL62543.1,AAL62546.1,AAL62547.1,AAL62548.1,AAL62549.1	5	cas6_I_II_III_IV_V_VI_15,cas4_I_II_III_IV_V_VI_1,cas2_I_II_III_IV_V_VI_5,cas1_I_II_III_IV_V_VI_8,cas4_I_II_III_IV_V_VI_7
GCA_000007305.1_ShosTA_1	ShosTA	ShosTA	AAL81436.1	AAL81437.1	AAL81436.1,AAL81437.1	2	ShosTA__ShosT,ShosTA__ShosA
GCA_000007305.1_pAgo_2	pAgo	pAgo	AAL80661.1	AAL80661.1	AAL80661.1	1	pAgo__COG1431_pAgo
GCA_000007305.1_CAS_Class1-Subtype-I-A_3	CasFinder	CAS_Class1-Subtype-I-A	AAL80761.1	AAL80768.1	AAL80761.1,AAL80762.1,AAL80763.1,AAL80764.1,AAL80765.1,AAL80766.1,AAL80767.1,AAL80768.1	8	cas8a2_I-A_2,cas8a2_I-A_2,cas3HD_I_2,cas3_I_5,cas5_I-A_4,cas7_I-A_1,csa5gr11_I-A_9,casR_I_2
GCA_000007305.1_CAS_Class1-Subtype-I-B_4	CasFinder	CAS_Class1-Subtype-I-B	AAL81241.1	AAL81247.1	AAL81241.1,AAL81242.1,AAL81243.1,AAL81244.1,AAL81245.1,AAL81246.1,AAL81247.1	7	cas2_I_II_III_IV_V_VI_5,cas1_I_II_III_IV_V_VI_7,cas4_I_II_III_IV_V_VI_6,cas3_I_5,cas5_I-B_1,cas7_I-B_6,cas8b2_I-B_2
GCA_000007305.1_CAS_Class1-Subtype-III-B_5	CasFinder	CAS_Class1-Subtype-III-B	AAL81248.1	AAL81255.1	AAL81248.1,AAL81249.1,AAL81250.1,AAL81251.1,AAL81252.1,AAL81253.1,AAL81254.1,AAL81255.1	8	cmr6gr7_III-B_2,cmr5gr11_III-B_3,cmr4gr7_III-B_III-C_1,csx1_III_2,cmr3gr5_III-B_III-C_4,cas10_III_6,cmr1gr7_III-B_III-C_3,cas6_I_II_III_IV_V_VI_10
GCA_000007345.1_CAS_Class1-Subtype-I-B_10	CasFinder	CAS_Class1-Subtype-I-B	AAM07020.1	AAM07027.1	AAM07020.1,AAM07021.1,AAM07022.1,AAM07023.1,AAM07024.1,AAM07025.1,AAM07026.1,AAM07027.1	8	cas3_I_5,cas5_I-B_1,cas7_I-B_6,cas8b2_I-B_2,cas2_I_II_III_IV_V_VI_5,cas1_I_II_III_IV_V_VI_7,cas4_I_II_III_IV_V_VI_6,cas6_I_II_III_IV_V_VI_10
GCA_000007345.1_Gabija_1	Gabija	Gabija	AAM05269.1	AAM05271.1	AAM05269.1,AAM05271.1	2	Gabija__GajB_2,Gabija__GajA
GCA_000007345.1_Gabija_2	Gabija	Gabija	AAM05537.1	AAM05538.1	AAM05537.1,AAM05538.1	2	Gabija__GajA,Gabija__GajB_1
GCA_000007345.1_BREX_I_4	BREX	BREX_I	AAM05752.1	AAM05761.1	AAM05752.1,AAM05753.1,AAM05759.1,AAM05760.1,AAM05761.1	5	BREX__brxL,BREX__pglZA,BREX__pglX1,BREX__brxC,BREX__brxB_DUF1788
GCA_000007345.1_Pycsar_5	Pycsar	Pycsar	AAM04974.1	AAM04975.1	AAM04974.1,AAM04975.1	2	CBASS__2TM_5,Pycsar__AG_cyclase
GCA_000007345.1_pAgo_6	pAgo	pAgo	AAM04411.1	AAM04411.1	AAM04411.1	1	pAgo__pAgo_Short
GCA_000007345.1_RM_Type_I_7	RM	RM_Type_I	AAM05514.1	AAM05520.1	AAM05514.1,AAM05518.1,AAM05520.1	3	RM__Type_I_MTases,RM__Type_I_S,RM__Type_I_REases
GCA_000007345.1_RM_Type_I_8	RM	RM_Type_I	AAM05800.1	AAM05804.1	AAM05800.1,AAM05801.1,AAM05804.1	3	RM__Type_I_MTases,RM__Type_I_S,RM__Type_I_REases
GCA_000007345.1_RM_Type_IV_9	RM	RM_Type_IV	AAM07880.1	AAM07880.1	AAM07880.1	1	RM_Type_IV__Type_IV_REases
GCA_000007345.1_CAS_Class1-Subtype-III-A_11	CasFinder	CAS_Class1-Subtype-III-A	AAM05332.1	AAM05339.1	AAM05332.1,AAM05335.1,AAM05336.1,AAM05337.1,AAM05338.1,AAM05339.1	6	cas6_I_II_III_IV_V_VI_12,cas10_III_7,csm2gr11_III-A_1,csm3gr7_III-A_1,csm4gr5_III-A_3,csm5gr7_III-A_2
GCA_000008085.1_CAS_Class1-Subtype-I-B_1	CasFinder	CAS_Class1-Subtype-I-B	AAR38871.1	AAR38877.1	AAR38871.1,AAR38872.1,AAR38874.1,AAR38875.1,AAR38876.1,AAR38877.1	6	cas2_I_II_III_IV_V_VI_3,cas1_I_II_III_IV_V_VI_7,cas7_I-B_6,cas5_I-B_8,cas3_I_2,cas4_I_II_III_IV_V_VI_6
GCA_000008265.1_AbiE_1	AbiE	AbiE	AAT42618.1	AAT42619.1	AAT42618.1,AAT42619.1	2	AbiEii__AbiEi_4,AbiEii__AbiEii
GCA_000008265.1_RM_Type_I_2	RM	RM_Type_I	AAT42661.1	AAT42663.1	AAT42661.1,AAT42662.1,AAT42663.1	3	RM__Type_I_REases,RM__Type_I_S,RM__Type_I_MTases
GCA_000008265.1_RM_Type_II_3	RM	RM_Type_II	AAT43170.1	AAT43171.1	AAT43170.1,AAT43171.1	2	RM_Type_II__Type_II_MTases,RM_Type_II__Type_II_REases
GCA_000008265.1_RM_Type_IV_4	RM	RM_Type_IV	AAT42613.1	AAT42613.1	AAT42613.1	1	RM_Type_IV__Type_IV_REases
GCA_000008265.1_CAS_Class1-Subtype-I-D_5	CasFinder	CAS_Class1-Subtype-I-D	AAT42587.1	AAT42594.1	AAT42587.1,AAT42588.1,AAT42589.1,AAT42590.1,AAT42591.1,AAT42592.1,AAT42593.1,AAT42594.1	8	cas2_I_II_III_IV_V_VI_3,cas1_I_II_III_IV_V_VI_7,cas4_I_II_III_IV_V_VI_6,cas3_I-D_4,csc1gr5_I-D_2,csc2gr7_I-D_1,cas10d_I-D_5,cas6_I_II_III_IV_V_VI_7
GCA_000008265.1_CAS_Class1-Subtype-III-A_6	CasFinder	CAS_Class1-Subtype-III-A	AAT42633.1	AAT42643.1	AAT42633.1,AAT42634.1,AAT42635.1,AAT42636.1,AAT42637.1,AAT42638.1,AAT42639.1,AAT42641.1,AAT42642.1,AAT42643.1	10	cas2_I_II_III_IV_V_VI_5,cas1_I_II_III_IV_V_VI_7,csm5gr7_III-A_2,csm4gr5_III-A_1,csm3gr7_III-A_1,cas10_III-A_1,cas6_I_II_III_IV_V_VI_14,csx1_III_7,csx1_III_8,csx1_III_8
GCA_000008645.1_RM_Type_I_1	RM	RM_Type_I	AAB85438.1	AAB85440.1	AAB85438.1,AAB85439.1,AAB85440.1	3	RM__Type_I_REases,RM__Type_I_S,RM__Type_I_MTases
GCA_000008645.1_RM_Type_IV_2	RM	RM_Type_IV	AAB85007.1	AAB85007.1	AAB85007.1	1	RM_Type_IV__Type_IV_REases
GCA_000008645.1_CAS_Class1-Subtype-I-B_3	CasFinder	CAS_Class1-Subtype-I-B	AAB85572.1	AAB85580.1	AAB85572.1,AAB85573.1,AAB85574.1,AAB85575.1,AAB85576.1,AAB85577.1,AAB85578.1,AAB85579.1,AAB85580.1	9	cas2_I_II_III_IV_V_VI_5,cas1_I_II_III_IV_V_VI_7,cas4_I_II_III_IV_V_VI_6,cas3_I_5,cas5_I-B_6,cas7_I-B_6,cas11b_I-B_3,cas8b10_I-B_1,cas6_I_II_III_IV_V_VI_14
GCA_000008645.1_CAS_Class1-Subtype-III-A_4	CasFinder	CAS_Class1-Subtype-III-A	AAB85565.1	AAB85574.1	AAB85565.1,AAB85567.1,AAB85568.1,AAB85569.1,AAB85570.1,AAB85571.1,AAB85572.1,AAB85573.1,AAB85574.1	9	csx1_III_21,csm5gr7_III-A_3,csm4gr5_III-A_3,csm3gr7_III-A_1,csm2gr11_III-A_3,cas10_III_7,cas2_I_II_III_IV_V_VI_5,cas1_I_II_III_IV_V_VI_7,cas4_I_II_III_IV_V_VI_6
GCA_000008645.1_CAS_Class1-Subtype-III-C_5	CasFinder	CAS_Class1-Subtype-III-C	AAB84829.1	AAB84834.1	AAB84829.1,AAB84830.1,AAB84831.1,AAB84832.1,AAB84833.1,AAB84834.1	6	cmr3gr5_III-C_1,cmr5gr11_III-C_11,cmr4gr7_III-B_III-C_2,cas10_III-C_3,cmr6gr7_III-C_1,cmr1gr7_III-B_III-C_3
GCA_000008665.1_CAS_Cluster_10	CasFinder	CAS_Cluster	AAB91227.1	AAB91229.1	AAB91227.1,AAB91228.1,AAB91229.1	3	cas4_I_II_III_IV_V_VI_6,cas1_I_II_III_IV_V_VI_7,cas2_I_II_III_IV_V_VI_5
GCA_000008665.1_pAgo_1	pAgo	pAgo	AAB89939.1	AAB89939.1	AAB89939.1	1	pAgo__COG1431_pAgo
GCA_000008665.1_CAS_Class1-Subtype-I-A_2	CasFinder	CAS_Class1-Subtype-I-A	AAB89374.1	AAB89388.1	AAB89374.1,AAB89375.1,AAB89376.1,AAB89377.1,AAB89380.1,AAB89381.1,AAB89382.1,AAB89383.1,AAB89384.1,AAB89385.1,AAB89388.1	11	cas1_I_II_III_IV_V_VI_8,cas4_I_II_III_IV_V_VI_1,cas2_I_II_III_IV_V_VI_5,cas7_I-A_1,cas4_I-A_1,cas3HD_I_3,cas3_I_5,cas8a1_I-A_4,cas5_I-A_1,csa5gr11_I-A_3,casR_I_2
GCA_000008665.1_CAS_Class1-Subtype-I-A_3	CasFinder	CAS_Class1-Subtype-I-A	AAB91169.1	AAB91170.1	AAB91169.1,AAB91170.1	2	cas8a2_I-A_4,cas5_I-A_15
GCA_000008665.1_CAS_Class1-Subtype-III-B_4	CasFinder	CAS_Class1-Subtype-III-B	AAB89387.1	AAB89396.1	AAB89387.1,AAB89389.1,AAB89390.1,AAB89391.1,AAB89392.1,AAB89393.1,AAB89394.1,AAB89395.1,AAB89396.1	9	csx1_III_12,cmr1gr7_III-B_1,cas10_III_6,cmr3gr5_III-B_III-C_6,cmr4gr7_III-B_III-C_2,cmr5gr11_III-B_8,cmr6gr7_III-B_3,cas6_I_II_III_IV_V_VI_11,csx3_I_III_1
GCA_000009185.1_RM_Type_II_1	RM	RM_Type_II	CAJ52098.1	CAJ52099.1	CAJ52098.1,CAJ52099.1	2	RM_Type_II__Type_II_MTases,RM_Type_II__Type_II_REases
GCA_000009185.1_RM_Type_IIG_2	RM	RM_Type_IIG	CAJ51104.2	CAJ51104.2	CAJ51104.2	1	RM_Type_IIG__Type_IIG
GCA_000009185.1_RM_Type_IIG_3	RM	RM_Type_IIG	CAJ53372.1	CAJ53372.1	CAJ53372.1	1	RM_Type_IIG__Type_IIG
GCA_000009965.1_RM_Type_IIG_1	RM	RM_Type_IIG	BAD85347.1	BAD85347.1	BAD85347.1	1	RM_Type_IIG__Type_IIG
GCA_000009965.1_RM_Type_IIG_2	RM	RM_Type_IIG	BAD85649.1	BAD85649.1	BAD85649.1	1	RM_Type_IIG__Type_IIG
GCA_000009965.1_RM_Type_IV_3	RM	RM_Type_IV	BAD84984.1	BAD84984.1	BAD84984.1	1	RM_Type_IV__Type_IV_REases
GCA_000009965.1_RM_Type_IV_4	RM	RM_Type_IV	BAD85198.1	BAD85198.1	BAD85198.1	1	RM_Type_IV__Type_IV_REases
GCA_000009965.1_CAS_Class1-Subtype-I-A_5	CasFinder	CAS_Class1-Subtype-I-A	BAD84634.1	BAD84653.1	BAD84634.1,BAD84636.1,BAD84637.1,BAD84638.1,BAD84639.1,BAD84640.1,BAD84641.1,BAD84642.1,BAD84643.1,BAD84644.1,BAD84647.1,BAD84649.1,BAD84653.1	13	cas2_I_II_III_IV_V_VI_5,cas6_I_II_III_IV_V_VI_10,casR_I_2,cas3HD_I_3,cas3_I_5,cas8a1_I-A_5,cas5_I-A_12,cas7_I-A_1,csa5gr11_I-A_4,cas1_I_II_III_IV_V_VI_7,cas4_I_II_III_IV_V_VI_6,cas3_I_5,cas6_I_II_III_IV_V_VI_10
GCA_000009965.1_CAS_Class1-Subtype-I-B_6	CasFinder	CAS_Class1-Subtype-I-B	BAD84644.1	BAD84653.1	BAD84644.1,BAD84647.1,BAD84649.1,BAD84650.1,BAD84651.1,BAD84652.1,BAD84653.1	7	cas1_I_II_III_IV_V_VI_7,cas4_I_II_III_IV_V_VI_6,cas3_I_5,cas5_I-B_1,cas7_I-B_6,cas8b2_I-B_2,cas6_I_II_III_IV_V_VI_10
GCA_000011085.1_pAgo_1	pAgo	pAgo	AAV44560.1	AAV44560.1	AAV44560.1	1	pAgo__pAgo_Short
GCA_000011085.1_RM_Type_IV_2	RM	RM_Type_IV	AAV47206.1	AAV47206.1	AAV47206.1	1	RM_Type_IV__Type_IV_REases
GCA_000011085.1_CAS_Class1-Subtype-I-B_3	CasFinder	CAS_Class1-Subtype-I-B	AAV44420.1	AAV44427.1	AAV44420.1,AAV44421.1,AAV44422.1,AAV44423.1,AAV44424.1,AAV44425.1,AAV44426.1,AAV44427.1	8	cas6_I_II_III_IV_V_VI_7,cas8b1_I-B_3,cas7_I-B_8,cas5_I-B_17,cas3HD_I_1,cas4_I_II_III_IV_V_VI_6,cas1_I_II_III_IV_V_VI_7,cas2_I_II_III_IV_V_VI_3
GCA_000011105.1_RM_Type_IV_1	RM	RM_Type_IV	BAA29967.1	BAA29967.1	BAA29967.1	1	RM_Type_IV__Type_IV_REases
GCA_000011105.1_CAS_Class1-Subtype-I-A_2	CasFinder	CAS_Class1-Subtype-I-A	BAA30011.1	BAA30017.1	BAA30011.1,BAA30012.1,BAA30013.1,BAA30014.1,BAA30015.1,BAA30016.1,BAA30017.1	7	casR_I_2,cas3HD_I_3,cas3_I_5,cas8a1_I-A_1,cas5_I-A_1,cas7_I-A_2,csa5gr11_I-A_3
GCA_000011105.1_CAS_Class1-Subtype-I-B_3	CasFinder	CAS_Class1-Subtype-I-B	BAA29238.1	BAA29245.1	BAA29238.1,BAA29239.1,BAA29240.1,BAA29242.1,BAA29244.1,BAA29245.1	6	cas8b2_I-B_7,cas7_I-B_6,cas5_I-B_6,cas1_I_II_III_IV_V_VI_7,cas4_I_II_III_IV_V_VI_6,cas3_I_5
GCA_000011105.1_CAS_Class1-Subtype-I-B_4	CasFinder	CAS_Class1-Subtype-I-B	BAA30345.1	BAA30353.1	BAA30345.1,BAA30346.1,BAA30347.1,BAA30350.1,BAA30351.1,BAA30352.1,BAA30353.1	7	cas1_I_II_III_IV_V_VI_7,cas4_I_II_III_IV_V_VI_6,cas3_I_5,cas5_I-B_1,cas7_I-B_6,cas8b2_I-B_2,cas6_I_II_III_IV_V_VI_10
GCA_000011105.1_CAS_Class1-Subtype-III-A_5	CasFinder	CAS_Class1-Subtype-III-A	BAA29230.1	BAA29237.1	BAA29230.1,BAA29231.1,BAA29233.1,BAA29234.1,BAA29235.1,BAA29236.1,BAA29237.1	7	cas6_I_II_III_IV_V_VI_14,cas10_III_7,csm2gr11_III-A_3,csm3gr7_III-A_III-D_10,csm4gr5_III-A_1,csm5gr7_III-A_3,csm6_III_5
GCA_000011125.1_RM_Type_II_1	RM	RM_Type_II	BAA79854.2	BAA79856.2	BAA79854.2,BAA79856.2	2	RM_Type_II__Type_II_MTases,RM_Type_II__Type_II_REases
GCA_000011125.1_CAS_Class1-Subtype-I-A_2	CasFinder	CAS_Class1-Subtype-I-A	BAA80217.2	BAA80230.2	BAA80217.2,BAA80219.1,BAA80220.1,BAA80221.1,BAA80223.2,BAA80224.1,BAA80225.2,BAA80226.2,BAA80228.2,BAA80229.2,BAA80230.2	11	cas6_I_II_III_IV_V_VI_22,cas8a2_I-A_2,cas3HD_I_3,cas3_I_5,cas5_I-A_1,cas7_I-A_1,csa5gr11_I-A_6,casR_I_1,cas4_I_II_III_IV_V_VI_1,cas1_I_II_III_IV_V_VI_8,cas4_I-A_1
GCA_000011185.1_RM_Type_II_1	RM	RM_Type_II	BAB60580.1	BAB60584.1	BAB60580.1,BAB60581.1,BAB60584.1	3	RM_Type_II__Type_II_MTases,RM_Type_II__Type_II_REases,RM_Type_II__Type_II_MTases
GCA_000011185.1_RM_Type_III_2	RM	RM_Type_III	BAB60631.1	BAB60632.1	BAB60631.1,BAB60632.1	2	RM_Type_III__Type_III_REases,RM_Type_III__Type_III_MTases
GCA_000011185.1_CAS_Class1-Subtype-III-A_3	CasFinder	CAS_Class1-Subtype-III-A	BAB59246.1	BAB59255.1	BAB59246.1,BAB59247.1,BAB59248.1,BAB59249.1,BAB59250.1,BAB59251.1,BAB59252.1,BAB59253.1,BAB59254.1,BAB59255.1	10	cas2_I_II_III_IV_V_VI_5,cas1_I_II_III_IV_V_VI_7,csx1_III_7,csm5gr7_III-A_3,csm4gr5_III-A_3,csm3gr7_III-A_1,csm2gr11_III-A_3,cas10_III_7,cas6_I_II_III_IV_V_VI_14,csm6_III_5
GCA_000011205.1_pAgo_1	pAgo	pAgo	BAB67041.1	BAB67041.1	BAB67041.1	1	pAgo__pAgo_LongB
GCA_000011205.1_CAS_Class1-Subtype-I-A_2	CasFinder	CAS_Class1-Subtype-I-A	BAB64972.1	BAB64985.1	BAB64972.1,BAB64977.1,BAB64978.1,BAB64979.1,BAB64980.2,BAB64981.1,BAB64982.1,BAB64984.1,BAB64985.1	9	cas4_I_II_III_IV_V_VI_1,cas1_I_II_III_IV_V_VI_2,cas4_I_II_III_IV_V_VI_7,csa5gr11_I-A_5,cas7_I-A_1,cas5_I-A_12,cas8a7_I-A_1,cas3HD_I_2,cas6_I_II_III_IV_V_VI_15
GCA_000011205.1_CAS_Class1-Subtype-I-A_3	CasFinder	CAS_Class1-Subtype-I-A	BAB67752.1	BAB67762.1	BAB67752.1,BAB67755.1,BAB67758.1,BAB67759.1,BAB67760.1,BAB67762.1	6	cas4_I-A_2,cas4_I_II_III_IV_V_VI_1,csa5gr11_I-A_12,cas7_I-A_1,cas5_I-A_12,cas3HD_I_2
GCA_000011205.1_CAS_Class1-Subtype-I-A_4	CasFinder	CAS_Class1-Subtype-I-A	BAK54837.1	BAK54842.1	BAK54837.1,BAK54838.1,BAK54839.1,BAK54840.1,BAK54841.1,BAK54842.1	6	casR_I_2,cas1_I_II_III_IV_V_VI_2,cas2_I_II_III_IV_V_VI_9,cas3_I_5,cas8a1_I-A_2,cas6_I_II_III_IV_V_VI_22
GCA_000011205.1_CAS_Class1-Subtype-III-A_5	CasFinder	CAS_Class1-Subtype-III-A	BAB67083.1	BAB67088.1	BAB67083.1,BAB67084.1,BAB67087.1,BAB67088.1	4	cas10_III-A_2,csm4gr5_III-A_5,csx26_III_1,csm3gr7_III-A_2
GCA_000011205.1_CAS_Class1-Subtype-III-B_6	CasFinder	CAS_Class1-Subtype-III-B	BAB67070.1	BAB67074.1	BAB67070.1,BAB67071.1,BAB67072.1,BAB67074.1	4	cmr4gr7_III-B_III-C_1,cmr5gr11_III-B_3,cmr1gr7_III-B_III-C_3,cas10_III_6
GCA_000011205.1_CAS_Class1-Subtype-III-B_7	CasFinder	CAS_Class1-Subtype-III-B	BAK54699.1	BAK54700.1	BAK54699.1,BAK54700.1	2	cmr6gr7_III-B_2,cmr3gr5_III-B_III-C_4
GCA_000011205.1_CAS_Class1-Subtype-III-D_8	CasFinder	CAS_Class1-Subtype-III-D	BAB64953.1	BAB64978.1	BAB64953.1,BAB64956.1,BAB64957.1,BAB64959.1,BAB64961.1,BAB64963.1,BAB64968.1,BAB64972.1,BAB64977.1,BAB64978.1	10	cas6_I-A_III-D_3,csm3gr7_III-A_III-D_2,csm3gr7_III-A_III-D_2,csm3gr7_III_1,csm3gr7_III-A_III-D_10,csm3gr7_III-D_1,csx1_III_19,cas4_I_II_III_IV_V_VI_1,cas1_I_II_III_IV_V_VI_2,cas4_I_II_III_IV_V_VI_7
GCA_000011205.1_CAS_Class1-Subtype-III-D_9	CasFinder	CAS_Class1-Subtype-III-D	BAK54121.1	BAK54125.1	BAK54121.1,BAK54122.1,BAK54125.1	3	csm2gr11_III-D_8,csx10gr5_III-D_5,cas2_I_II_III_IV_V_VI_5
GCA_000011585.1_Shedu_1	Shedu	Shedu	CAF30310.1	CAF30310.1	CAF30310.1	1	Shedu__SduA
GCA_000011585.1_SoFic_2	SoFIC	SoFic	CAF30298.1	CAF30298.1	CAF30298.1	1	SoFic__SoFic
GCA_000012285.1_CAS_Cluster_10	CasFinder	CAS_Cluster	AAY81307.1	AAY81311.1	AAY81307.1,AAY81309.1,AAY81310.1,AAY81311.1	4	cas6_I_II_III_IV_V_VI_15,cas2_I_II_III_IV_V_VI_3,cas1_I_II_III_IV_V_VI_2,cas4_I_II_III_IV_V_VI_1
GCA_000012285.1_RM_Type_II_1	RM	RM_Type_II	AAY81277.1	AAY81278.1	AAY81277.1,AAY81278.1	2	RM_Type_II__Type_II_MTases,RM_Type_II__Type_II_REases
GCA_000012285.1_CAS_Class1-Subtype-I-D_2	CasFinder	CAS_Class1-Subtype-I-D	AAY81177.1	AAY81186.1	AAY81177.1,AAY81178.1,AAY81179.1,AAY81180.1,AAY81181.1,AAY81182.1,AAY81184.1,AAY81185.1,AAY81186.1	9	cas3d_I-D_1,csc1gr5_I-D_4,csc2gr7_I-D_1,cas10d_I-D_4,casR_I_2,cas6_I-D_2,cas2_I_II_III_IV_V_VI_9,cas4_I-D_1,cas1_I_II_III_IV_V_VI_1
GCA_000012285.1_CAS_Class1-Subtype-III-A_3	CasFinder	CAS_Class1-Subtype-III-A	AAY81196.1	AAY81202.1	AAY81196.1,AAY81198.1,AAY81199.1,AAY81200.1,AAY81201.1,AAY81202.1	6	csm3gr7_III_IV,PEPT_D_III-A_1,csm3gr7_III-A_2,csx26_III_1,csm4gr5_III-A_5,cas10_III-A_2
GCA_000012285.1_CAS_Class1-Subtype-III-D_4	CasFinder	CAS_Class1-Subtype-III-D	AAY81339.1	AAY81346.1	AAY81339.1,AAY81340.1,AAY81341.1,AAY81345.1,AAY81346.1	5	csm3gr7_III-D_1,csx10gr5_III-D_5,csm3gr7_III-A_III-D_10,csm3gr7_III-A_III-D_2,csm2gr11_III-D_8
GCA_000012545.1_RM_Type_I_1	RM	RM_Type_I	ABC56877.1	ABC56884.1	ABC56877.1,ABC56879.1,ABC56880.1,ABC56884.1	4	RM__Type_I_REases,RM__Type_I_MTases,RM__Type_I_S,RM__Type_I_S
GCA_000012545.1_RM_Type_II_2	RM	RM_Type_II	ABC56561.1	ABC56562.1	ABC56561.1,ABC56562.1	2	RM_Type_II__Type_II_MTases,RM_Type_II__Type_II_REases
GCA_000012545.1_RM_Type_III_3	RM	RM_Type_III	ABC56870.1	ABC56873.1	ABC56870.1,ABC56873.1	2	RM_Type_III__Type_III_MTases,RM_Type_III__Type_III_REases
GCA_000012545.1_CAS_Class1-Subtype-I-B_4	CasFinder	CAS_Class1-Subtype-I-B	ABC56819.1	ABC56826.1	ABC56819.1,ABC56820.1,ABC56821.1,ABC56822.1,ABC56823.1,ABC56824.1,ABC56825.1,ABC56826.1	8	cas6_I_II_III_IV_V_VI_14,cas8b1_I-B_4,cas7_I-B_8,cas5_I-B_17,cas3_I_5,cas4_I_II_III_IV_V_VI_6,cas1_I_II_III_IV_V_VI_7,cas2_I_II_III_IV_V_VI_3
GCA_000012545.1_CAS_Class1-Subtype-I-B_5	CasFinder	CAS_Class1-Subtype-I-B	ABC57328.1	ABC57335.1	ABC57328.1,ABC57329.1,ABC57330.1,ABC57331.1,ABC57332.1,ABC57333.1,ABC57334.1,ABC57335.1	8	cas8b1_I-B_5,cas7b_I-B_I-C_2,cas5_I-B_17,cas3_I_5,cas6_I_II_III_IV_V_VI_10,cas4_I_II_III_IV_V_VI_6,cas1_I_II_III_IV_V_VI_7,cas2_I_II_III_IV_V_VI_5
GCA_000013445.1_BREX_I_2	BREX	BREX_I	ABD40826.1	ABD40833.1	ABD40826.1,ABD40827.1,ABD40830.1,ABD40832.1,ABD40833.1	5	BREX__brxL,BREX__pglZB,BREX__pglX1,BREX__brxC,BREX__brxB_DUF1788
GCA_000013445.1_SoFic_3	SoFIC	SoFic	ABD41453.1	ABD41453.1	ABD41453.1	1	SoFic__SoFic
GCA_000013445.1_RM_Type_IIG_4	RM	RM_Type_IIG	ABD41610.1	ABD41610.1	ABD41610.1	1	RM_Type_IIG__Type_IIG
GCA_000013445.1_CAS_Class1-Subtype-I-D_5	CasFinder	CAS_Class1-Subtype-I-D	ABD41574.1	ABD41583.1	ABD41574.1,ABD41575.1,ABD41576.1,ABD41578.1,ABD41579.1,ABD41580.1,ABD41581.1,ABD41582.1,ABD41583.1	9	cas2_I_II_III_IV_V_VI_3,cas1_I_II_III_IV_V_VI_1,cas4_I_II_III_IV_V_VI_1,cas3_I-D_4,csc1gr5_I-D_2,csc2gr7_I-D_1,cas10d_I-D_3,cas6_I_II_III_IV_V_VI_22,casR_I_2
GCA_000013445.1_CAS_Class1-Subtype-I-E_6	CasFinder	CAS_Class1-Subtype-I-E	ABD41114.1	ABD41120.1	ABD41114.1,ABD41115.1,ABD41116.1,ABD41117.1,ABD41118.1,ABD41119.1,ABD41120.1	7	cas2_I-E_1,cas1_I-E_1,cas6e_I_II_III_IV_V_VI_2,cas5_I-E_3,cas7_I-E_16,cse2gr11_I-E_2,cas8e_I-E_2
GCA_000013445.1_CAS_Class1-Subtype-III-D_7	CasFinder	CAS_Class1-Subtype-III-D	ABD40483.1	ABD40499.1	ABD40483.1,ABD40484.1,ABD40487.1,ABD40488.1,ABD40492.1,ABD40493.1,ABD40494.1,ABD40497.1,ABD40498.1,ABD40499.1	10	csx1_III_9,csx1_III_9,cas2_I_II_III_IV_V_VI_3,cas1_I_II_III_IV_V_VI_1,csm3gr7_III-A_III-D_10,csm3gr7_III-A_III-D_2,csm2gr11_III-D_4,csm3gr7_III_1,cas10_III-D_3,cas6_I_II_III_IV_V_VI_22
GCA_000013725.1_Gabija_1	Gabija	Gabija	ABE51714.1	ABE51715.1	ABE51714.1,ABE51715.1	2	Gabija__GajA,Gabija__GajB_2
GCA_000013725.1_Kiwa_2	Kiwa	Kiwa	ABE52138.1	ABE52139.1	ABE52138.1,ABE52139.1	2	Kiwa__KwaB_2,Kiwa__KwaA
GCA_000013725.1_Shedu_3	Shedu	Shedu	ABE51549.1	ABE51549.1	ABE51549.1	1	Shedu__SduA
GCA_000013725.1_PARIS_I_4	Rst_PARIS	PARIS_I	ABE52545.1	ABE52546.1	ABE52545.1,ABE52546.1	2	PARIS_I__AAA_15,Rst_PARIS__DUF4435
GCA_000013725.1_SoFic_5	SoFIC	SoFic	ABE52143.1	ABE52143.1	ABE52143.1	1	SoFic__SoFic
GCA_000013725.1_RM_Type_I_6	RM	RM_Type_I	ABE52135.1	ABE52144.1	ABE52135.1,ABE52140.1,ABE52144.1	3	RM__Type_I_REases,RM__Type_I_S,RM__Type_I_MTases
GCA_000013725.1_RM_Type_I_7	RM	RM_Type_I	ABE52724.1	ABE52726.1	ABE52724.1,ABE52725.1,ABE52726.1	3	RM__Type_I_REases,RM__Type_I_S,RM__Type_I_MTases
GCA_000013725.1_CAS_Class1-Subtype-I-B_8	CasFinder	CAS_Class1-Subtype-I-B	ABE52047.1	ABE52054.1	ABE52047.1,ABE52049.1,ABE52050.1,ABE52051.1,ABE52052.1,ABE52053.1,ABE52054.1	7	cas6_I_II_III_IV_V_VI_10,cas7b_I-B_I-C_2,cas5_I-B_8,cas3_I_5,cas4_I_II_III_IV_V_VI_6,cas1_I_II_III_IV_V_VI_7,cas2_I_II_III_IV_V_VI_5
GCA_000013725.1_CAS_Class1-Subtype-I-E_9	CasFinder	CAS_Class1-Subtype-I-E	ABE51564.1	ABE51571.1	ABE51564.1,ABE51565.1,ABE51566.1,ABE51567.1,ABE51568.1,ABE51569.1,ABE51570.1,ABE51571.1	8	cas3_I_5,cas8e_I-E_2,cse2gr11_I-E_2,cas7_I-E_2,cas5_I-E_3,cas6e_I_II_III_IV_V_VI_3,cas1_I-E_1,cas2_I-E_1
GCA_000014945.1_CAS_Class1-Subtype-I-B_1	CasFinder	CAS_Class1-Subtype-I-B	ABK14426.1	ABK14432.1	ABK14426.1,ABK14427.1,ABK14428.1,ABK14429.1,ABK14430.1,ABK14431.1,ABK14432.1	7	cas2_I_II_III_IV_V_VI_3,cas4_I_II_III_IV_V_VI_1,cas8b1_I-B_4,cas7_I-B_8,cas5_I-B_17,cas3_I_5,cas6_I_II_III_IV_V_VI_12
GCA_000014945.1_CAS_Class1-Subtype-I-D_2	CasFinder	CAS_Class1-Subtype-I-D	ABK15325.1	ABK15332.1	ABK15325.1,ABK15326.1,ABK15327.1,ABK15328.1,ABK15329.1,ABK15330.1,ABK15331.1,ABK15332.1	8	csc2gr7_I-D_1,csc1gr5_I-D_2,cas3_I-D_4,cas4_I_II_III_IV_V_VI_6,cas1_I_II_III_IV_V_VI_1,cas2_I_II_III_IV_V_VI_3,casR_I_2,cas6_I_II_III_IV_V_VI_22
GCA_000014945.1_CAS_Class1-Subtype-III-B_3	CasFinder	CAS_Class1-Subtype-III-B	ABK14432.1	ABK14441.1	ABK14432.1,ABK14433.1,ABK14435.1,ABK14436.1,ABK14437.1,ABK14438.1,ABK14439.1,ABK14440.1,ABK14441.1	9	cas6_I_II_III_IV_V_VI_12,csx3_I_III_2,cmr6gr7_III-B_2,cmr5gr11_III-B_4,cmr4gr7_III-B_III-C_1,cmr3gr5_III-B_III-C_5,cas10_III_1,cmr1gr7_III-B_1,csx1_III_9
GCA_000015145.1_CAS_Class1-Subtype-I-A_1	CasFinder	CAS_Class1-Subtype-I-A	ABM80496.1	ABM80509.1	ABM80496.1,ABM80497.1,ABM80499.1,ABM80500.1,ABM80501.1,ABM80502.1,ABM80503.1,ABM80506.1,ABM80507.1,ABM80508.1,ABM80509.1	11	cas3HD_I_1,cas3_I_2,cas8a6_I-A_1,cas5_I-A_4,cas7_I_15,csa5gr11_I-A_4,casR_I_2,cas4_I_II_III_IV_V_VI_1,cas2_I_II_III_IV_V_VI_9,cas4_I-A_2,cas1_I_II_III_IV_V_VI_1
GCA_000015145.1_CAS_Class1-Subtype-III-B_2	CasFinder	CAS_Class1-Subtype-III-B	ABM80564.1	ABM80570.1	ABM80564.1,ABM80565.1,ABM80566.1,ABM80567.1,ABM80568.1,ABM80569.1,ABM80570.1	7	csx1_III_8,cmr4gr7_III-B_III-C_2,cmr5gr11_III-B_15,cmr1gr7_III-B_III-C_3,cmr6gr7_III-B_3,cas10_III_1,cmr3gr5_III-B_III-C_1
GCA_000015205.1_CAS_Class1-Subtype-III-A_1	CasFinder	CAS_Class1-Subtype-III-A	ABL88697.1	ABL88699.1	ABL88697.1,ABL88698.1,ABL88699.1	3	csm5gr7_III-A_2,csm4gr5_III-A_3,csm3gr7_III-A_III-D_10
GCA_000015225.1_CAS_Class1-Subtype-I-A_1	CasFinder	CAS_Class1-Subtype-I-A	ABL78750.1	ABL78757.1	ABL78750.1,ABL78751.1,ABL78752.1,ABL78753.1,ABL78755.1,ABL78757.1	6	cas3HD_I_2,cas3_I_5,cas8a2_I-A_6,cas7_I_15,casR_I_1,cas6_I_II_III_IV_V_VI_22
GCA_000015225.1_CAS_Class1-Subtype-I-D_2	CasFinder	CAS_Class1-Subtype-I-D	ABL78718.1	ABL78722.1	ABL78718.1,ABL78719.1,ABL78720.1,ABL78721.1,ABL78722.1	5	cas1_I_II_III_IV_V_VI_1,cas2_I_II_III_IV_V_VI_9,cas3d_I-D_1,csc1gr5_I-D_4,csc2gr7_I-D_1
GCA_000015225.1_CAS_Class1-Subtype-III-A_3	CasFinder	CAS_Class1-Subtype-III-A	ABL78757.1	ABL78762.1	ABL78757.1,ABL78761.1,ABL78762.1	3	cas6_I_II_III_IV_V_VI_22,csm3gr7_III-A_III-D_10,csm2gr11_III-A_12
GCA_000015225.1_CAS_Class1-Subtype-III-B_4	CasFinder	CAS_Class1-Subtype-III-B	ABL78713.1	ABL78719.1	ABL78713.1,ABL78714.1,ABL78715.1,ABL78716.1,ABL78717.1,ABL78718.1,ABL78719.1	7	cas10_III_1,cmr6gr7_III-B_3,cmr1gr7_III-B_3,cmr5gr11_III-B_6,cmr4gr7_III-B_III-C_1,cas1_I_II_III_IV_V_VI_1,cas2_I_II_III_IV_V_VI_9
GCA_000015225.1_CAS_Class1-Subtype-III-D_5	CasFinder	CAS_Class1-Subtype-III-D	ABL78685.1	ABL78691.1	ABL78685.1,ABL78686.1,ABL78690.1,ABL78691.1	4	csm3gr7_III-A_III-D_2,csm3gr7_III-A_III-D_2,csx10gr5_III-D_5,csm3gr7_III_1
GCA_000015765.1_RloC_1	RloC	RloC	ABN06211.1	ABN06211.1	ABN06211.1	1	RloC__RloC
GCA_000015765.1_SanaTA_2	SanaTA	SanaTA	ABN07060.1	ABN07061.1	ABN07060.1,ABN07061.1	2	SanaTA__SanaA,SanaTA__SanaT
GCA_000015765.1_RM_Type_I_3	RM	RM_Type_I	ABN07012.1	ABN07014.1	ABN07012.1,ABN07013.1,ABN07014.1	3	RM__Type_I_MTases,RM__Type_I_S,RM__Type_I_REases
GCA_000015765.1_RM_Type_II_4	RM	RM_Type_II	ABN07350.1	ABN07352.1	ABN07350.1,ABN07352.1	2	RM_Type_II__Type_II_REases,RM_Type_II__Type_II_MTases
GCA_000015765.1_RM_Type_III_5	RM	RM_Type_III	ABN07369.1	ABN07370.1	ABN07369.1,ABN07370.1	2	RM_Type_III__Type_III_REases,RM_Type_III__Type_III_MTases
GCA_000015765.1_CAS_Class1-Subtype-I-C_6	CasFinder	CAS_Class1-Subtype-I-C	ABN07018.1	ABN07024.1	ABN07018.1,ABN07019.1,ABN07020.1,ABN07021.1,ABN07022.1,ABN07023.1,ABN07024.1	7	cas7_I-C_7,cas8c_I-C_4,cas5_I-C_11,cas3_I_5,cas4_I_II_III_IV_V_VI_6,cas1_I_II_III_IV_V_VI_6,cas2_I_II_III_IV_V_VI_3
GCA_000015805.1_RM_Type_IV_1	RM	RM_Type_IV	ABO09275.1	ABO09275.1	ABO09275.1	1	RM_Type_IV__Type_IV_REases
GCA_000015805.1_CAS_Class1-Subtype-I-A_2	CasFinder	CAS_Class1-Subtype-I-A	ABO08691.1	ABO08702.1	ABO08691.1,ABO08692.1,ABO08693.1,ABO08694.1,ABO08695.1,ABO08696.1,ABO08697.1,ABO08698.1,ABO08699.1,ABO08700.1,ABO08701.1,ABO08702.1	12	cas3HD_I_1,cas3_I_5,cas8a3_I-A_2,cas5a_I-A_1,cas7_I_15,csa5gr11_I-A_11,casR_I_2,cas4_I_II_III_IV_V_VI_7,cas1_I_II_III_IV_V_VI_8,cas2_I_II_III_IV_V_VI_5,cas4_I_II_III_IV_V_VI_1,cas6_I_II_III_IV_V_VI_15
GCA_000015805.1_CAS_Class1-Subtype-III-B_3	CasFinder	CAS_Class1-Subtype-III-B	ABO07708.1	ABO07713.1	ABO07708.1,ABO07709.1,ABO07710.1,ABO07711.1,ABO07712.1,ABO07713.1	6	cmr3gr5_III-B_III-C_4,cas10_III_1,cmr4gr7_III-B_III-C_1,cmr5gr11_III-B_16,cmr1gr7_III-B_4,cmr6gr7_III-B_3
GCA_000015805.1_CAS_Class1-Subtype-III-B_4	CasFinder	CAS_Class1-Subtype-III-B	ABO08698.1	ABO08711.1	ABO08698.1,ABO08699.1,ABO08700.1,ABO08701.1,ABO08702.1,ABO08705.1,ABO08707.1,ABO08708.1,ABO08709.1,ABO08710.1,ABO08711.1	11	cas4_I_II_III_IV_V_VI_7,cas1_I_II_III_IV_V_VI_8,cas2_I_II_III_IV_V_VI_5,cas4_I_II_III_IV_V_VI_1,cas6_I_II_III_IV_V_VI_15,csm6_III_3,cmr3gr5_III-B_III-C_4,cas10_III_1,cmr4gr7_III-B_III-C_1,cmr1gr7_III-B_4,cmr6gr7_III-B_3
GCA_000015825.1_SoFic_1	SoFIC	SoFic	ABN57400.1	ABN57400.1	ABN57400.1	1	SoFic__SoFic
GCA_000015825.1_SoFic_2	SoFIC	SoFic	ABN58187.1	ABN58187.1	ABN58187.1	1	SoFic__SoFic
GCA_000015825.1_Tiamat_3	Tiamat	Tiamat	ABN57403.1	ABN57403.1	ABN57403.1	1	Tiamat__TmtA_2752664533
GCA_000015825.1_RM_Type_I_4	RM	RM_Type_I	ABN57025.1	ABN57027.1	ABN57025.1,ABN57026.1,ABN57027.1	3	RM__Type_I_MTases,RM__Type_I_S,RM__Type_I_REases
GCA_000015825.1_RM_Type_IIG_5	RM	RM_Type_IIG	ABN57090.1	ABN57090.1	ABN57090.1	1	RM_Type_IIG__Type_IIG
GCA_000015945.1_RM_Type_I_1	RM	RM_Type_I	ABN69862.1	ABN69864.1	ABN69862.1,ABN69863.1,ABN69864.1	3	RM__Type_I_MTases,RM__Type_I_S,RM__Type_I_REases
[truncated: 300,607+ more rows]

## Sheet: ST4
Supplementary Table 4. Cas cassettes predicted by CRISPR-Cas typer in archaeal genomes
[truncated: 4,114 more rows]

[truncated: 4 more sheets: ST5, ST6, ST7, ST9]
